# Supplementary material
Source: PubMed Central journal article supplement (PMC4765922)
Supplement: NIHMS752504-supplement-SI.pdf [file NIHMS752504-supplement-SI.pdf]

# Evans Enolates: Solution Structures of Lithiated Oxazolidinone-Derived Enolates

Evan H. Tallmadge and David B. Collum\*

Department of Chemistry and Chemical Biology

Baker Laboratory, Cornell University

Ithaca, New York 14853-1301

E-mail: dbc6@cornell.edu

**Chart 1.** Substrates S-12

## Part 1: Dimer Characterization

---

|                   |                                                                                                         |      |
|-------------------|---------------------------------------------------------------------------------------------------------|------|
| <b>Figure 1.</b>  | <sup>6</sup> Li NMR spectra of the method of continuous variation of <b>7</b> and <b>18</b> in THF      | S-15 |
| <b>Figure 2.</b>  | Job plot of <b>7</b> and <b>18</b> in THF                                                               | S-16 |
| <b>Figure 3.</b>  | <sup>6</sup> Li NMR spectra of the method of continuous variation of <b>7</b> and its enantiomer in THF | S-17 |
| <b>Figure 4.</b>  | Job plot of <b>7</b> and its enantiomer in THF                                                          | S-18 |
| <b>Figure 5.</b>  | <sup>6</sup> Li NMR spectra of <b>7</b> with changing enolate concentration in DMEA                     | S-19 |
| <b>Figure 6.</b>  | <sup>6</sup> Li NMR spectra of the solvent swap between THF and DMEA with <b>7</b>                      | S-20 |
| <b>Figure 7.</b>  | <sup>6</sup> Li NMR spectra of the solvation of <b>7</b> with pyridine                                  | S-21 |
| <b>Figure 8.</b>  | <sup>6</sup> Li NMR spectra of the method of continuous variation of <b>10</b> and <b>15</b> in THF     | S-22 |
| <b>Figure 9.</b>  | Job plot of <b>10</b> and <b>15</b> in THF                                                              | S-23 |
| <b>Figure 10.</b> | <sup>6</sup> Li NMR spectra of the method of continuous variation of <b>10</b> and <b>16</b> in THF     | S-24 |
| <b>Figure 11.</b> | Job plot of <b>10</b> and <b>16</b> in THF                                                              | S-25 |

|                   |                                                                                                     |      |
|-------------------|-----------------------------------------------------------------------------------------------------|------|
| <b>Figure 12.</b> | <sup>6</sup> Li NMR spectra of the method of continuous variation of <b>7</b> and <b>15</b> in THF  | S-26 |
| <b>Figure 13.</b> | Job plot of <b>7</b> and <b>15</b> in THF                                                           | S-27 |
| <b>Figure 14.</b> | <sup>6</sup> Li NMR spectra of the method of continuous variation of <b>7</b> and <b>16</b> in THF  | S-28 |
| <b>Figure 15.</b> | Job plot of <b>7</b> and <b>16</b> in THF                                                           | S-29 |
| <b>Figure 16.</b> | <sup>6</sup> Li NMR spectra of the method of continuous variation of <b>15</b> and <b>16</b> in THF | S-30 |
| <b>Figure 17.</b> | Job plot of <b>15</b> and <b>16</b> in THF                                                          | S-31 |
| <b>Figure 18.</b> | <sup>6</sup> Li NMR spectra of the method of continuous variation of <b>7</b> and <b>8</b> in THF   | S-32 |
| <b>Figure 19.</b> | <sup>6</sup> Li NMR spectra of the method of continuous variation of <b>12</b> and <b>18</b> in THF | S-33 |
| <b>Figure 20.</b> | <sup>6</sup> Li NMR spectra of the method of continuous variation of <b>8</b> and <b>15</b> in THF  | S-34 |
| <b>Figure 21</b>  | <sup>6</sup> Li NMR spectra of the method of continuous variation of <b>8</b> and <b>17</b> in THF  | S-35 |

## Part 2: Uncharacterized/oligomerized substrates

---

|                   |                                                                                                          |      |
|-------------------|----------------------------------------------------------------------------------------------------------|------|
| <b>Figure 22.</b> | <sup>6</sup> Li NMR spectra of changing concentration of <b>22</b>                                       | S-36 |
| <b>Figure 23.</b> | <sup>6</sup> Li NMR spectra of the method of continuous variation of <b>22</b> and its enantiomer in THF | S-37 |
| <b>Figure 24.</b> | <sup>6</sup> Li NMR spectra of changing equivalents of THF with <b>33</b>                                | S-38 |
| <b>Figure 25.</b> | <sup>6</sup> Li NMR spectrum of <b>23</b> in THF                                                         | S-39 |
| <b>Figure 26.</b> | <sup>6</sup> Li NMR spectrum of <b>24</b> in THF                                                         | S-40 |
| <b>Figure 27.</b> | <sup>6</sup> Li NMR spectrum of <b>25</b> in THF                                                         | S-41 |
| <b>Figure 28.</b> | <sup>6</sup> Li NMR spectrum of <b>26</b> in THF                                                         | S-42 |
| <b>Figure 29.</b> | <sup>6</sup> Li NMR spectrum of <b>27</b> in THF                                                         | S-43 |

|                   |                                                |      |
|-------------------|------------------------------------------------|------|
| <b>Figure 30.</b> | $^6\text{Li}$ NMR spectrum of <b>28</b> in THF | S-44 |
| <b>Figure 31.</b> | $^6\text{Li}$ NMR spectrum of <b>29</b> in THF | S-45 |

### Part 3: Solvation Studies of **5** and **6**

---

|                   |                                                                                           |      |
|-------------------|-------------------------------------------------------------------------------------------|------|
| <b>Figure 32.</b> | $^6\text{Li}$ NMR spectra of <b>5</b> with changing pyridine                              | S-46 |
| <b>Figure 33.</b> | $^6\text{Li}$ NMR spectra of <b>6</b> with changing pyridine                              | S-47 |
| <b>Figure 34.</b> | $^6\text{Li}$ NMR spectra of <b>5</b> with changing THF concentration                     | S-48 |
| <b>Figure 35.</b> | Fit of aggregate concentration vs. changing THF for <b>5</b> to determine dimer solvation | S-49 |
| <b>Figure 36.</b> | $^6\text{Li}$ NMR spectra of <b>6</b> with changing THF concentration                     | S-50 |
| <b>Figure 37.</b> | Fit of aggregate concentration vs. changing THF for <b>6</b> to determine dimer solvation | S-51 |

### Part 4: Aggregation Studies of **5** and **6**

---

|                   |                                                                                                              |      |
|-------------------|--------------------------------------------------------------------------------------------------------------|------|
| <b>Figure 38.</b> | $^6\text{Li}$ NMR spectra of the method of continuous variation of <b>5</b> and <b>6</b> in THF and pyridine | S-52 |
| <b>Figure 39.</b> | Job plot of the dimers of <b>5</b> and <b>6</b>                                                              | S-53 |
| <b>Figure 40.</b> | $^6\text{Li}$ NMR spectrum of the tetramer of <b>5</b>                                                       | S-54 |
| <b>Figure 41.</b> | $^6\text{Li}$ NMR spectrum of a 9.8:0.2 mixture of the tetramers of <b>5</b> and <b>6</b>                    | S-55 |
| <b>Figure 42.</b> | $^6\text{Li}$ NMR spectrum of a 9.6:0.4 mixture of the tetramers of <b>5</b> and <b>6</b>                    | S-56 |
| <b>Figure 43.</b> | $^6\text{Li}$ NMR spectrum of a 9.4:0.6 mixture of the tetramers of <b>5</b> and <b>6</b>                    | S-57 |
| <b>Figure 44.</b> | $^6\text{Li}$ NMR spectrum of a 9.2:0.8 mixture of the tetramers of <b>5</b> and <b>6</b>                    | S-58 |
| <b>Figure 45.</b> | $^6\text{Li}$ NMR spectrum of a 9:1 mixture of the                                                           | S-59 |

|                   |                                                                                                                   |      |
|-------------------|-------------------------------------------------------------------------------------------------------------------|------|
|                   | tetramers of <b>5</b> and <b>6</b>                                                                                |      |
| <b>Figure 46.</b> | <sup>6</sup> Li NMR spectrum of a 8:2 mixture of the tetramers of <b>5</b> and <b>6</b>                           | S-60 |
| <b>Figure 47.</b> | <sup>6</sup> Li NMR spectrum of a 7:3 mixture of the tetramers of <b>5</b> and <b>6</b>                           | S-61 |
| <b>Figure 48.</b> | <sup>6</sup> Li NMR spectrum of a 6:4 mixture of the tetramers of <b>5</b> and <b>6</b>                           | S-62 |
| <b>Figure 49.</b> | <sup>6</sup> Li NMR spectrum of a 5:5 mixture of the tetramers of <b>5</b> and <b>6</b>                           | S-63 |
| <b>Figure 50.</b> | <sup>6</sup> Li NMR spectrum of a 4:6 mixture of the tetramers of <b>5</b> and <b>6</b>                           | S-64 |
| <b>Figure 51.</b> | <sup>6</sup> Li NMR spectrum of a 3:7 mixture of the tetramers of <b>5</b> and <b>6</b>                           | S-65 |
| <b>Figure 52.</b> | <sup>6</sup> Li NMR spectrum of a 2:8 mixture of the tetramers of <b>5</b> and <b>6</b>                           | S-66 |
| <b>Figure 53.</b> | <sup>6</sup> Li NMR spectrum of a 1:9 mixture of the tetramers of <b>5</b> and <b>6</b>                           | S-67 |
| <b>Figure 54.</b> | <sup>6</sup> Li NMR spectrum of a 0.8:9.2 mixture of the tetramers of <b>5</b> and <b>6</b>                       | S-68 |
| <b>Figure 55.</b> | <sup>6</sup> Li NMR spectrum of a 0.6:9.4 mixture of the tetramers of <b>5</b> and <b>6</b>                       | S-69 |
| <b>Figure 56.</b> | <sup>6</sup> Li NMR spectrum of a 0.4:9.6 mixture of the tetramers of <b>5</b> and <b>6</b>                       | S-70 |
| <b>Figure 57.</b> | <sup>6</sup> Li NMR spectrum of a 0.2:9.8 mixture of the tetramers of <b>5</b> and <b>6</b>                       | S-71 |
| <b>Figure 58.</b> | <sup>6</sup> Li NMR spectrum of the tetramer of <b>6</b>                                                          | S-72 |
| <b>Figure 59.</b> | <sup>6</sup> Li NMR of <b>5</b> with changing enolate concentration                                               | S-73 |
| <b>Figure 60.</b> | Plot of the relative integrations of the two dimers of <b>5</b>                                                   | S-74 |
| <b>Figure 61.</b> | Fit of aggregate concentration vs. changing enolate concentration for <b>5</b> to show tetramer-dimer equilibrium | S-75 |

|                    |                                                                                                            |      |
|--------------------|------------------------------------------------------------------------------------------------------------|------|
| <b>Equation 1.</b> | Derivation of the best fit of Figures 43 and 46                                                            | S-76 |
| <b>Figure 62.</b>  | <sup>6</sup> Li NMR of 6 with changing enolate concentration                                               | S-77 |
| <b>Figure 63.</b>  | Plot of the relative integrations of the two dimers of 5                                                   | S-78 |
| <b>Figure 64.</b>  | Fit of aggregate concentration vs. changing enolate concentration for 5 to show tetramer-dimer equilibrium | S-79 |
| <b>Figure 65.</b>  | <sup>13</sup> C NMR of 5 tetramer                                                                          | S-80 |
| <b>Figure 66.</b>  | <sup>13</sup> C NMR of 6 tetramer                                                                          | S-81 |
| <b>Figure 67.</b>  | <sup>6</sup> Li NMR characterization of the mixed LDA-5 mixed aggregate                                    | S-82 |
| <b>Figure 68.</b>  | <sup>6</sup> Li NMR characterization of the mixed LDA-6 mixed aggregate                                    | S-83 |

#### Part 5: Dimer Computations

---

|                 |                                                                                        |      |
|-----------------|----------------------------------------------------------------------------------------|------|
| <b>Table 1.</b> | Geometric coordinates and thermally corrected MP2 energies for THF                     | S-84 |
| <b>Table 2.</b> | Geometric coordinates and thermally corrected MP2 energies for DMEA                    | S-85 |
| <b>Table 3.</b> | Geometric coordinates and thermally corrected MP2 energies for pyridine                | S-86 |
| <b>Table 4.</b> | Geometric coordinates and thermally corrected MP2 energies for LDA with two THF        | S-87 |
| <b>Table 5.</b> | Geometric coordinates and thermally corrected MP2 energies for LDA with three THF      | S-89 |
| <b>Table 6.</b> | Geometric coordinates and thermally corrected MP2 energies for 10 dimer with three THF | S-91 |
| <b>Table 7.</b> | Geometric coordinates and thermally corrected MP2 energies for 10 spirocyclic          | S-93 |

|                  |                                                                                                                              |       |
|------------------|------------------------------------------------------------------------------------------------------------------------------|-------|
|                  | dimer with three THF                                                                                                         |       |
| <b>Table 8.</b>  | Geometric coordinates and thermally corrected MP2 energies for <b>10</b> $D_{2d}$ tetramer                                   | S-95  |
| <b>Table 9.</b>  | Geometric coordinates and thermally corrected MP2 energies for <b>10</b> $S_4$ tetramer                                      | S-97  |
| <b>Table 10.</b> | Geometric coordinates and thermally corrected MP2 energies for <b>7</b> dimer with one THF                                   | S-99  |
| <b>Table 11.</b> | Geometric coordinates and thermally corrected MP2 energies for <b>7</b> dimer with two THF                                   | S-101 |
| <b>Table 12.</b> | Geometric coordinates and thermally corrected MP2 energies for <b>7</b> dimer with no THF                                    | S-103 |
| <b>Table 13.</b> | Geometric coordinates and thermally corrected MP2 energies for <b>7</b> spirocyclic dimer with no THF                        | S-105 |
| <b>Table 14.</b> | Geometric coordinates and thermally corrected MP2 energies for <b>7</b> dimer with one DMEA                                  | S-107 |
| <b>Table 15.</b> | Geometric coordinates and thermally corrected MP2 energies for <b>7</b> dimer with two DMEA                                  | S-109 |
| <b>Table 16.</b> | Geometric coordinates and thermally corrected MP2 energies for <b>7</b> spirocyclic dimer with one DMEA                      | S-111 |
| <b>Table 17.</b> | Geometric coordinates and thermally corrected MP2 energies for <b>7</b> spirocyclic dimer with two DMEA isomer 1             | S-113 |
| <b>Table 18.</b> | Geometric coordinates and thermally corrected MP2 energies for <b>7</b> spirocyclic dimer with two DMEA isomer 2             | S-115 |
| <b>Table 19.</b> | Geometric coordinates and thermally corrected MP2 energies for <b>7</b> spirocyclic dimer unsymmetric with two DMEA isomer 1 | S-117 |
| <b>Table 20.</b> | Geometric coordinates and thermally corrected MP2 energies for <b>7</b> spirocyclic dimer                                    | S-119 |

unsymmetric with two DMEA isomer 2

|                  |                                                                                            |       |
|------------------|--------------------------------------------------------------------------------------------|-------|
| <b>Table 21.</b> | Geometric coordinates and thermally corrected MP2 energies for 7 $D_{2d}$ tetramer         | S-121 |
| <b>Table 22.</b> | Geometric coordinates and thermally corrected MP2 energies for 7 $S_4$ tetramer            | S-124 |
| <b>Table 23.</b> | Geometric coordinates and thermally corrected MP2 energies for 18 dimer with two THF       | S-127 |
| <b>Table 24.</b> | Geometric coordinates and thermally corrected MP2 energies for 18 dimer trans with two THF | S-129 |

## Part 6: 5 Ground State Computations

---

|                  |                                                                                                              |       |
|------------------|--------------------------------------------------------------------------------------------------------------|-------|
| <b>Table 25.</b> | Geometric coordinates and thermally corrected MP2 energies for 5 dimer with no THF                           | S-131 |
| <b>Table 26.</b> | Geometric coordinates and thermally corrected MP2 energies for 5 dimer with one THF                          | S-133 |
| <b>Table 27.</b> | Geometric coordinates and thermally corrected MP2 energies for 5 dimer with one THF                          | S-135 |
| <b>Table 28.</b> | Geometric coordinates and thermally corrected MP2 energies for 5 dimer trans solvated with two THF           | S-137 |
| <b>Table 29.</b> | Geometric coordinates and thermally corrected MP2 energies for 5 dimer cis solvated with two THF             | S-139 |
| <b>Table 30.</b> | Geometric coordinates and thermally corrected MP2 energies for 5 dimer unsymmetrically solvated with two THF | S-141 |
| <b>Table 31.</b> | Geometric coordinates and thermally corrected MP2 energies for 5 dimer with three THF                        | S-143 |

|                  |                                                                                                        |       |
|------------------|--------------------------------------------------------------------------------------------------------|-------|
| <b>Table 32.</b> | Geometric coordinates and thermally corrected MP2 energies for 5 spirocyclic dimer with no THF         | S-145 |
| <b>Table 33.</b> | Geometric coordinates and thermally corrected MP2 energies for 5 spirocyclic dimer with one THF        | S-147 |
| <b>Table 34.</b> | Geometric coordinates and thermally corrected MP2 energies for 5 spirocyclic dimer with two THF        | S-149 |
| <b>Table 35.</b> | Geometric coordinates and thermally corrected MP2 energies for 5 spirocyclic dimer with two THF isomer | S-151 |
| <b>Table 36.</b> | Geometric coordinates and thermally corrected MP2 energies for 5 spirocyclic dimer trans with two THF  | S-153 |
| <b>Table 37.</b> | Geometric coordinates and thermally corrected MP2 energies for 5 spirocyclic dimer with three THF      | S-155 |
| <b>Table 38.</b> | Geometric coordinates and thermally corrected MP2 energies for 5 $D_{2d}$ tetramer                     | S-157 |
| <b>Table 39.</b> | Geometric coordinates and thermally corrected MP2 energies for 5 $S_4$ tetramer                        | S-159 |
| <b>Table 40.</b> | Geometric coordinates and thermally corrected MP2 energies for 5 $D_{2d}$ tetramer with one THF        | S-161 |
| <b>Table 41.</b> | Geometric coordinates and thermally corrected MP2 energies for 5 $D_{2d}$ tetramer 1 pyridine          | S-163 |
| <b>Table 42.</b> | Geometric coordinates and thermally corrected MP2 energies for 5 hexamer                               | S-165 |
| <b>Table 43.</b> | Geometric coordinates and thermally corrected MP2 energies for 5 monomer with no THF                   | S-168 |
| <b>Table 44.</b> | Geometric coordinates and thermally corrected MP2 energies for 5 monomer with one THF                  | S-169 |



|                  |                                                                                                                         |       |
|------------------|-------------------------------------------------------------------------------------------------------------------------|-------|
| <b>Table 45.</b> | Geometric coordinates and thermally corrected MP2 energies for <b>5</b> monomer with two THF                            | S-170 |
| <b>Table 46.</b> | Geometric coordinates and thermally corrected MP2 energies for <b>5</b> monomer with three THF                          | S-172 |
| <b>Table 47.</b> | Geometric coordinates and thermally corrected MP2 energies for <b>5</b> LDA mixed dimer with three THF                  | S-174 |
| <b>Table 48.</b> | Geometric coordinates and thermally corrected MP2 energies for <b>5</b> LDA mixed spirocyclic dimer with three THF      | S-176 |
| <b>Table 49.</b> | Geometric coordinates and thermally corrected MP2 energies for <b>5</b> and <b>18</b> mixed dimer with three THF        | S-178 |
| <b>Table 50.</b> | Geometric coordinates and thermally corrected MP2 energies for <b>5</b> and <b>18</b> mixed dimer with three THF isomer | S-180 |

## Part 7: 6 Ground State Computations

---

|                  |                                                                                                                     |       |
|------------------|---------------------------------------------------------------------------------------------------------------------|-------|
| <b>Table 51.</b> | Geometric coordinates and thermally corrected MP2 energies for <b>6</b> trans disolvated dimer with two THF         | S-182 |
| <b>Table 52.</b> | Geometric coordinates and thermally corrected MP2 energies for <b>6</b> cis disolvated dimer with two THF           | S-184 |
| <b>Table 53.</b> | Geometric coordinates and thermally corrected MP2 energies for <b>6</b> unsymmetrically solvated dimer with two THF | S-186 |
| <b>Table 54.</b> | Geometric coordinates and thermally corrected MP2 energies for <b>6</b> dimer with three THF                        | S-188 |
| <b>Table 55.</b> | Geometric coordinates and thermally corrected MP2 energies for <b>6</b> spirocyclic dimer with two THF              | S-190 |

|                  |                                                                                                                         |       |
|------------------|-------------------------------------------------------------------------------------------------------------------------|-------|
| <b>Table 56.</b> | Geometric coordinates and thermally corrected MP2 energies for <b>6</b> spirocyclic dimer with no THF isomer 1          | S-192 |
| <b>Table 57.</b> | Geometric coordinates and thermally corrected MP2 energies for <b>6</b> spirocyclic dimer with one THF isomer 1         | S-194 |
| <b>Table 58.</b> | Geometric coordinates and thermally corrected MP2 energies for <b>6</b> spirocyclic dimer with two THF isomer 1         | S-196 |
| <b>Table 59.</b> | Geometric coordinates and thermally corrected MP2 energies for <b>6</b> spirocyclic dimer with no THF isomer 2          | S-198 |
| <b>Table 60.</b> | Geometric coordinates and thermally corrected MP2 energies for <b>6</b> spirocyclic dimer with one THF isomer 2         | S-200 |
| <b>Table 61.</b> | Geometric coordinates and thermally corrected MP2 energies for <b>6</b> spirocyclic dimer with two THF isomer 2         | S-202 |
| <b>Table 62.</b> | Geometric coordinates and thermally corrected MP2 energies for <b>6</b> trans disolvated spirocyclic dimer with two THF | S-204 |
| <b>Table 63.</b> | Geometric coordinates and thermally corrected MP2 energies for <b>6</b> spirocyclic dimer with three THF                | S-206 |
| <b>Table 64.</b> | Geometric coordinates and thermally corrected MP2 energies for <b>6</b> S <sub>4</sub> tetramer                         | S-208 |
| <b>Table 65.</b> | Geometric coordinates and thermally corrected MP2 energies for <b>6</b> D <sub>2d</sub> tetramer                        | S-210 |

## Part 7: Tetramer Computations

---

|                  |                                                                                                   |       |
|------------------|---------------------------------------------------------------------------------------------------|-------|
| <b>Table 66.</b> | Geometric coordinates and thermally corrected MP2 energies for <b>30</b> D <sub>2d</sub> tetramer | S-212 |
| <b>Table 67.</b> | Geometric coordinates and thermally corrected MP2 energies for <b>30</b> S <sub>4</sub> tetramer  | S-214 |

|                  |                                                                                            |        |
|------------------|--------------------------------------------------------------------------------------------|--------|
| <b>Table 68.</b> | Geometric coordinates and thermally corrected MP2 energies for <b>31</b> $D_{2d}$ tetramer | S-216  |
| <b>Table 69.</b> | Geometric coordinates and thermally corrected MP2 energies for <b>31</b> $S_4$ tetramer    | S-218  |
| <b>Table 70.</b> | Geometric coordinates and thermally corrected MP2 energies for <b>32</b> $D_{2d}$ tetramer | S-220  |
| <b>Table 71.</b> | Geometric coordinates and thermally corrected MP2 energies for <b>32</b> $S_4$ tetramer    | S-222  |
| <b>Table 72.</b> | Geometric coordinates and thermally corrected MP2 energies for <b>24</b> $D_{2d}$ tetramer | S-224  |
| <b>Table 73.</b> | Geometric coordinates and thermally corrected MP2 energies for <b>24</b> $S_4$ tetramer    | S-226  |
| <b>Table 74.</b> | Geometric coordinates and thermally corrected MP2 energies for <b>28</b> $D_{2d}$ tetramer | S-228  |
| <b>Table 75.</b> | Geometric coordinates and thermally corrected MP2 energies for <b>28</b> $S_4$ tetramer    | S- 230 |

**Chart 1. Substrates**

|                                                                                                  |                                                                                                      |                                                                                                      |                                                                                                        |                                                                                                        |
|--------------------------------------------------------------------------------------------------|------------------------------------------------------------------------------------------------------|------------------------------------------------------------------------------------------------------|--------------------------------------------------------------------------------------------------------|--------------------------------------------------------------------------------------------------------|
| <p>Dimer/<br/>Tetramer mix</p>                                                                   | 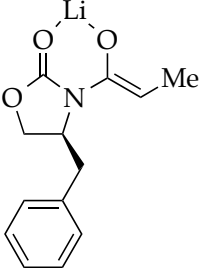 <p><b>5</b></p>    |  <p><b>6</b></p>    |                                                                                                        |                                                                                                        |
| <p>Dimer in neat<br/>THF, oligomer<br/>at low THF</p>                                            |  <p><b>10</b></p>   |                                                                                                      |                                                                                                        |                                                                                                        |
| <p>Dimers except<br/>under unusual<br/>conditions<br/>(low DMEA or<br/>TMCDA in<br/>toluene)</p> |  <p><b>7</b></p>   |                                                                                                      |                                                                                                        |                                                                                                        |
| <p>Dimers</p>                                                                                    |  <p><b>8</b></p>  |  <p><b>12</b></p> |  <p><b>15</b></p> |  <p><b>16</b></p> |
|                                                                                                  |  <p><b>17</b></p> |  <p><b>18</b></p> |                                                                                                        |                                                                                                        |

|                                                    |                                                                                                                                  |                                                                                                                                  |                                                                                                                                    |                                                                                                                                    |
|----------------------------------------------------|----------------------------------------------------------------------------------------------------------------------------------|----------------------------------------------------------------------------------------------------------------------------------|------------------------------------------------------------------------------------------------------------------------------------|------------------------------------------------------------------------------------------------------------------------------------|
| Sharp undetermined aggregate that ages to oligomer | 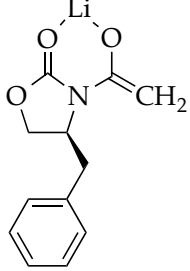 <p style="text-align: center;"><b>24</b></p>   |                                                                                                                                  |                                                                                                                                    |                                                                                                                                    |
| Sharp but undetermined aggregates                  |  <p style="text-align: center;"><b>22</b></p>   |  <p style="text-align: center;"><b>23</b></p>   |  <p style="text-align: center;"><b>25</b></p>    |  <p style="text-align: center;"><b>26</b></p>   |
|                                                    |  <p style="text-align: center;"><b>27</b></p>  |  <p style="text-align: center;"><b>28</b></p>  |  <p style="text-align: center;"><b>29</b></p>   |  <p style="text-align: center;"><b>33</b></p>  |
| Oligomers                                          |  <p style="text-align: center;"><b>9</b></p>  |  <p style="text-align: center;"><b>11</b></p> |  <p style="text-align: center;"><b>13</b></p>  |  <p style="text-align: center;"><b>14</b></p> |
|                                                    |  <p style="text-align: center;"><b>19</b></p> |  <p style="text-align: center;"><b>30</b></p> |  <p style="text-align: center;"><b>35</b></p> |  <p style="text-align: center;"><b>40</b></p> |

|                   |                                                                                                                                |                                                                                                                                |                                                                                                                                  |                                                                                                                                  |
|-------------------|--------------------------------------------------------------------------------------------------------------------------------|--------------------------------------------------------------------------------------------------------------------------------|----------------------------------------------------------------------------------------------------------------------------------|----------------------------------------------------------------------------------------------------------------------------------|
|                   | 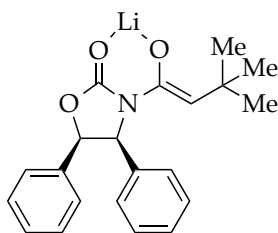 <p style="text-align: center;"><b>41</b></p> |  <p style="text-align: center;"><b>42</b></p> |  <p style="text-align: center;"><b>43</b></p> |  <p style="text-align: center;"><b>44</b></p> |
| Computations Only |  <p style="text-align: center;"><b>31</b></p> |  <p style="text-align: center;"><b>32</b></p> |                                                                                                                                  |                                                                                                                                  |

## Part 1: Dimer Characterization

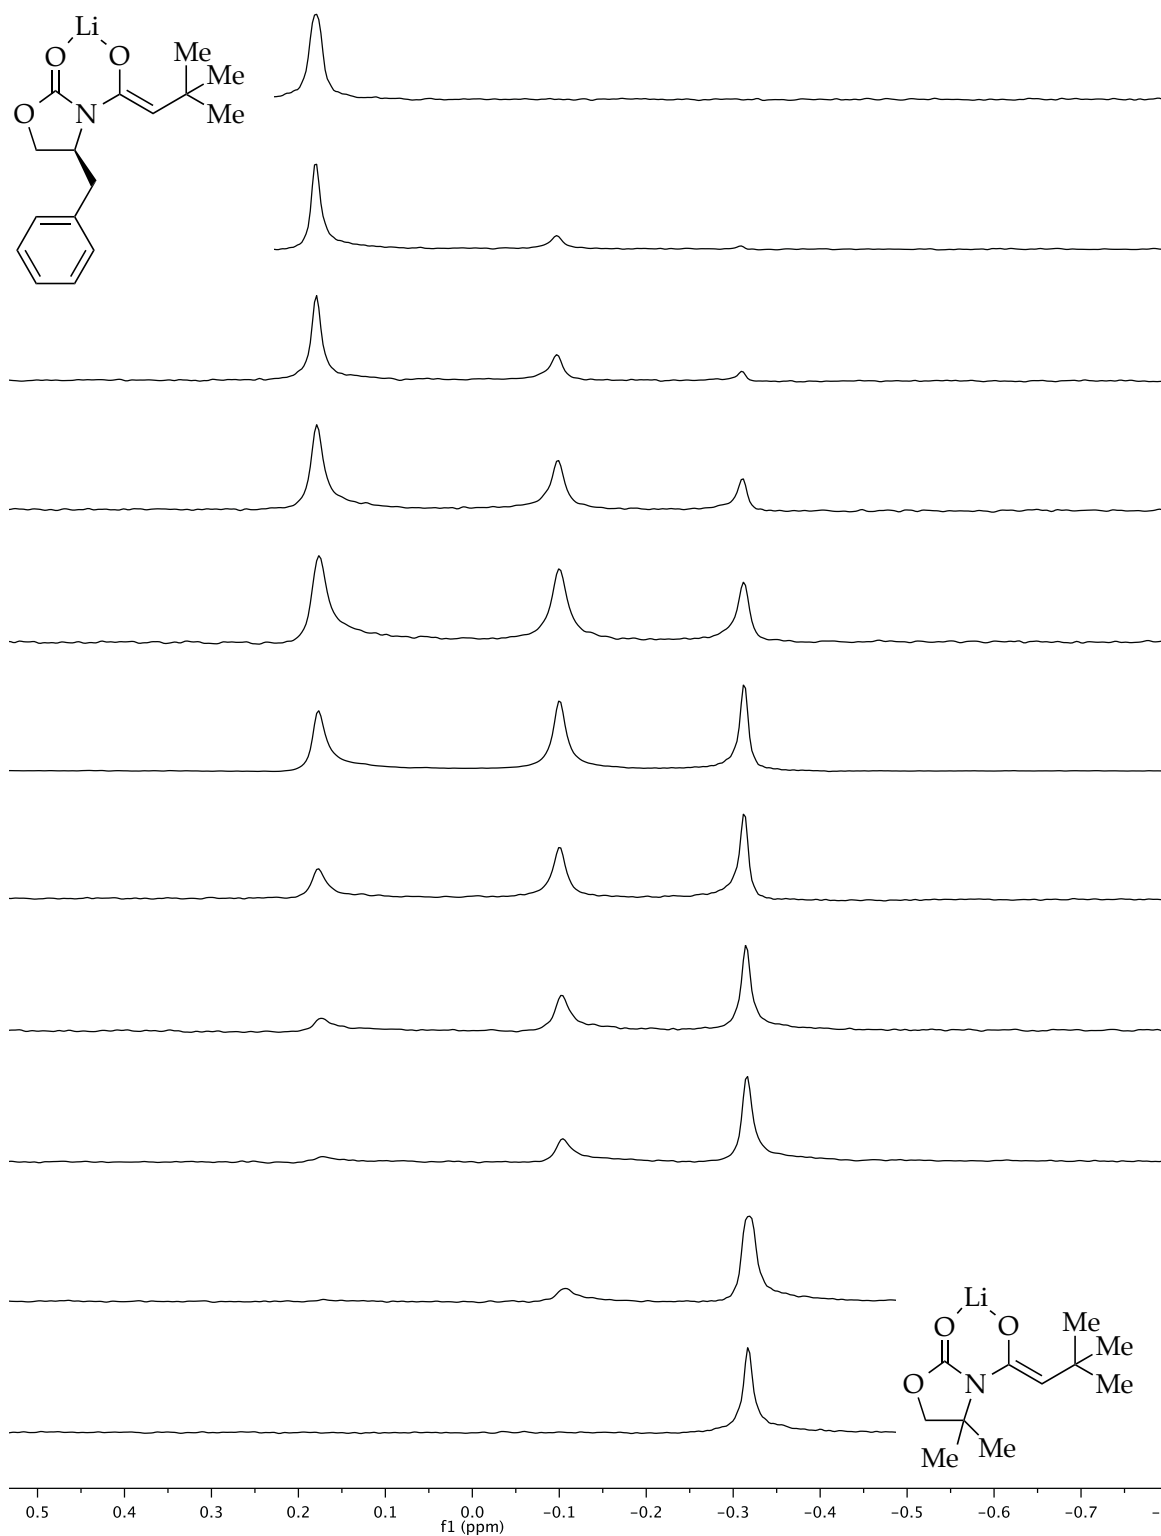

**Figure 1.**  $^6\text{Li}$  NMR spectra of the method of continuous variation of **7/18** dimers (0.10 M total oxazolidinone, 0.105 M [ $^6\text{Li}$ ]LDA) in neat THF at  $-80^\circ\text{C}$ .

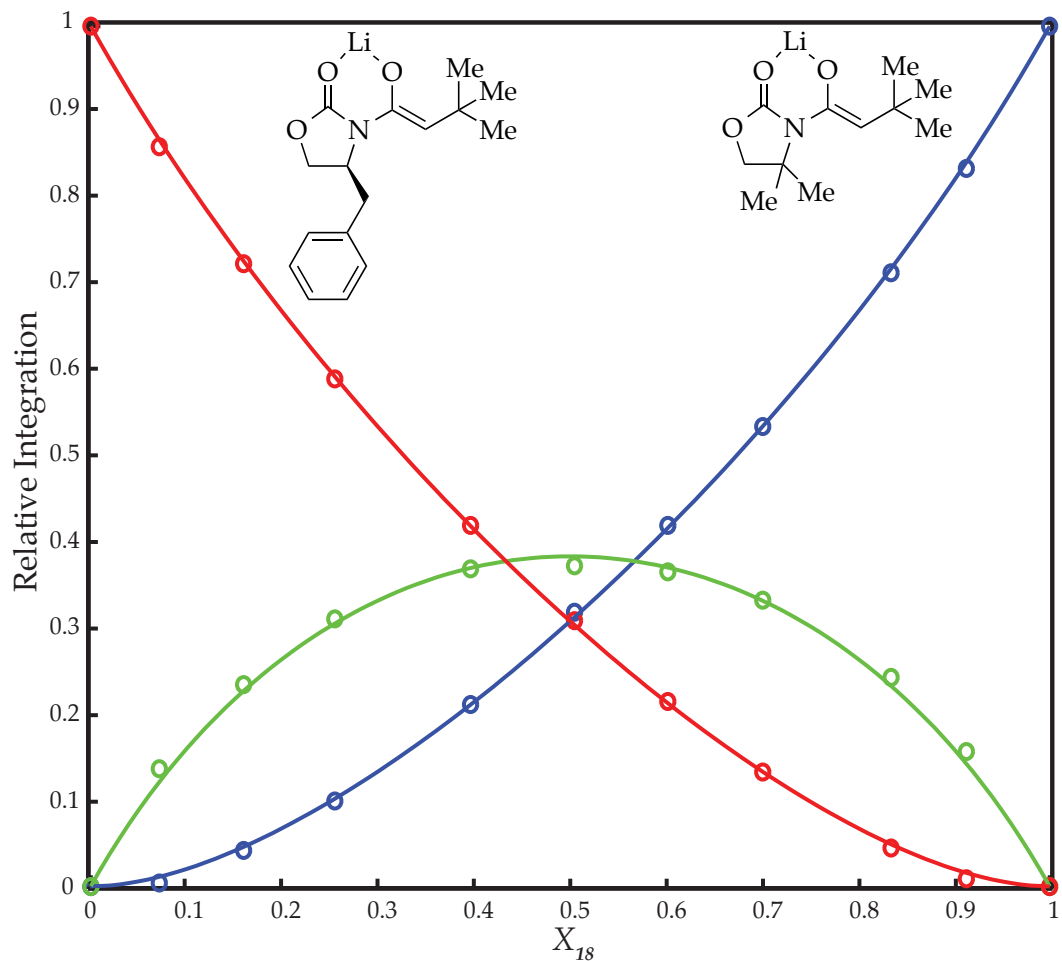

**Figure 2.** Job plot of **7** and **18** dimers (0.10 M total oxazolidinone, 0.105 M [<sup>6</sup>Li]LDA) in neat THF at -80 °C. The relative integrations are plotted as a function of the mole fraction of **18**.



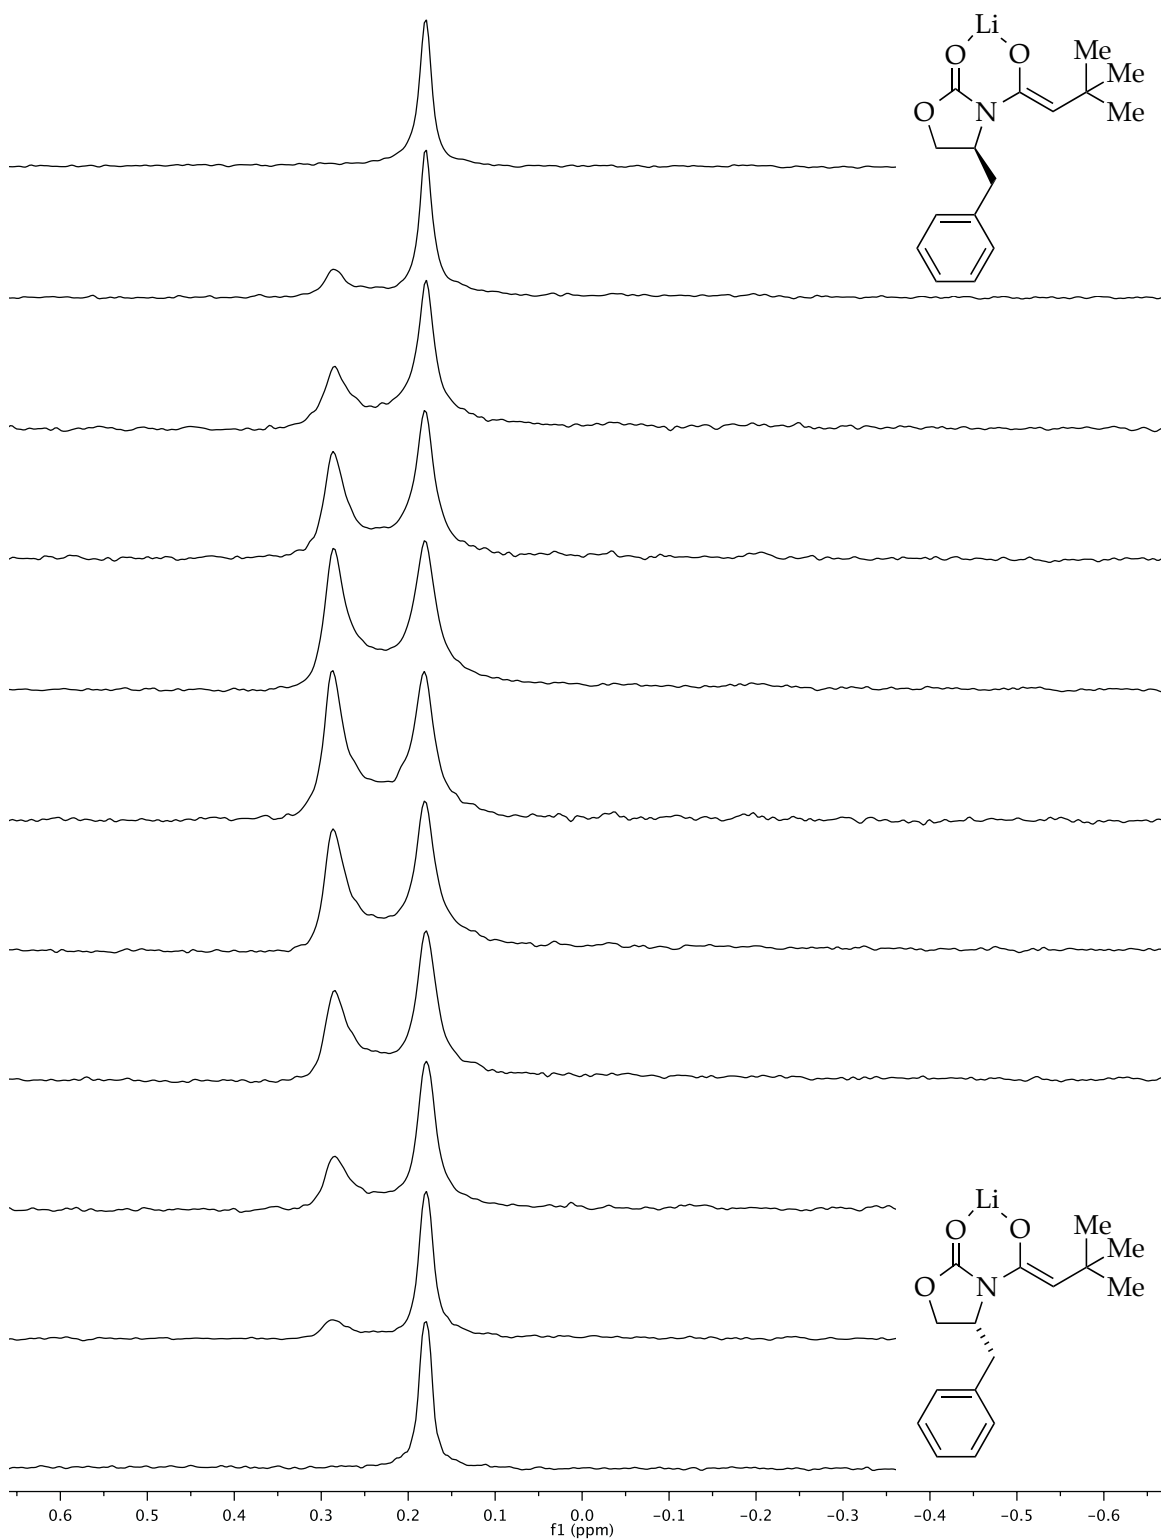

**Figure 3.**  $^6\text{Li}$  NMR spectra of the method of continuous variation of **(S)-7**/**(R)-7** dimers (0.10 M total oxazolidinone, 0.11 M [ $^6\text{Li}$ ]LDA) in neat THF at  $-80^\circ\text{C}$ .

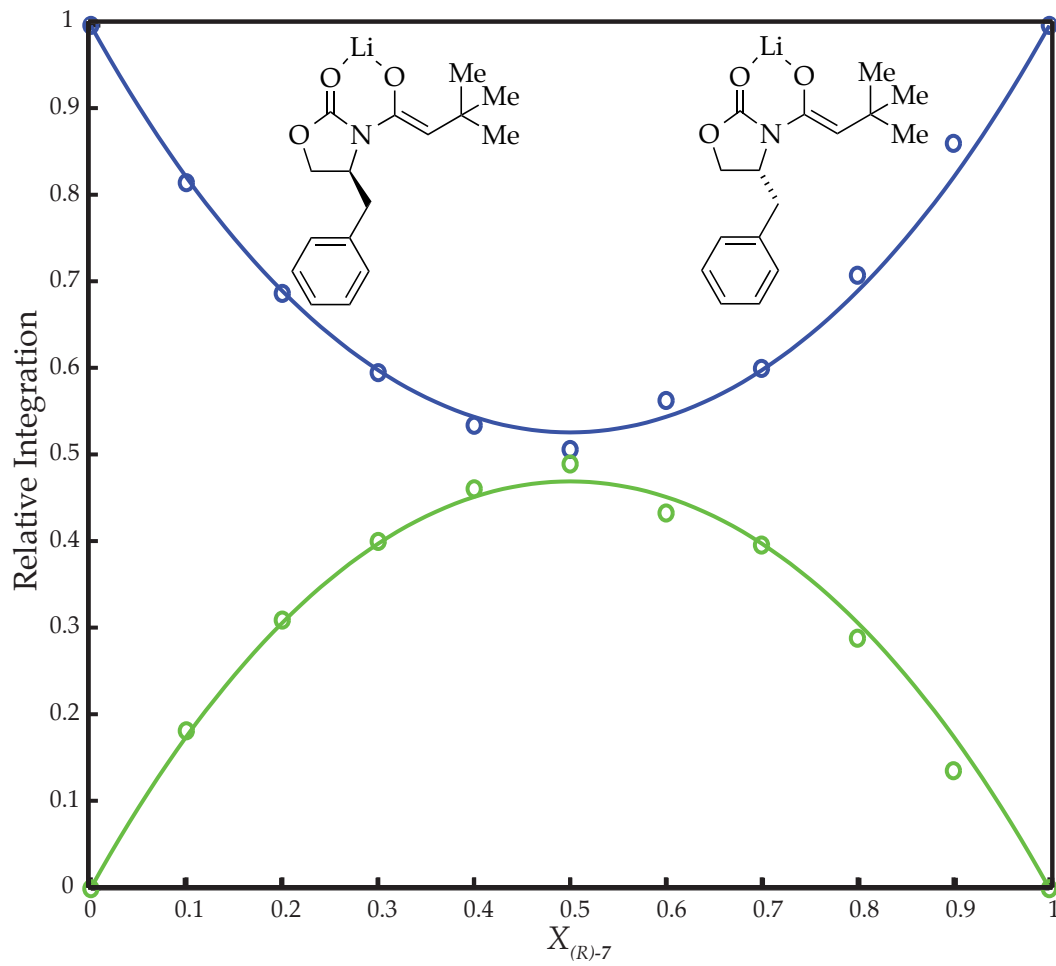

**Figure 4.** Job plot of (S)-7/(R)-7 dimers (0.10 M total substrate, 0.11 M [<sup>6</sup>Li]LDA) in neat THF at -80 °C. The relative integrations of the homoaggregates and the heteroaggregate are plotted as a function of the mole fraction of (R)-7.

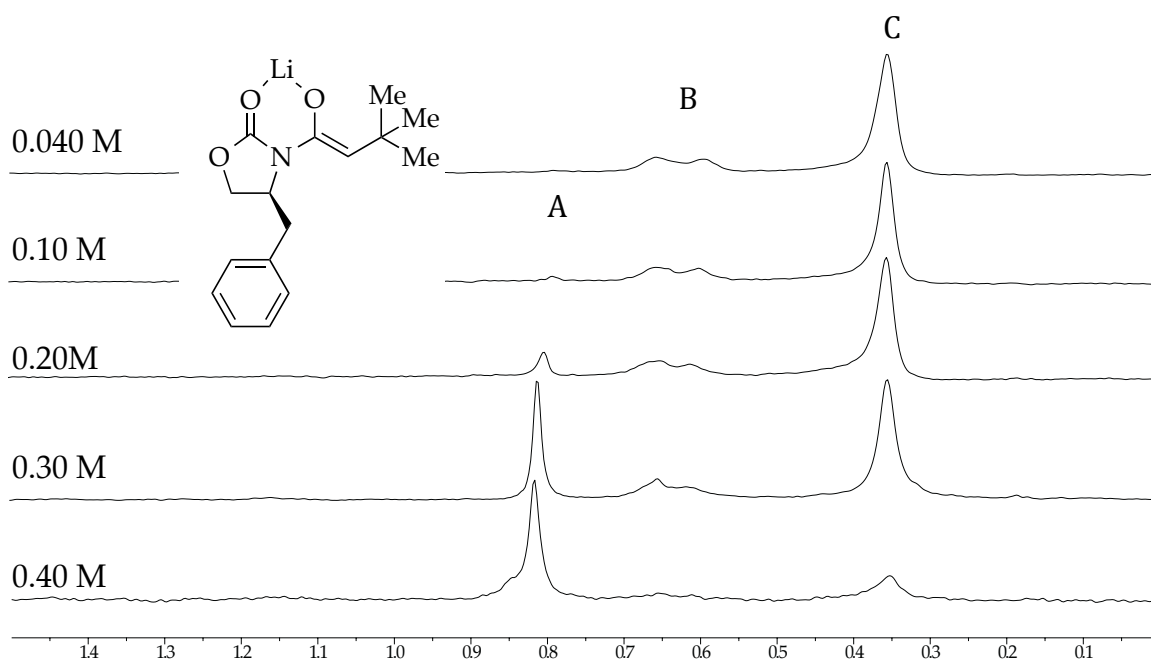

**Figure 5.**  $^6\text{Li}$  NMR spectra of **7** at varying enolate concentrations (as labeled) in neat THF at  $-100\text{ }^\circ\text{C}$ . **A** is an unknown higher aggregate; **B** is a pair of 1:1 peaks that are both dimers, **C** is a dimer. Mixed aggregate appears far downfield ( $>2.0$  ppm).

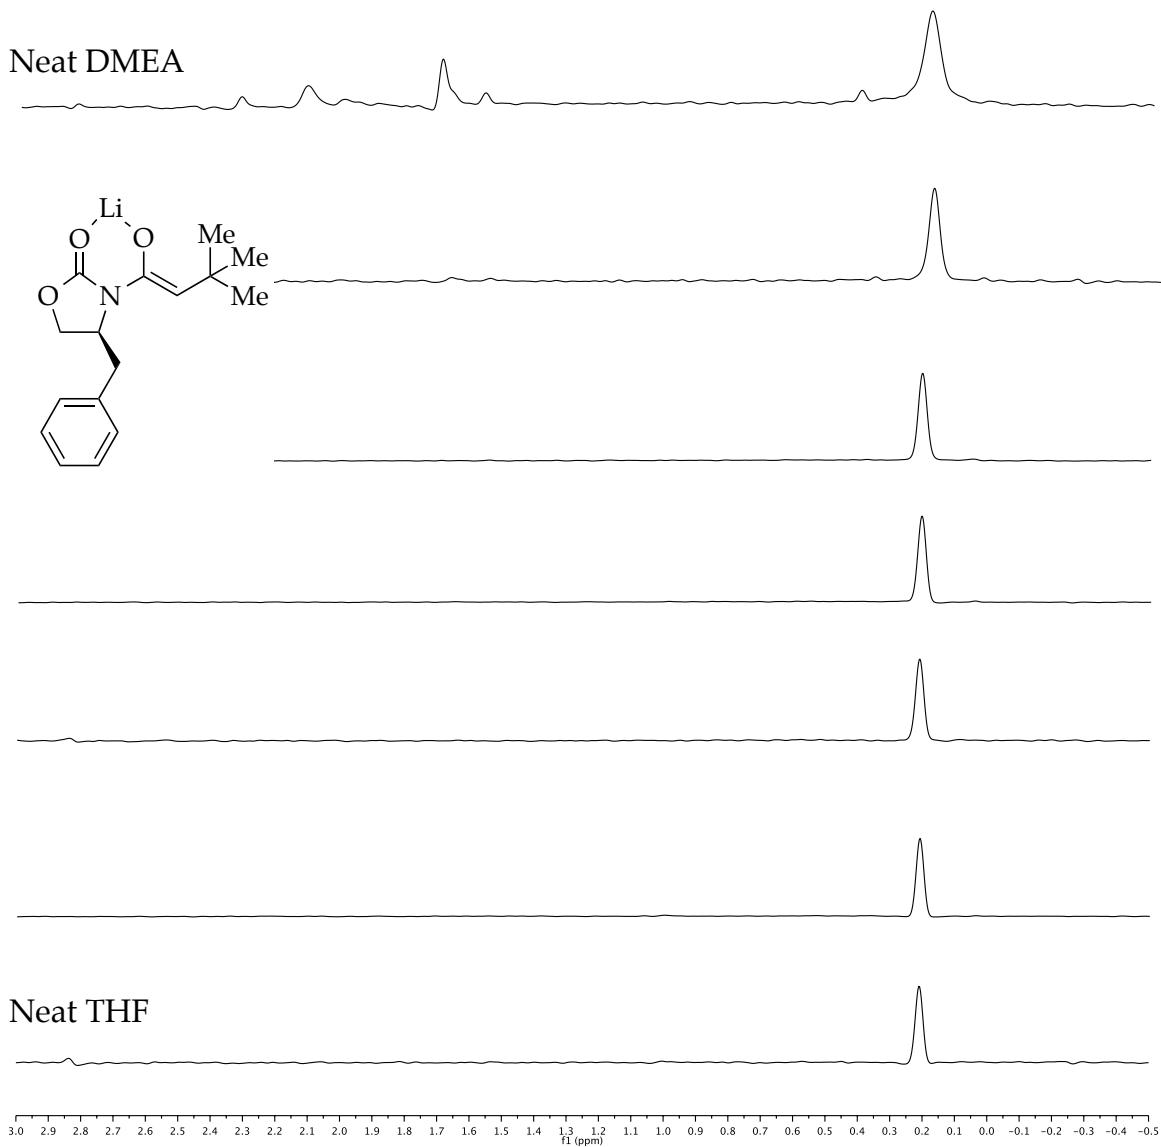

**Figure 6.**  $^6\text{Li}$  NMR spectra of a solvent swap between DMEA and THF with **7** at 0.10 M and  $-80\text{ }^\circ\text{C}$ .

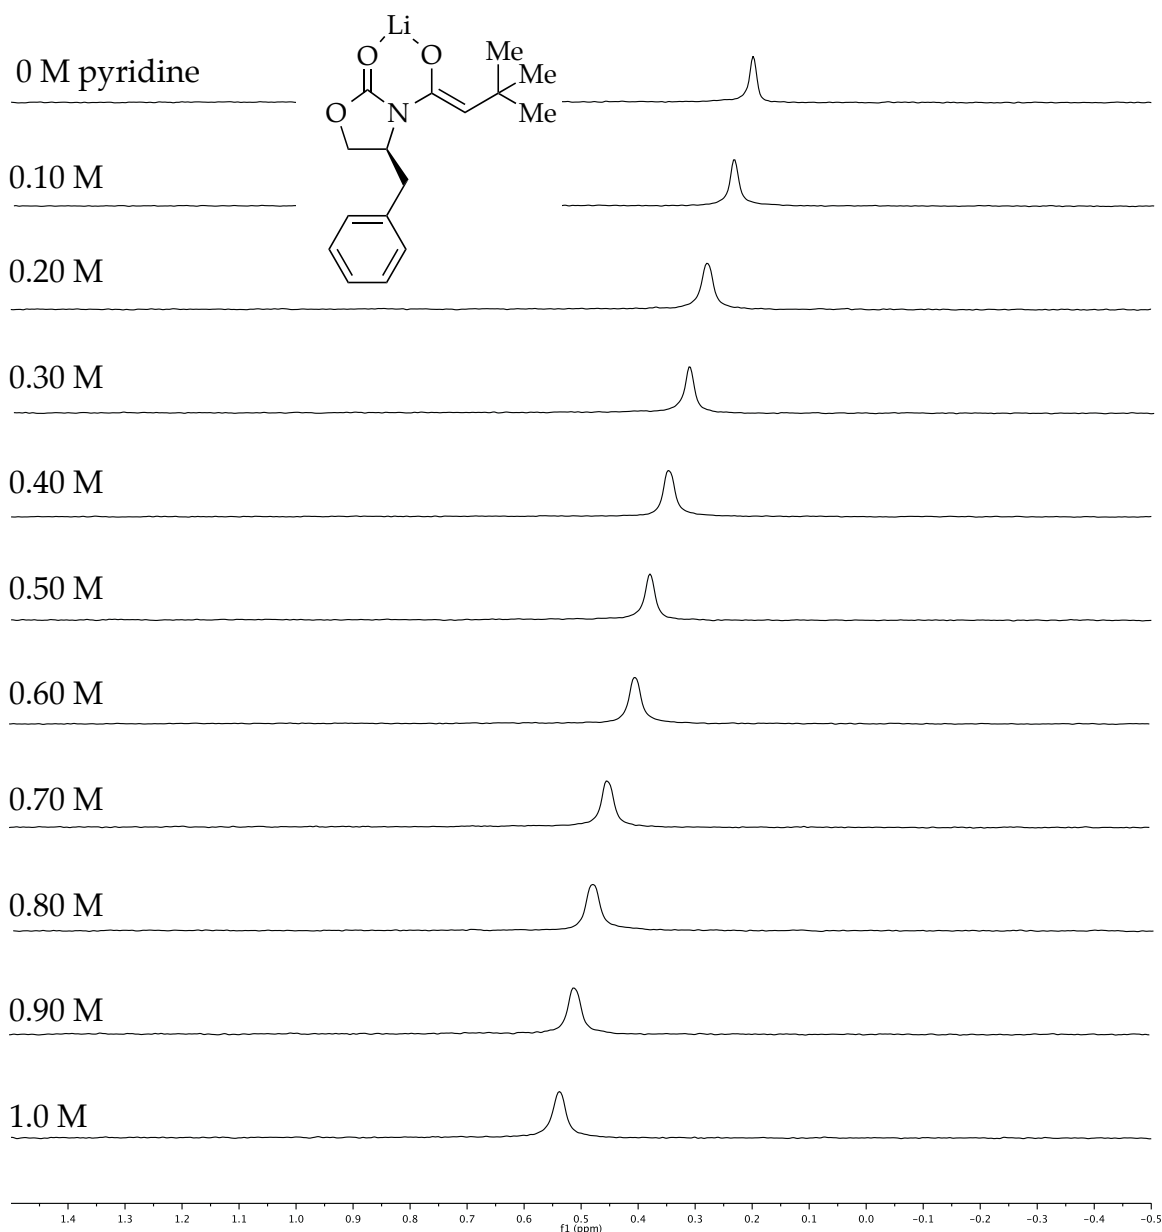

**Figure 7.**  $^6\text{Li}$  NMR spectra of the solvation of 7 with pyridine in neat THF at 0.10 M and  $-80\text{ }^\circ\text{C}$ .

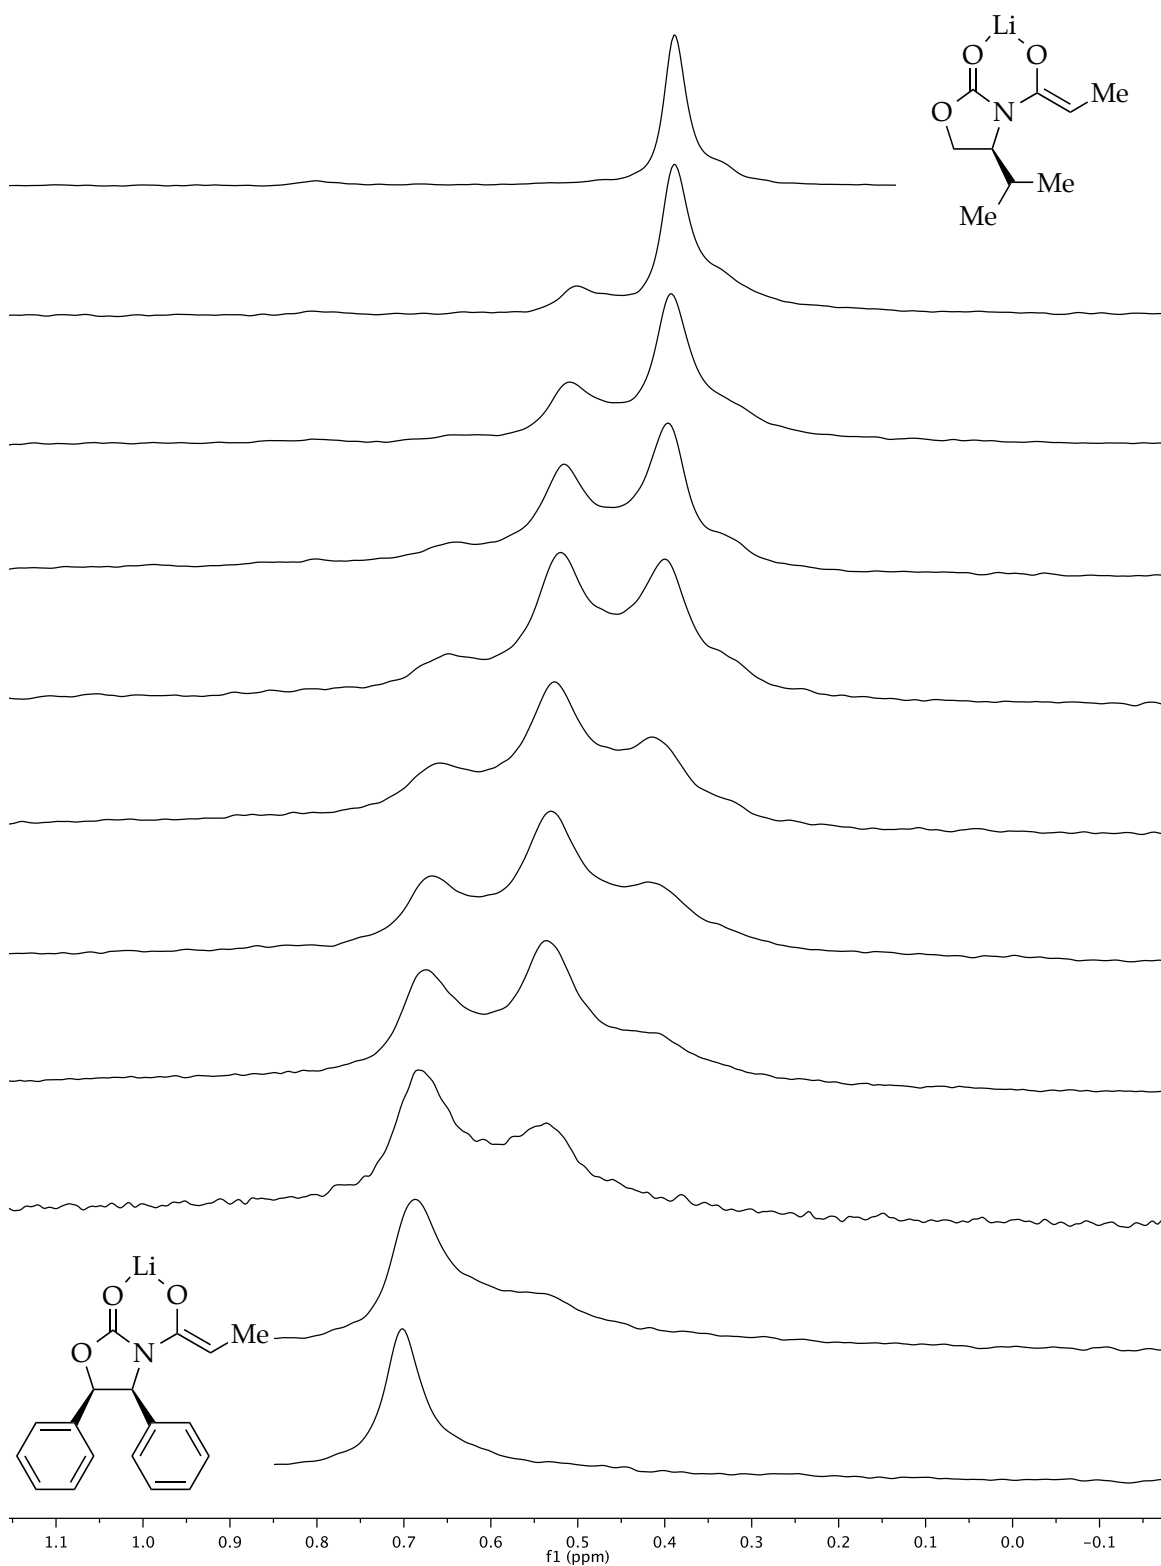

**Figure 8.**  $^6\text{Li}$  NMR spectra of the method of continuous variation of **10** and **15** (0.10 M total oxazolidinone, 0.11 M [ $^6\text{Li}$ ]LDA) in neat THF at  $-80\text{ }^\circ\text{C}$ .

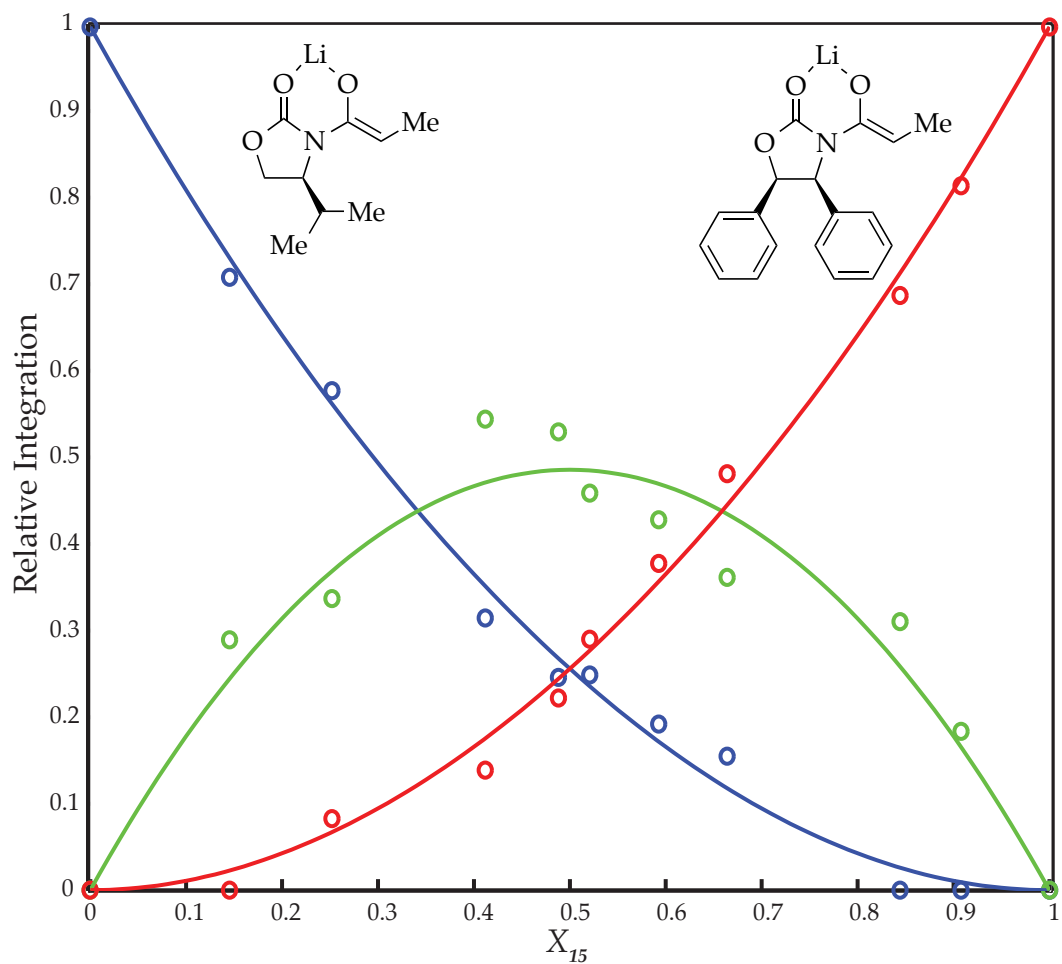

**Figure 9.** Job plot of **10** and **15** (0.10 M total oxazolidinone, 0.11 M [<sup>6</sup>Li]LDA) in neat THF at -80 °C. The relative integrations of the homoaggregates and the heteroaggregate are plotted as a function of the mole fraction of **15**.

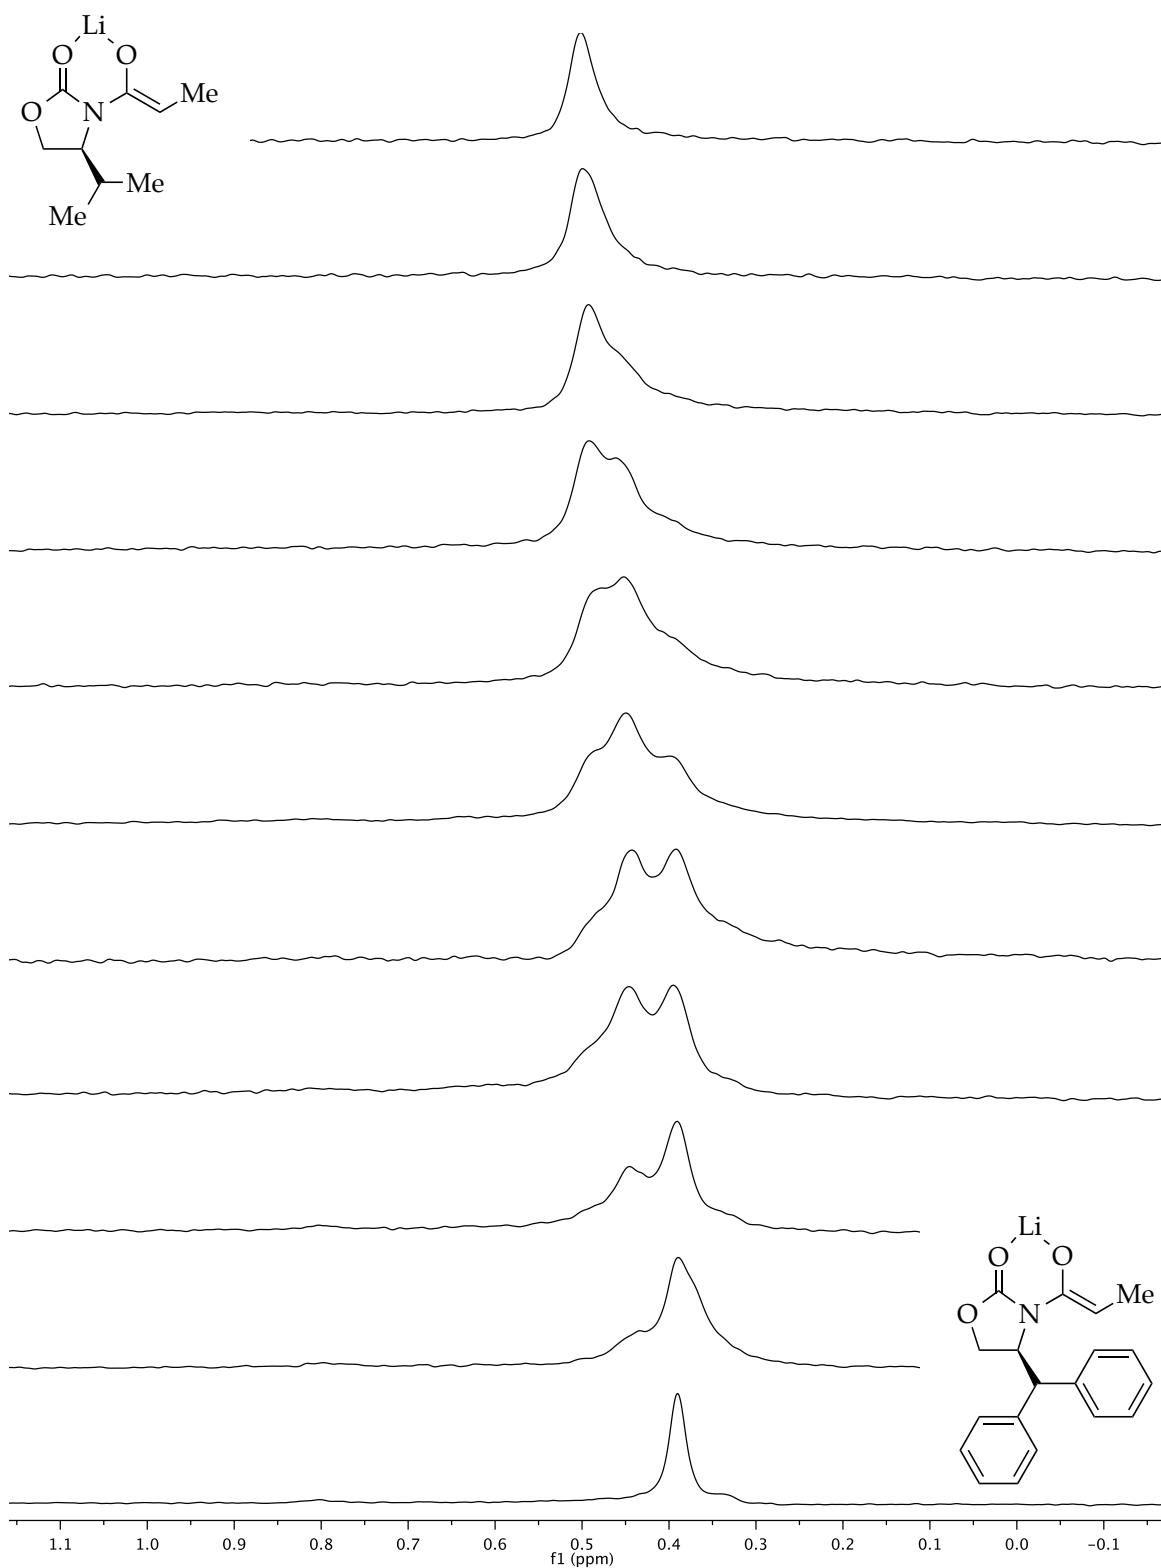

**Figure 10.**  $^6\text{Li}$  NMR spectra of the method of continuous variation of **10** and **16** (0.10 M total oxazolidinone, 0.11 M [ $^6\text{Li}$ ]LDA) in neat THF at  $-80^\circ\text{C}$ .



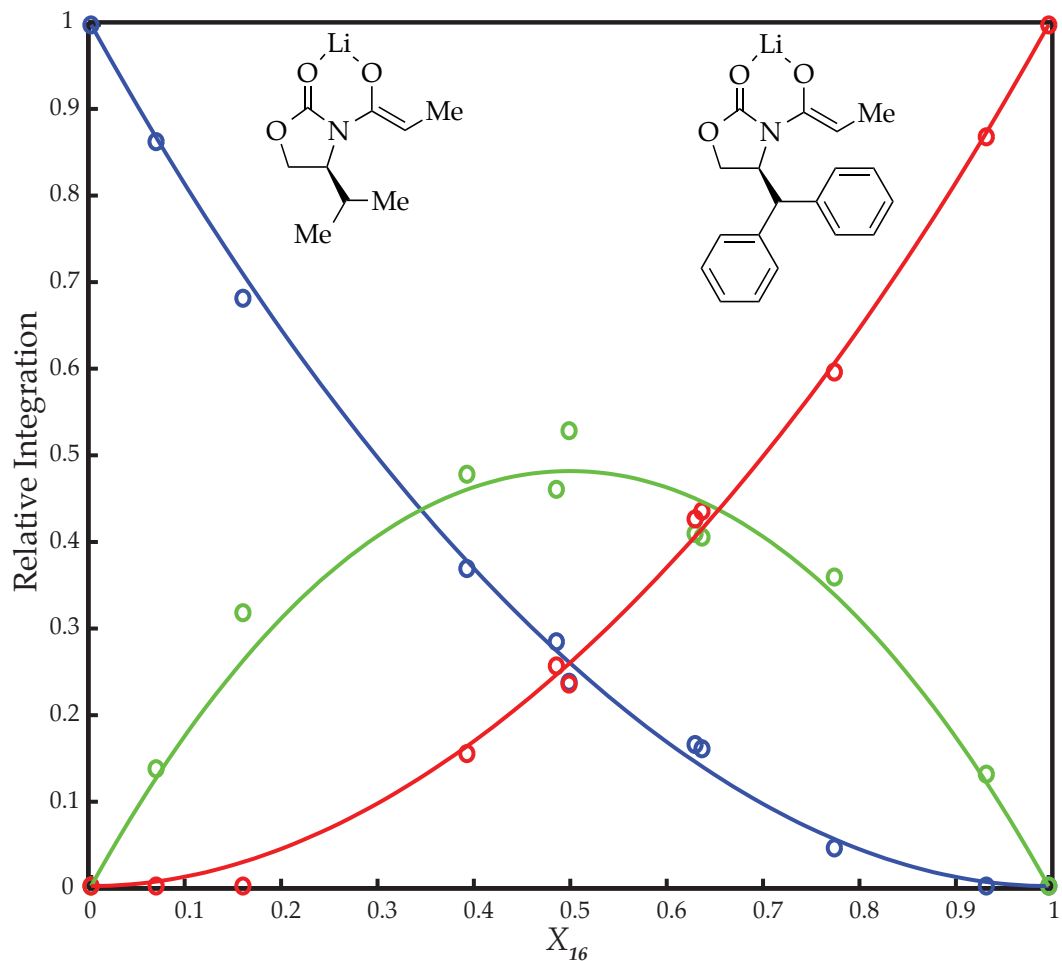

**Figure 11.** Job plot of **10** and **16** (0.10 M total oxazolidinone, 0.11 M [<sup>6</sup>Li]LDA) in neat THF at -80 °C. The relative integrations of the homoaggregates and the heteroaggregate are plotted as a function of the mole fraction of **16**.

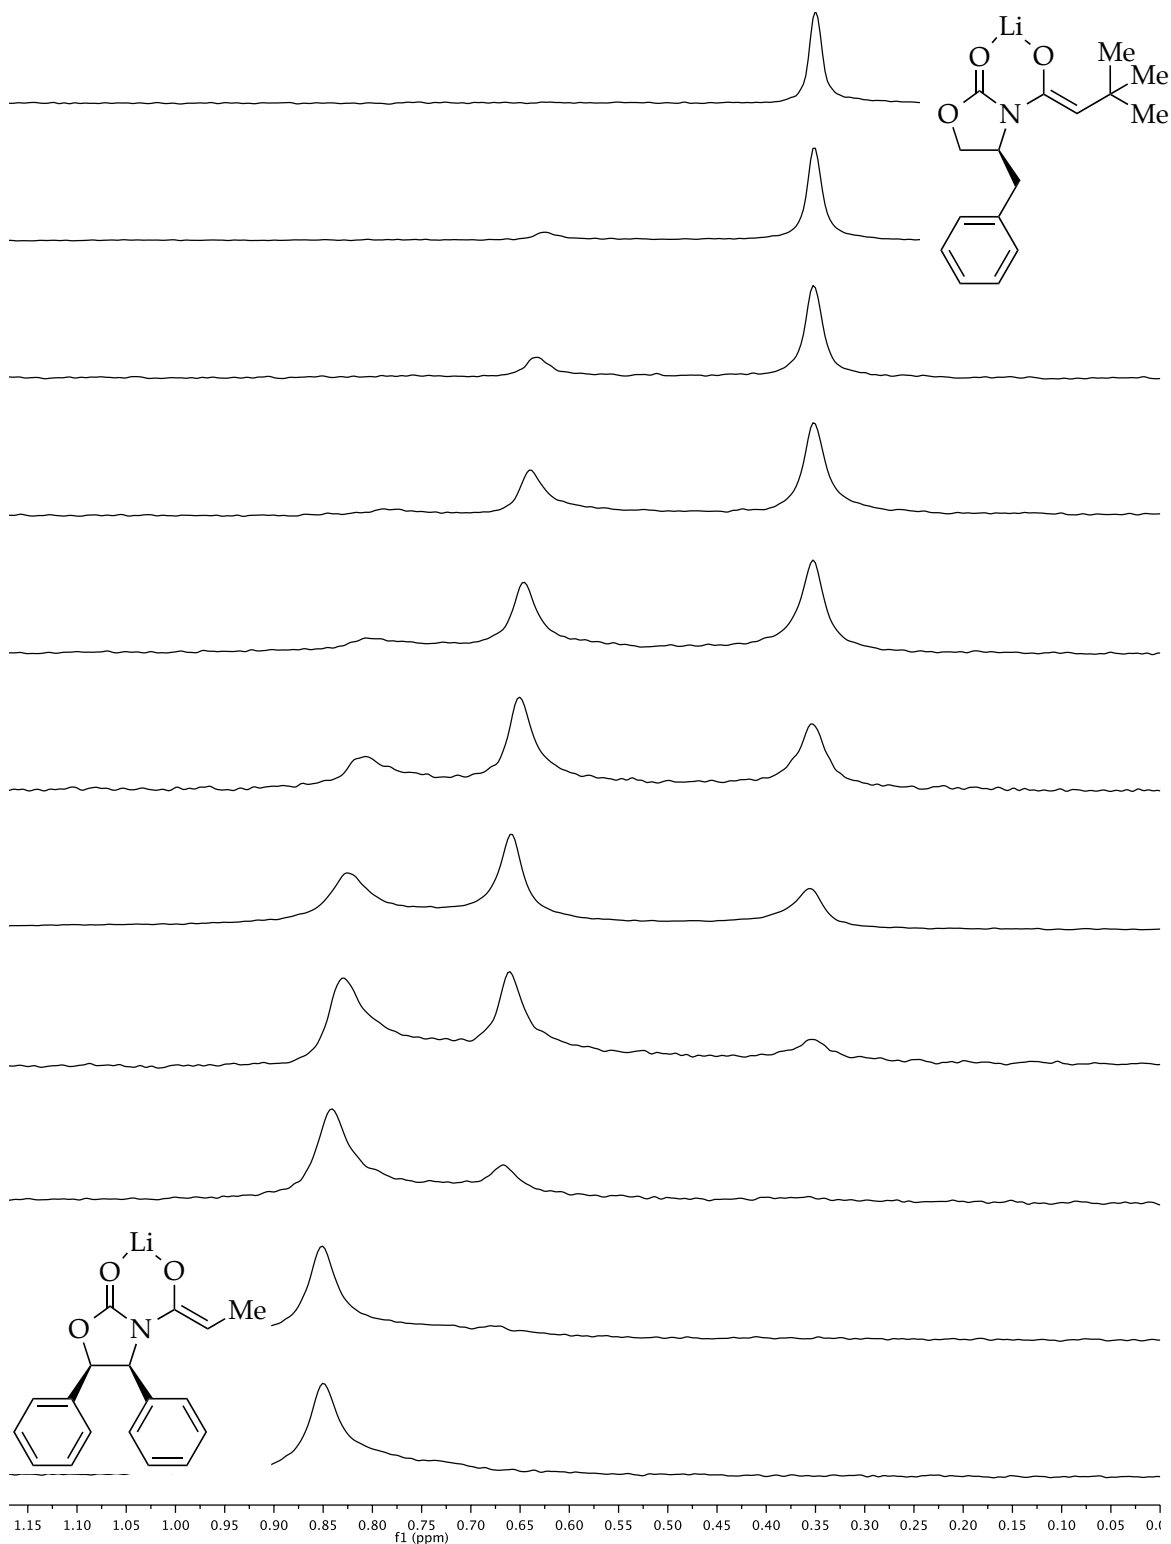

**Figure 12.**  $^6\text{Li}$  NMR spectra of the method of continuous variation of **7** and **15** (0.10 M total oxazolidinone, 0.11 M  $[\text{Li}]\text{LDA}$ ) in neat THF at  $-80\text{ }^\circ\text{C}$ .

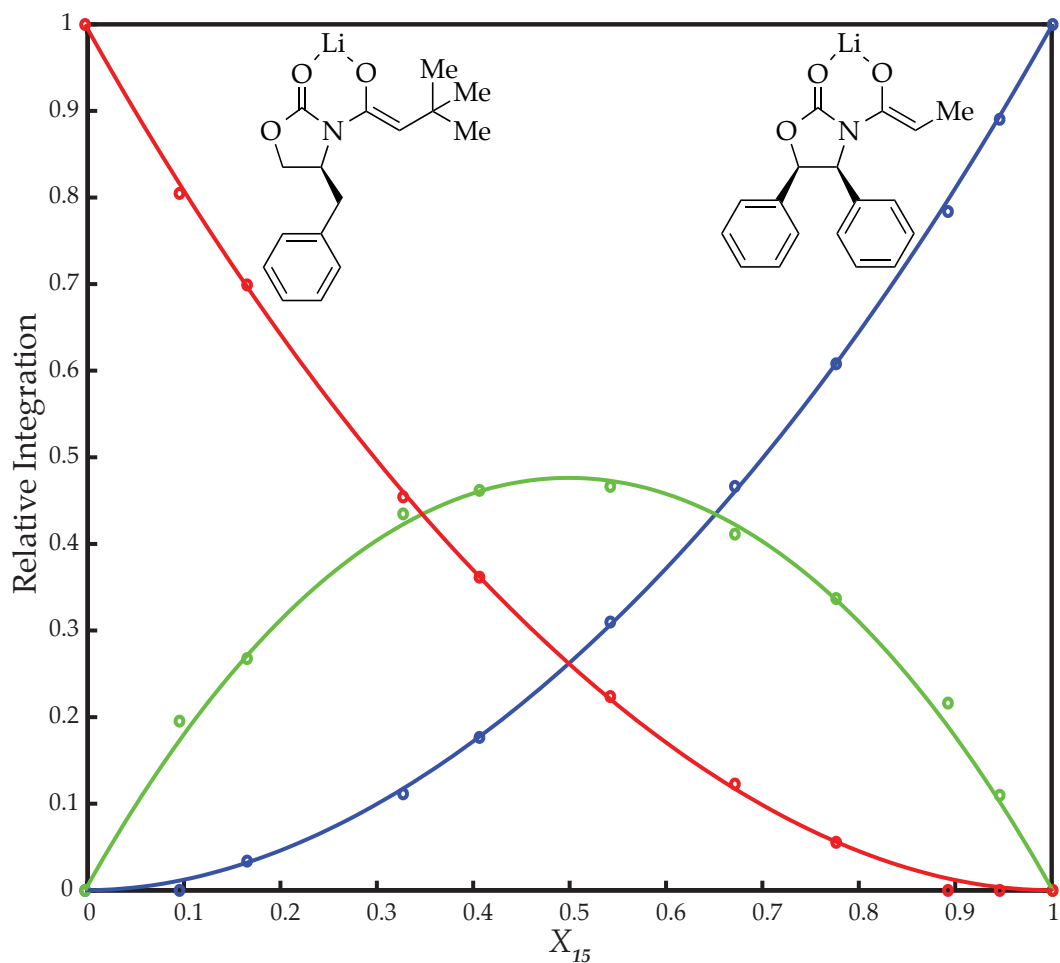

**Figure 13.** Job plot of **7** and **15** (0.10 M total oxazolidinone, 0.11 M [<sup>6</sup>Li]LDA) in neat THF at -80 °C. The relative integrations of the homoaggregates and the heteroaggregate are plotted as a function of the mole fraction of **15**.

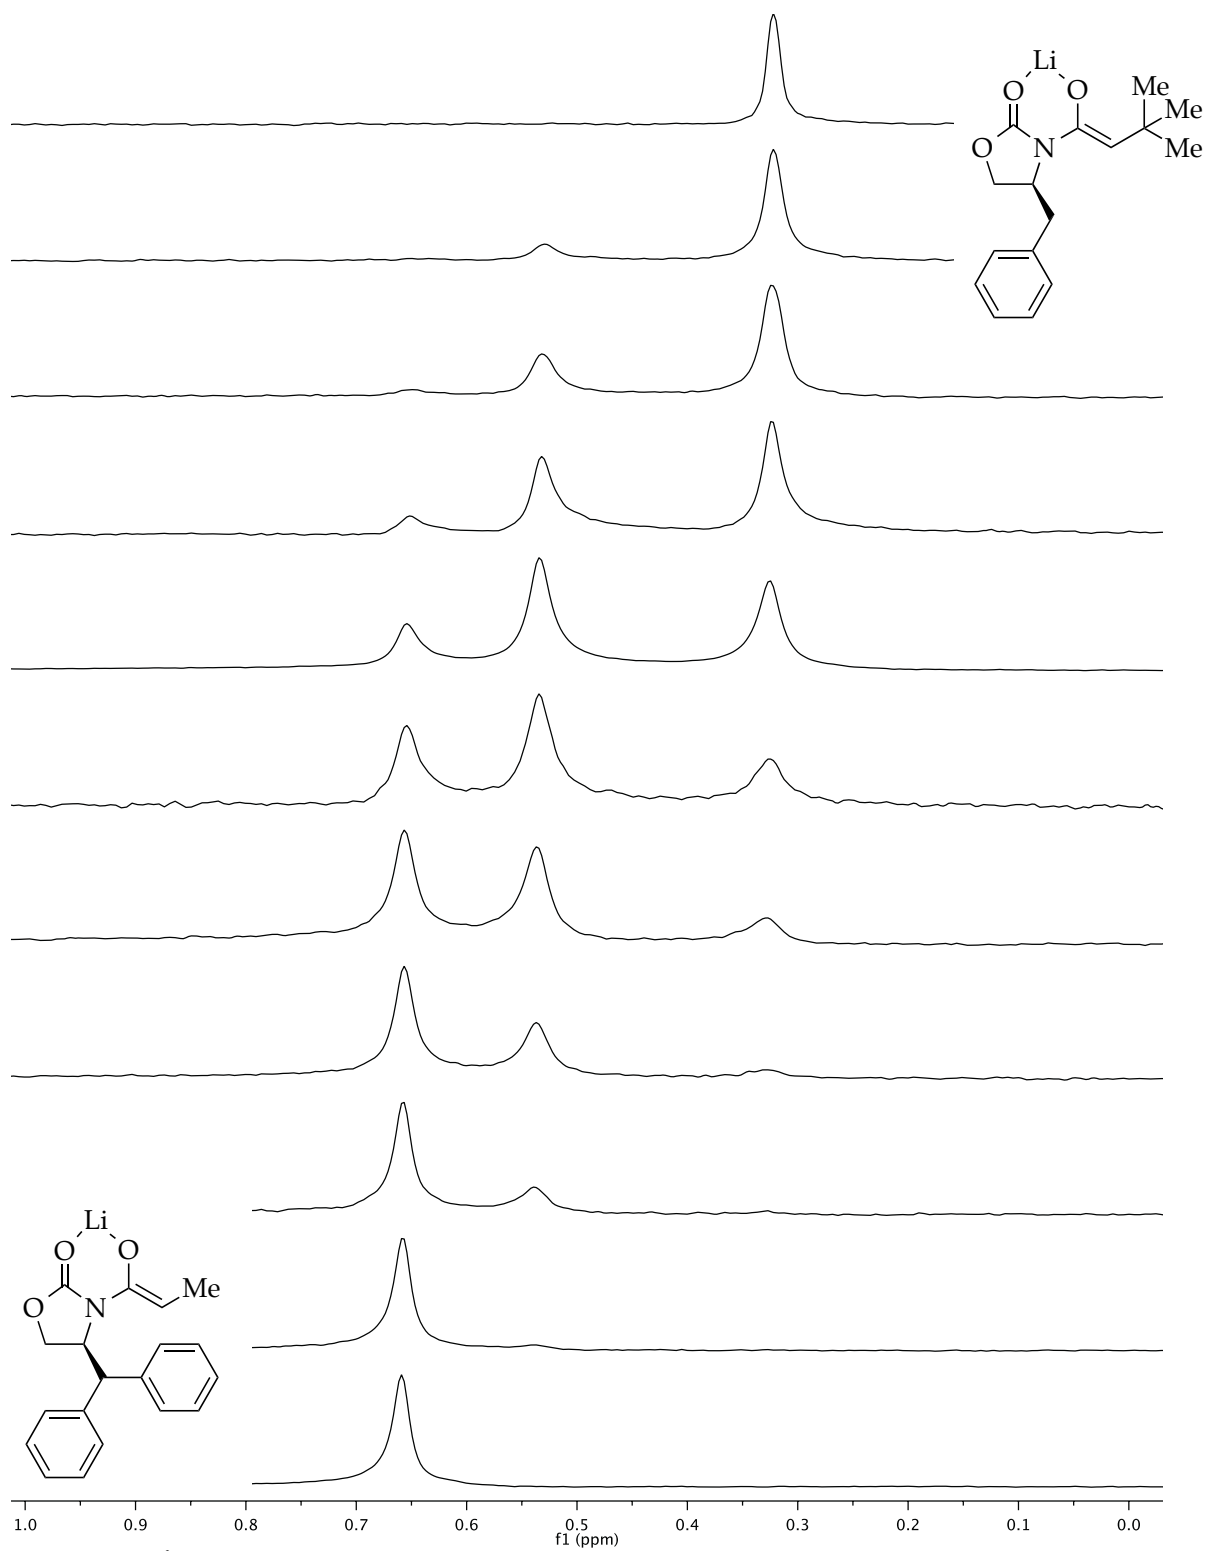

**Figure 14.**  $^6\text{Li}$  NMR spectra of the method of continuous variation of 7 and 16 (0.10 M total oxazolidinone, 0.11 M  $[\text{}^6\text{Li}]\text{LDA}$ ) in neat THF at  $-80\text{ }^\circ\text{C}$ .

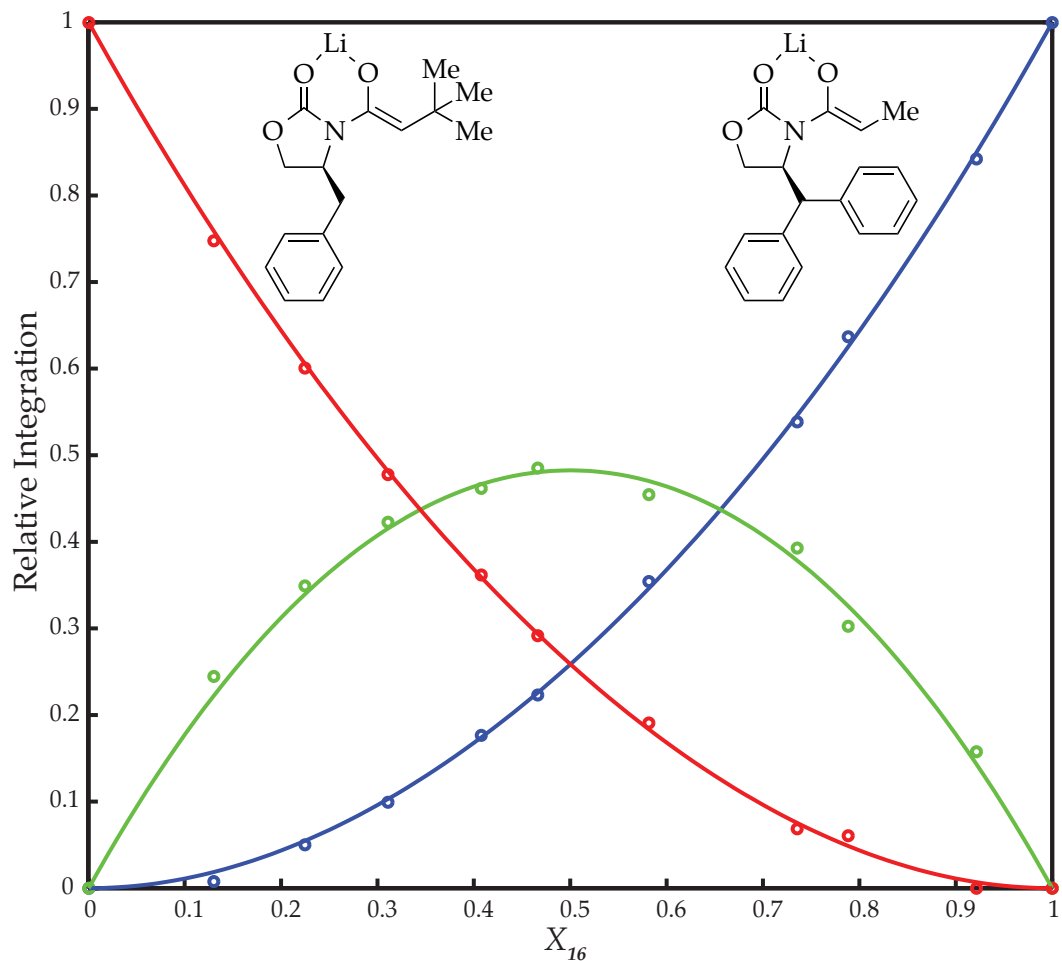

**Figure 15.** Job plot of **7** and **16** (0.10 M total oxazolidinone, 0.11 M [<sup>6</sup>Li]LDA) in neat THF at -80 °C. The relative integrations of the homoaggregates and the heteroaggregate are plotted as a function of the mole fraction of **16**.

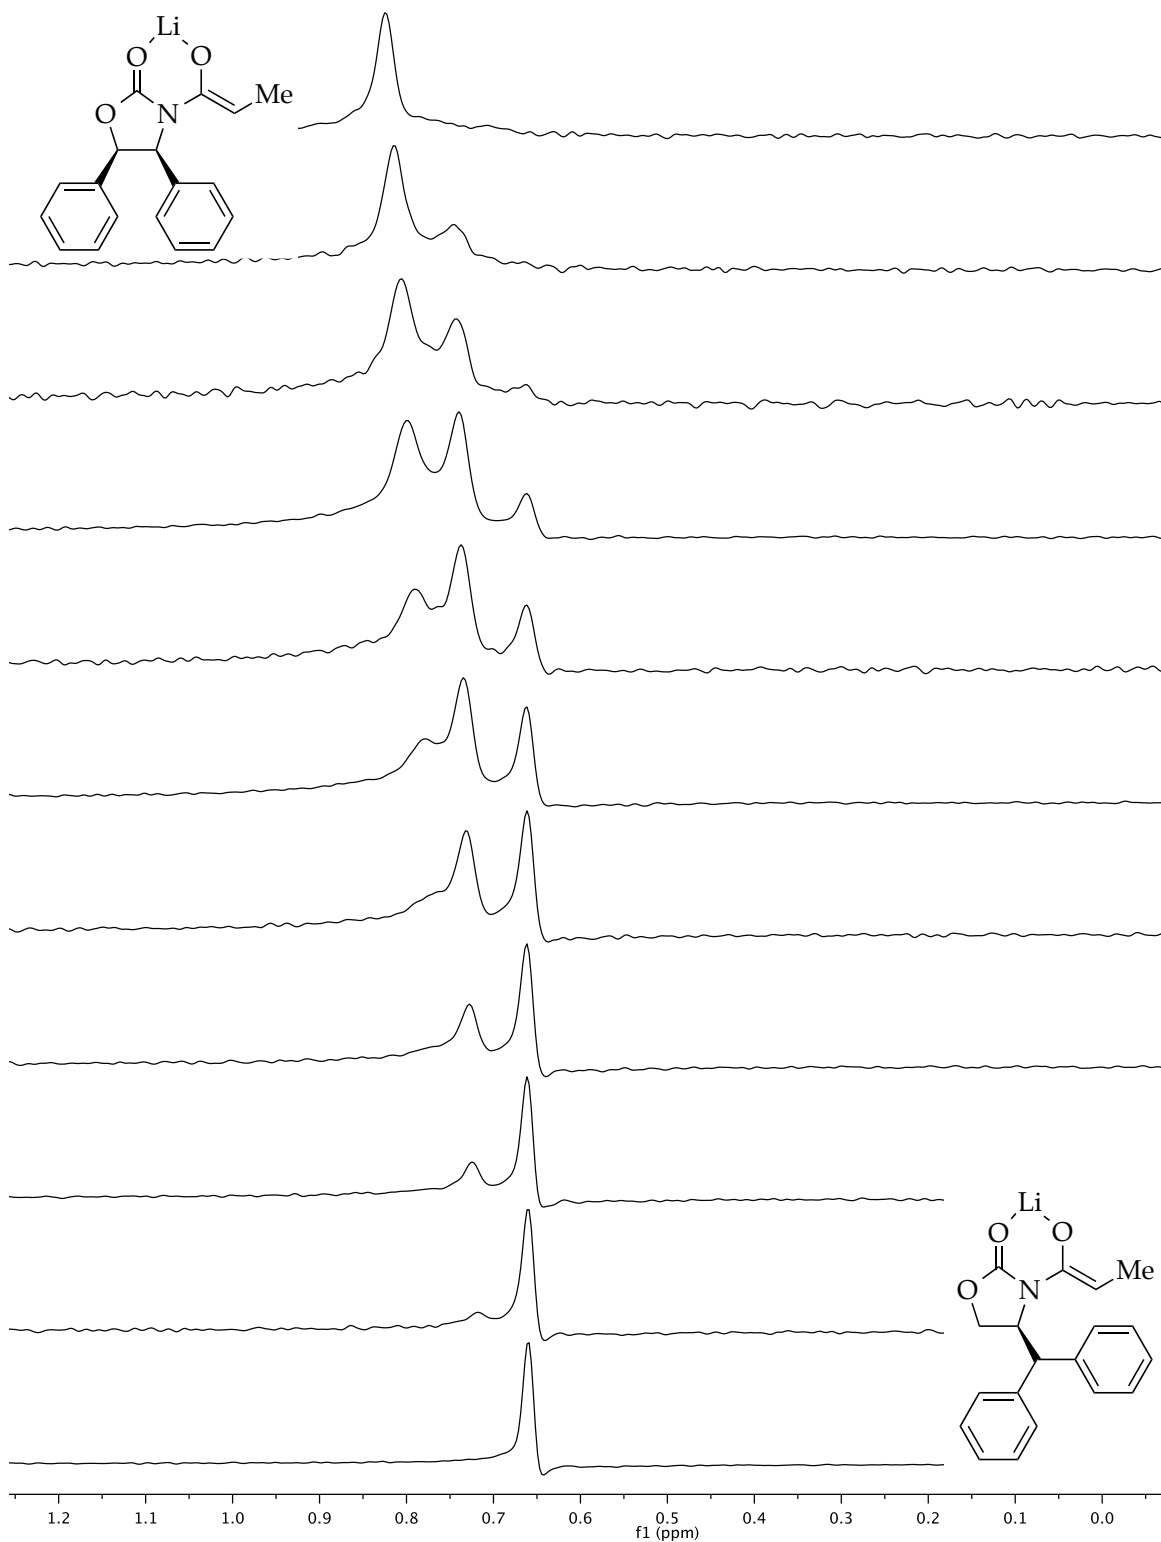

**Figure 16.**  $^6\text{Li}$  NMR spectra of the method of continuous variation of **15** and **16** (0.10 M total oxazolidinone, 0.11 M  $[\text{}^6\text{Li}]\text{LDA}$ ) in neat THF at  $-80\text{ }^\circ\text{C}$ .

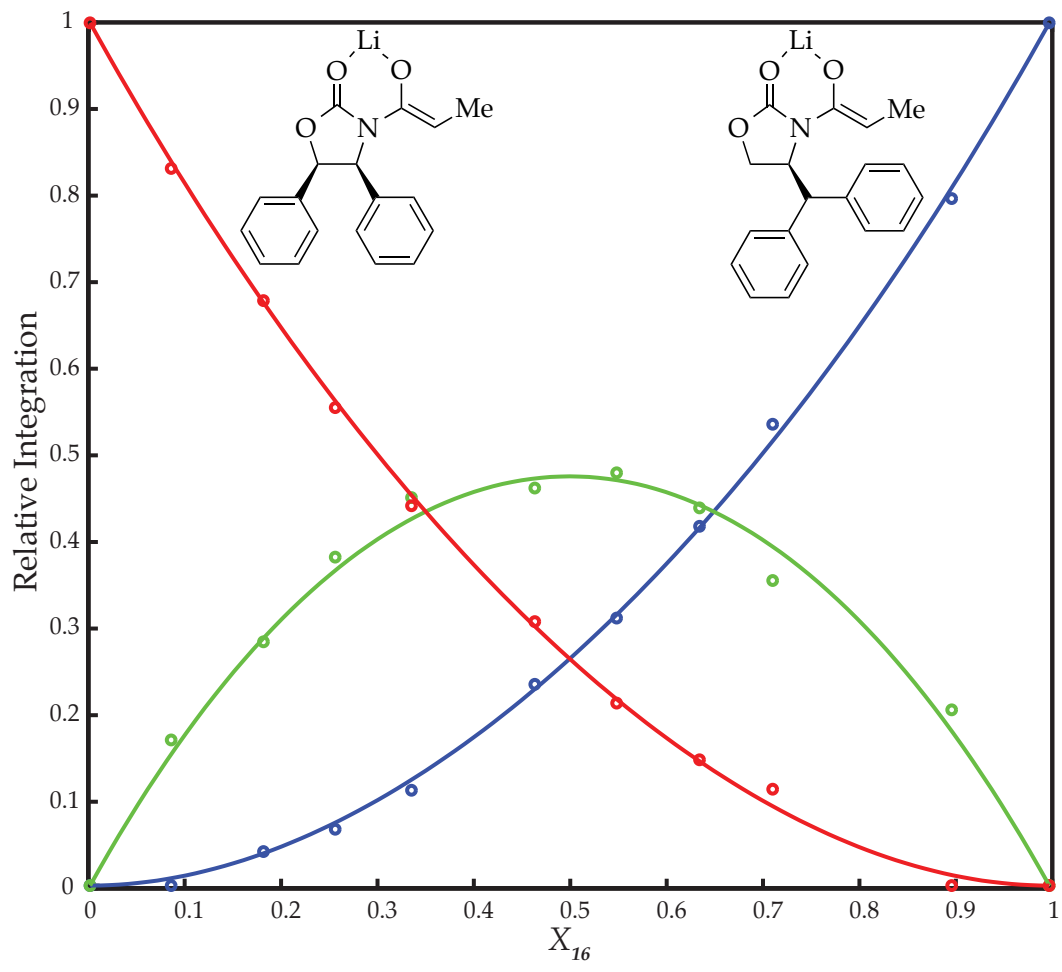

**Figure 17.** Job plot of **15** and **16** (0.10 M total oxazolidinone, 0.11 M [<sup>6</sup>Li]LDA) in neat THF at -80 °C. The relative integrations of the homoaggregates and the heteroaggregate are plotted as a function of the mole fraction of **16**.

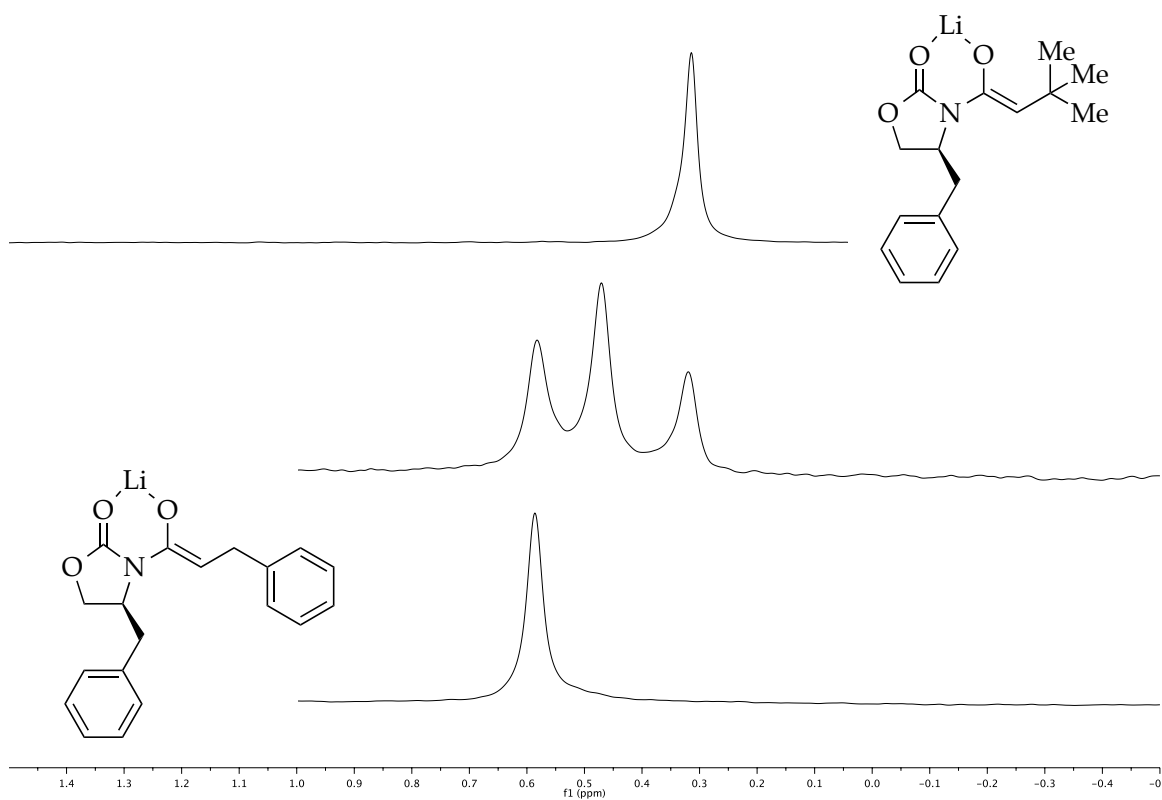

**Figure 18.**  $^6\text{Li}$  NMR spectra of the method of continuous variation of 7 and 8 (0.10 M total oxazolidinone, 0.11 M [ $^6\text{Li}$ ]LDA) in neat THF at  $-80\text{ }^\circ\text{C}$ .



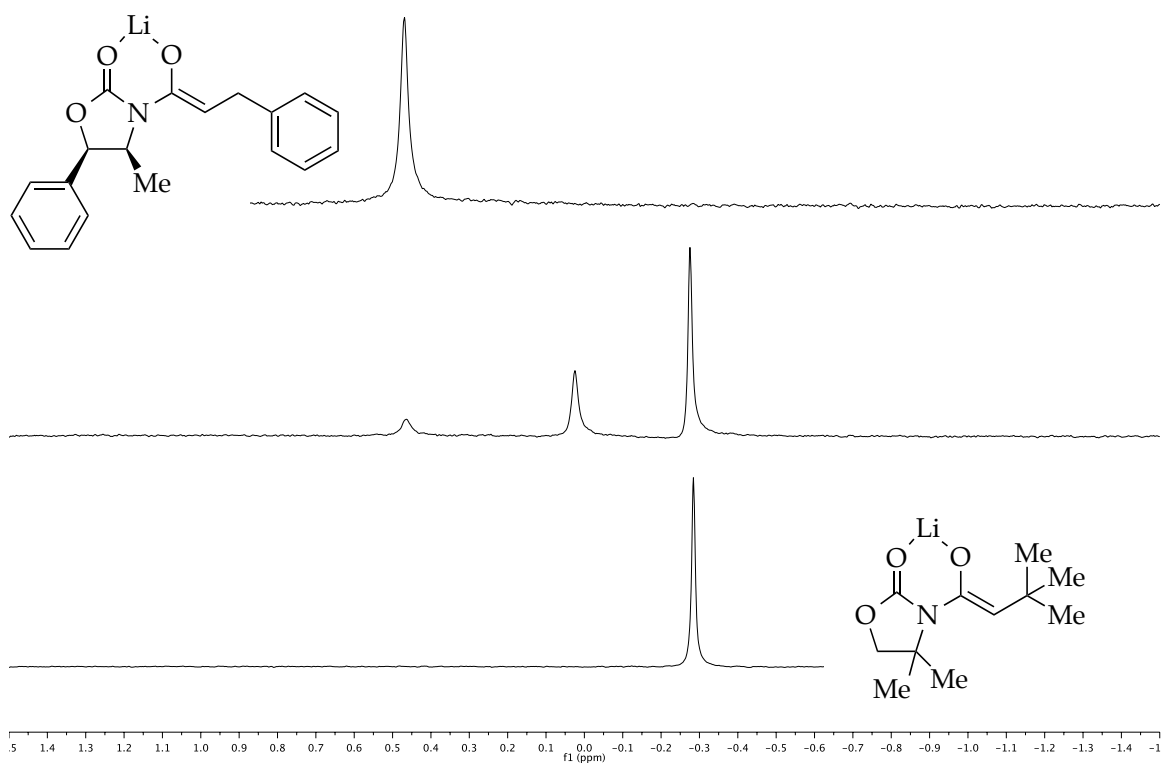

**Figure 19.**  $^6\text{Li}$  NMR spectra of the method of continuous variation of **12** and **18** (0.10 M total oxazolidinone, 0.11 M  $[\text{}^6\text{Li}]\text{LDA}$ ) in neat THF at  $-80^\circ\text{C}$ .

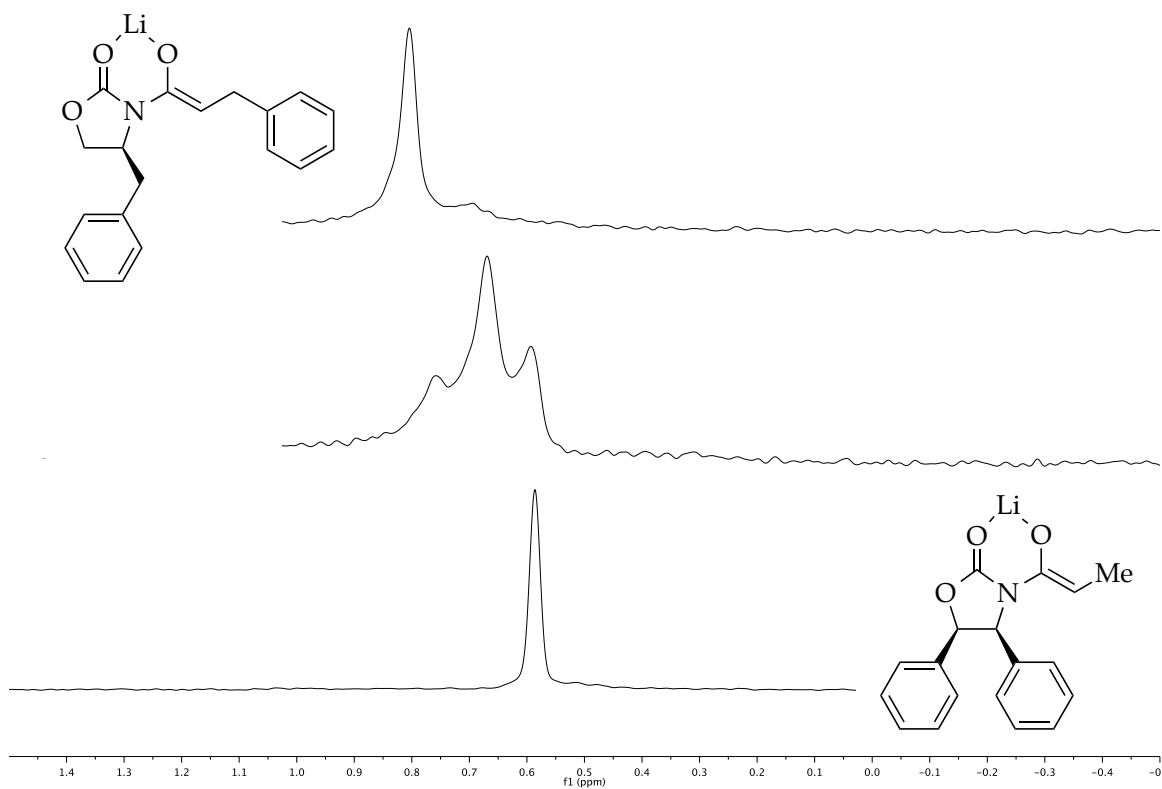

**Figure 20.**  $^6\text{Li}$  NMR spectra of the method of continuous variation of **8** and **15** (0.10 M total oxazolidinone, 0.11 M [ $^6\text{Li}$ ]LDA) in neat THF at  $-80\text{ }^\circ\text{C}$ .

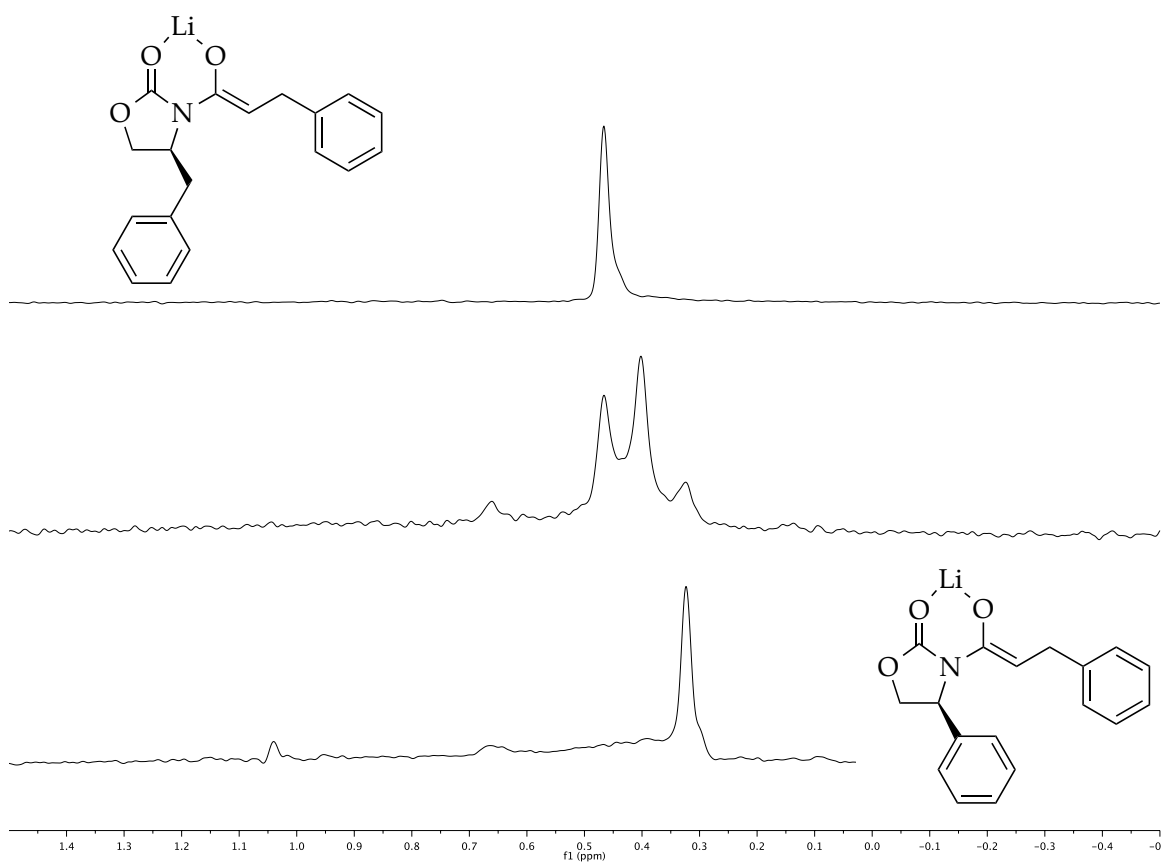

**Figure 21.**  $^6\text{Li}$  NMR spectra of the method of continuous variation of **8** and **17** (0.10 M total oxazolidinone, 0.11 M [ $^6\text{Li}$ ]LDA) in neat THF at  $-80\text{ }^\circ\text{C}$ .

## Part 2: Uncharacterized/oligomerized substrates

---

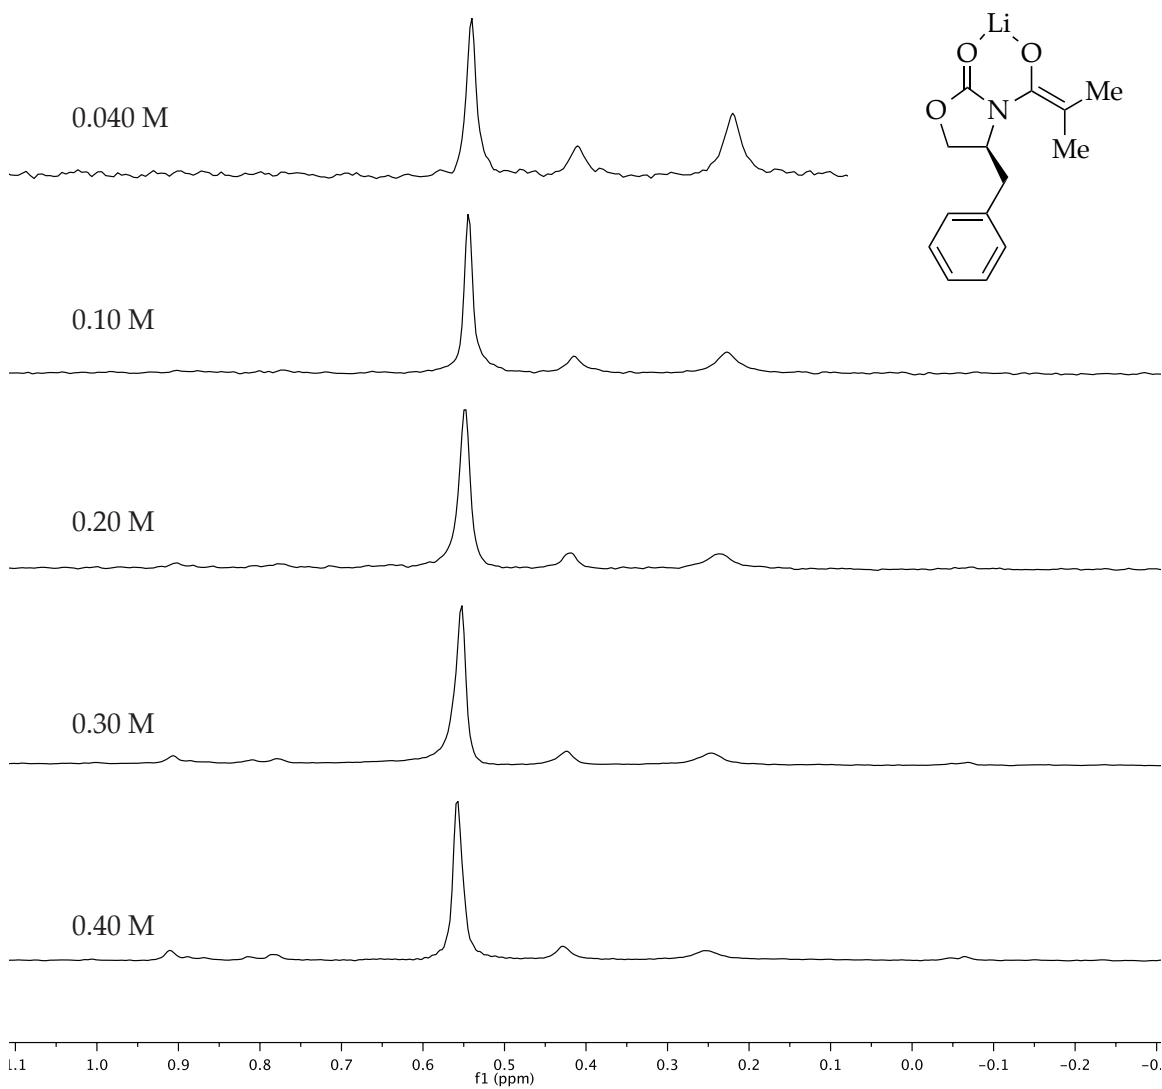

**Figure 22.**  $^6\text{Li}$  NMR spectra of changing concentration of **22** in neat THF at  $-80^\circ\text{C}$ .

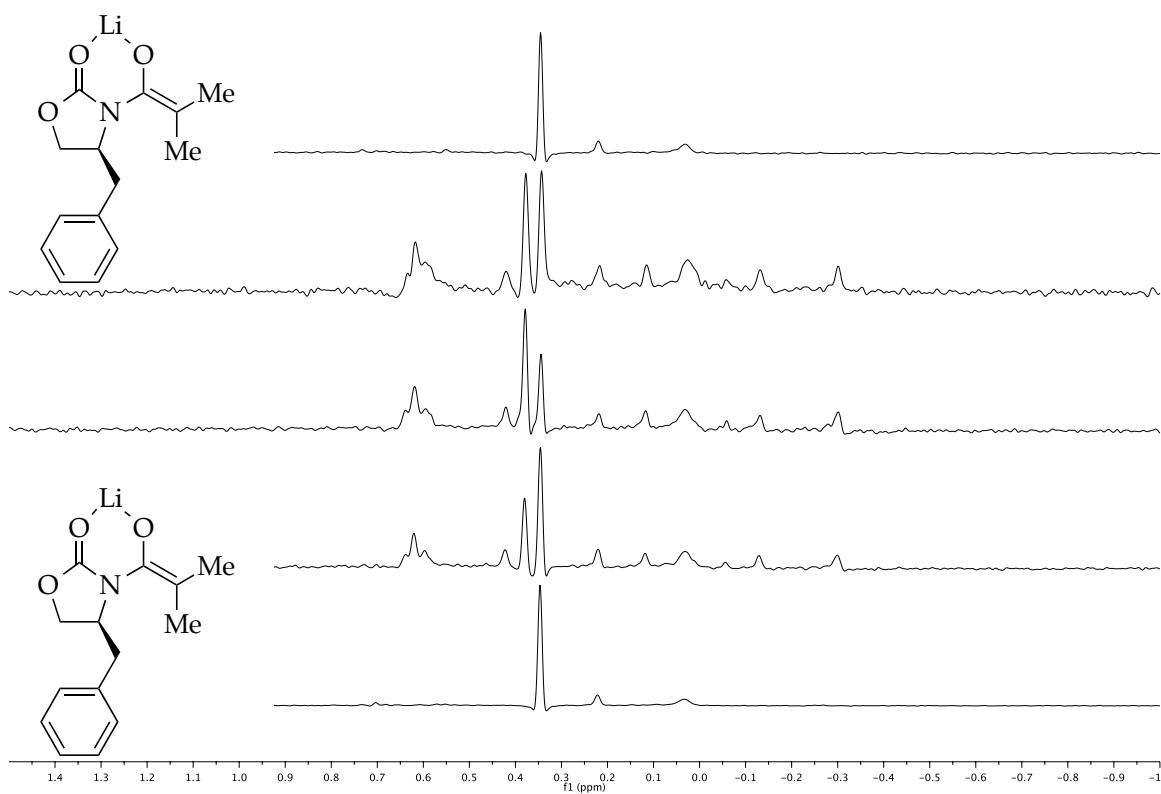

**Figure 23.**  $^6\text{Li}$  NMR spectra of the method of continuous variation of (S)-22 and (R)-22 (0.10 M total oxazolidinone, 0.11 M  $[\text{}^6\text{Li}]\text{LDA}$ ) in neat THF at  $-80\text{ }^\circ\text{C}$ .

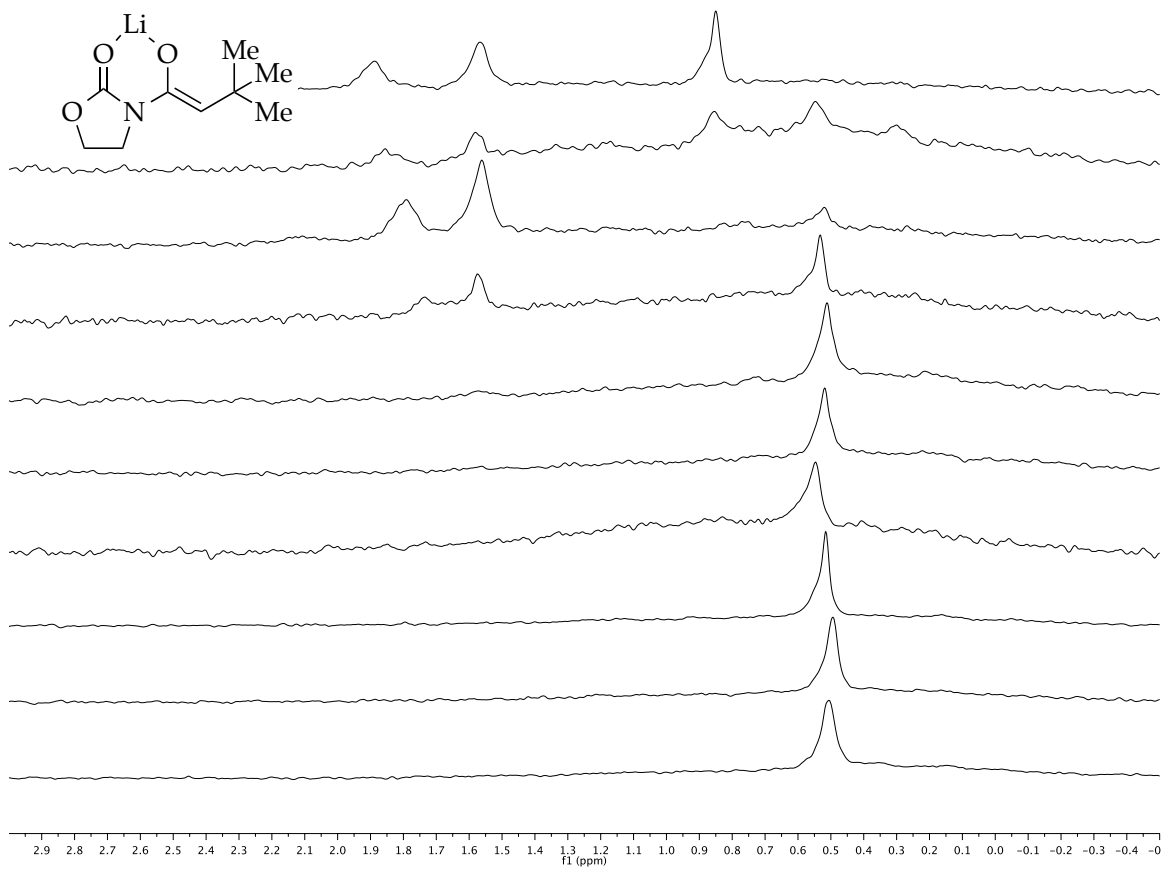

**Figure 24.**  $^6\text{Li}$  NMR spectra of changing THF equivalents (0 to 15) with toluene cosolvent of **33** (0.10 M oxazolidinone, 0.11 M [ $^6\text{Li}$ ]LDA) at  $-80\text{ }^\circ\text{C}$ .

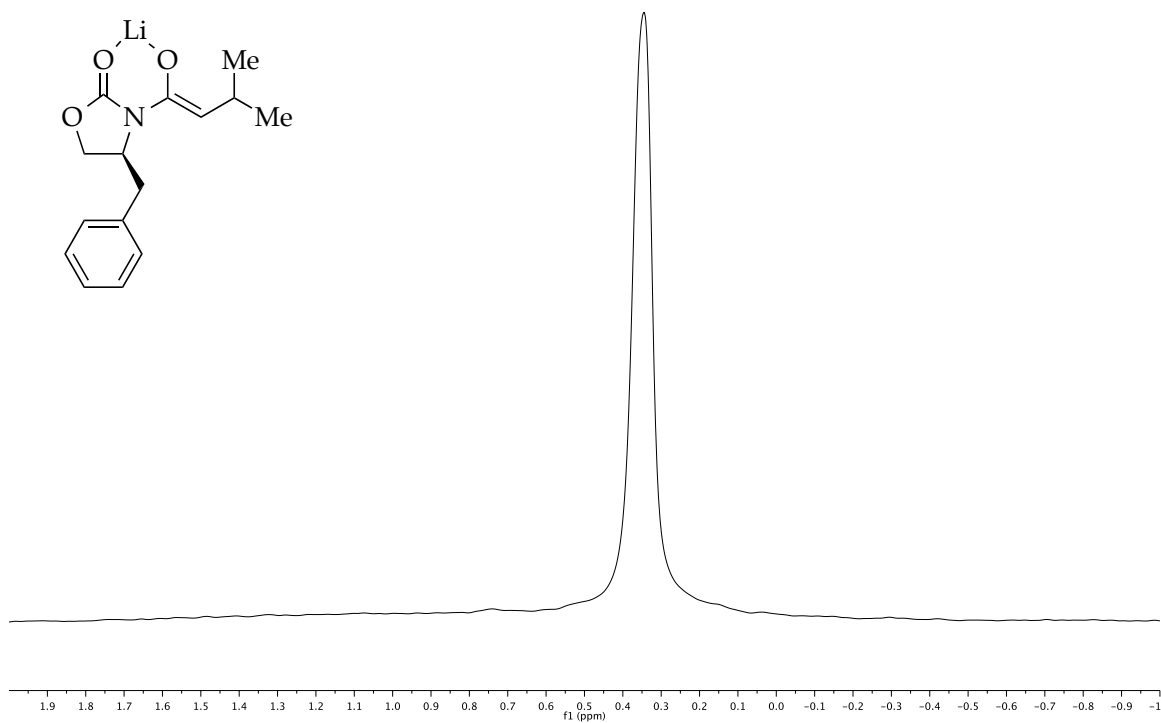

**Figure 25.**  $^6\text{Li}$  NMR spectrum of **23** (0.10 M oxazolidinone, 0.11 M [ $^6\text{Li}$ ]LDA) in THF at  $-80\text{ }^\circ\text{C}$ .

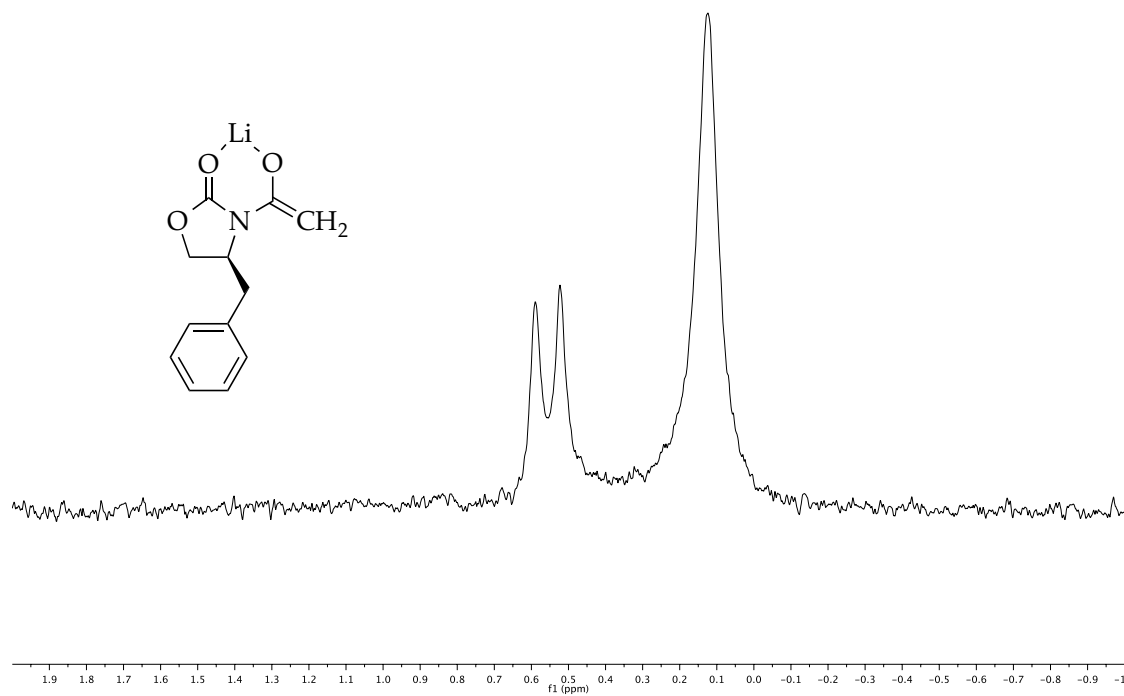

**Figure 26.** <sup>6</sup>Li NMR spectrum of **24** (0.10 M oxazolidinone, 0.11 M [<sup>6</sup>Li<sup>15</sup>N]LDA) in THF at -80 °C, unaged.



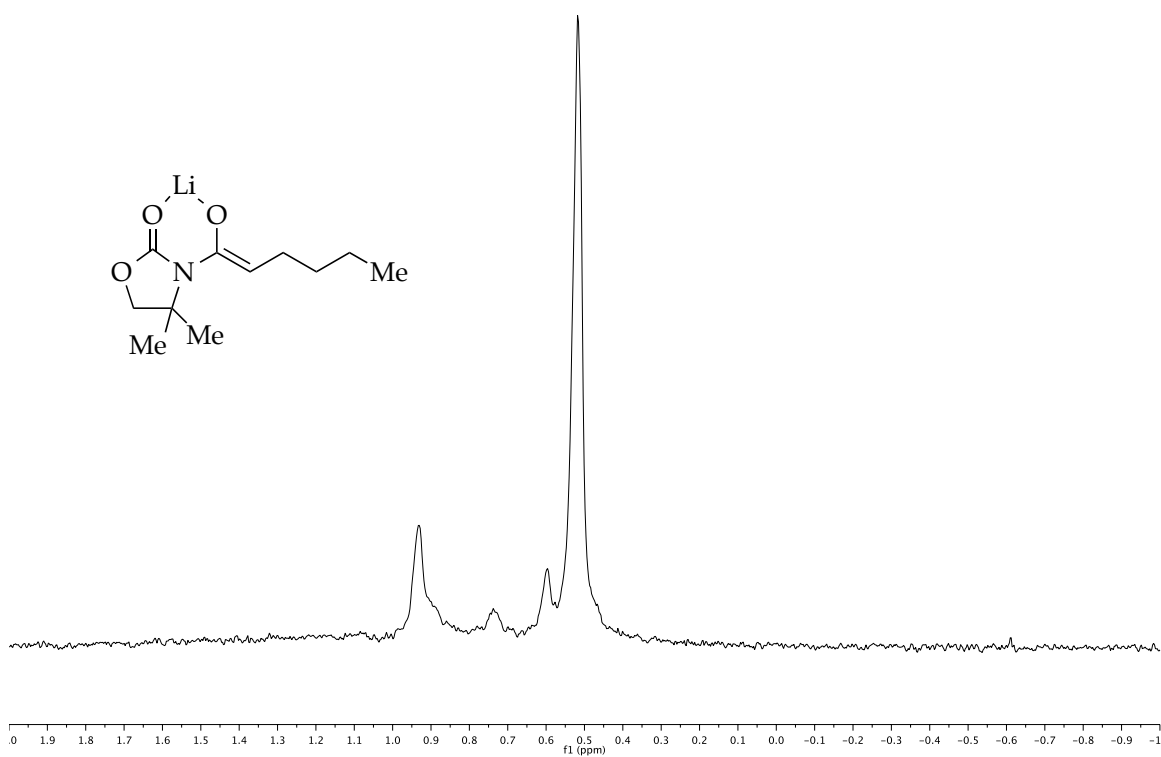

**Figure 27.**  $^6\text{Li}$  NMR spectrum of **25** (0.10 M oxazolidinone, 0.11 M [ $^6\text{Li}^{15}\text{N}$ ]LDA) in THF at  $-80\text{ }^\circ\text{C}$ .

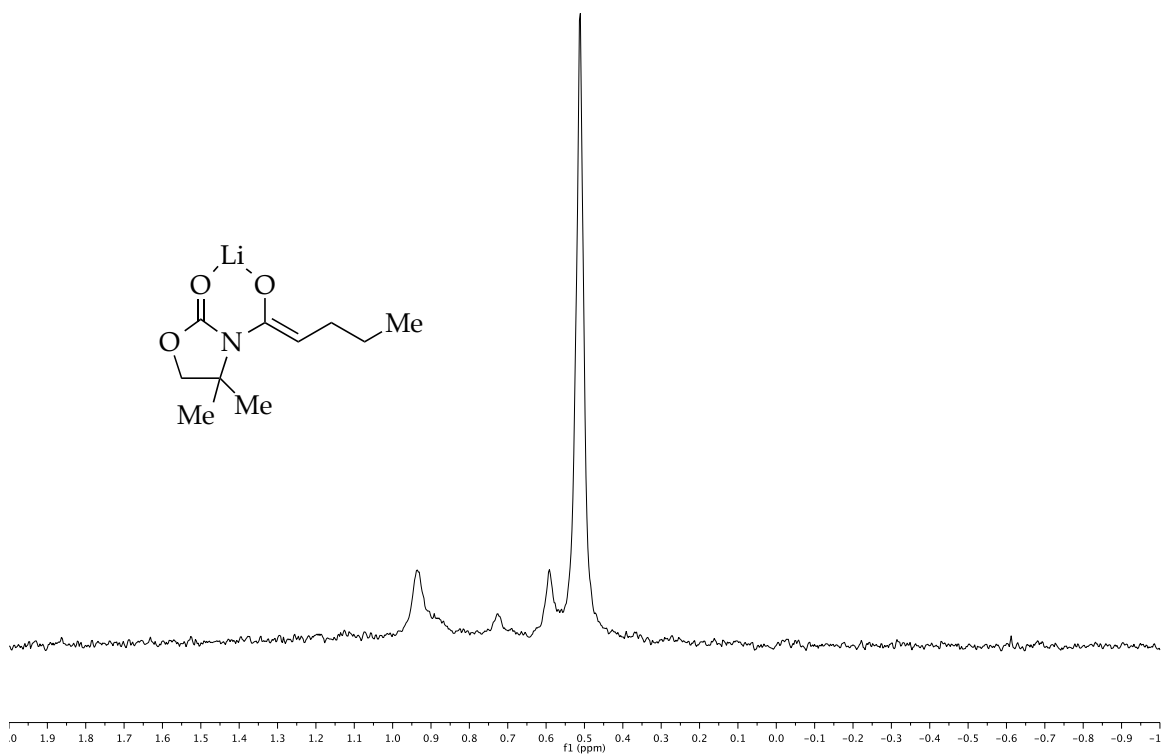

**Figure 28.**  $^6\text{Li}$  NMR spectrum of **26** (0.10 M oxazolidinone, 0.11 M [ $^6\text{Li}^{15}\text{N}$ ]LDA) in THF at  $-80\text{ }^\circ\text{C}$ .

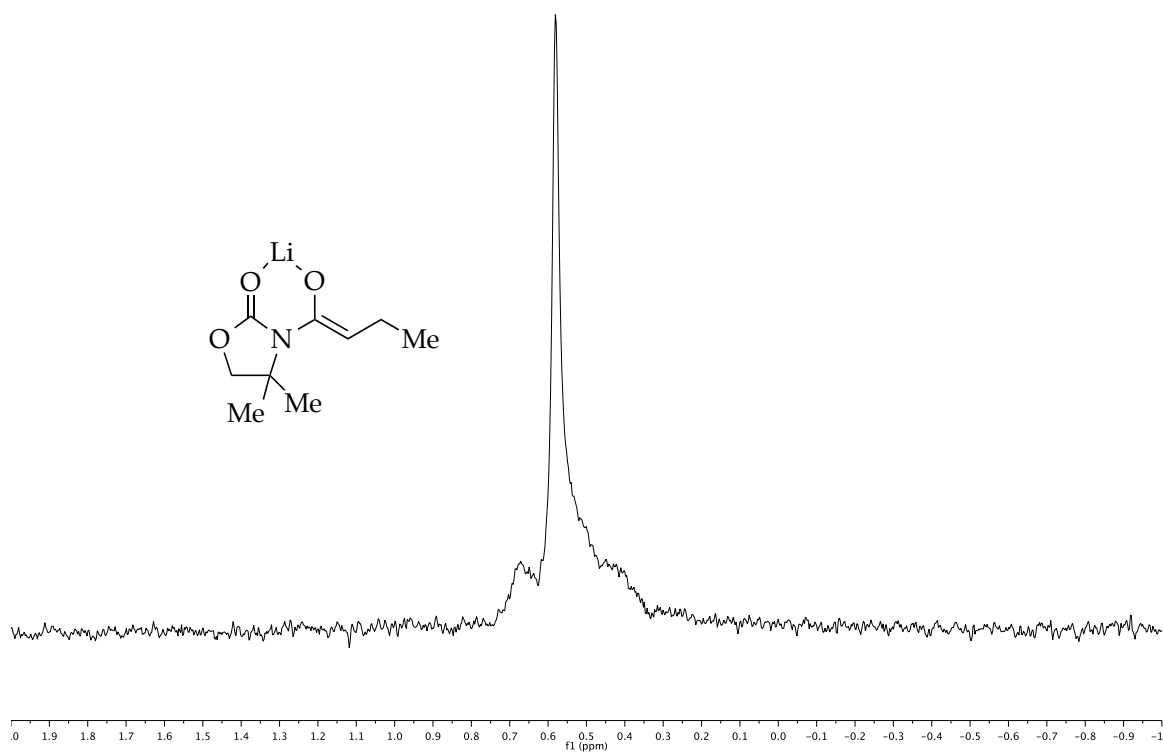

**Figure 29.**  $^6\text{Li}$  NMR spectrum of **27** (0.10 M oxazolidinone, 0.11 M [ $^6\text{Li}^{15}\text{N}$ ]LDA) in THF at  $-80\text{ }^\circ\text{C}$ .

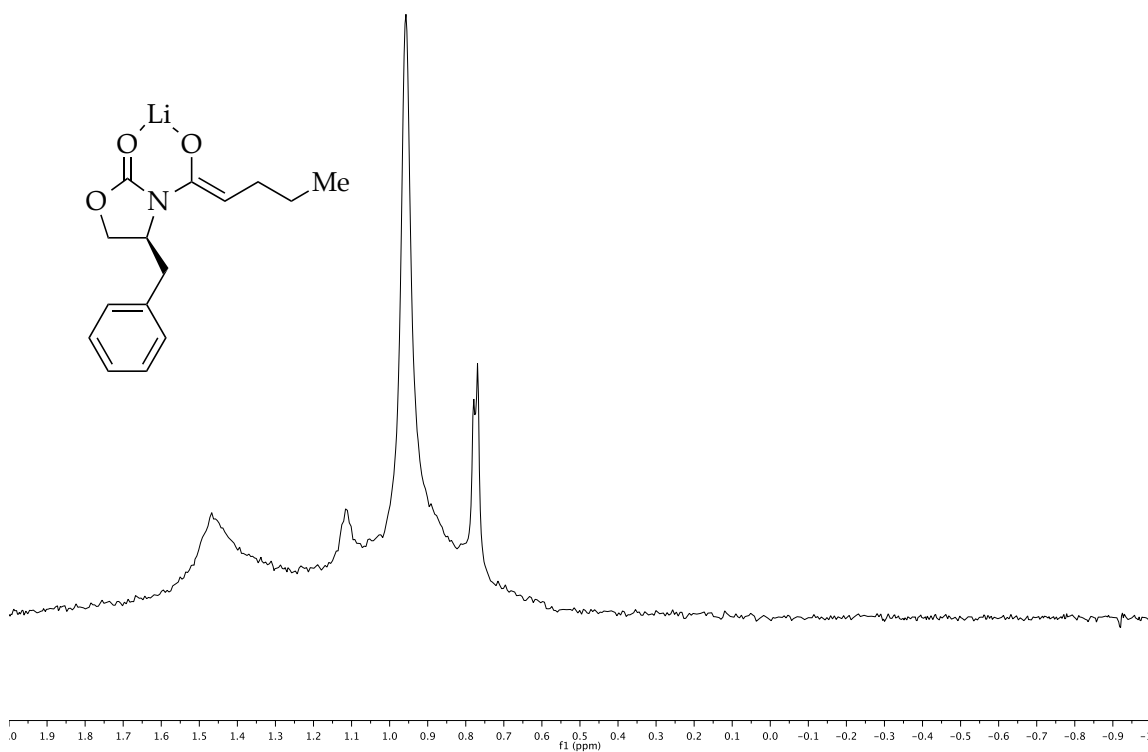

**Figure 30.**  $^6\text{Li}$  NMR spectrum of **28** (0.10 M oxazolidinone, 0.11 M [ $^6\text{Li}^{15}\text{N}$ ]LDA) in THF at  $-80\text{ }^\circ\text{C}$ .

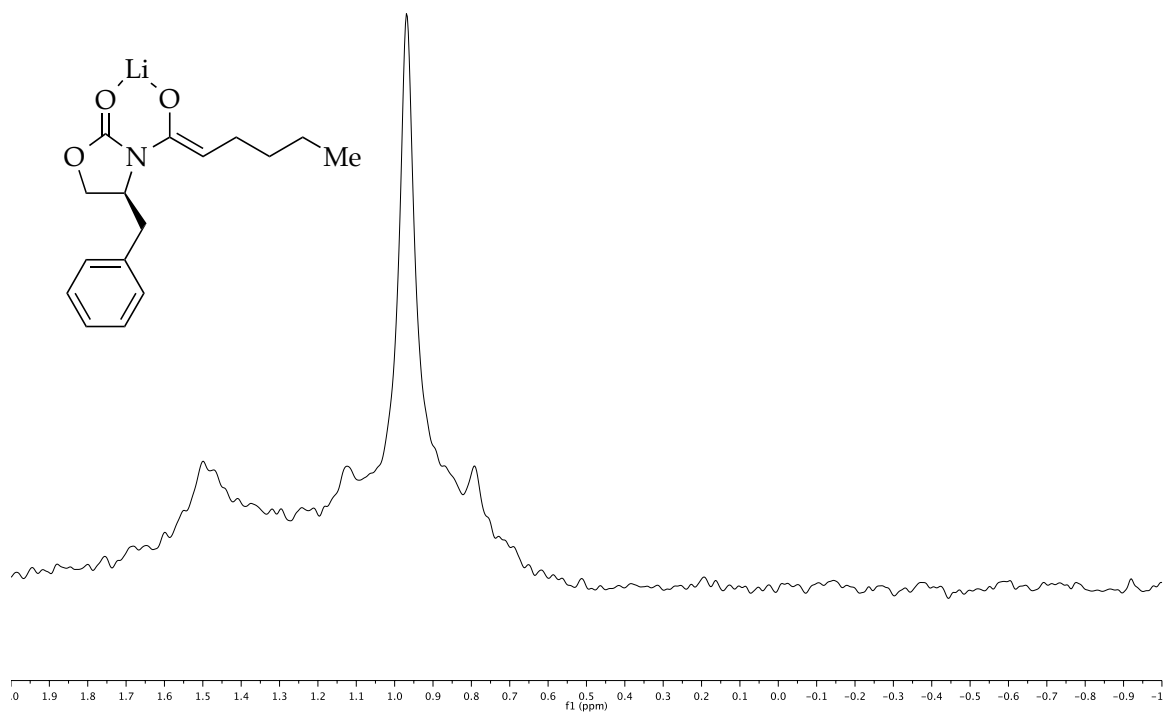

**Figure 31.**  $^6\text{Li}$  NMR spectrum of **29** (0.10 M oxazolidinone, 0.11 M [ $^6\text{Li}^{15}\text{N}$ ]LDA) in THF at  $-80\text{ }^\circ\text{C}$ .

### Part 3: Solvation Studies of 5 and 6

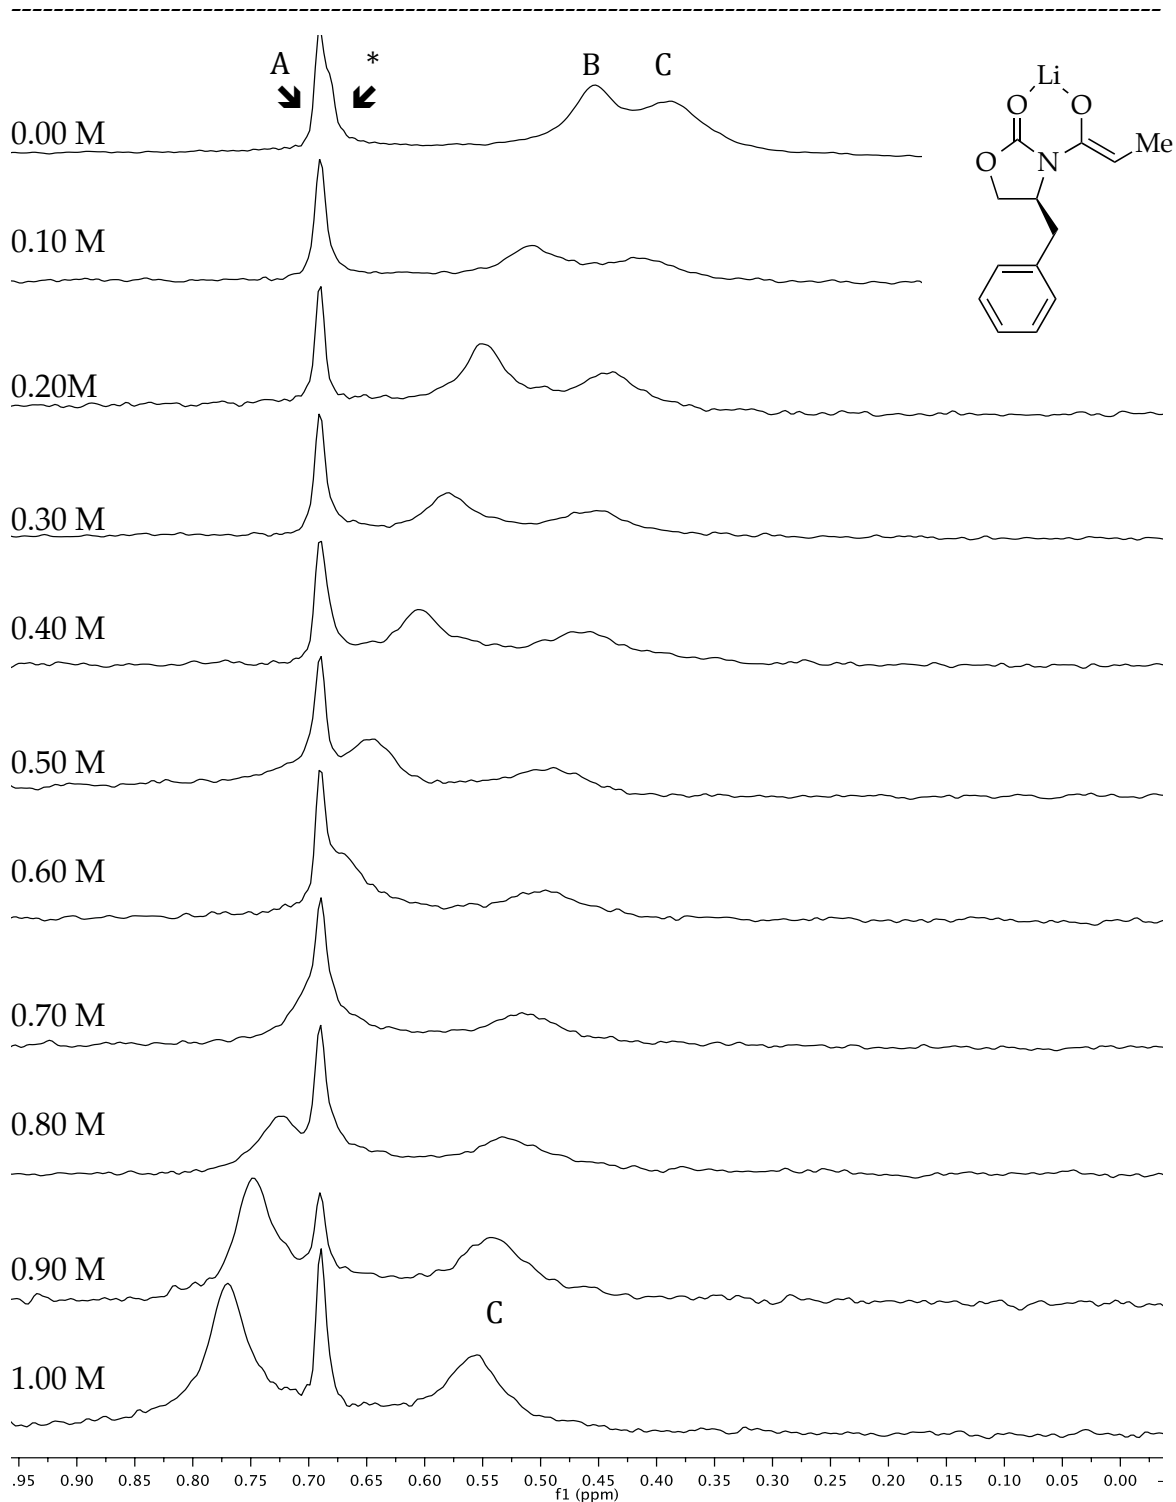

**Figure 32.**  $^6\text{Li}$  NMR spectra of 5 (0.10 M oxazolidinone, 0.10 M  $^6\text{Li}$ ]LDA) with varying pyridine concentrations (as labeled) in THF at  $-80^\circ\text{C}$ . **A** is the unsolvated tetramer; **B** and **C** are the trisolvated dimers. The mixed aggregate is denoted by \*.

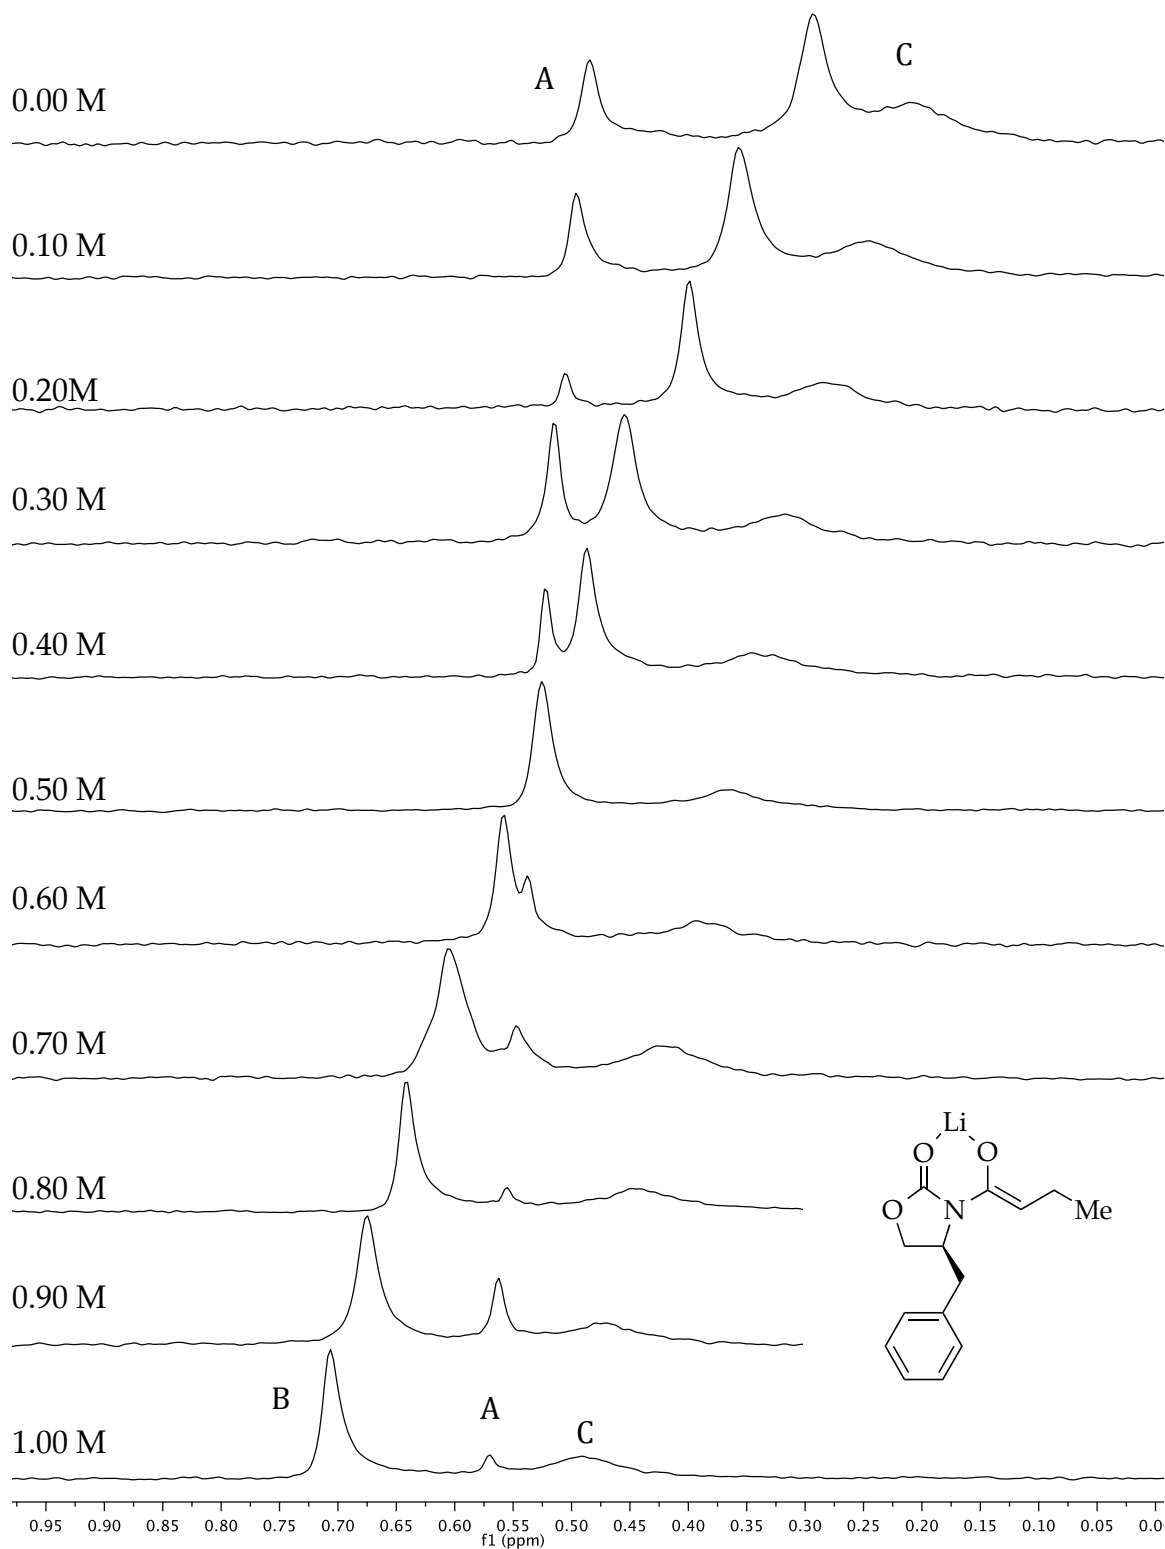

**Figure 33.**  $^6\text{Li}$  NMR spectra of **6** ( $0.10\text{ M}$  oxazolidinone,  $0.10\text{ M}$   $[\text{Li}]\text{LDA}$ ) with varying pyridine concentrations (as labeled) in THF at  $-80^\circ\text{C}$ . **A** is the unsolvated tetramer; **B** and **C** are the trisolvated dimers.

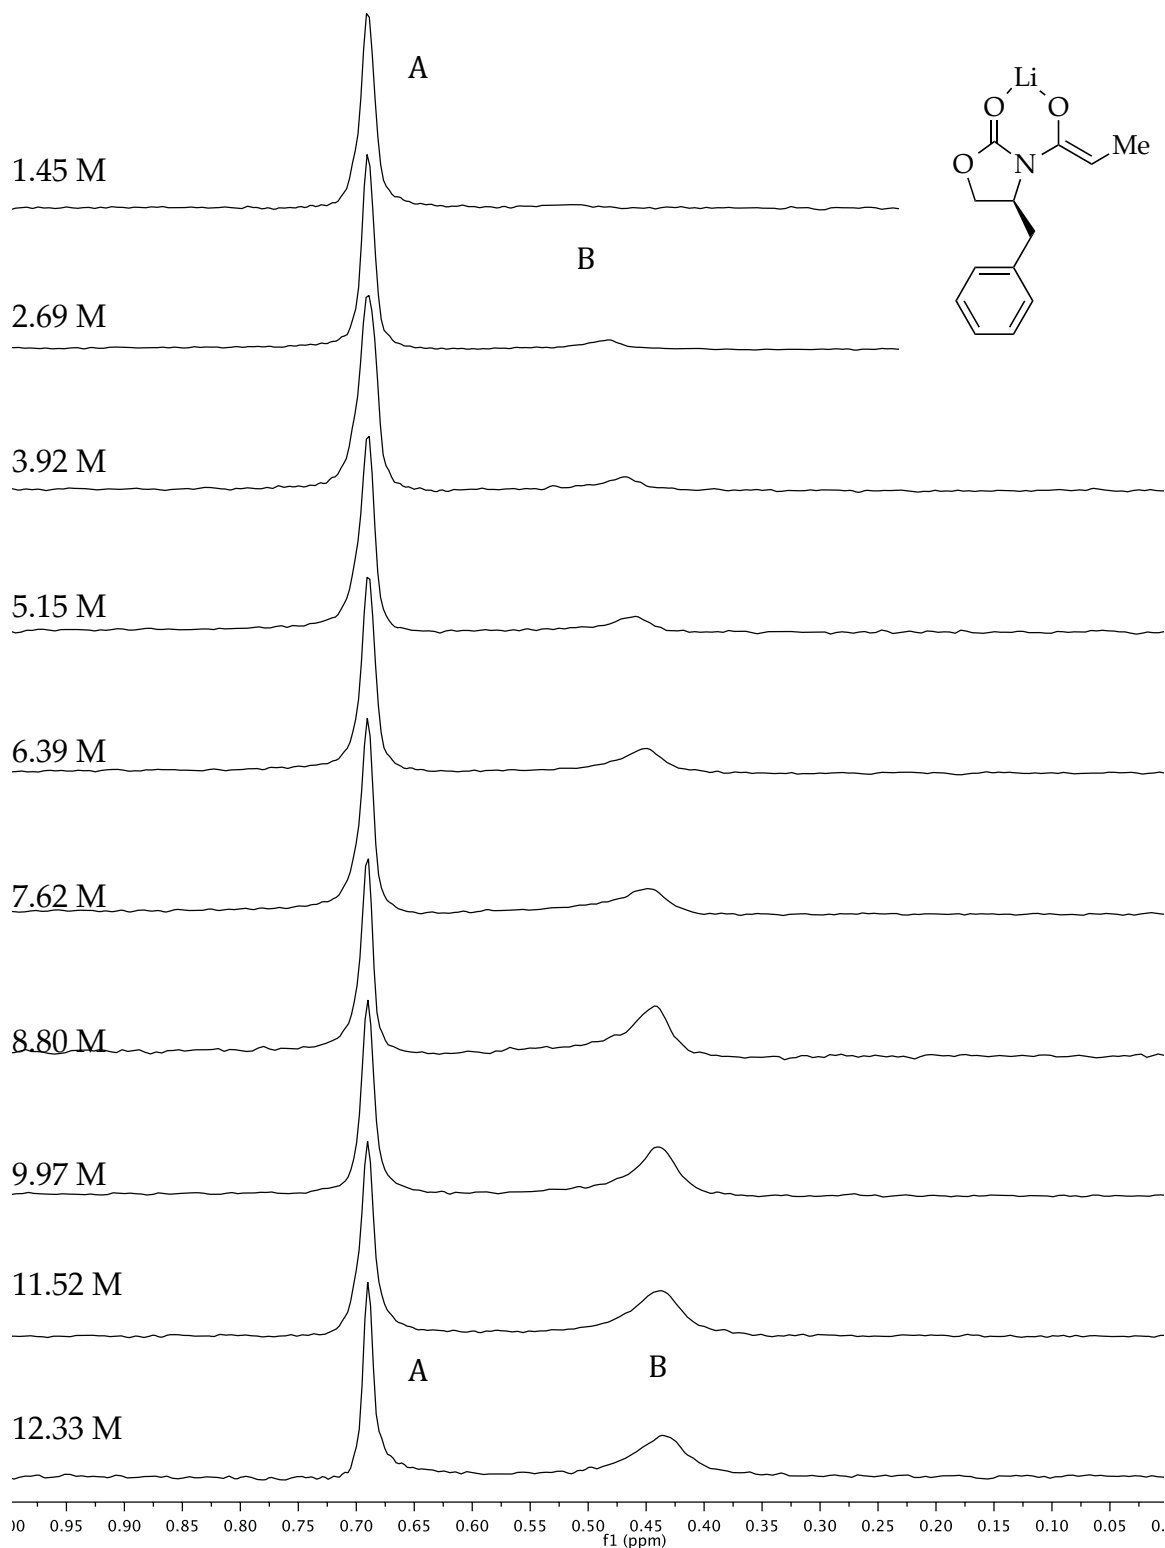

**Figure 34.**  $^6\text{Li}$  NMR spectra of **5** (0.10 M oxazolidinone, 0.10 M  $[\text{}^6\text{Li}]\text{LDA}$ ) with varying THF concentrations (as labeled) in toluene at  $-60\text{ }^\circ\text{C}$ . **A** is the unsolvated tetramer; **B** is the coalesced trisolvated dimers.



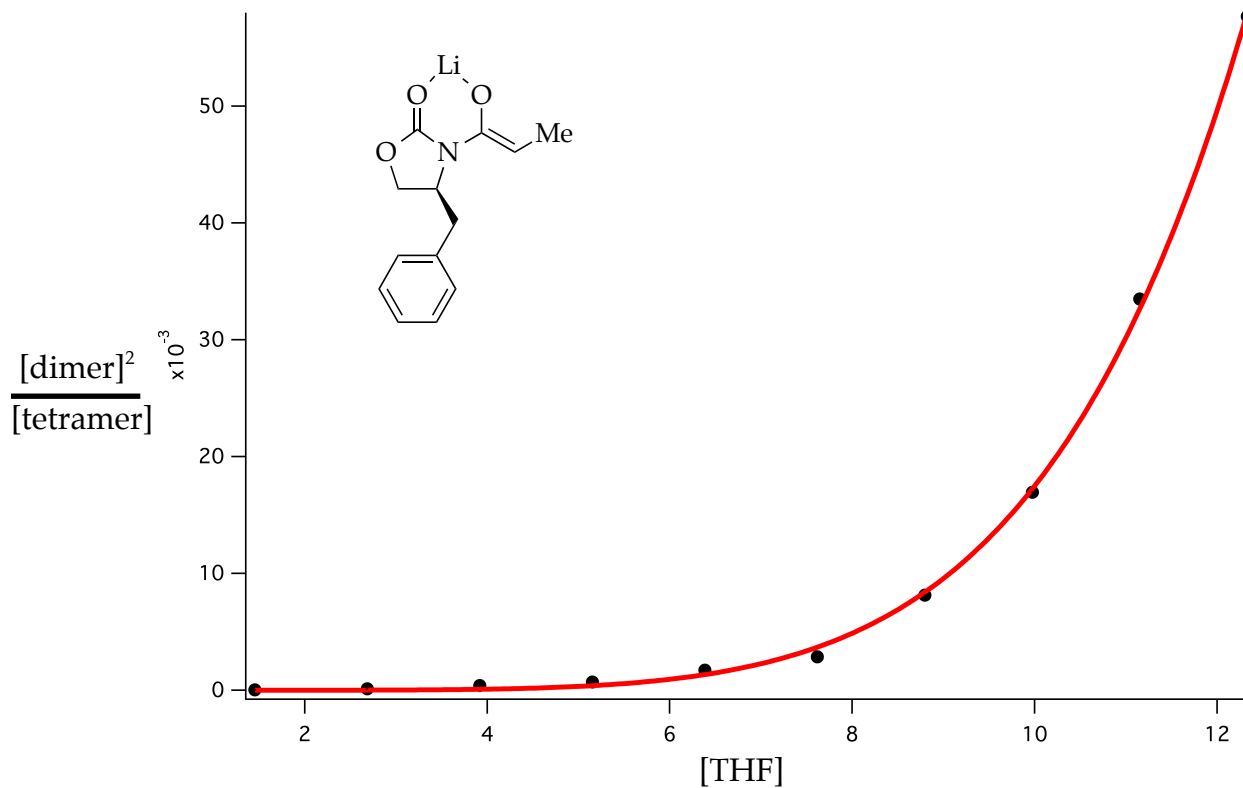

**Figure 35.** Fit of aggregate concentration vs. changing THF concentration for **5** to determine the dimer solvation at  $-60\text{ }^{\circ}\text{C}$ . The best fit, in red, gives a solvation of the dimer peak of  $2.86 \pm 0.04$ . The fitting equation was  $Y=(X^{2n})/k$ .

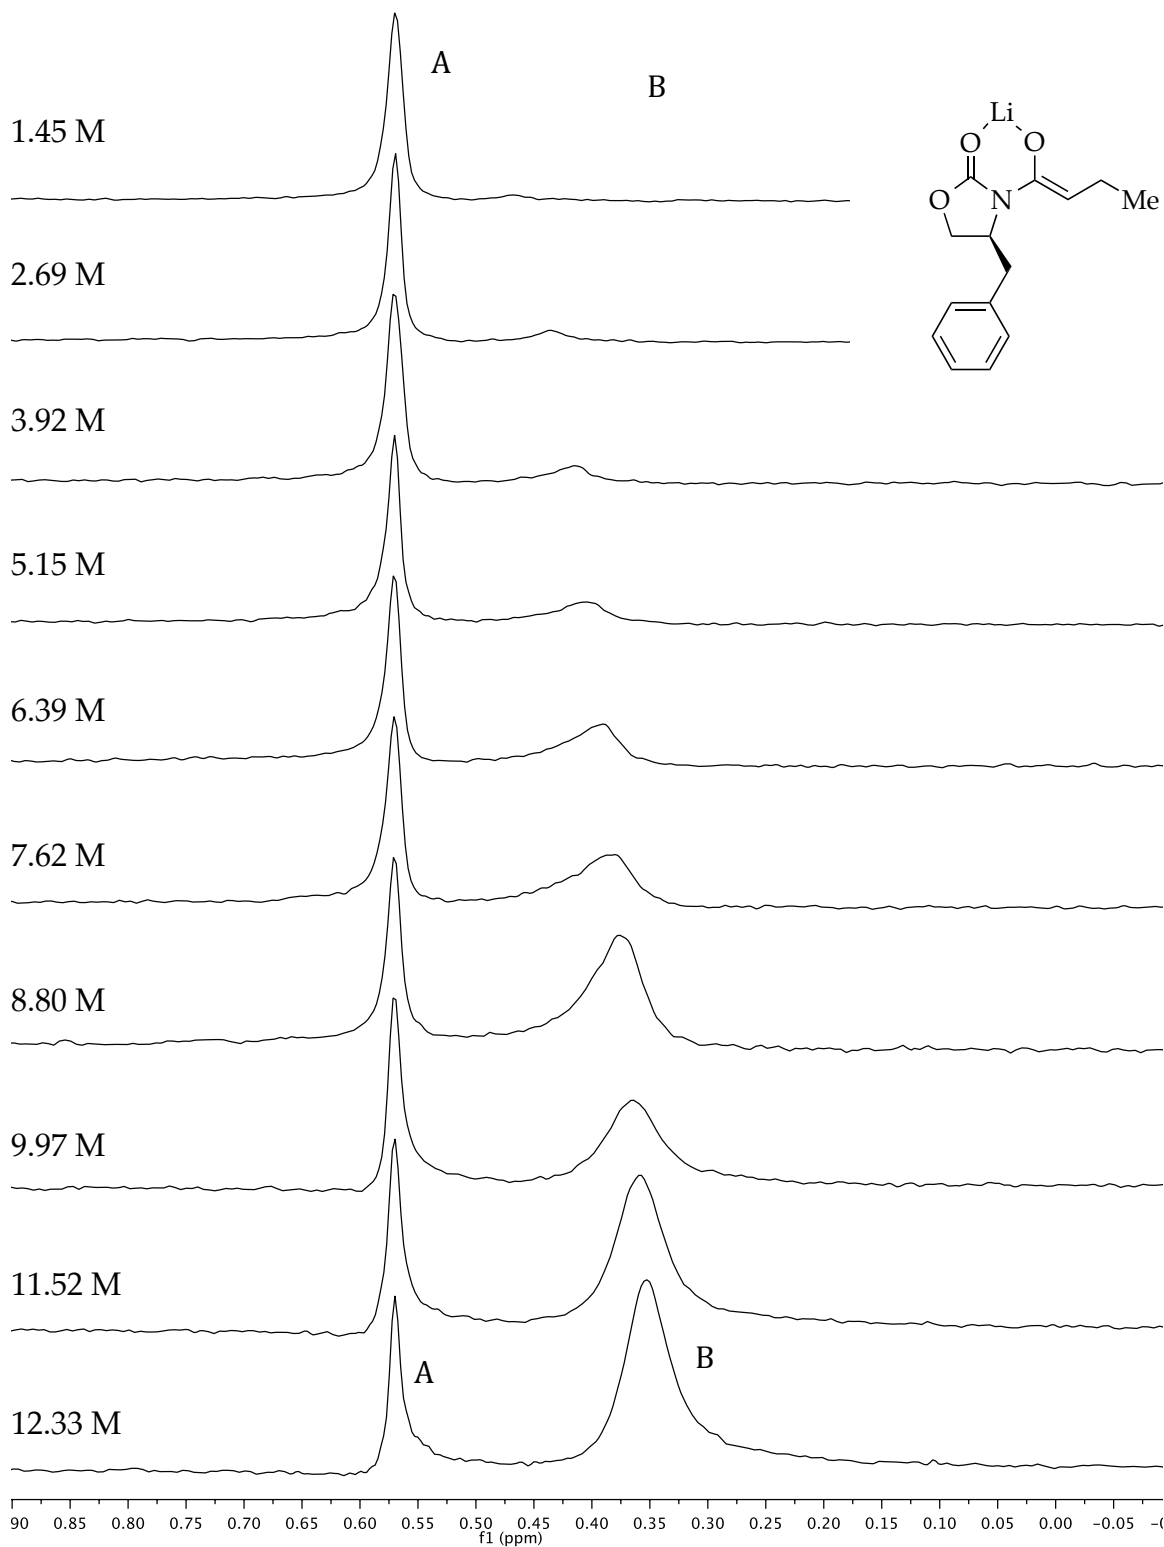

**Figure 36.**  ${}^6\text{Li}$  NMR spectra of **6** (0.10 M oxazolidinone, 0.10 M  $[{}^6\text{Li}]\text{LDA}$ ) with varying THF concentrations (as labeled) in toluene at  $-60\text{ }^\circ\text{C}$ . **A** is the unsolvated tetramer; **B** is the coalesced trisolvated dimers.

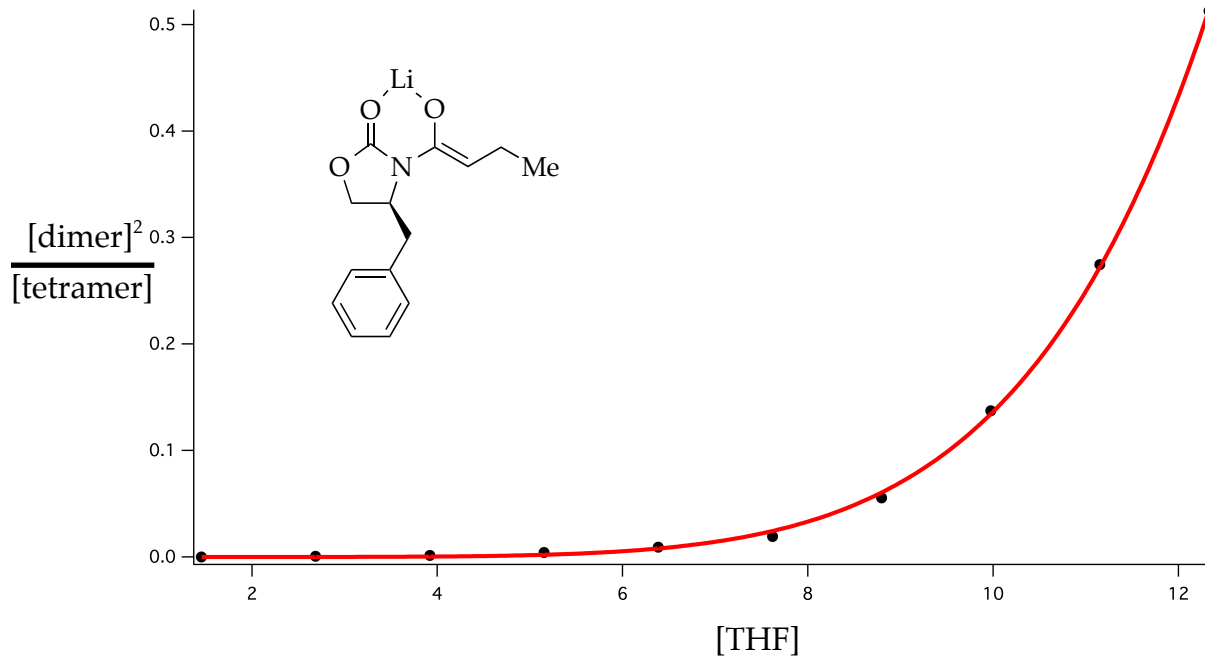

**Figure 37.** Fit of aggregate concentration vs. changing THF for **6** to determine dimer solvation at  $-40\text{ }^{\circ}\text{C}$ . The best fit, in red, gives a solvation of the dimer peak of  $3.17 \pm 0.03$ . The fitting equation was  $Y=(X^{2n})/k$ .

## Part 4: Aggregation Studies of 5 and 6

---

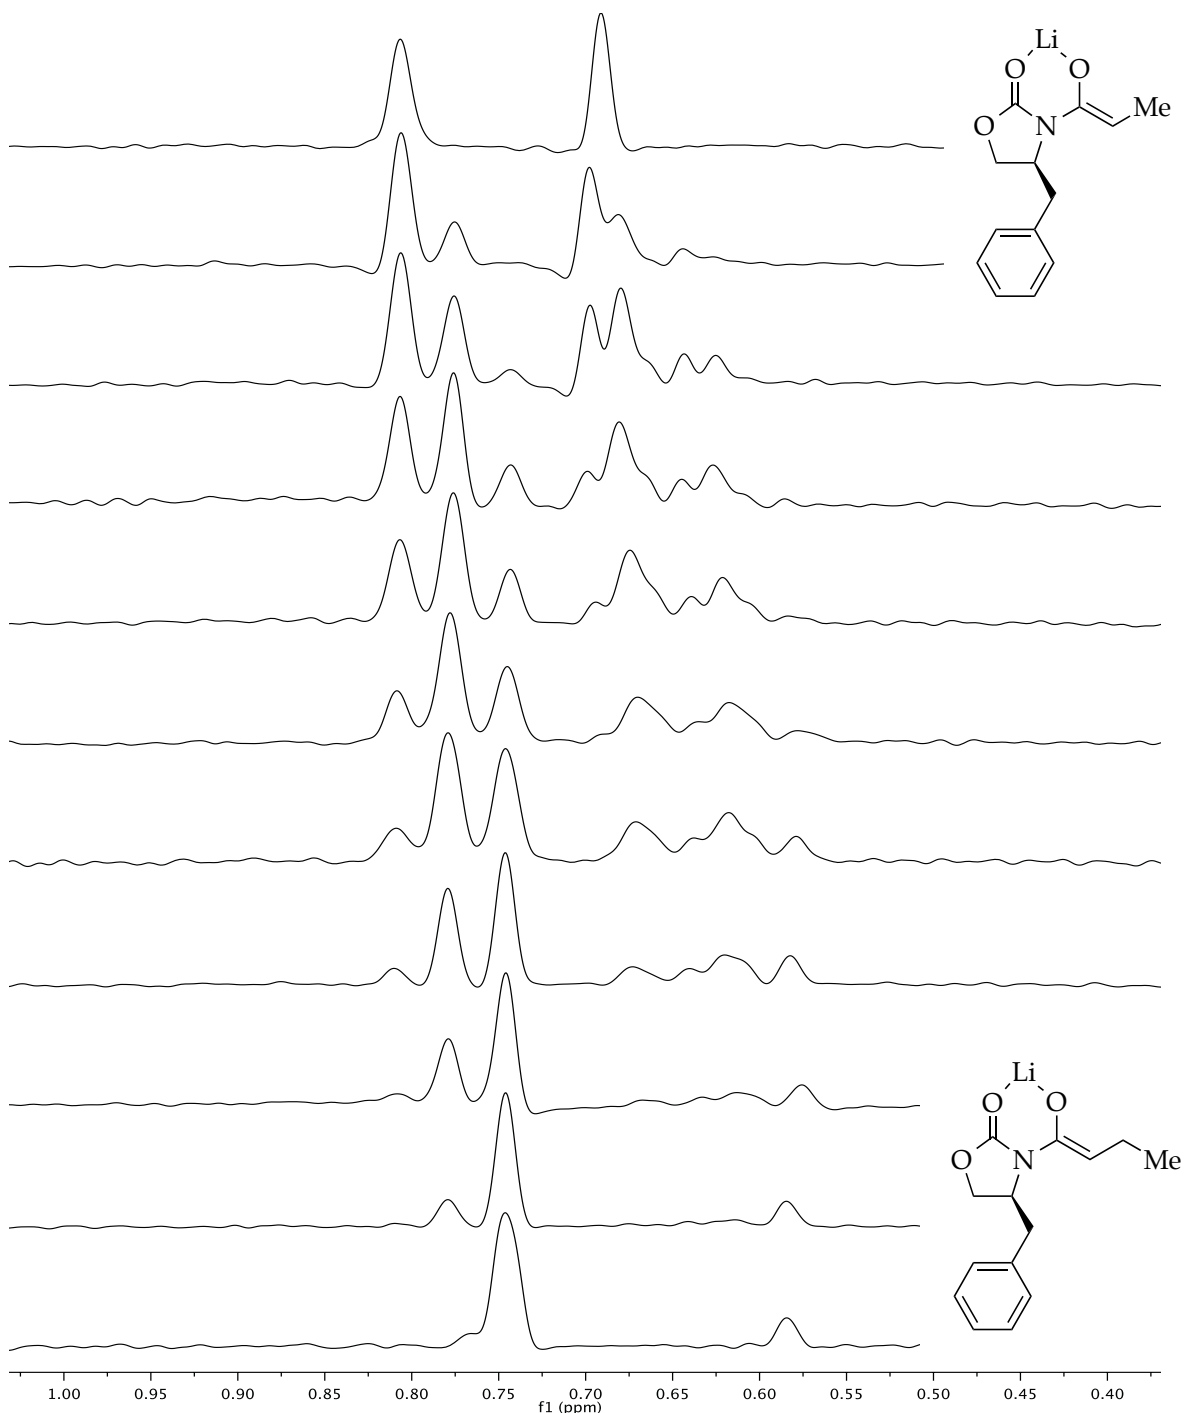

**Figure 38.**  $^6\text{Li}$  NMR spectra of the method of continuous variation of 5 and 6, dimer peaks downfield, (0.10 M total oxazolidinone, 0.10 M [ $^6\text{Li}$ ]LDA) with 1.0 M pyridine in THF at  $-80\text{ }^\circ\text{C}$ .

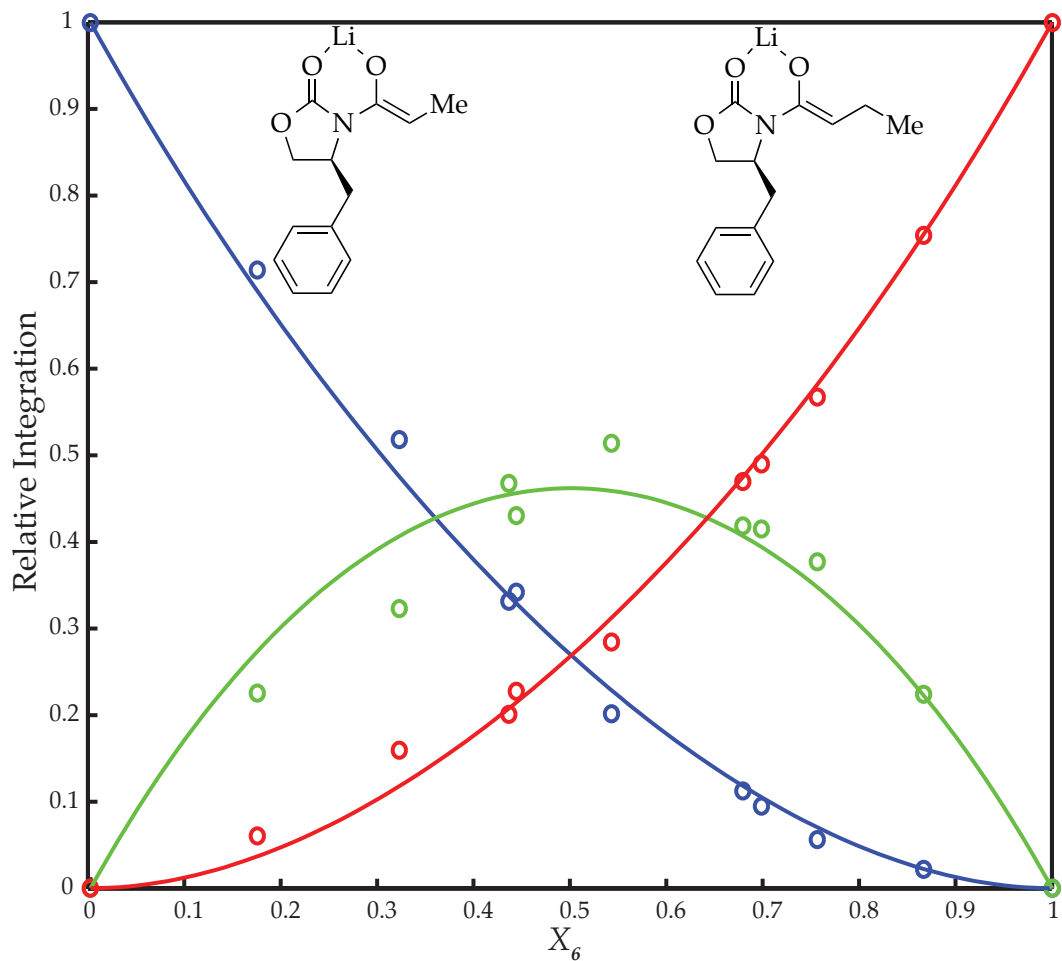

**Figure 39.** Job plot of **5** and **6** dimers (0.10 M total oxazolidinone, 0.10 M [<sup>6</sup>Li]LDA) with 1.0 M pyridine in THF at -80 °C. The relative integrations are plotted as a function of the mole fraction of **6**.

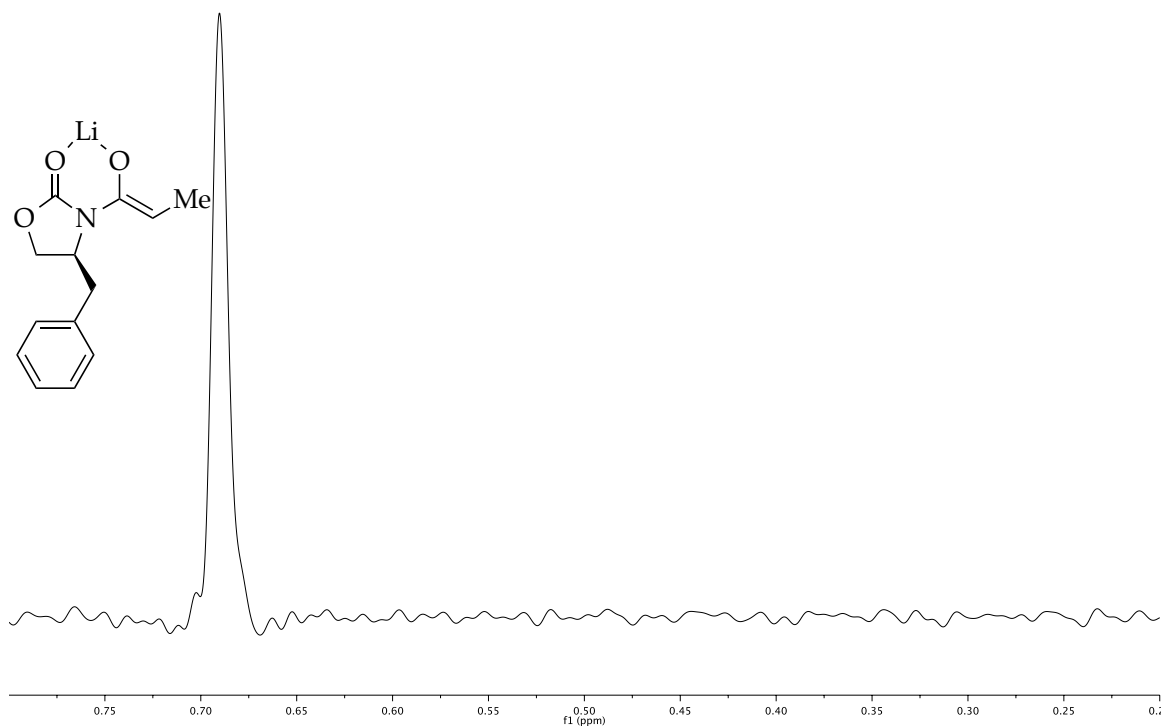

**Figure 40.**  $^6\text{Li}$  NMR spectrum of **5** tetramer (0.10 M **5**) with 0.20 M THF and 1.0 M pyridine in toluene at  $-60\text{ }^\circ\text{C}$ .

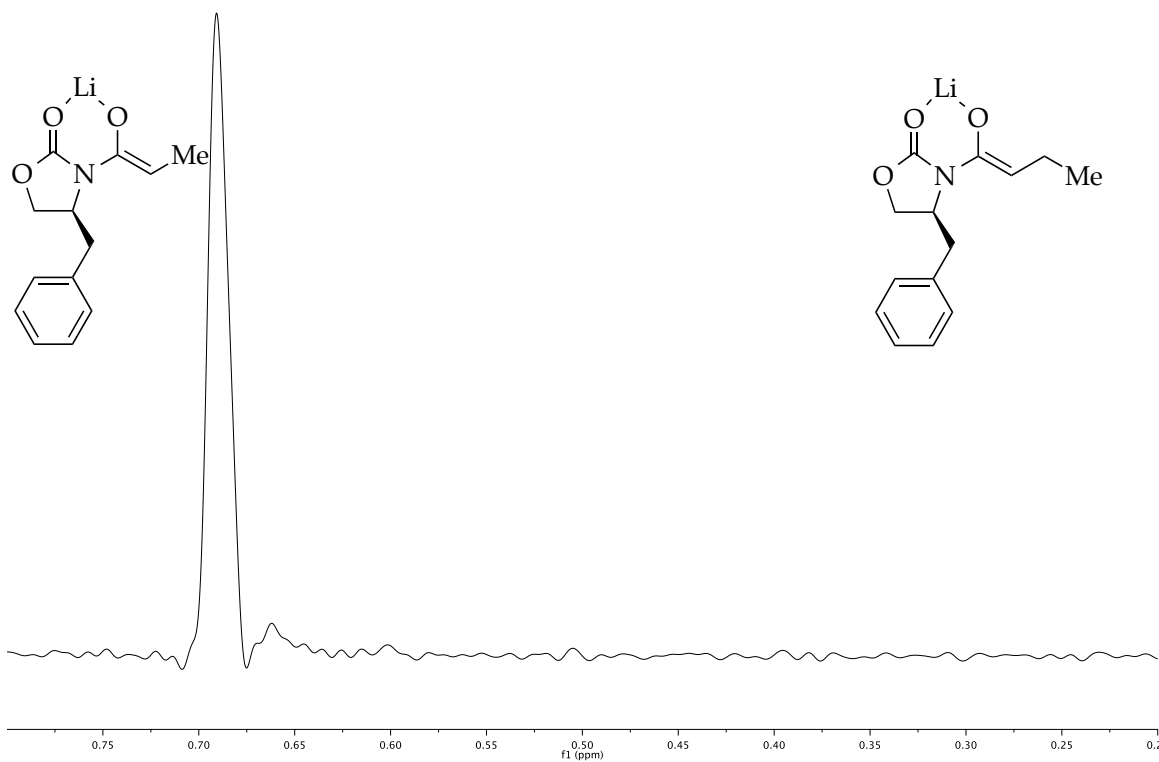

**Figure 41.**  $^6\text{Li}$  NMR spectrum of a 9.8:0.2 mixture of **5** and **6** tetramers (0.098 M **5**, 0.002M **6**) with 0.20 M THF and 1.0 M pyridine in toluene at  $-60\text{ }^\circ\text{C}$ .

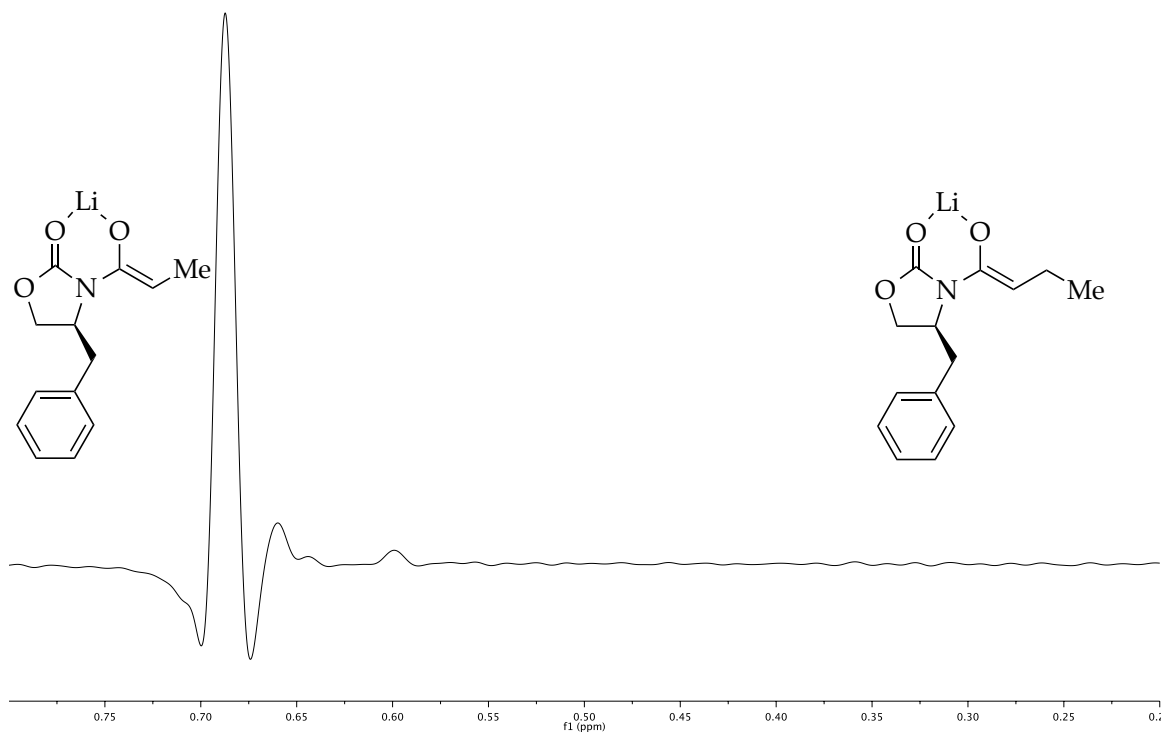

**Figure 42.**  $^6\text{Li}$  NMR spectrum of a 9.6: 0.4 mixture of **5** and **6** tetramers (0.096 M **5**, 0.004M **6**) with 0.20 M THF and 1.0 M pyridine in toluene at  $-60\text{ }^\circ\text{C}$ .



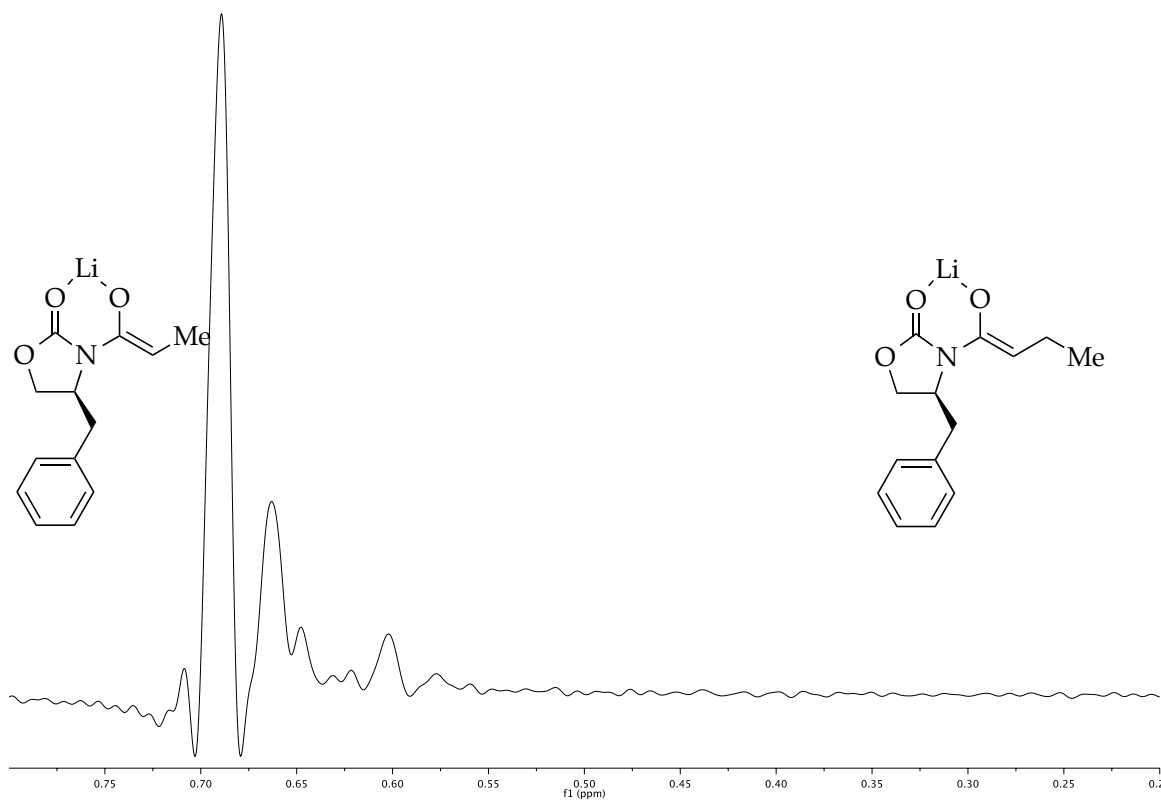

**Figure 43.**  $^6\text{Li}$  NMR spectrum of a 9.4: 0.6 mixture of **5** and **6** tetramers (0.094 M **5**, 0.006 M **6**) with 0.20 M THF and 1.0 M pyridine in toluene at  $-60\text{ }^\circ\text{C}$ .

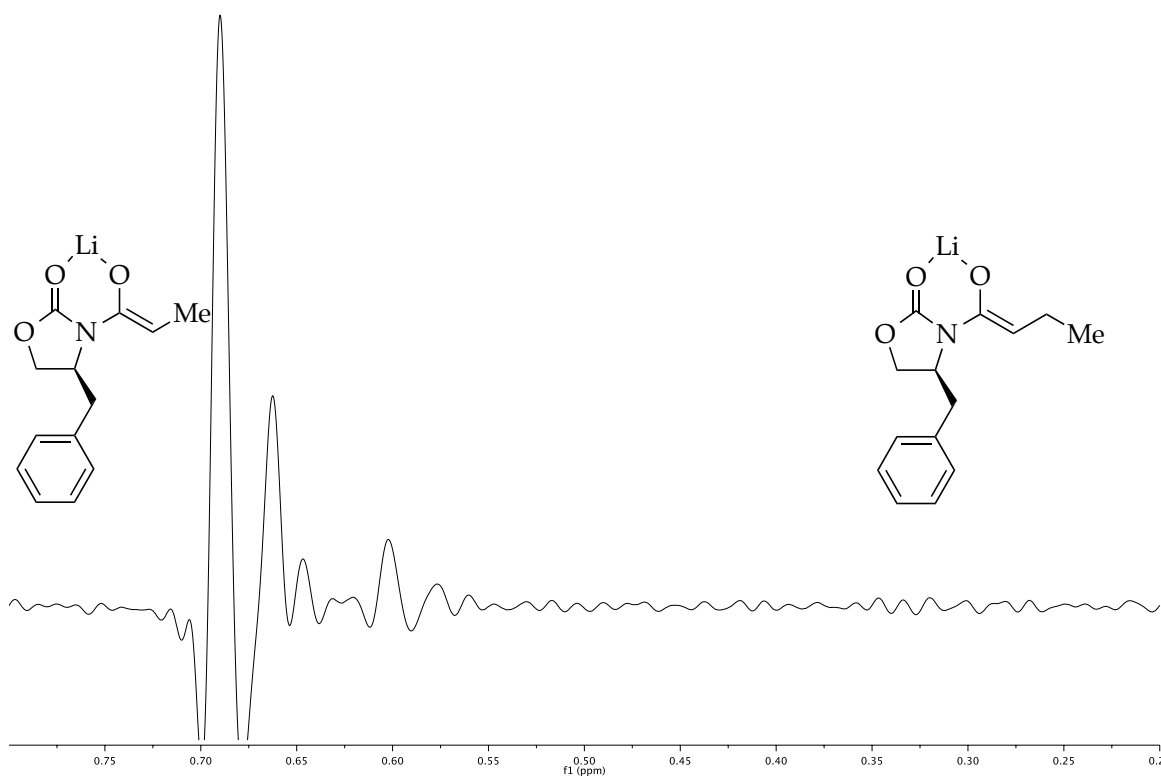

**Figure 44.**  $^6\text{Li}$  NMR spectrum of a 9.2: 0.8 mixture of **5** and **6** tetramers (0.092 M **5**, 0.008 M **6**) with 0.20 M THF and 1.0 M pyridine in toluene at  $-60\text{ }^\circ\text{C}$ .

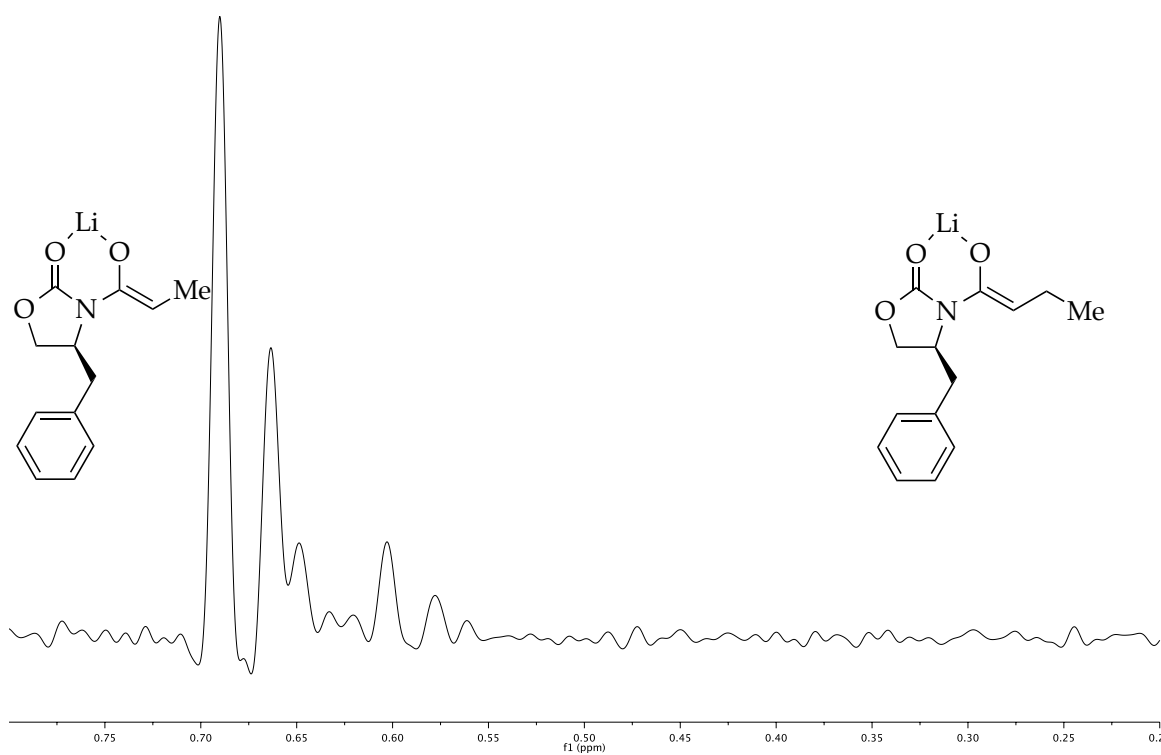

**Figure 45.**  ${}^6\text{Li}$  NMR spectrum of a 9:1 mixture of **5** and **6** tetramers (0.090 M **5**, 0.010 M **6**) with 0.20 M THF and 1.0 M pyridine in toluene at  $-60\text{ }^\circ\text{C}$ .

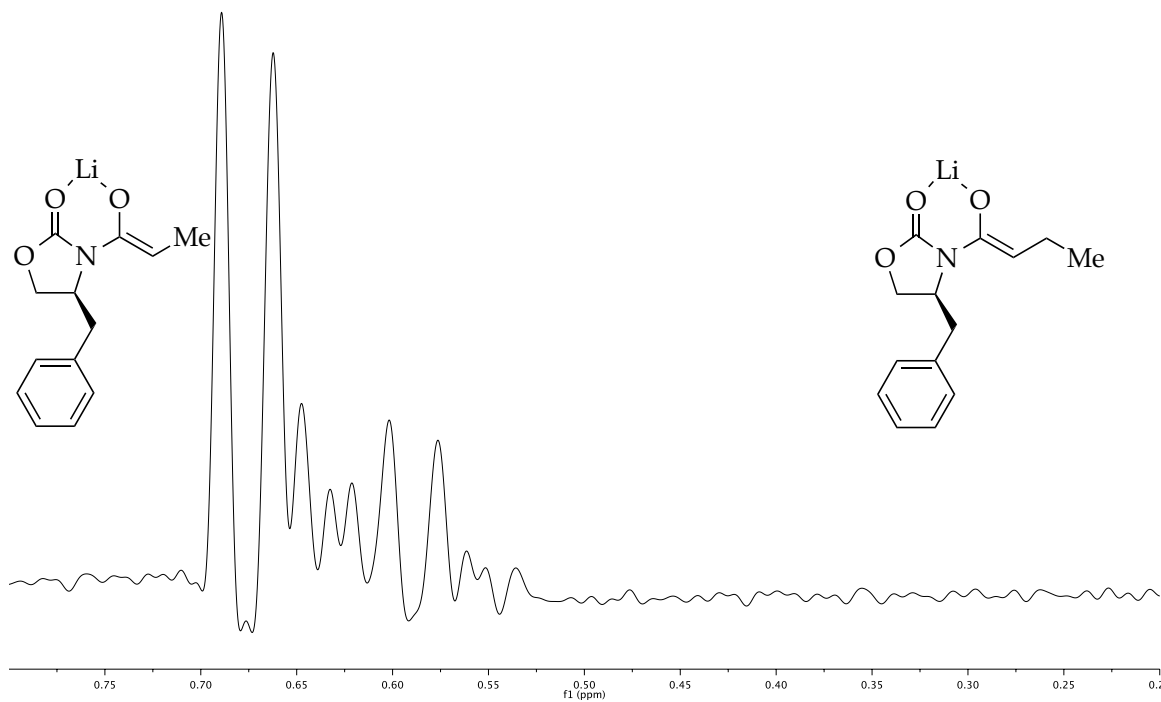

**Figure 46.**  $^6\text{Li}$  NMR spectrum of a 8:2 mixture of **5** and **6** tetramers (0.080 M **5**, 0.020 M **6**) with 0.20 M THF and 1.0 M pyridine in toluene at  $-60\text{ }^\circ\text{C}$ .

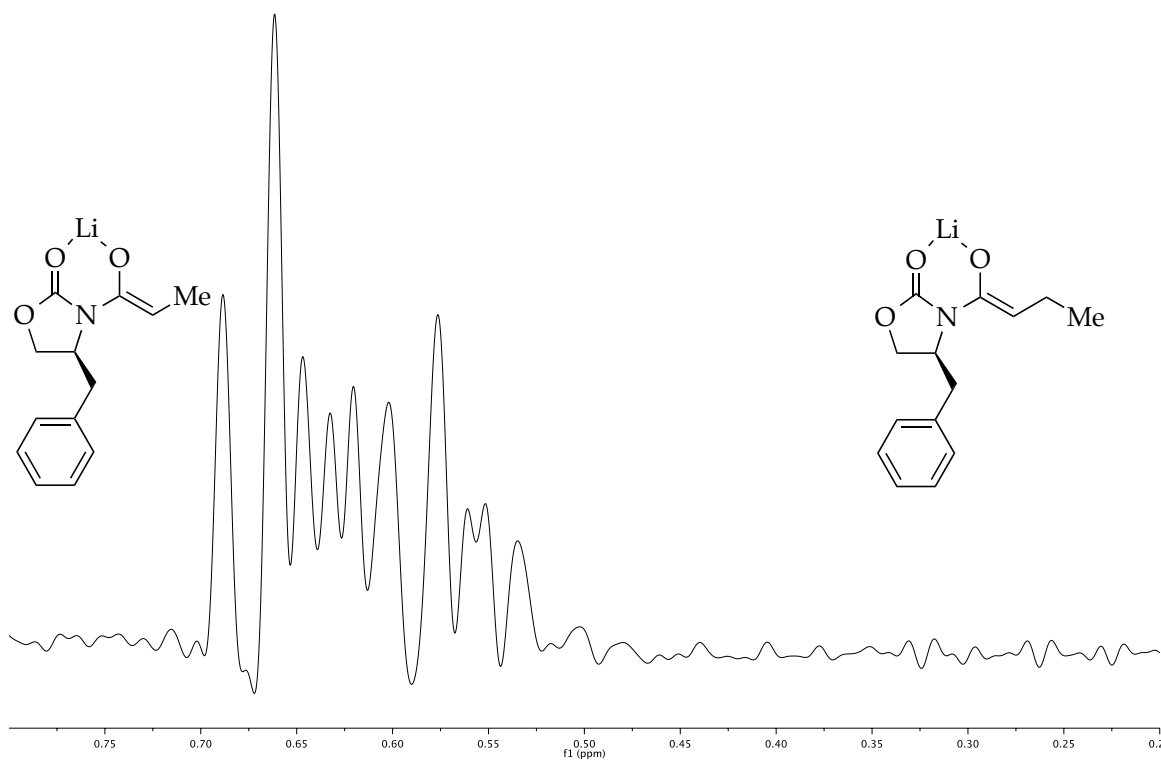

**Figure 47.**  $^6\text{Li}$  NMR spectrum of a 7:3 mixture of **5** and **6** tetramers (0.070 M **5**, 0.030 M **6**) with 0.20 M THF and 1.0 M pyridine in toluene at  $-60^\circ\text{C}$ .

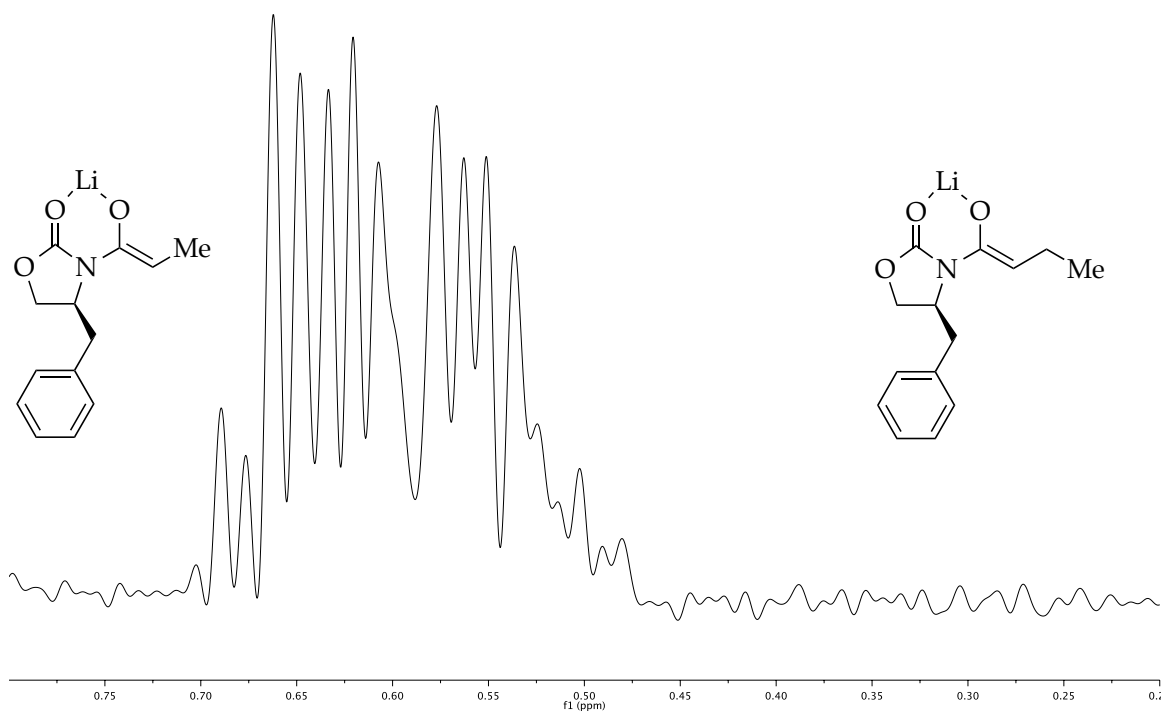

**Figure 48.**  ${}^6\text{Li}$  NMR spectrum of a 6:4 mixture of **5** and **6** tetramers (0.060 M **5**, 0.040 M **6**) with 0.20 M THF and 1.0 M pyridine in toluene at  $-60\text{ }^\circ\text{C}$ .

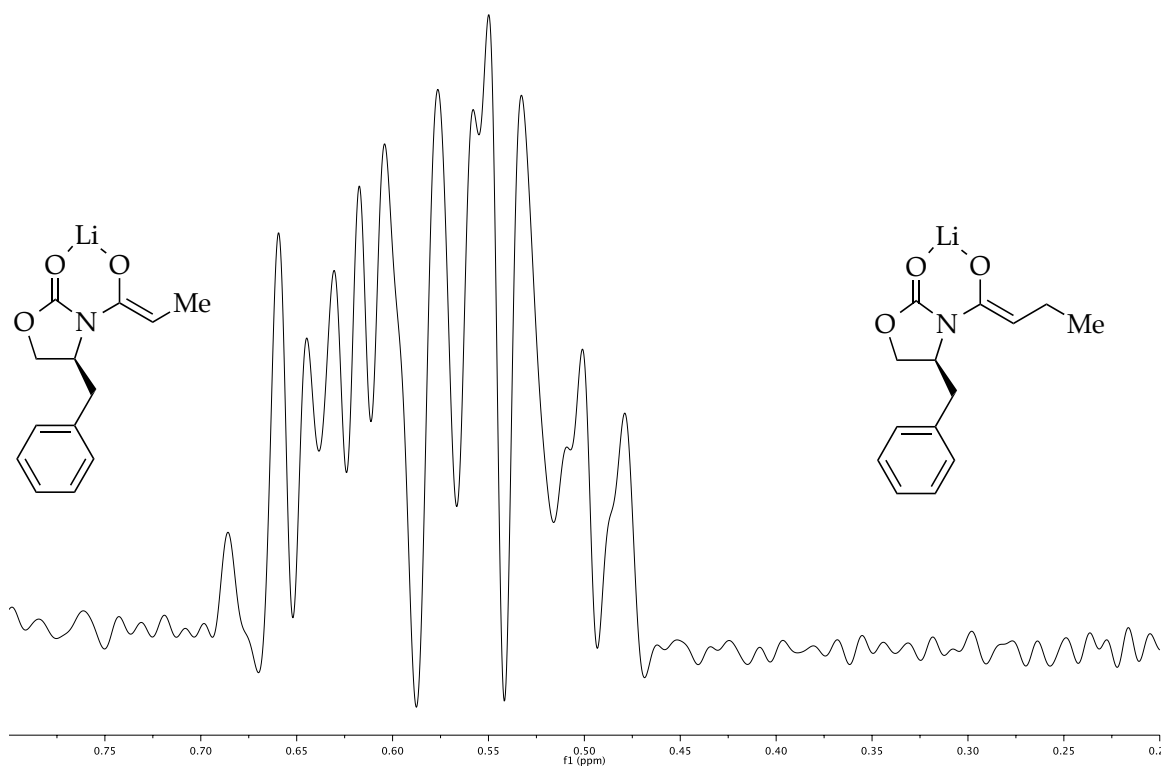

**Figure 49.**  ${}^6\text{Li}$  NMR spectrum of a 5:5 mixture of **5** and **6** tetramers (0.050 M **5**, 0.050 M **6**) with 0.20 M THF and 1.0 M pyridine in toluene at  $-60\text{ }^\circ\text{C}$ .

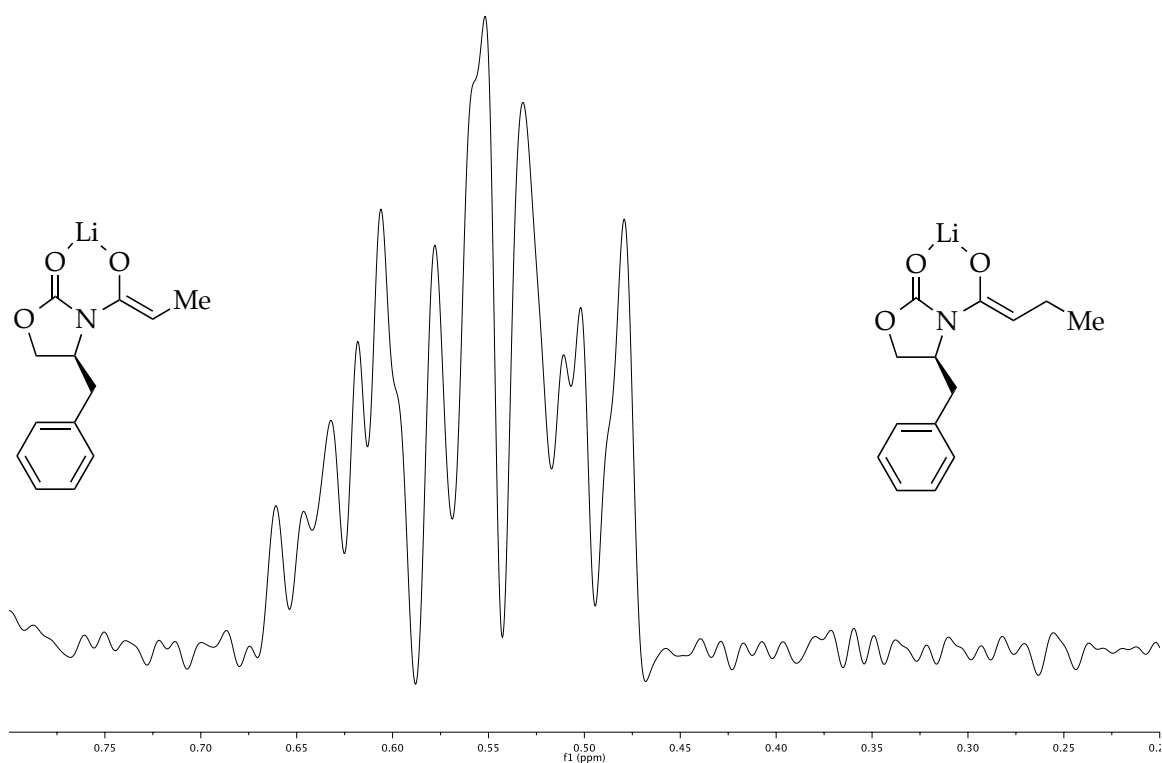

**Figure 50.**  ${}^6\text{Li}$  NMR spectrum of a 4:6 mixture of **5** and **6** tetramers (0.040 M **5**, 0.060 M **6**) with 0.20 M THF and 1.0 M pyridine in toluene at  $-60\text{ }^\circ\text{C}$ .



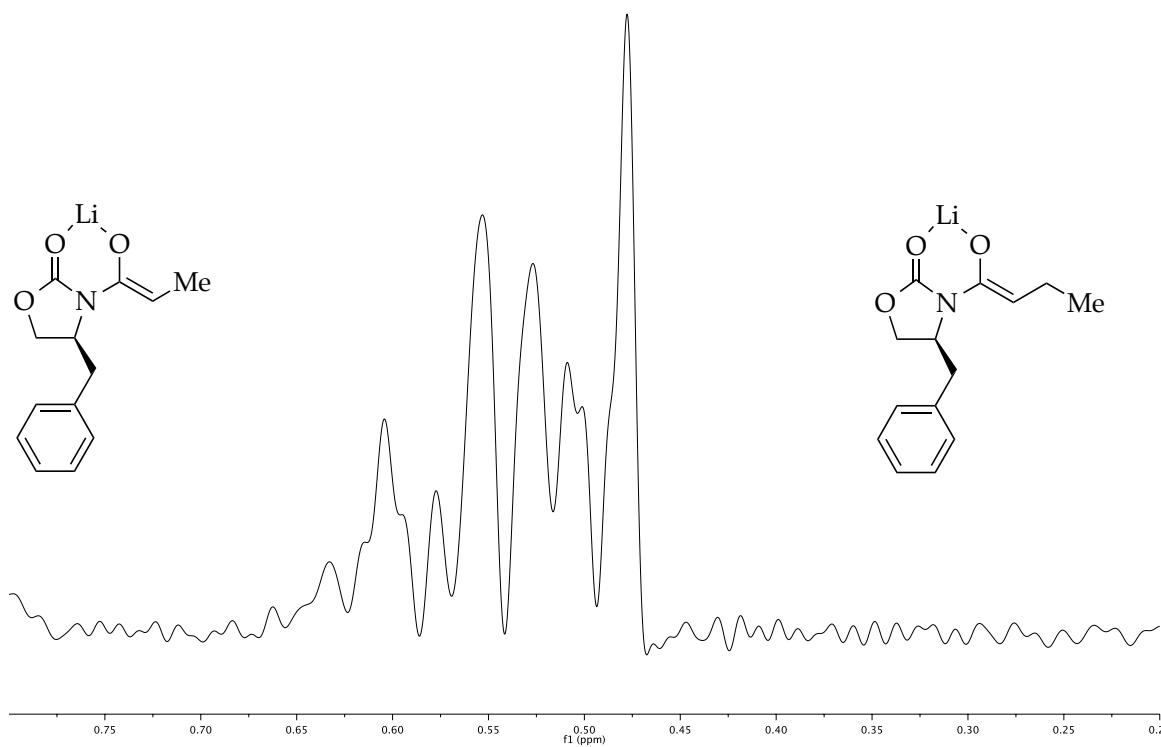

**Figure 51.**  ${}^6\text{Li}$  NMR spectrum of a 3:7 mixture of **5** and **6** tetramers (0.030 M **5**, 0.070 M **6**) with 0.20 M THF and 1.0 M pyridine in toluene at  $-60\text{ }^\circ\text{C}$ .

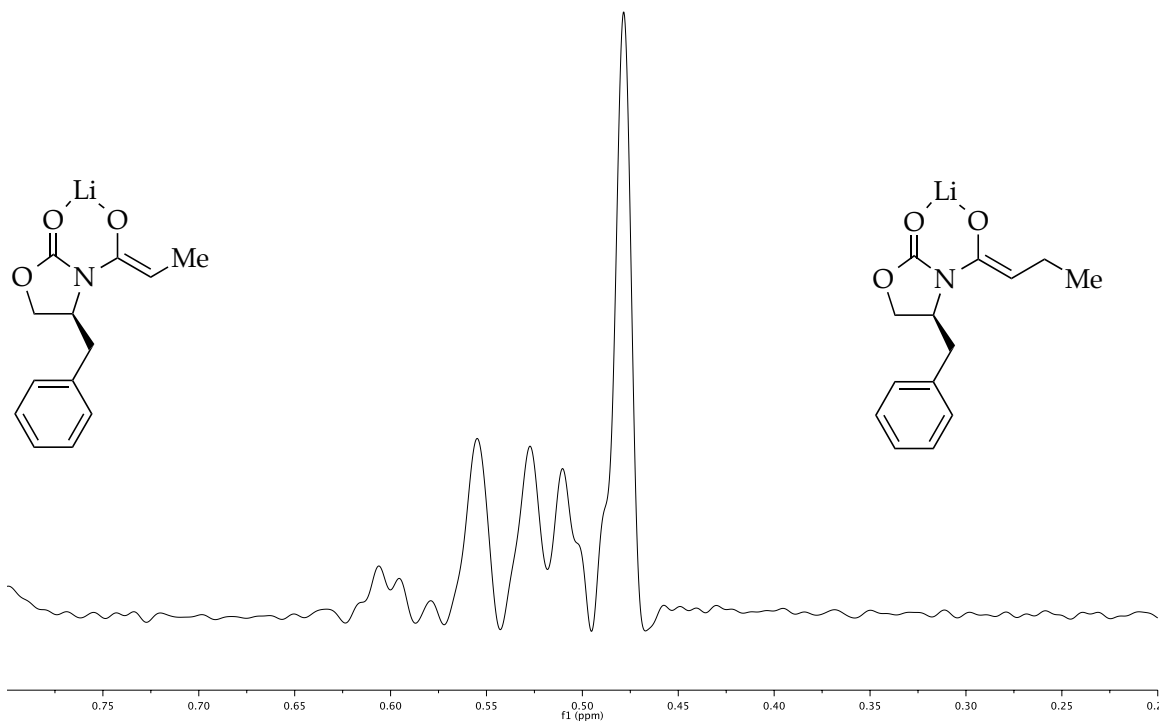

**Figure 52.**  $^6\text{Li}$  NMR spectrum of a 2:8 mixture of **5** and **6** tetramers (0.020 M **5**, 0.080 M **6**) with 0.20 M THF and 1.0 M pyridine in toluene at  $-60\text{ }^\circ\text{C}$ .

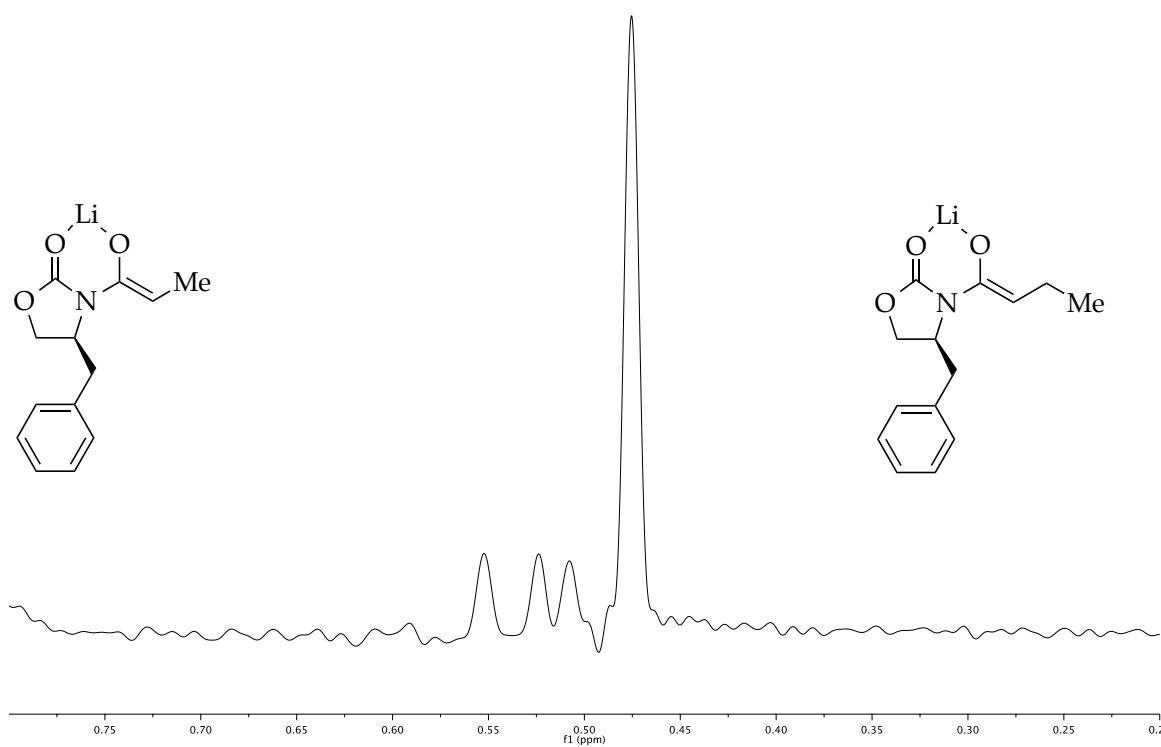

**Figure 53.**  $^6\text{Li}$  NMR spectrum of a 1:9 mixture of **5** and **6** tetramers (0.010 M **5**, 0.090 M **6**) with 0.20 M THF and 1.0 M pyridine in toluene at  $-60\text{ }^\circ\text{C}$ .

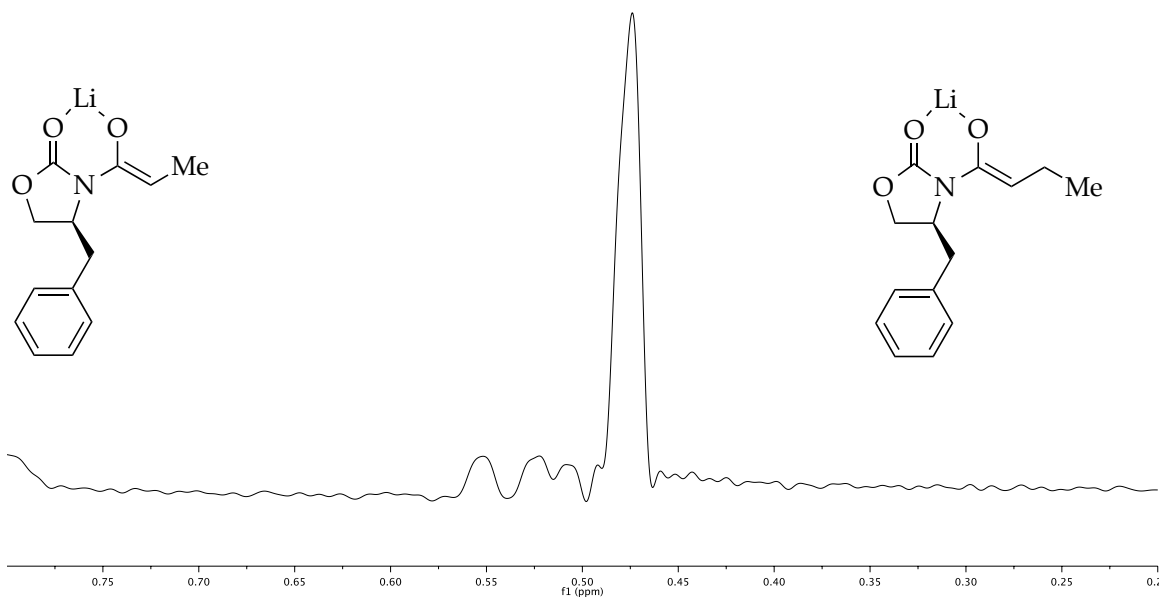

**Figure 54.**  $^6\text{Li}$  NMR spectrum of a 0.8:9.2 mixture of **5** and **6** tetramers (0.008 M **5**, 0.092 M **6**) with 0.20 M THF and 1.0 M pyridine in toluene at  $-60^\circ\text{C}$ .

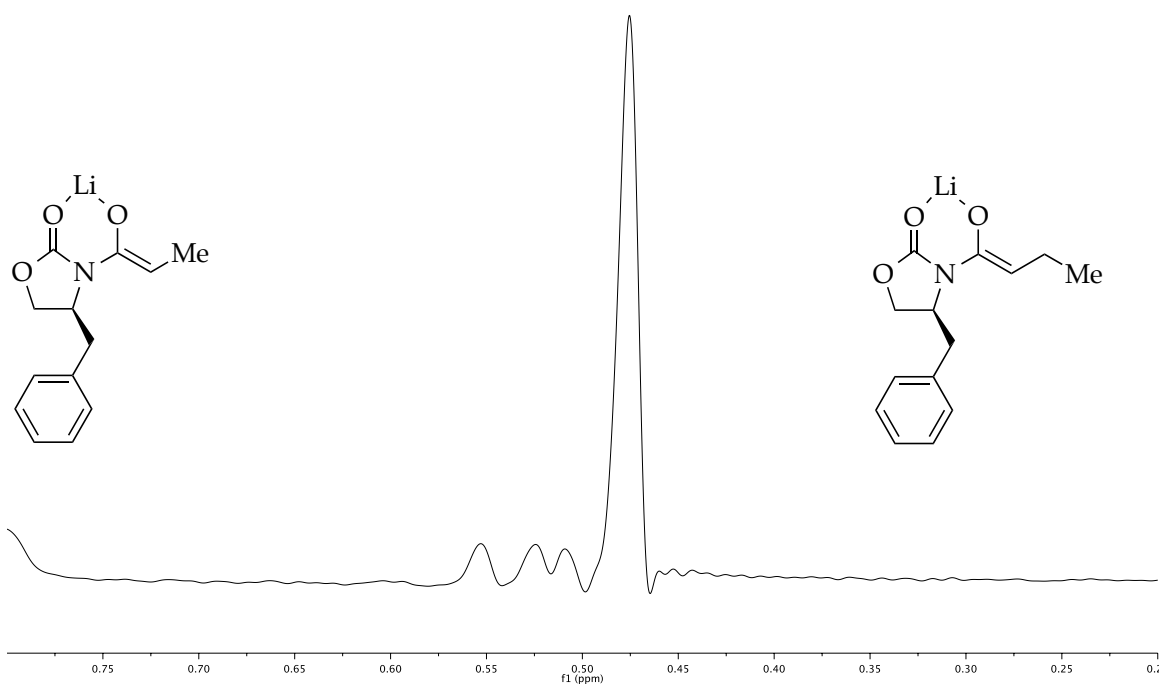

**Figure 55.**  $^6\text{Li}$  NMR spectrum of a 0.6:9.4 mixture of **5** and **6** tetramers (0.006 M **5**, 0.094 M **6**) with 0.20 M THF and 1.0 M pyridine in toluene at  $-60^\circ\text{C}$ .

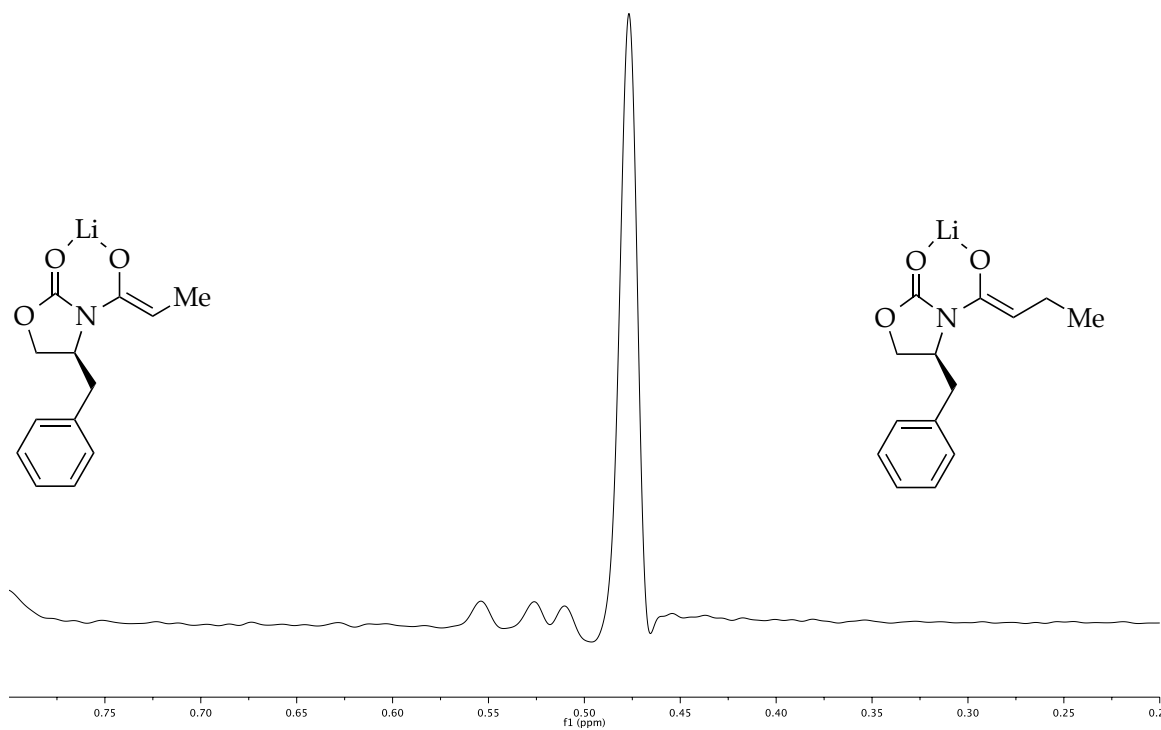

**Figure 56.**  $^6\text{Li}$  NMR spectrum of a 0.4:9.6 mixture of **5** and **6** tetramers (0.004 M **5**, 0.096 M **6**) with 0.20 M THF and 1.0 M pyridine in toluene at  $-60\text{ }^\circ\text{C}$ .

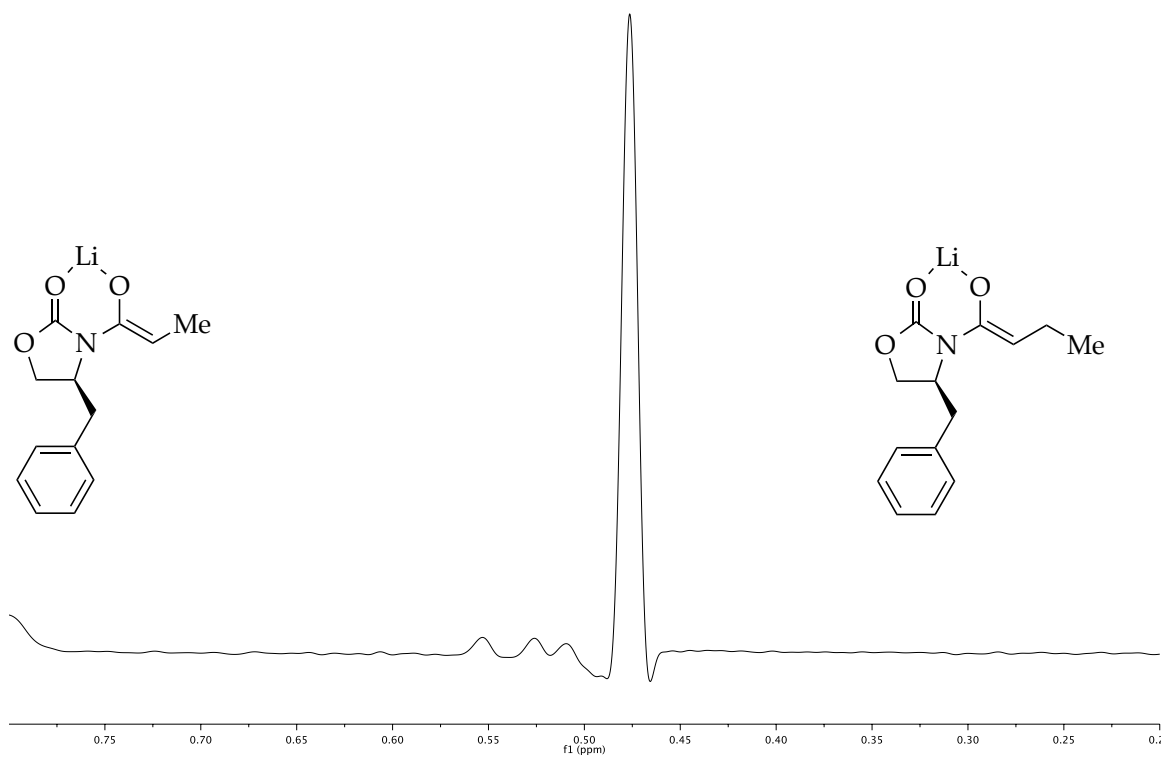

**Figure 57.**  $^6\text{Li}$  NMR spectrum of a 0.2:9.8 mixture of **5** and **6** tetramers (0.002 M **5**, 0.098 M **6**) with 0.20 M THF and 1.0 M pyridine in toluene at  $-60\text{ }^\circ\text{C}$ .

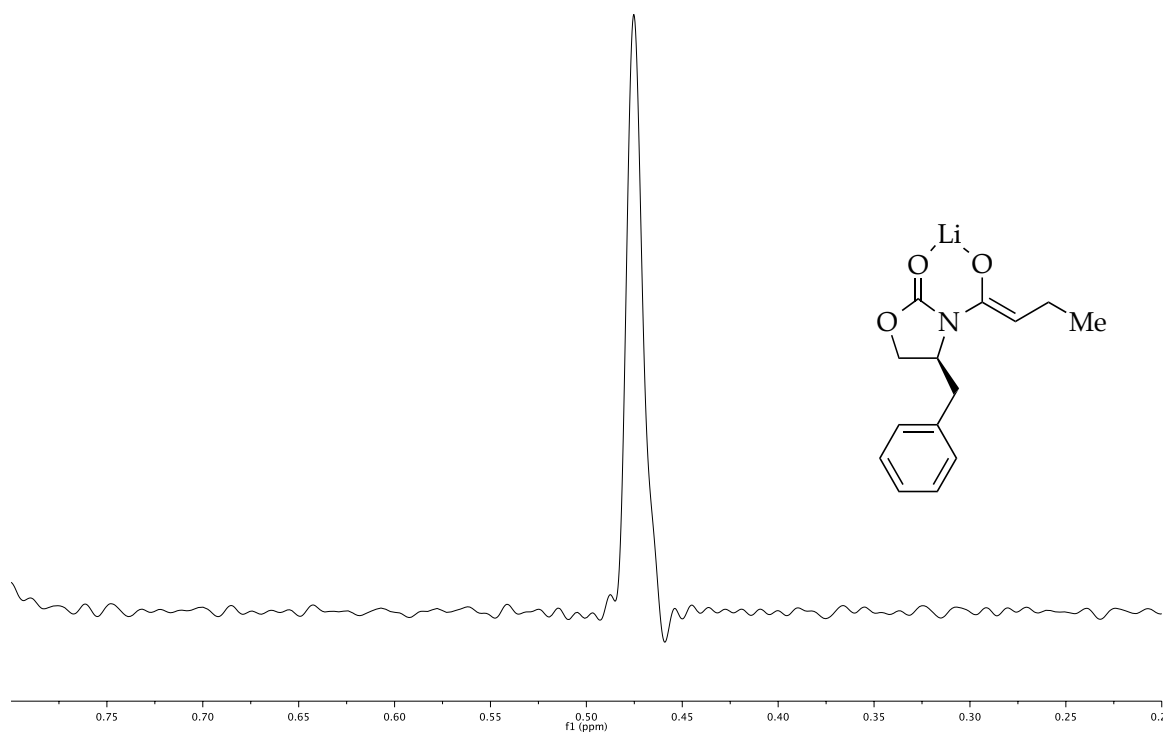

**Figure 58.**  ${}^6\text{Li}$  NMR spectrum of **6** tetramer (0.10 M **6**) with 0.20 M THF and 1.0 M pyridine in toluene at  $-60\text{ }^\circ\text{C}$ .



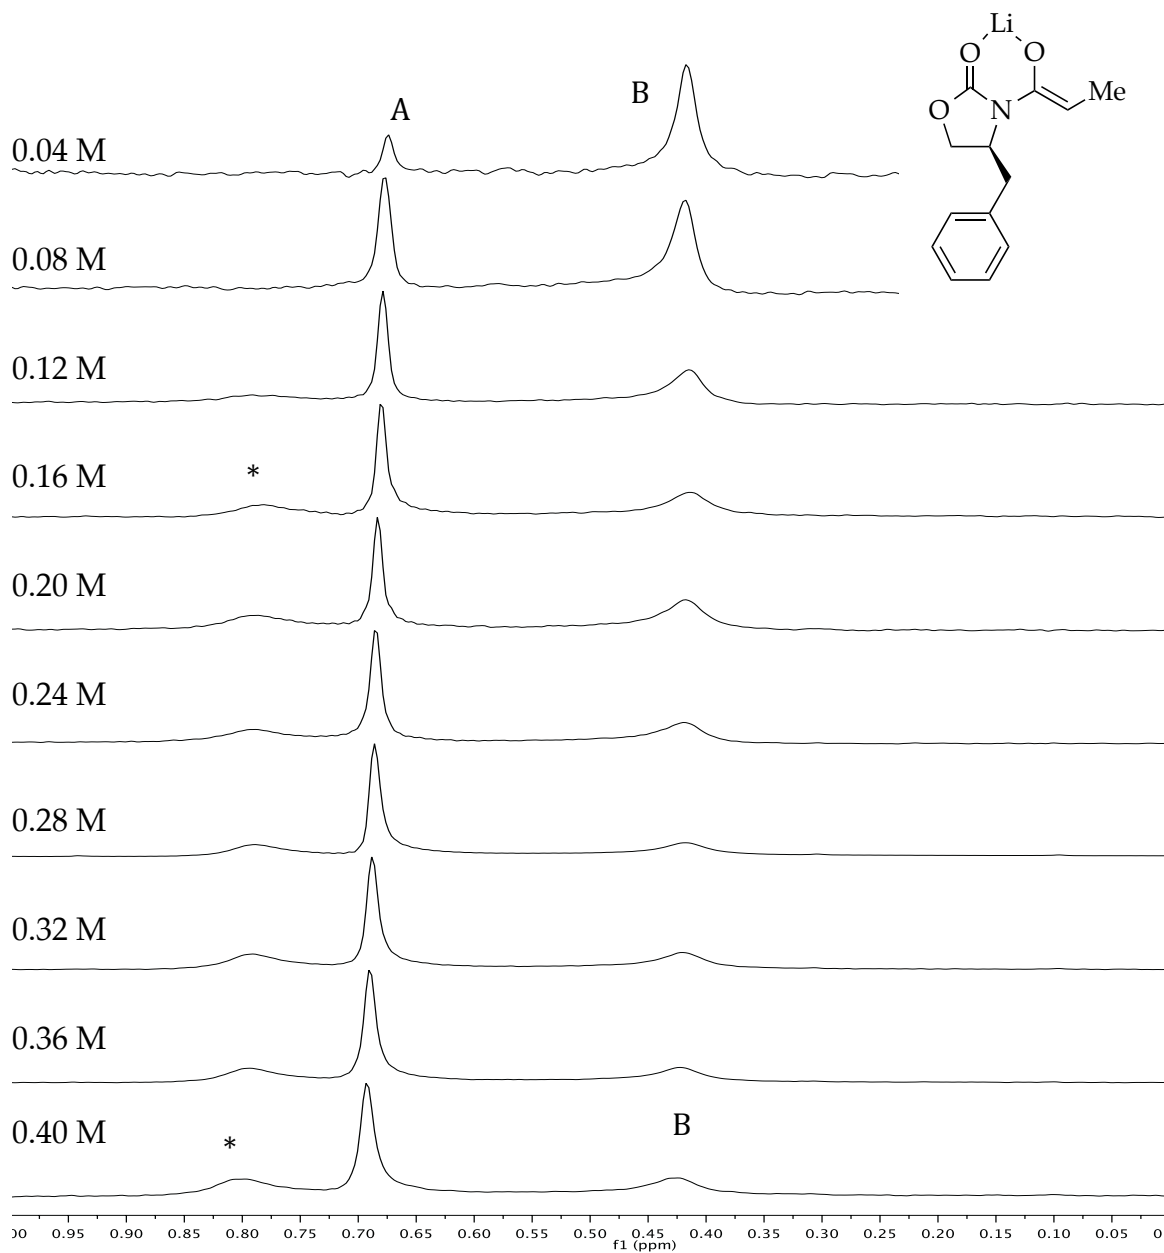

**Figure 59.**  $^6\text{Li}$  NMR spectra of **5** (5, 1.1 equiv  $[\text{}^6\text{Li}]\text{LDA}$ ) with varying enolate concentrations (as labeled) in neat THF at  $-60\text{ }^\circ\text{C}$ . **A** is the unsolvated tetramer; **B** is the coalesced trisolvated dimers. The mixed aggregate is marked by \*.

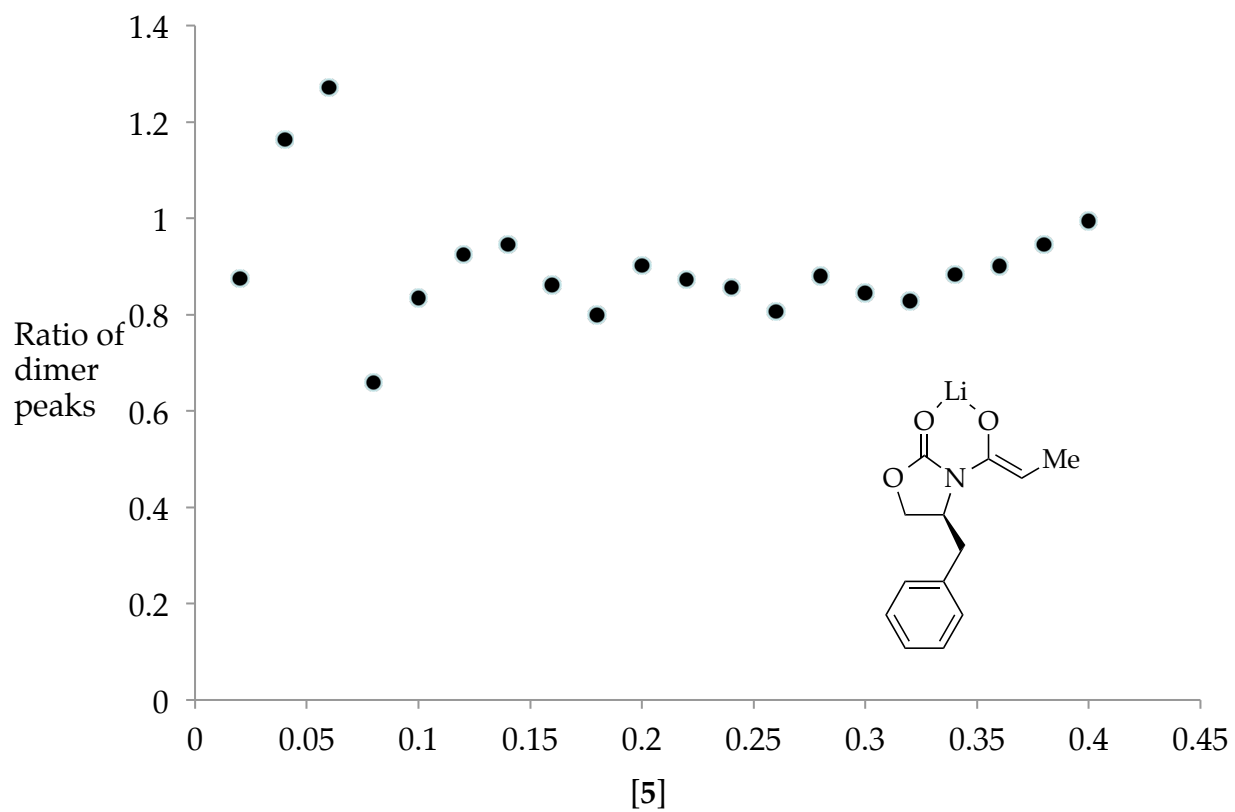

**Figure 60.** Plot of the relative integrations of the two dimers of **5** at 0.10 M in neat THF at  $-80^{\circ}\text{C}$ .

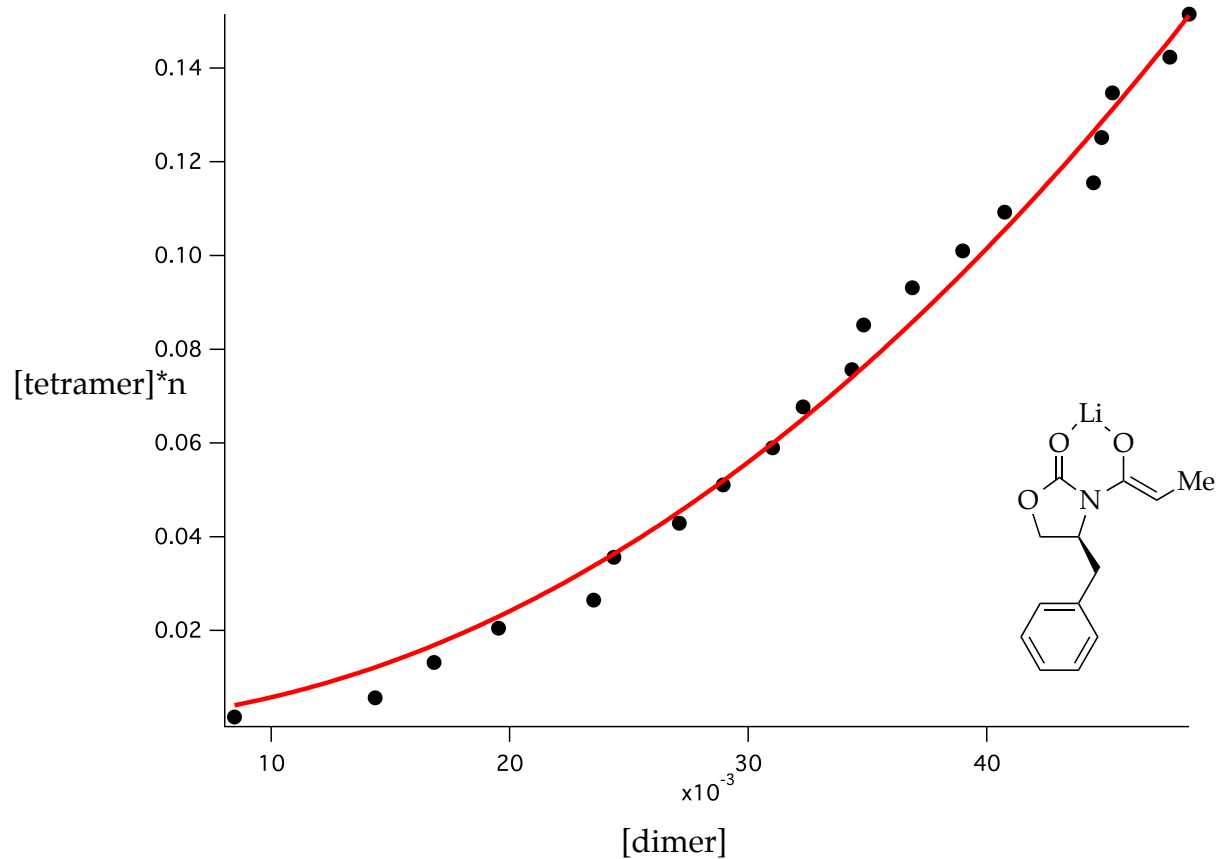

**Figure 61.** Fit of dimer concentration vs. tetramer concentration for **5** to determine the tetramer aggregation state at  $-60\text{ }^{\circ}\text{C}$ . The best fit, in red, gives a aggregation number of the higher aggregate, now known to be tetramer, of  $4.1 \pm 0.2$ . The fitting equation was  $Y = n * K_{eq}^{1/2} X^{n/2}$  The derivation of this expression follows (pg. 76).

**Equation 1.** Explanation for the fitting equation of **Figure 35**.

Let  $A_n \equiv$  Aggregate with aggregation number  $n$

Let  $A_2 \equiv$  Dimer aggregate

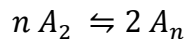

$$\text{Therefore } K_{eq} = \frac{[A_n]^2}{[A_2]^n}$$

Let  $\chi_{A_2} \equiv$  Mole fraction of A in dimer aggregate

Let  $\chi_{A_n} \equiv$  Mole fraction of A in aggregate with aggregation number  $n$

Let  $I_n \equiv$  NMR integration of peak of aggregate with aggregation number  $n$

Let  $I_D \equiv$  NMR integration of peak of dimer aggregate

$$\text{Therefore } \chi_{A_2} = \frac{I_D}{I_D + I_n}$$

$$\text{and } \chi_{A_n} = \frac{I_n}{I_D + I_n}$$

Let  $C_{tot} \equiv$  Total concentration of enolate in solution

$$\text{Therefore } [A_2] = \frac{I_D}{I_D + I_n} \left( \frac{C_{tot}}{2} \right)$$

$$\text{and } [A_n] = \frac{I_n}{I_D + I_n} \left( \frac{C_{tot}}{n} \right)$$

Rearrange  $K_{eq}$  equation to give  $[A_n] = K_{eq}^{1/2} [A_2]^{n/2}$

$$\text{substitute integrations for concentrations } \frac{I_n}{I_D + I_n} \left( \frac{C_{tot}}{n} \right) = K_{eq}^{1/2} \left( \frac{I_D}{I_D + I_n} \left( \frac{C_{tot}}{2} \right) \right)^{n/2}$$

$$\text{multiply by } n \quad \frac{I_n C_{tot}}{I_D + I_n} = n * K_{eq}^{1/2} \left( \frac{I_D}{I_D + I_n} \left( \frac{C_{tot}}{2} \right) \right)^{n/2}$$

Plug in values for  $I_n$ ,  $I_D$ , and  $C_{tot}$

This gives you

$$Y = n * K_{eq}^{1/2} X^{n/2}$$

where

$$Y = \frac{I_n C_{tot}}{I_D + I_n} = n * [A_n]; \quad X = \frac{I_D}{I_D + I_n} \left( \frac{C_{tot}}{2} \right) = [A_2]$$

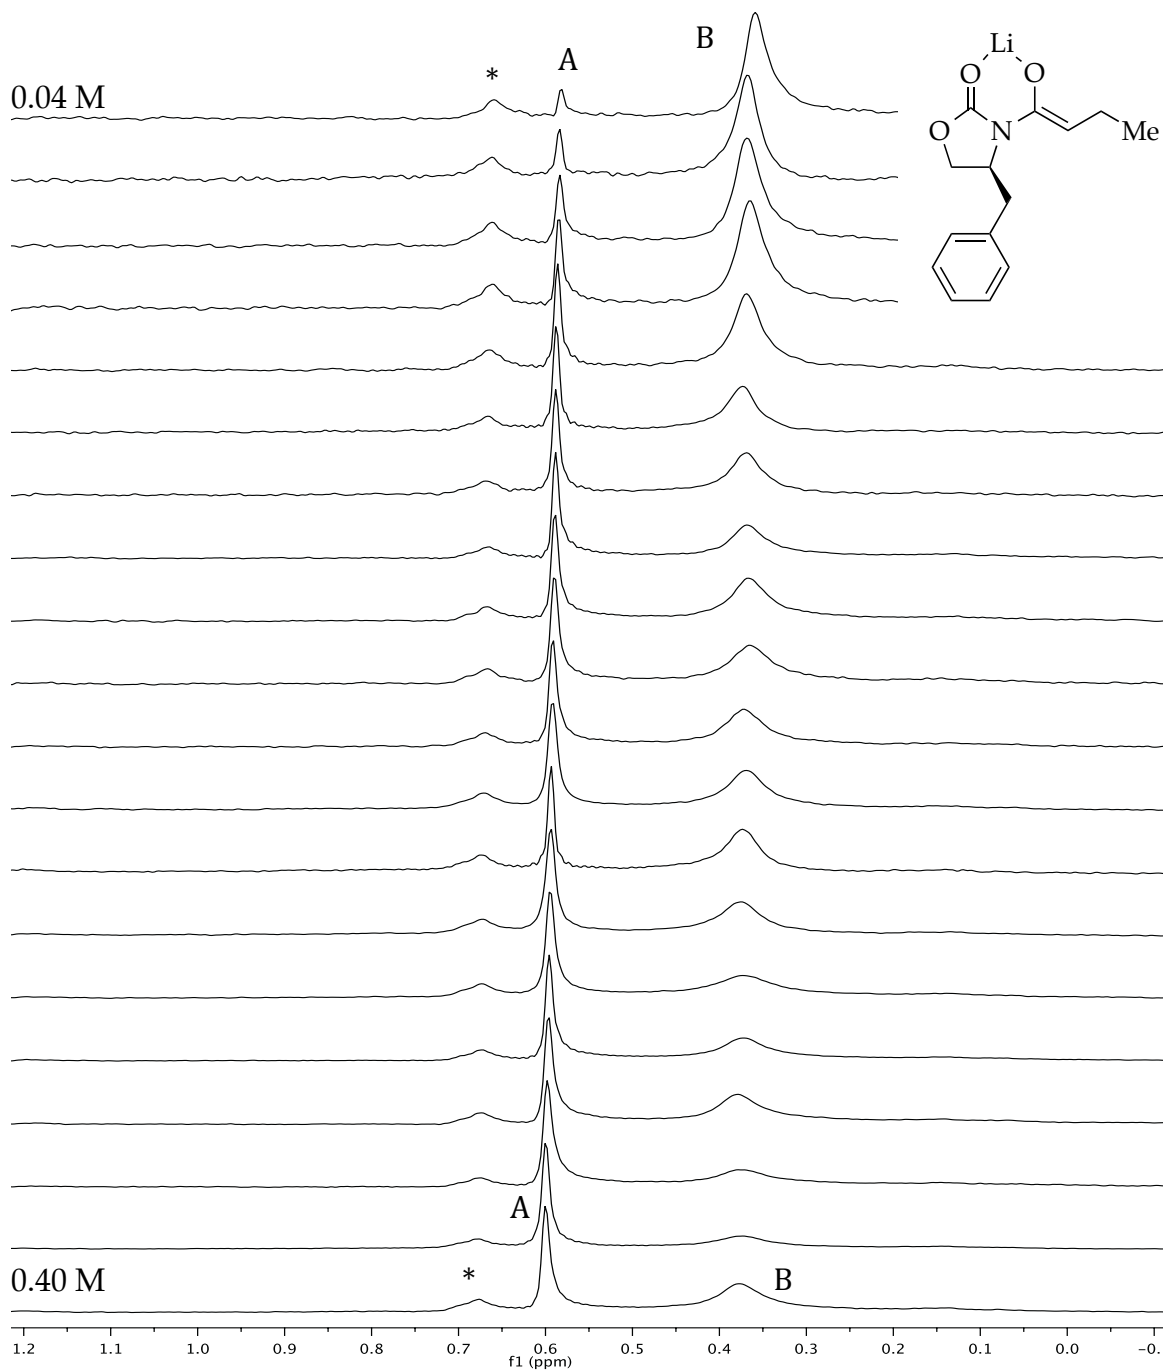

**Figure 62.**  ${}^6\text{Li}$  NMR spectra of **6** with varying enolate concentrations (as labeled) in neat THF at  $-40\text{ }^\circ\text{C}$ . **A** is the unsolvated tetramer; **B** is the coalesced trisolvated dimers. The LDA-**6** mixed dimer is marked \*.

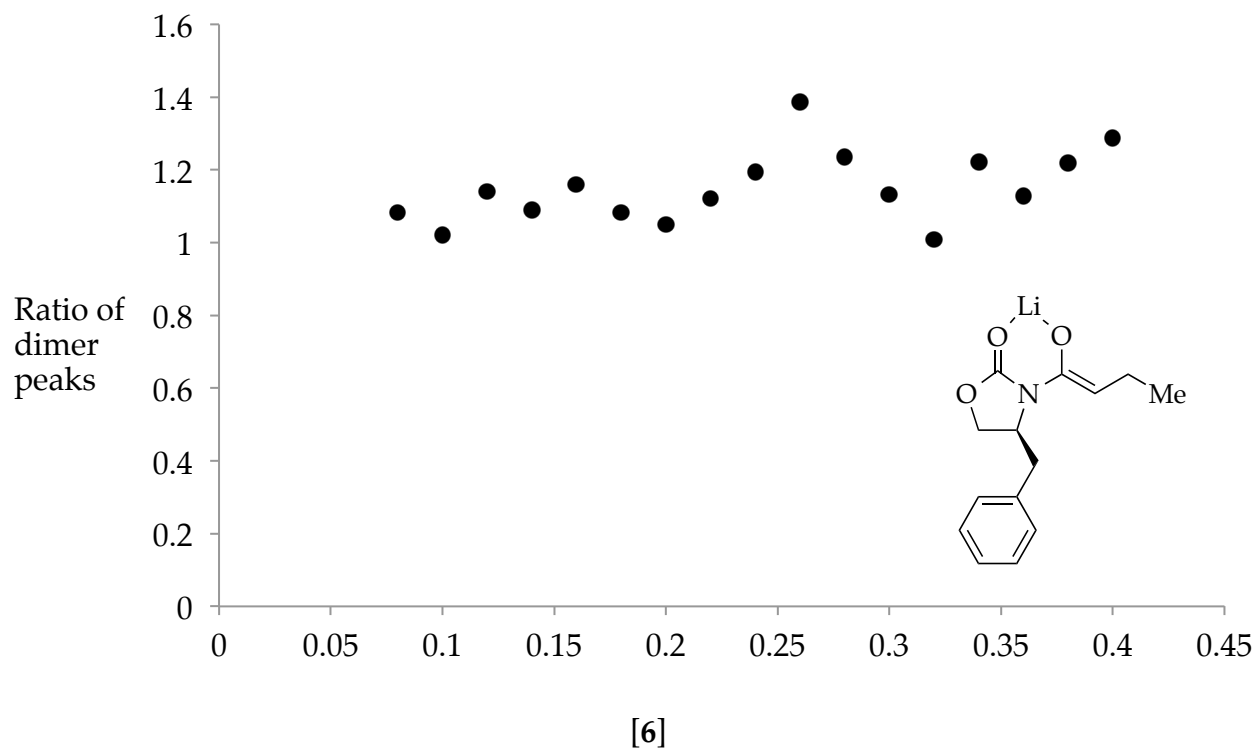

**Figure 63.** Plot of the relative integrations of the two dimers of **6** at 0.10 M in neat THF at -80°C.

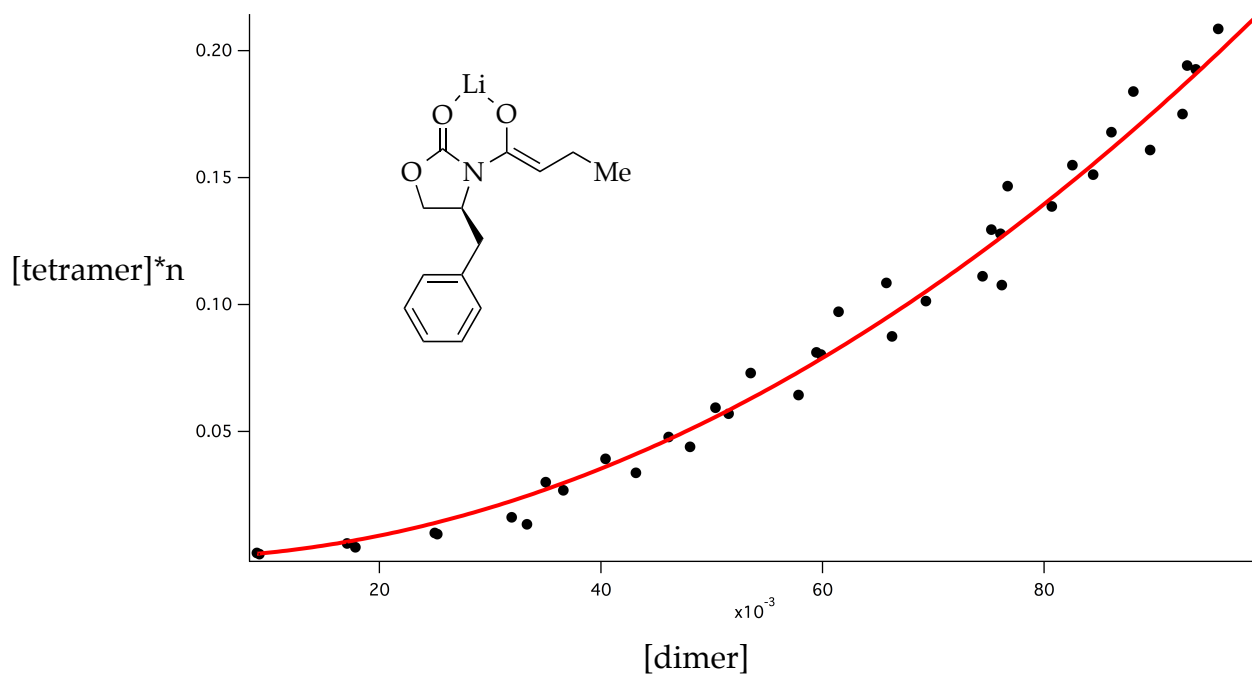

**Figure 64.** Fit of dimer concentration vs. tetramer concentration for **6** to determine the tetramer aggregation state at  $-40\text{ }^{\circ}\text{C}$ . The best fit, in red, gives a aggregation number of the higher aggregate, now known to be tetramer, of  $4.0 \pm 0.1$ . The fitting equation was  $Y = n * K_{eq}^{1/2} X^{n/2}$

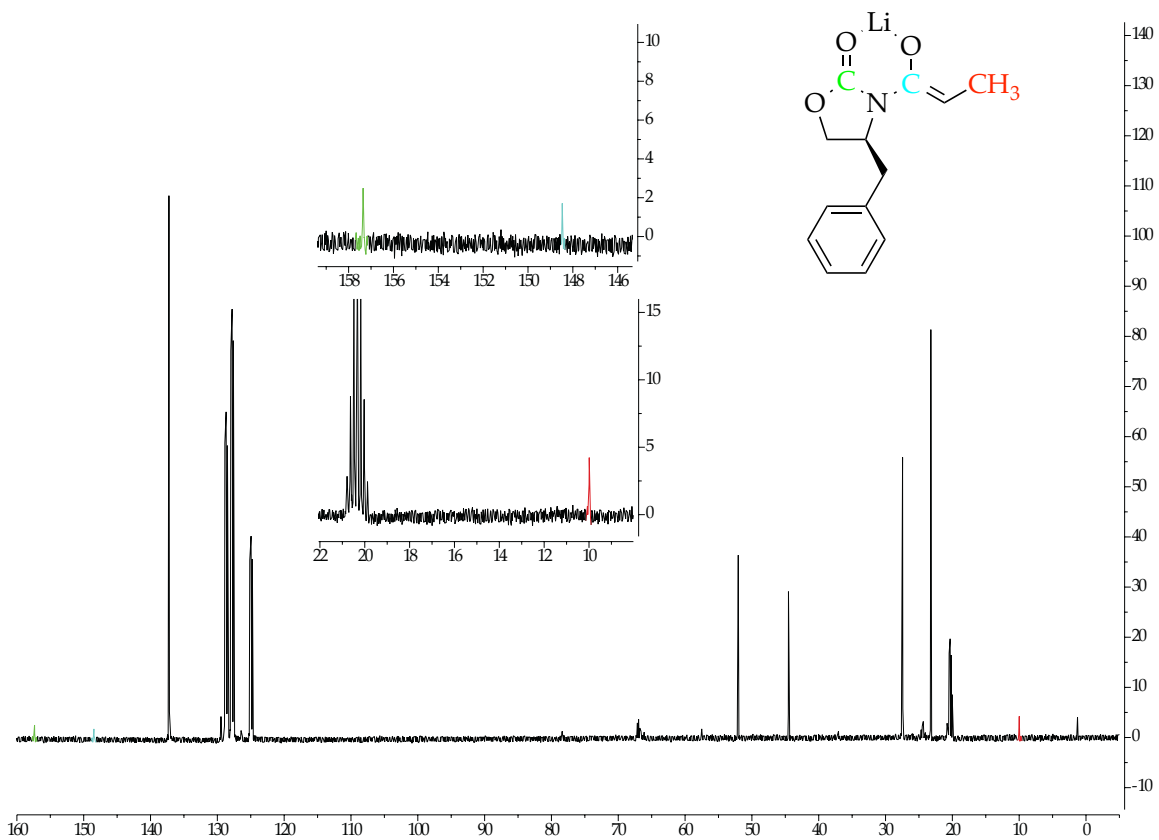

**Figure 65.**  $^{13}\text{C}$  NMR spectrum of **5** tetramer at 0.3 M with 0.60 M  $\text{D}_8$  THF in  $\text{D}_8$  toluene at  $-80\text{ }^\circ\text{C}$ .



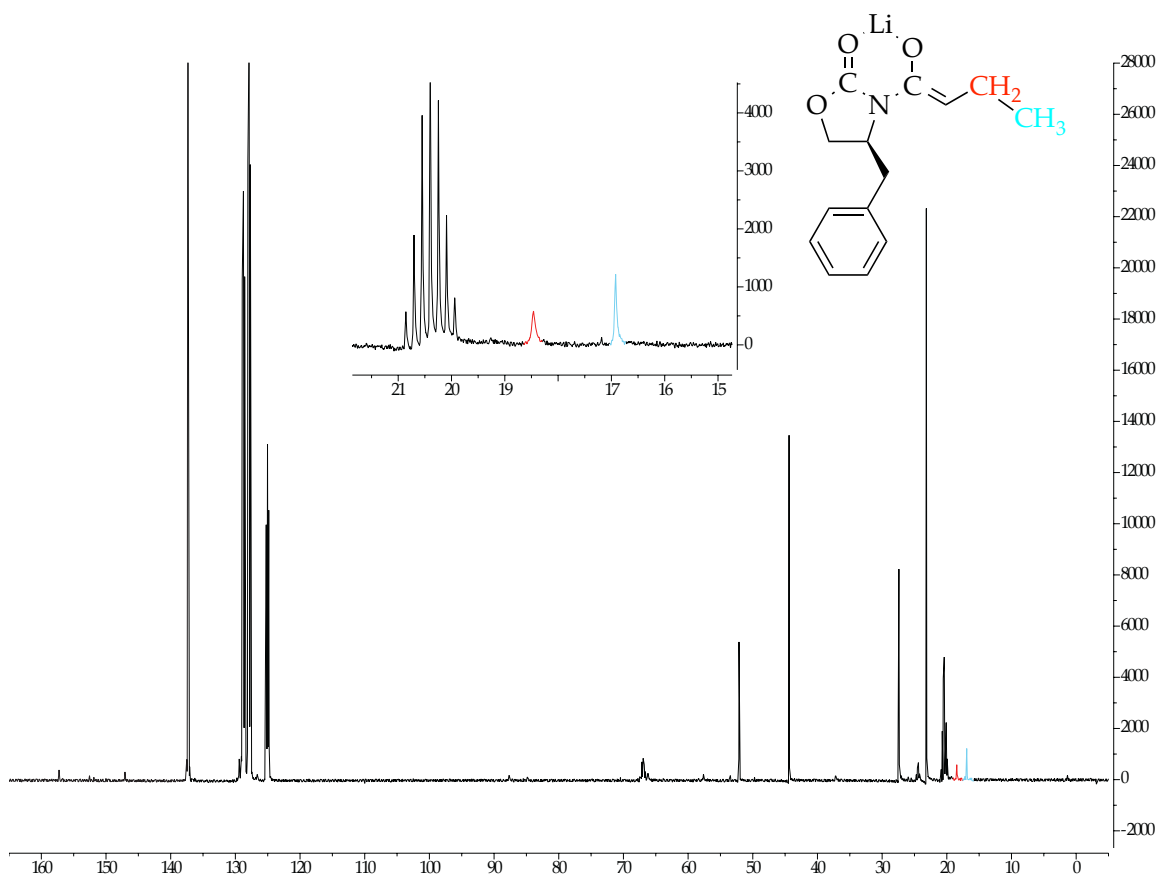

**Figure 66.**  $^{13}\text{C}$  NMR spectrum of **6** tetramer at 0.30 M with 0.60 M  $\text{D}_8$  THF in  $\text{D}_8$  toluene at  $-80\text{ }^\circ\text{C}$ .

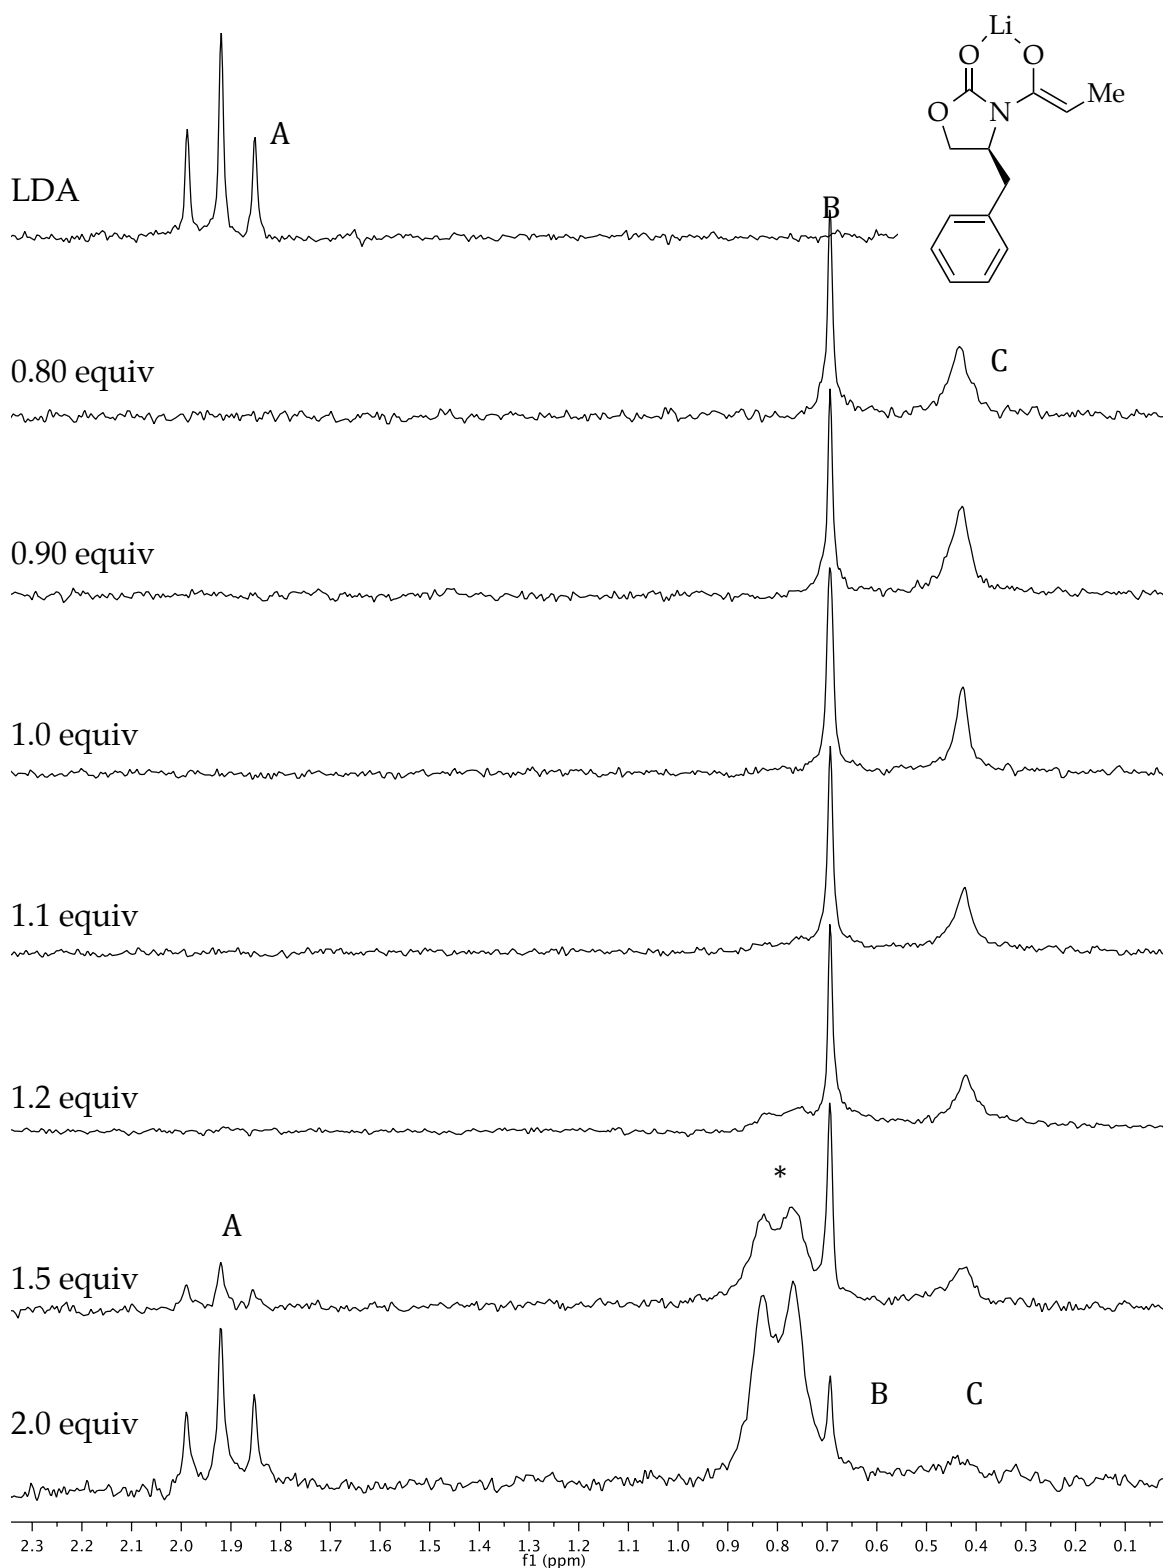

**Figure 67.**  $^6\text{Li}$  NMR spectra of **5** (0.20 M) with changing  $[\text{}^6\text{Li}^{15}\text{N}]\text{LDA}$  ratio to the oxazolidinone (as labeled) in THF at  $-60^\circ\text{C}$ . **A** is free LDA; **B** is the unsolvated tetramer; **C** is the coalesced trisolvated dimers. The mixed aggregate is labeled \*.

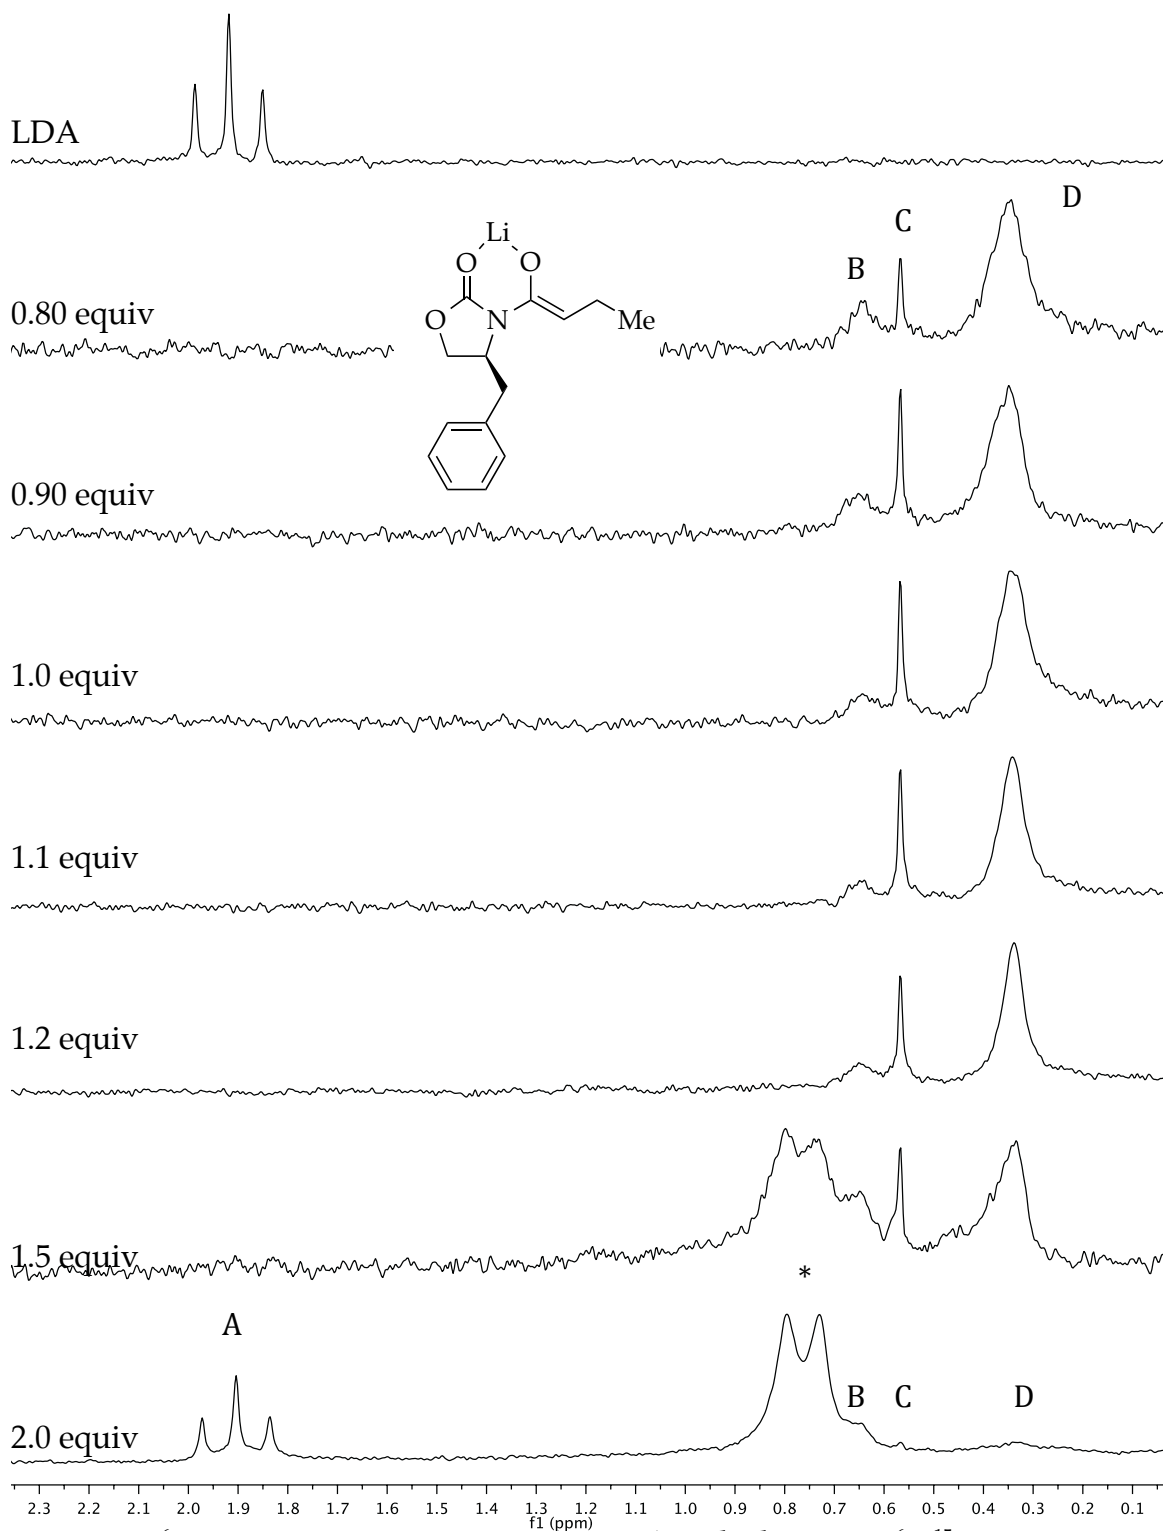

**Figure 68.**  ${}^6\text{Li}$  NMR spectra of **6** (0.20 M) with changing  $[\text{Li}^{15}\text{N}]\text{LDA}$  ratio to the oxazolidinone (as labeled) in THF at  $-60\text{ }^\circ\text{C}$ . **A** is free LDA; **B** is an unidentified dimeric species; **C** is the unsolvated tetramer; **D** is the coalesced trisolvated dimers. The mixed aggregate is labeled \*.

## Part 5: Dimer Computations

---

Geometries are optimized at the B3LYP level of theory using the 6-31G(d) basis set. Energies are defined as follows:  $G$  is the sum of electronic and thermal free energies calculated at the B3LYP level of theory ( $T = 195$  K).  $G_{\text{MP2}}$  is derived from an MP2 SP calculation corresponding to the DFT-optimized geometry and includes a thermal correction from the DFT calculation.

**Table 1.** Geometric coordinates and thermally corrected MP2 energies for tetrahydrofuran (THF)

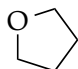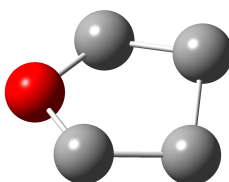

$G = -232.349382$  Hartree

$G_{\text{MP2}} = -145312.2903$  kcal/mol

| Atom | X           | Y           | Z           |
|------|-------------|-------------|-------------|
| C    | 0.00000000  | 0.00000000  | 0.00000000  |
| O    | 0.00000000  | 0.00000000  | 1.43133070  |
| C    | 1.34537191  | 0.00000000  | 1.92150203  |
| C    | 2.24870259  | -0.28439627 | 0.71435321  |
| C    | 1.43346820  | 0.33130215  | -0.43248249 |
| H    | 1.58213073  | 1.41736875  | -0.46518645 |
| H    | 1.68560870  | -0.07569023 | -1.41670971 |
| H    | 3.24887201  | 0.14691464  | 0.82158362  |
| H    | 2.35937654  | -1.36515207 | 0.56460786  |
| H    | 1.57260400  | 0.98256813  | 2.36334488  |
| H    | 1.43285191  | -0.75428594 | 2.71251317  |
| H    | -0.30387867 | -0.99259206 | -0.36803060 |
| H    | -0.73798112 | 0.73090835  | -0.35071740 |

**Table 2.** Geometric coordinates and thermally corrected MP2 energies for dimethylethylamine (DMEA)

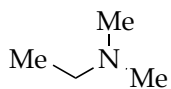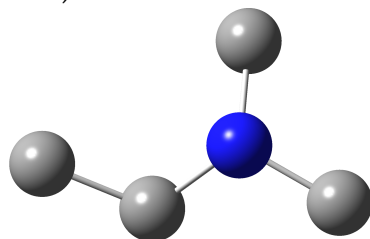

G = -213.656331 Hartree

G<sub>MP2</sub> = -133573.4354 kcal/mol

| Atom | X           | Y           | Z           |
|------|-------------|-------------|-------------|
| C    | 0.00000000  | 0.00000000  | 0.00000000  |
| H    | 0.00000000  | 0.00000000  | 1.09511810  |
| H    | 1.04043539  | 0.00000000  | -0.34193630 |
| H    | -0.47224561 | -0.93380791 | -0.32540421 |
| C    | -0.75205325 | 1.19677634  | -0.58416956 |
| H    | -0.81656889 | 1.07110229  | -1.67205850 |
| H    | -1.79673181 | 1.20085851  | -0.20762815 |
| N    | -0.09071955 | 2.47976222  | -0.33981037 |
| C    | -0.67790172 | 3.53649446  | -1.15184252 |
| H    | -1.74296806 | 3.73451525  | -0.91419588 |
| H    | -0.12224763 | 4.46891836  | -1.00194973 |
| H    | -0.61257345 | 3.26942003  | -2.21241151 |
| C    | -0.08827282 | 2.85432427  | 1.06791224  |
| H    | -1.10807776 | 2.97189950  | 1.48856739  |
| H    | 0.44004187  | 2.10512460  | 1.66424416  |
| H    | 0.43834518  | 3.80705756  | 1.19019208  |

**Table 3.** Geometric coordinates and thermally corrected MP2 energies for pyridine

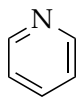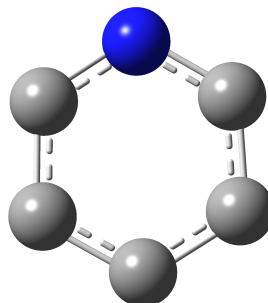

G = -248.212568 Hartree  
 $G_{\text{MP2}} = -155252.1531$  kcal/mol

| Atom | X           | Y           | Z           | Atom | X | Y | Z |
|------|-------------|-------------|-------------|------|---|---|---|
| C    | 0.00000000  | 0.00000000  | 0.00000000  |      |   |   |   |
| C    | 0.00000000  | 0.00000000  | 1.39609960  |      |   |   |   |
| C    | 1.22655027  | 0.00000000  | 2.05951808  |      |   |   |   |
| C    | 2.39559516  | -0.00004988 | 1.29934943  |      |   |   |   |
| C    | 2.28298997  | -0.00008897 | -0.09220166 |      |   |   |   |
| N    | 1.11328009  | -0.00003428 | -0.74460037 |      |   |   |   |
| H    | 3.17588827  | -0.00008126 | -0.71582762 |      |   |   |   |
| H    | 3.37453495  | -0.00004989 | 1.76972338  |      |   |   |   |
| H    | 1.27039061  | -0.00001990 | 3.14554958  |      |   |   |   |
| H    | -0.93779193 | 0.00002936  | 1.94392949  |      |   |   |   |
| H    | -0.94029065 | 0.00000213  | -0.54957532 |      |   |   |   |

**Table 4.** Geometric coordinates and thermally corrected MP2 energies for lithium diisopropylamide (LDA) with two THF

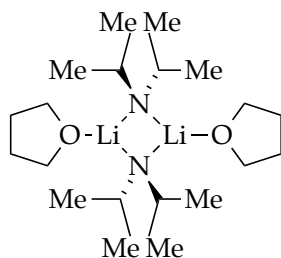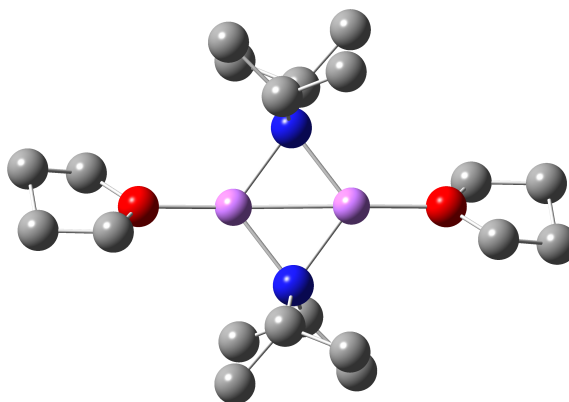

G = -1063.116483 Hartree

$G_{\text{MP2}} = -664731.8875$  kcal/mol

$\Delta G_{\text{MP2}} = 0$  kcal/mol vs. LDA with two THF

| Atom | X           | Y           | Z           | Atom | X           | Y           | Z           |
|------|-------------|-------------|-------------|------|-------------|-------------|-------------|
| Li   | 0.00000000  | 0.00000000  | 0.00000000  | C    | -1.01845863 | 2.50549465  | 0.96165094  |
| Li   | 0.00000000  | 0.00000000  | 2.39346480  | H    | -1.81410663 | 1.86918792  | 0.52758664  |
| O    | 0.40731818  | 0.00000000  | 4.33666642  | C    | -0.80797530 | 3.64048612  | -0.06969212 |
| C    | -0.31160577 | 0.75031532  | 5.34554741  | H    | -1.76144100 | 4.13531583  | -0.30044256 |
| C    | 0.59705523  | 0.76867204  | 6.57773040  | H    | -0.12686892 | 4.41415138  | 0.30277974  |
| C    | 1.38039926  | -0.54444431 | 6.42411418  | H    | -0.38833529 | 3.25131946  | -1.00453270 |
| C    | 1.58550803  | -0.61184065 | 4.91113852  | C    | -1.67694186 | 3.10542503  | 2.23352810  |
| H    | 1.66334155  | -1.62770125 | 4.51728807  | H    | -1.90764523 | 2.30725174  | 2.94980958  |
| H    | 2.46883665  | -0.03867321 | 4.59941701  | H    | -1.02725739 | 3.83103093  | 2.73422227  |
| H    | 0.77815914  | -1.39416582 | 6.76657132  | H    | -2.61874741 | 3.61787491  | 1.98945185  |
| H    | 2.32593881  | -0.55203312 | 6.97432432  | N    | -0.10056751 | -1.58942643 | 1.19475018  |
| H    | 0.02933285  | 0.82892055  | 7.51087129  | C    | -1.45024064 | -2.11026018 | 0.94660834  |
| H    | 1.27894121  | 1.62608966  | 6.53832804  | H    | -2.01730929 | -1.24034090 | 0.55530667  |
| H    | -0.52831103 | 1.74382359  | 4.94463141  | C    | -2.25393575 | -2.53615677 | 2.20621616  |
| H    | -1.25863823 | 0.23405677  | 5.54777776  | H    | -1.88302644 | -3.47070131 | 2.63922295  |
| N    | 0.10065090  | 1.58940008  | 1.19844710  | H    | -2.18688374 | -1.76102302 | 2.97989617  |
| C    | 1.45061143  | 2.11134115  | 1.44268300  | H    | -3.31687937 | -2.68187367 | 1.96567937  |
| H    | 2.01816461  | 1.24325327  | 1.83719553  | C    | -1.61016658 | -3.20211490 | -0.13915451 |
| C    | 2.25270052  | 2.53174806  | 0.18014310  | H    | -1.12639271 | -2.89814436 | -1.07426675 |
| H    | 1.88051137  | 3.46383384  | -0.25704450 | H    | -1.17230114 | -4.15778508 | 0.17079101  |
| H    | 3.31574980  | 2.67957908  | 0.41893210  | H    | -2.67263445 | -3.38625648 | -0.34991971 |
| H    | 2.18582944  | 1.75290378  | -0.58986241 | C    | 1.01809177  | -2.50661996 | 1.42936074  |
| C    | 1.61203409  | 3.20820544  | 2.52310583  | H    | 1.81259829  | -1.87278768 | 1.86904874  |
| H    | 2.67477213  | 3.39277027  | 2.73208364  | C    | 0.80533963  | -3.64782883 | 2.45331057  |
| H    | 1.17436550  | 4.16264437  | 2.20909523  | H    | 1.75848838  | -4.14330662 | 2.68391971  |
| H    | 1.12904002  | 2.90893149  | 3.46012848  | H    | 0.38259405  | -3.26483646 | 3.38929575  |

|   |             |             |             |
|---|-------------|-------------|-------------|
| H | 0.12597100  | -4.41975376 | 2.07408838  |
| C | 1.67956260  | -3.09907875 | 0.15550803  |
| H | 1.91199021  | -2.29654468 | -0.55533363 |
| H | 2.62077364  | -3.61310777 | 0.39856207  |
| H | 1.03082423  | -3.82148659 | -0.35101602 |
| O | -0.40911863 | 0.00065978  | -1.94291869 |
| C | 0.32168799  | -0.73329970 | -2.95513878 |
| C | -0.58918940 | -0.76559246 | -4.18524867 |
| C | -1.39441703 | 0.53377791  | -4.02789288 |
| C | -1.59749716 | 0.59561021  | -2.51430010 |
| H | -2.47134196 | 0.00877276  | -2.20145036 |
| H | -1.68988997 | 1.60970501  | -2.11891500 |
| H | -2.34108731 | 0.52609058  | -4.57613032 |
| H | -0.80739252 | 1.39406498  | -4.37035596 |
| H | -1.25623881 | -1.63457594 | -4.14535146 |
| H | -0.02267117 | -0.81489229 | -5.11976866 |
| H | 1.25848431  | -0.19892221 | -3.15816049 |
| H | 0.55777425  | -1.72358252 | -2.55713091 |



**Table 5.** Geometric coordinates and thermally corrected MP2 energies for lithium diisopropylamide (LDA) with three THF

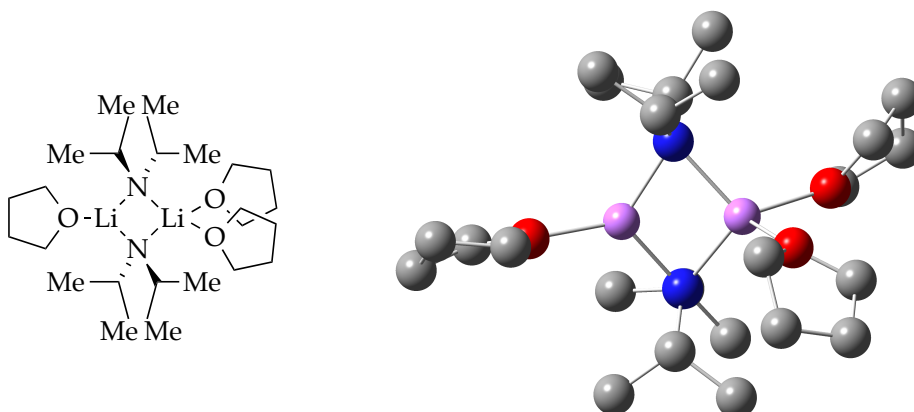

G = -1295.457144 Hartree

$G_{\text{MP2}} = -810047.7434$  kcal/mol

$\Delta G_{\text{MP2}} = 3.1782826016$  kcal/mol Li vs. LDA with two THF

| Atom | X           | Y           | Z           | Atom | X           | Y           | Z           |
|------|-------------|-------------|-------------|------|-------------|-------------|-------------|
| Li   | 0.00000000  | 0.00000000  | 0.00000000  | C    | 0.87396292  | 2.59274373  | 1.48807260  |
| Li   | 0.00000000  | 0.00000000  | 2.45078330  | H    | 1.78043899  | 1.98652108  | 1.68124104  |
| O    | 0.76848937  | 0.00000000  | 4.30278586  | C    | 0.77918167  | 3.54715730  | 2.70523038  |
| C    | 0.05243812  | -0.35287502 | 5.51009161  | H    | 1.71765290  | 4.10407928  | 2.83848508  |
| C    | 1.11422368  | -0.45211071 | 6.60812890  | H    | -0.01888713 | 4.28875034  | 2.58550450  |
| C    | 2.17114282  | 0.55481747  | 6.12871645  | H    | 0.57842436  | 2.98566993  | 3.62498842  |
| C    | 2.13508612  | 0.35175362  | 4.61320781  | C    | 1.24139344  | 3.42678721  | 0.22977099  |
| H    | 2.79028845  | -0.47253419 | 4.30113315  | H    | 2.19772141  | 3.95284251  | 0.36841242  |
| H    | 2.39179147  | 1.24830037  | 4.04276424  | H    | 1.33774558  | 2.76556180  | -0.63844292 |
| H    | 3.16444475  | 0.37560221  | 6.55080826  | H    | 0.48501595  | 4.18369996  | -0.00254504 |
| H    | 1.87004522  | 1.57765157  | 6.38325687  | N    | -0.25366108 | -1.60431767 | 1.31017524  |
| H    | 1.53710581  | -1.46288735 | 6.64154945  | C    | 0.87520412  | -2.52278726 | 1.47978528  |
| H    | 0.71085645  | -0.21919600 | 7.59797483  | H    | 1.75531864  | -1.85587890 | 1.56596750  |
| H    | -0.67928690 | 0.43691403  | 5.72176425  | C    | 1.21661426  | -3.44459026 | 0.27503715  |
| H    | -0.48028717 | -1.29042714 | 5.32984533  | H    | 0.53724126  | -4.29906012 | 0.19391347  |
| N    | -0.19534554 | 1.60798289  | 1.31467744  | H    | 1.15805401  | -2.88047618 | -0.66097787 |
| C    | -1.59788117 | 2.04176334  | 1.34755746  | H    | 2.23471964  | -3.85053501 | 0.37206069  |
| H    | -2.16178708 | 1.19414653  | 0.91652556  | C    | 0.90531948  | -3.38541981 | 2.76791260  |
| C    | -2.22078099 | 2.22361708  | 2.76351605  | H    | 0.72978567  | -2.76527871 | 3.65396372  |
| H    | -1.82397492 | 3.10090503  | 3.28491552  | H    | 0.14436086  | -4.17435134 | 2.74920223  |
| H    | -3.31297535 | 2.33840191  | 2.70356366  | H    | 1.87998218  | -3.88108949 | 2.88395713  |
| H    | -2.01776593 | 1.34556453  | 3.39085105  | C    | -1.62658338 | -2.11916070 | 1.35672220  |
| C    | -2.00114156 | 3.26349110  | 0.48627836  | H    | -2.24331366 | -1.30390211 | 0.93829073  |
| H    | -3.09486828 | 3.36313536  | 0.44607513  | C    | -1.96121547 | -3.35852925 | 0.49163073  |
| H    | -1.60883639 | 4.20305691  | 0.89221339  | H    | -3.04868555 | -3.50416451 | 0.42872341  |
| H    | -1.63046072 | 3.16352344  | -0.53908621 | H    | -1.57074509 | -3.24567616 | -0.52574629 |

|   |             |             |             |
|---|-------------|-------------|-------------|
| H | -1.53924533 | -4.27923938 | 0.91121265  |
| C | -2.22377918 | -2.34407340 | 2.77599811  |
| H | -2.08948575 | -1.44715473 | 3.39450064  |
| H | -3.30356843 | -2.54666983 | 2.72376310  |
| H | -1.75524499 | -3.18474975 | 3.29900739  |
| O | -1.15155293 | 0.09363755  | -1.75805537 |
| C | -0.94439464 | 1.17511625  | -2.69666931 |
| C | -2.32736717 | 1.52442690  | -3.25206981 |
| C | -3.05462874 | 0.17383777  | -3.17010425 |
| C | -2.51023443 | -0.39140314 | -1.85809408 |
| H | -2.48463392 | -1.48267101 | -1.81948503 |
| H | -3.08227608 | -0.02301176 | -0.99700184 |
| H | -2.77067747 | -0.46776232 | -4.01313308 |
| H | -4.14487881 | 0.26640316  | -3.16470015 |
| H | -2.27799881 | 1.93290062  | -4.26609137 |
| H | -2.82180009 | 2.26210740  | -2.61002493 |
| H | -0.46078200 | 1.99956632  | -2.16721399 |
| H | -0.27327676 | 0.82195565  | -3.49033079 |
| O | 1.84177836  | -0.02817632 | -1.08782613 |
| C | 2.05959584  | -0.70137110 | -2.33887026 |
| C | 3.42785626  | -1.41913872 | -2.22636360 |
| C | 3.98701297  | -0.94448183 | -0.86316610 |
| C | 3.13384936  | 0.28777262  | -0.55474108 |
| H | 3.53044028  | 1.18883439  | -1.04771899 |
| H | 3.00783801  | 0.49901453  | 0.50858217  |
| H | 5.05670128  | -0.71589085 | -0.89736731 |
| H | 3.82387115  | -1.70829567 | -0.09706728 |
| H | 4.08418386  | -1.12814200 | -3.05269242 |
| H | 3.31913055  | -2.50648299 | -2.25671413 |
| H | 1.21399764  | -1.37498804 | -2.48969236 |
| H | 2.06952050  | 0.03896514  | -3.15129439 |

**Table 6.** Geometric coordinates and thermally corrected MP2 energies for **10** dimer with three THF

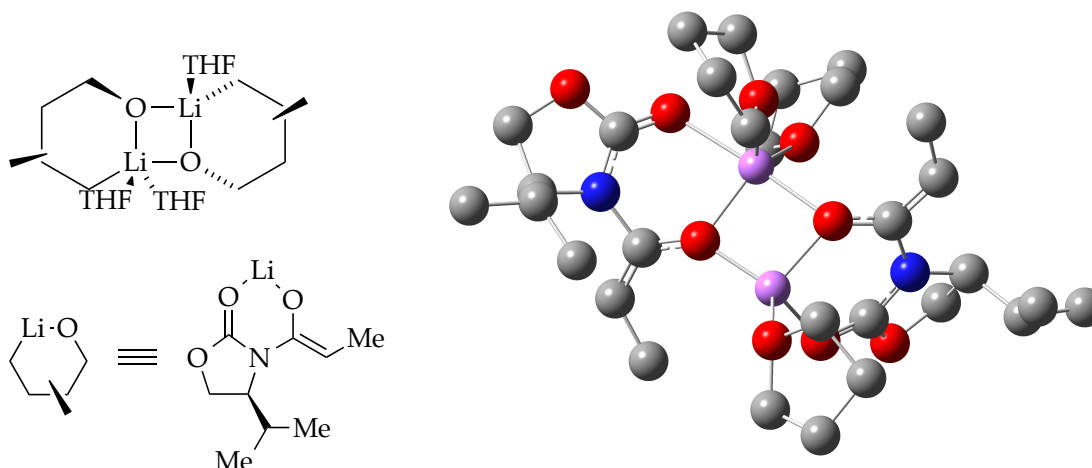

$G = -1975.555867$  Hartree

$G_{\text{MP2}} = -1235703.674$  kcal/mol

$\Delta G_{\text{MP2}} = 0$  kcal/mol vs. **10** dimer with three THF

| Atom | X           | Y           | Z           | Atom | X           | Y           | Z           |
|------|-------------|-------------|-------------|------|-------------|-------------|-------------|
| Li   | 0.00000000  | 0.00000000  | 0.00000000  | H    | -5.31848362 | -1.35816036 | -0.82029480 |
| O    | 0.00000000  | 0.00000000  | 2.09538850  | H    | -4.04889854 | -0.29429750 | -0.20125164 |
| C    | 1.00759653  | 0.00000000  | 2.90760053  | H    | -5.68943209 | 0.33531466  | -0.45260323 |
| N    | 1.38005480  | -1.32373460 | 3.43891985  | C    | -5.85393549 | 0.08615589  | -3.15910380 |
| C    | 2.65811165  | -1.64616838 | 4.09989224  | H    | -6.59815680 | 0.76801996  | -2.73328539 |
| C    | 2.87921840  | -3.05665798 | 3.53476642  | H    | -5.66954657 | 0.40744685  | -4.19096415 |
| H    | 3.39305766  | -3.04368291 | 2.56622248  | H    | -6.30606405 | -0.91347606 | -3.19678916 |
| H    | 3.39284972  | -3.73870655 | 4.21380966  | C    | -2.50222909 | -3.07881323 | -1.04119118 |
| O    | 1.54161754  | -3.55460899 | 3.34226257  | C    | -2.46681311 | -4.05573926 | 0.09932117  |
| C    | 0.71587370  | -2.48292820 | 3.15277617  | H    | -3.46622937 | -4.24447870 | 0.52530196  |
| O    | -0.44884172 | -2.66437721 | 2.81349445  | H    | -2.08123614 | -5.03153538 | -0.22671321 |
| Li   | -1.40302230 | -1.24180187 | 1.90212328  | H    | -1.82081487 | -3.70807624 | 0.91080992  |
| O    | -1.58679132 | -1.14075907 | 0.04638654  | H    | -2.87889909 | -3.43737079 | -1.99587539 |
| C    | -2.09997976 | -1.78877575 | -0.95916511 | O    | -3.00789069 | -0.87722828 | 3.07084176  |
| N    | -2.27156557 | -0.97773833 | -2.17300392 | C    | -3.59579500 | -1.99181490 | 3.78746380  |
| C    | -3.50520570 | -0.82928926 | -2.95369726 | C    | -3.83758907 | -1.50152118 | 5.22347850  |
| C    | -2.91386763 | -0.21904667 | -4.24398314 | C    | -2.82165463 | -0.35577067 | 5.36296843  |
| H    | -2.69457186 | -0.98273852 | -4.99934651 | C    | -2.84184266 | 0.24797089  | 3.96060321  |
| H    | -3.53469360 | 0.55993796  | -4.68904429 | H    | -1.91788042 | 0.75385779  | 3.67141163  |
| O    | -1.67338673 | 0.38794067  | -3.83481295 | H    | -3.69031690 | 0.93637060  | 3.83457129  |
| C    | -1.27002753 | -0.21267663 | -2.66994045 | H    | -1.82393309 | -0.75032355 | 5.58756705  |
| O    | -0.14785624 | -0.02860978 | -2.21513578 | H    | -3.08913854 | 0.36779776  | 6.13928300  |
| H    | -3.94022690 | -1.81445501 | -3.15214073 | H    | -3.69573314 | -2.29759079 | 5.96049854  |
| C    | -4.58026628 | 0.07351206  | -2.29667560 | H    | -4.85870164 | -1.11783511 | 5.33458756  |
| H    | -4.16612782 | 1.09369306  | -2.27145345 | H    | -4.51676704 | -2.28938720 | 3.27554262  |
| C    | -4.92217023 | -0.33645364 | -0.85692582 | H    | -2.88301488 | -2.82175680 | 3.75045306  |

|   |             |             |             |
|---|-------------|-------------|-------------|
| H | 3.42519755  | -0.94757040 | 3.75664831  |
| C | 2.58876842  | -1.67965667 | 5.65325446  |
| H | 2.00328250  | -2.57565374 | 5.91041831  |
| C | 4.00138012  | -1.84598551 | 6.23793817  |
| H | 3.95706011  | -1.95823619 | 7.32683929  |
| H | 4.52464234  | -2.72335464 | 5.84015303  |
| H | 4.61723144  | -0.96367838 | 6.02114182  |
| C | 1.88519262  | -0.47867842 | 6.29875845  |
| H | 2.47995312  | 0.43683668  | 6.21053772  |
| H | 0.91094711  | -0.28525083 | 5.84219961  |
| H | 1.73362690  | -0.67259171 | 7.36753185  |
| C | 1.76434845  | 1.06718679  | 3.28619372  |
| H | 2.55288207  | 0.94295598  | 4.01695117  |
| C | 1.50508096  | 2.46344098  | 2.79040115  |
| H | 0.94347433  | 2.44766608  | 1.85241465  |
| H | 0.93230836  | 3.07226835  | 3.51065974  |
| H | 2.44491477  | 3.00500657  | 2.61190860  |
| O | 1.94914965  | -0.65744943 | -0.20670993 |
| C | 3.01256990  | 0.31694066  | -0.20474241 |
| C | 4.22052182  | -0.40122255 | -0.80687286 |
| C | 3.54937300  | -1.32410926 | -1.83664783 |
| C | 2.26382230  | -1.73997640 | -1.11306394 |
| H | 2.40785027  | -2.65168739 | -0.51856118 |
| H | 1.41341426  | -1.87983207 | -1.78293212 |
| H | 4.16618052  | -2.18259251 | -2.12036323 |
| H | 3.30784339  | -0.76259312 | -2.74652853 |
| H | 4.73706033  | -0.99164851 | -0.03976983 |
| H | 4.94461791  | 0.29045467  | -1.24874590 |
| H | 2.71776138  | 1.17549369  | -0.82500899 |
| H | 3.14724944  | 0.65301123  | 0.82667332  |
| O | -0.39936641 | 2.07179659  | -0.14785380 |
| C | -1.62206858 | 2.49330024  | 0.50064368  |
| C | -2.15494815 | 3.68934161  | -0.31069300 |
| C | -1.42701649 | 3.54971513  | -1.65906516 |
| C | -0.08325247 | 2.96865364  | -1.22504024 |
| H | 0.59349060  | 3.75709448  | -0.86145685 |
| H | 0.41625997  | 2.38328611  | -1.99842211 |
| H | -1.32730121 | 4.49864997  | -2.19569920 |
| H | -1.94086887 | 2.83734983  | -2.31421581 |
| H | -1.87937686 | 4.63489203  | 0.17077921  |
| H | -3.24508843 | 3.67079051  | -0.40585804 |
| H | -2.30479862 | 1.63813324  | 0.49248155  |
| H | -1.39900459 | 2.74946178  | 1.54095105  |

**Table 7.** Geometric coordinates and thermally corrected MP2 energies for **10** spirocyclic dimer with three THF

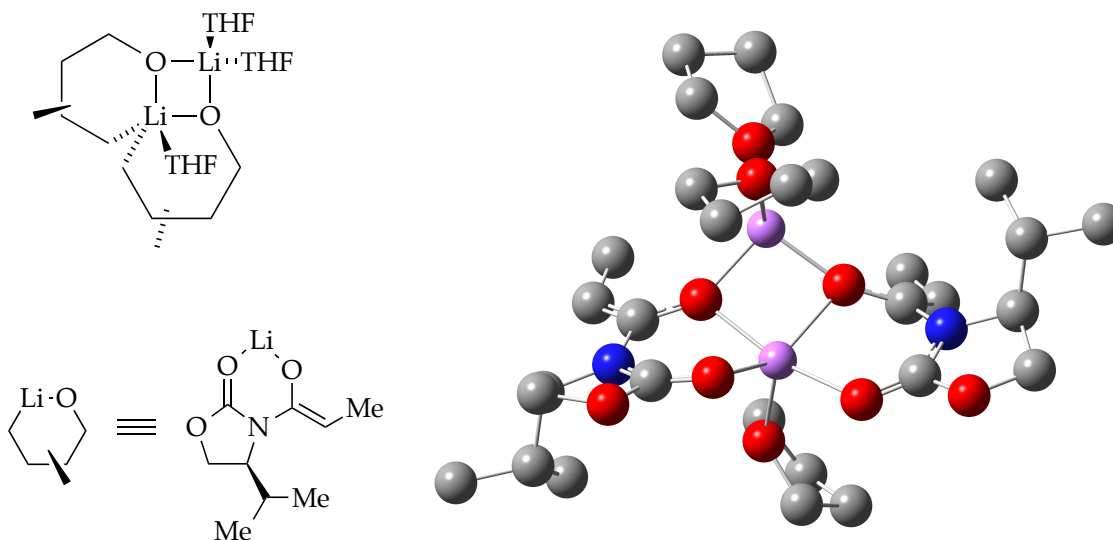

$G = -1975.552542$  Hartree

$G_{\text{MP2}} = -1235702.536$  kcal/mol

$\Delta G_{\text{MP2}} = 0.568762817$  kcal/mol Li vs. **10** dimer with three THF

| Atom | X          | Y           | Z           | Atom | X           | Y           | Z           |
|------|------------|-------------|-------------|------|-------------|-------------|-------------|
| Li   | 0.00000000 | 0.00000000  | 0.00000000  | H    | 3.87240175  | -2.49949474 | 2.73868255  |
| Li   | 0.00000000 | 0.00000000  | 2.65676290  | H    | 3.99131808  | -1.19044940 | 3.90968418  |
| O    | 1.42579464 | 0.00000000  | 1.44813489  | H    | 2.42000624  | -1.59264683 | 3.19318790  |
| C    | 2.69318422 | 0.10879627  | 1.21043699  | O    | -1.27944552 | -0.69365355 | 1.48801080  |
| N    | 3.02272606 | 1.04180219  | 0.13010379  | C    | -2.32055435 | -1.37630018 | 1.12433412  |
| C    | 2.10301636 | 1.82024965  | -0.52130958 | N    | -3.26692651 | -0.63238635 | 0.28134959  |
| O    | 0.89036530 | 1.70220099  | -0.61617484 | C    | -4.72842247 | -0.60697979 | 0.41314721  |
| O    | 2.74319268 | 2.85668521  | -1.15066610 | C    | -5.10436941 | -0.04249263 | -0.97728844 |
| C    | 4.11501898 | 2.86863809  | -0.71935063 | H    | -5.38149305 | -0.83421397 | -1.68319754 |
| H    | 4.21802132 | 3.56923665  | 0.11871275  | H    | -5.90034050 | 0.70334301  | -0.94714310 |
| H    | 4.72751354 | 3.20845182  | -1.55637500 | O    | -3.91580957 | 0.60481401  | -1.46155723 |
| C    | 4.37795537 | 1.41382443  | -0.30310616 | C    | -2.84221626 | 0.11143820  | -0.77573925 |
| H    | 5.06212132 | 1.36437205  | 0.54762389  | O    | -1.69732618 | 0.34582101  | -1.13534003 |
| C    | 4.92185162 | 0.58139536  | -1.49889292 | H    | -5.11223377 | -1.62626676 | 0.53006400  |
| H    | 4.39220790 | 0.94830340  | -2.39128678 | C    | -5.25498435 | 0.26126764  | 1.58392009  |
| C    | 4.65143793 | -0.92551767 | -1.40713551 | H    | -4.96449597 | 1.30020110  | 1.36369656  |
| H    | 5.17313674 | -1.38374695 | -0.56074560 | C    | -4.65607484 | -0.12637776 | 2.94328124  |
| H    | 3.58279087 | -1.12816363 | -1.29622969 | H    | -4.90664665 | -1.16121212 | 3.20511231  |
| H    | 5.00063722 | -1.41592299 | -2.32430931 | H    | -3.56791974 | -0.03503951 | 2.95122935  |
| C    | 6.42179032 | 0.86221531  | -1.68194397 | H    | -5.06144350 | 0.52524276  | 3.72734832  |
| H    | 6.80089883 | 0.37351343  | -2.58616753 | C    | -6.79016730 | 0.18629405  | 1.65004164  |
| H    | 6.64079492 | 1.93342239  | -1.77168175 | H    | -7.17047373 | 0.83287864  | 2.44838609  |
| H    | 6.99595697 | 0.47550649  | -0.82996126 | H    | -7.27462641 | 0.49983550  | 0.71832201  |
| C    | 3.71384134 | -0.51855567 | 1.85852269  | H    | -7.12025311 | -0.83749385 | 1.86982111  |
| H    | 4.73965502 | -0.35459232 | 1.55285600  | C    | -2.64357775 | -2.66436574 | 1.40397073  |
| C    | 3.48791711 | -1.49515884 | 2.97751417  | C    | -1.83920113 | -3.55229210 | 2.30824731  |

|   |             |             |             |
|---|-------------|-------------|-------------|
| H | -1.60232521 | -4.51598924 | 1.83403544  |
| H | -0.89255956 | -3.07397523 | 2.57653245  |
| H | -2.36860335 | -3.79305444 | 3.24491917  |
| H | -3.54734285 | -3.08101646 | 0.96785922  |
| O | -0.41963833 | 1.98442345  | 3.10811737  |
| C | -1.74384110 | 2.46875897  | 2.77152115  |
| C | -1.57204816 | 3.93115159  | 2.34201756  |
| C | -0.11816196 | 3.96143371  | 1.84439533  |
| C | 0.56228887  | 3.00328175  | 2.82009641  |
| H | 0.83783383  | 3.50968687  | 3.75740517  |
| H | 1.44105813  | 2.50086901  | 2.41100415  |
| H | 0.32211451  | 4.96355183  | 1.86413718  |
| H | -0.04831392 | 3.56656085  | 0.82615312  |
| H | -1.69936860 | 4.60378905  | 3.19914600  |
| H | -2.29444052 | 4.22209819  | 1.57355287  |
| H | -2.12913439 | 1.83993430  | 1.96325406  |
| H | -2.38849128 | 2.35082337  | 3.64948439  |
| O | 0.25845346  | -0.61596501 | 4.56065220  |
| C | -0.02928207 | -1.87610753 | 5.19959847  |
| C | 0.33426980  | -1.67719247 | 6.67128463  |
| C | 1.52399437  | -0.70969273 | 6.57080599  |
| C | 1.10820321  | 0.19447542  | 5.40651637  |
| H | 1.95266976  | 0.54587917  | 4.80682610  |
| H | 0.52786301  | 1.06082980  | 5.74419544  |
| H | 2.43932238  | -1.25790697 | 6.31998805  |
| H | 1.70547252  | -0.14627786 | 7.49104793  |
| H | 0.58014242  | -2.61770839 | 7.17345932  |
| H | -0.49774066 | -1.20848719 | 7.21037075  |
| H | -1.08276908 | -2.11002290 | 5.02834067  |
| H | 0.58458727  | -2.66123241 | 4.73808152  |
| O | 0.80558503  | -1.53668786 | -1.13115832 |
| C | 1.06994691  | -2.74441633 | -0.36968466 |
| C | 0.62389827  | -3.91798554 | -1.25600513 |
| C | -0.38561579 | -3.25551359 | -2.20766534 |
| C | 0.24941901  | -1.88228317 | -2.41407962 |
| H | -0.45358649 | -1.09305373 | -2.68626142 |
| H | 1.05525136  | -1.92561420 | -3.16242784 |
| H | -1.35652440 | -3.14676811 | -1.71077539 |
| H | -0.52806218 | -3.80541311 | -3.14361093 |
| H | 0.19154565  | -4.73455576 | -0.66979307 |
| H | 1.47153272  | -4.32216271 | -1.82284886 |
| H | 2.13420766  | -2.77044512 | -0.11603133 |
| H | 0.49110125  | -2.67851413 | 0.55461308  |

**Table 8.** Geometric coordinates and thermally corrected MP2 energies for **10** D<sub>2d</sub> tetramer

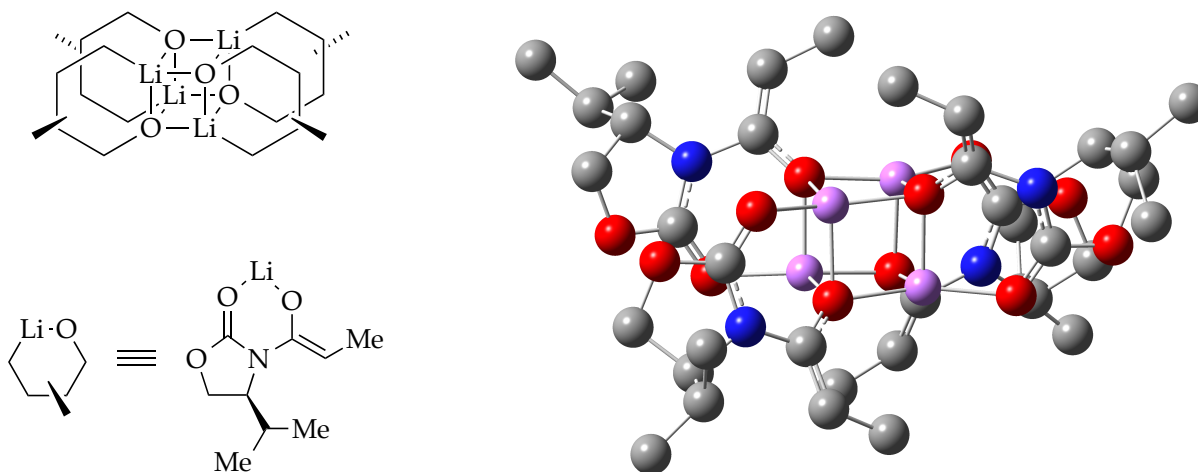

G = -2557.052041 Hartree

G<sub>MP2</sub> = -1599531.467 kcal/mol

ΔG<sub>MP2</sub> = 0.53453263 kcal/mol Li vs. **10** dimer with three THF

| Atom | X           | Y           | Z           | Atom | X           | Y           | Z           |
|------|-------------|-------------|-------------|------|-------------|-------------|-------------|
| Li   | 0.00000000  | 0.00000000  | 0.00000000  | C    | -1.28322963 | 1.66548900  | -2.11428320 |
| O    | 0.00000000  | 0.00000000  | 1.90431030  | C    | -2.51124346 | 1.81203379  | -1.56463394 |
| C    | 1.06056664  | 0.00000000  | 2.52461150  | H    | -3.17815228 | 2.57783436  | -1.93688088 |
| O    | 1.12404446  | -0.56766431 | 3.76019418  | C    | -2.99585821 | 0.98088527  | -0.40750049 |
| C    | 2.50653940  | -0.60311222 | 4.17898911  | H    | -2.53362807 | -0.01297514 | -0.39355384 |
| H    | 2.90294560  | -1.59695633 | 3.95104903  | H    | -2.78977109 | 1.44742350  | 0.56873066  |
| H    | 2.53126284  | -0.42782219 | 5.25526511  | H    | -4.08078495 | 0.82810957  | -0.46100570 |
| C    | 3.18084865  | 0.49976047  | 3.34601741  | O    | -0.36541643 | 0.80500138  | -1.73194704 |
| H    | 4.16988159  | 0.18280570  | 3.00224313  | Li   | -0.04943499 | -1.00198316 | -2.50528689 |
| N    | 2.27265708  | 0.52342754  | 2.18567012  | O    | -0.31190737 | -1.01873279 | -4.39210153 |
| C    | 2.66925567  | 0.88731244  | 0.83623963  | C    | 0.61760098  | -0.75572995 | -5.15148705 |
| C    | 3.77093228  | 1.65069749  | 0.64874663  | O    | 0.36480376  | -0.19559933 | -6.36565784 |
| H    | 4.30048131  | 2.05347946  | 1.50264962  | C    | 1.62282122  | 0.18847500  | -6.96401824 |
| C    | 4.29357523  | 2.00732434  | -0.71684046 | H    | 1.78497009  | 1.25008711  | -6.75601566 |
| H    | 3.85365681  | 2.93545016  | -1.11445376 | H    | 1.54171506  | 0.02567583  | -8.03946905 |
| H    | 5.37968311  | 2.15737757  | -0.69415423 | C    | 2.65944897  | -0.70872894 | -6.26792476 |
| H    | 4.09520491  | 1.21678746  | -1.45057685 | H    | 3.57676852  | -0.15342869 | -6.05073296 |
| O    | 1.91674595  | 0.37423421  | -0.11223207 | N    | 1.95673881  | -0.95778636 | -4.99676956 |
| Li   | 1.57793089  | 0.94525864  | -1.93801876 | C    | 2.61509433  | -1.20100167 | -3.72487599 |
| O    | 1.42593614  | 2.23628707  | -3.33430043 | C    | 3.88450722  | -1.66959061 | -3.71024775 |
| C    | 0.33118975  | 2.48068509  | -3.83361116 | H    | 4.37236964  | -1.93807596 | -4.63854789 |
| O    | 0.24747463  | 2.86078165  | -5.13934359 | C    | 4.66240293  | -1.87599377 | -2.43826040 |
| C    | -1.15037346 | 2.85297549  | -5.51678065 | H    | 4.49882584  | -2.87012935 | -1.99332191 |
| H    | -1.38364308 | 1.87057716  | -5.93828121 | H    | 5.74001042  | -1.78477039 | -2.61946736 |
| H    | -1.29083081 | 3.63180120  | -6.26694226 | H    | 4.40301856  | -1.13462886 | -1.67256832 |
| C    | -1.87110691 | 3.11983053  | -4.18777359 | O    | 1.90141107  | -0.87895679 | -2.66825319 |
| H    | -2.82936891 | 2.59704920  | -4.12948247 | Li   | 1.96915293  | -1.48937499 | -0.82499351 |
| N    | -0.91417462 | 2.46576984  | -3.27169108 | O    | 2.35854636  | -2.74621689 | 0.55463312  |

|   |             |             |             |   |            |            |            |
|---|-------------|-------------|-------------|---|------------|------------|------------|
| C | 1.44734403  | -3.22547855 | 1.22501688  | H | 5.34266158 | 1.42253137 | 4.77836980 |
| O | 1.67153431  | -3.58877928 | 2.51748804  | H | 4.54779907 | 2.75345787 | 5.63290101 |
| C | 0.40631164  | -3.93886226 | 3.12243490  | H | 4.08617485 | 1.08709122 | 5.98277780 |
| H | 0.04268566  | -3.06634882 | 3.67297142  |   |            |            |            |
| H | 0.58631307  | -4.76660302 | 3.80957563  |   |            |            |            |
| C | -0.49633136 | -4.29671127 | 1.92935530  |   |            |            |            |
| H | -1.50960042 | -3.90974078 | 2.07224646  |   |            |            |            |
| N | 0.15894178  | -3.50062282 | 0.87630279  |   |            |            |            |
| C | -0.52122719 | -2.92993688 | -0.27430563 |   |            |            |            |
| C | -1.66724853 | -3.49618502 | -0.71763670 |   |            |            |            |
| C | -2.47921666 | -2.92624814 | -1.84907271 |   |            |            |            |
| H | -2.39566407 | -1.83441234 | -1.90453082 |   |            |            |            |
| H | -2.18037964 | -3.32354899 | -2.83161506 |   |            |            |            |
| H | -3.54368792 | -3.15925543 | -1.72437905 |   |            |            |            |
| H | -2.02034488 | -4.41621089 | -0.26952370 |   |            |            |            |
| O | 0.04156922  | -1.84300031 | -0.75611664 |   |            |            |            |
| C | -0.57452848 | -5.81713598 | 1.62435290  |   |            |            |            |
| H | -1.12574976 | -5.91928603 | 0.68297544  |   |            |            |            |
| C | 0.79661541  | -6.47758502 | 1.41763336  |   |            |            |            |
| H | 1.35237546  | -6.00701067 | 0.59986337  |   |            |            |            |
| H | 1.41921135  | -6.43475115 | 2.31927310  |   |            |            |            |
| H | 0.66647163  | -7.53470203 | 1.16001610  |   |            |            |            |
| C | -1.39036264 | -6.53328146 | 2.71262160  |   |            |            |            |
| H | -2.38316094 | -6.08354516 | 2.83466468  |   |            |            |            |
| H | -1.53196277 | -7.58778322 | 2.45226562  |   |            |            |            |
| H | -0.88782270 | -6.50576844 | 3.68772199  |   |            |            |            |
| C | 3.02255517  | -1.99553508 | -7.05693510 |   |            |            |            |
| H | 3.64435656  | -2.60418736 | -6.39110724 |   |            |            |            |
| C | 1.80533263  | -2.84996724 | -7.44263809 |   |            |            |            |
| H | 1.23414240  | -3.15980059 | -6.56127749 |   |            |            |            |
| H | 1.12405973  | -2.32121235 | -8.11967965 |   |            |            |            |
| H | 2.13631292  | -3.75987727 | -7.95575763 |   |            |            |            |
| C | 3.87576774  | -1.63827180 | -8.28450885 |   |            |            |            |
| H | 4.76195111  | -1.05590412 | -8.00434050 |   |            |            |            |
| H | 4.22036764  | -2.54730580 | -8.78919797 |   |            |            |            |
| H | 3.31009313  | -1.05405527 | -9.02138163 |   |            |            |            |
| C | -2.04478831 | 4.64706959  | -3.95139945 |   |            |            |            |
| H | -1.10333888 | 5.11228727  | -4.28069496 |   |            |            |            |
| C | -3.18210552 | 5.18500536  | -4.83586974 |   |            |            |            |
| H | -4.14632761 | 4.75872036  | -4.53060228 |   |            |            |            |
| H | -3.25805168 | 6.27389250  | -4.74357701 |   |            |            |            |
| H | -3.03897326 | 4.95645477  | -5.89846140 |   |            |            |            |
| C | -2.26474755 | 5.06147273  | -2.49060589 |   |            |            |            |
| H | -3.25439083 | 4.76219986  | -2.12771649 |   |            |            |            |
| H | -1.51555654 | 4.62427653  | -1.82531679 |   |            |            |            |
| H | -2.20184989 | 6.15274915  | -2.40637036 |   |            |            |            |
| C | 3.31221016  | 1.86271200  | 4.07798751  |   |            |            |            |
| H | 3.66826651  | 2.58329057  | 3.33328460  |   |            |            |            |
| C | 1.98228223  | 2.40123859  | 4.62604162  |   |            |            |            |
| H | 1.23857147  | 2.52553601  | 3.83199766  |   |            |            |            |
| H | 1.55262294  | 1.74630178  | 5.39339022  |   |            |            |            |
| H | 2.13892171  | 3.38381011  | 5.08516906  |   |            |            |            |
| C | 4.38242056  | 1.77111361  | 5.17743533  |   |            |            |            |



**Table 9.** Geometric coordinates and thermally corrected MP2 energies for **10** S<sub>4</sub> tetramer

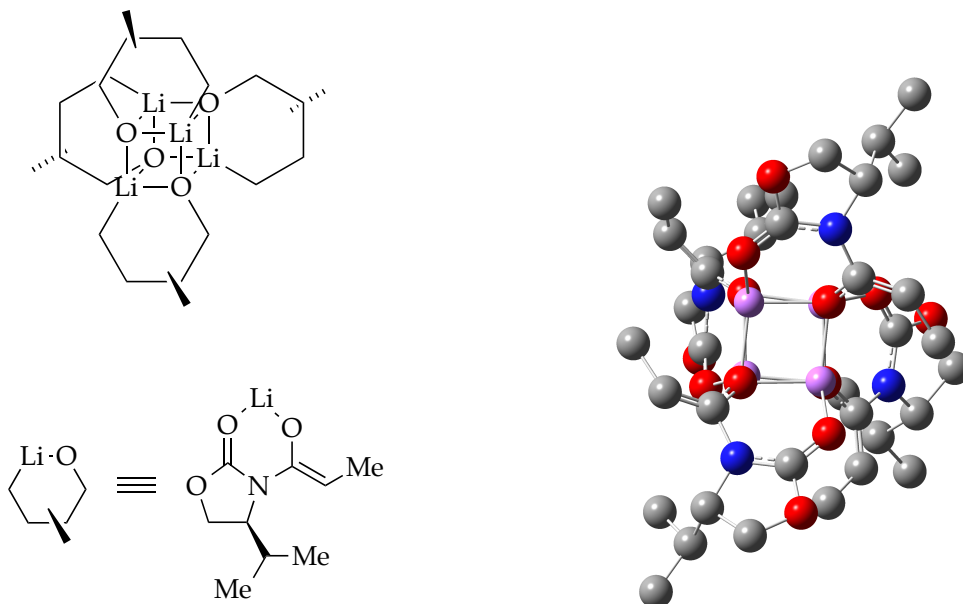

G = -2557.053052 Hartree

G<sub>MP2</sub> = -1599531.983 kcal/mol

ΔG<sub>MP2</sub> = 0.405721001 kcal/mol Li vs. **10** dimer with three THF

| Atom | X           | Y           | Z           | Atom | X           | Y           | Z           |
|------|-------------|-------------|-------------|------|-------------|-------------|-------------|
| Li   | 0.00000000  | 0.00000000  | 0.00000000  | O    | -0.84544025 | -5.45349744 | -1.67610379 |
| O    | 0.00000000  | 0.00000000  | 1.91500780  | C    | -2.27020570 | -5.65748562 | -1.61435655 |
| C    | 1.06008305  | 0.00000000  | 2.53560933  | H    | -2.51421622 | -6.09421494 | -0.63932396 |
| N    | 2.29572449  | -0.40347828 | 2.13077013  | H    | -2.53831680 | -6.35991733 | -2.40426094 |
| C    | 3.31241475  | -0.05156651 | 3.13793916  | C    | -2.87769651 | -4.25193196 | -1.79808775 |
| C    | 2.39931884  | 0.12407952  | 4.36608335  | H    | -3.72555485 | -4.10867785 | -1.12247261 |
| H    | 2.29648811  | -0.79999923 | 4.94636658  | N    | -1.73616700 | -3.43240975 | -1.35417303 |
| H    | 2.69874352  | 0.93797510  | 5.02729227  | C    | -1.81845652 | -2.05273635 | -0.89030842 |
| O    | 1.11132850  | 0.45957573  | 3.81365473  | O    | -0.81939770 | -1.28037156 | -1.27313032 |
| H    | 4.00114695  | -0.88790856 | 3.28271896  | Li   | -0.31754809 | -0.04069395 | -2.65427822 |
| C    | 4.11609769  | 1.23094232  | 2.80323746  | O    | -1.02189181 | 1.10317705  | -3.99578943 |
| H    | 3.41188985  | 2.07376771  | 2.87805830  | C    | -0.60795611 | 2.26069363  | -4.02972019 |
| C    | 4.70861860  | 1.23572976  | 1.38782427  | O    | -0.57108859 | 2.95288363  | -5.19540809 |
| H    | 5.39938045  | 0.39847964  | 1.23851583  | C    | -0.25954642 | 4.33050712  | -4.91175853 |
| H    | 3.93407995  | 1.16903409  | 0.61977410  | H    | -1.17817467 | 4.91670181  | -5.01935003 |
| H    | 5.26419926  | 2.16615241  | 1.22143147  | H    | 0.46669434  | 4.66209762  | -5.65529639 |
| C    | 5.22863746  | 1.43195280  | 3.84628715  | C    | 0.29182907  | 4.34970259  | -3.46328817 |
| H    | 5.75496889  | 2.37559222  | 3.66743847  | H    | -0.21528763 | 5.12256461  | -2.87563525 |
| H    | 4.84931529  | 1.45918063  | 4.87468794  | N    | -0.14239672 | 3.01938106  | -3.00517313 |
| H    | 5.96860369  | 0.62348338  | 3.78463652  | C    | -0.23352323 | 2.57809755  | -1.61077720 |
| C    | 2.54923120  | -1.11260226 | 0.88345490  | O    | 0.30141012  | 1.39600732  | -1.37690523 |
| O    | 1.83835738  | -0.69300595 | -0.14362961 | Li   | 2.03252629  | 0.49950367  | -1.64694503 |
| Li   | 1.03907565  | -1.95142186 | -1.42597316 | O    | 3.56850421  | 1.02006889  | -2.59287920 |
| O    | 0.57185909  | -3.78086874 | -1.18557003 | C    | 3.84215726  | 0.59974428  | -3.71413363 |
| C    | -0.58172111 | -4.15488448 | -1.37840513 | O    | 4.91242263  | 1.11890102  | -4.37304043 |

|   |             |             |             |   |             |             |             |
|---|-------------|-------------|-------------|---|-------------|-------------|-------------|
| C | 5.15618784  | 0.34820669  | -5.56027393 | H | -4.37986101 | -2.09120407 | -2.90711425 |
| H | 5.99448633  | -0.32952685 | -5.36544680 | H | -2.69997197 | -1.88500036 | -3.41726333 |
| H | 5.43201870  | 1.03703392  | -6.36031931 | H | -3.91963149 | -2.38185918 | -4.59474885 |
| C | 3.84209204  | -0.40988474 | -5.82019537 | C | 3.47344184  | -2.09685721 | 0.87825696  |
| H | 4.06724283  | -1.45287774 | -6.06146614 | H | 3.93159052  | -2.39506075 | 1.81587303  |
| N | 3.22397227  | -0.34334948 | -4.48266971 | C | 3.89427834  | -2.83457852 | -0.36308561 |
| C | 2.08429720  | -1.16613378 | -4.09112342 | H | 3.35897766  | -3.78641110 | -0.49063472 |
| O | 1.47149221  | -0.79499918 | -2.98896040 | H | 3.71283642  | -2.23506461 | -1.26334609 |
| C | 1.74892371  | -2.21579229 | -4.87982667 | H | 4.96638725  | -3.06874987 | -0.33727682 |
| H | 2.35602438  | -2.45758844 | -5.74341376 |   |             |             |             |
| C | 0.55775621  | -3.09758894 | -4.63210761 |   |             |             |             |
| H | -0.14470321 | -2.63066827 | -3.93512437 |   |             |             |             |
| H | 0.01486620  | -3.29353582 | -5.56688646 |   |             |             |             |
| H | 0.83496961  | -4.07532380 | -4.21174458 |   |             |             |             |
| C | 2.95004077  | 0.17585408  | -6.94250181 |   |             |             |             |
| H | 2.00947994  | -0.38469082 | -6.89791975 |   |             |             |             |
| C | 3.58936222  | -0.08212567 | -8.31552347 |   |             |             |             |
| H | 2.92003783  | 0.24720981  | -9.11752556 |   |             |             |             |
| H | 4.53452363  | 0.46304775  | -8.43805399 |   |             |             |             |
| H | 3.79549311  | -1.14816231 | -8.47167445 |   |             |             |             |
| C | 2.61411774  | 1.66041330  | -6.74335693 |   |             |             |             |
| H | 2.09733451  | 1.82954156  | -5.79373717 |   |             |             |             |
| H | 3.50887299  | 2.29539878  | -6.76916749 |   |             |             |             |
| H | 1.94484253  | 2.00245867  | -7.54025373 |   |             |             |             |
| C | -0.83565730 | 3.42000004  | -0.74455476 |   |             |             |             |
| H | -1.27525819 | 4.32877782  | -1.14696489 |   |             |             |             |
| C | -0.94483429 | 3.21635091  | 0.73821814  |   |             |             |             |
| H | -0.36095757 | 2.35856425  | 1.08073443  |   |             |             |             |
| H | -0.59057646 | 4.10050327  | 1.28755183  |   |             |             |             |
| H | -1.98392273 | 3.04675933  | 1.05552967  |   |             |             |             |
| C | 1.81817994  | 4.59753365  | -3.39147638 |   |             |             |             |
| H | 2.29695223  | 3.87299657  | -4.06702271 |   |             |             |             |
| C | 2.13857509  | 6.01869346  | -3.88795313 |   |             |             |             |
| H | 3.22053385  | 6.18750484  | -3.87867205 |   |             |             |             |
| H | 1.78822665  | 6.20784975  | -4.90928785 |   |             |             |             |
| H | 1.68162067  | 6.77225706  | -3.23320875 |   |             |             |             |
| C | 2.40114333  | 4.39682972  | -1.98604324 |   |             |             |             |
| H | 1.93449873  | 5.07694458  | -1.26326094 |   |             |             |             |
| H | 2.26642522  | 3.37465778  | -1.62843601 |   |             |             |             |
| H | 3.47758175  | 4.60209763  | -2.00044899 |   |             |             |             |
| C | -2.88500515 | -1.68757584 | -0.14841784 |   |             |             |             |
| H | -3.59521684 | -2.44893130 | 0.15872636  |   |             |             |             |
| C | -3.14779906 | -0.27711150 | 0.30151259  |   |             |             |             |
| H | -2.82042552 | -0.09812126 | 1.33562236  |   |             |             |             |
| H | -2.63173465 | 0.45031102  | -0.33626468 |   |             |             |             |
| H | -4.21986156 | -0.04441674 | 0.25907733  |   |             |             |             |
| C | -3.33126327 | -3.97963986 | -3.25509447 |   |             |             |             |
| H | -2.51468746 | -4.31776259 | -3.91067794 |   |             |             |             |
| C | -4.58721525 | -4.81079832 | -3.56953615 |   |             |             |             |
| H | -4.87947062 | -4.67835267 | -4.61664032 |   |             |             |             |
| H | -4.44267887 | -5.88502097 | -3.40418144 |   |             |             |             |
| H | -5.43179688 | -4.48767309 | -2.94724944 |   |             |             |             |
| C | -3.59451646 | -2.49743493 | -3.55414114 |   |             |             |             |

**Table 10.** Geometric coordinates and thermally corrected MP2 energies for 7 dimer with one THF

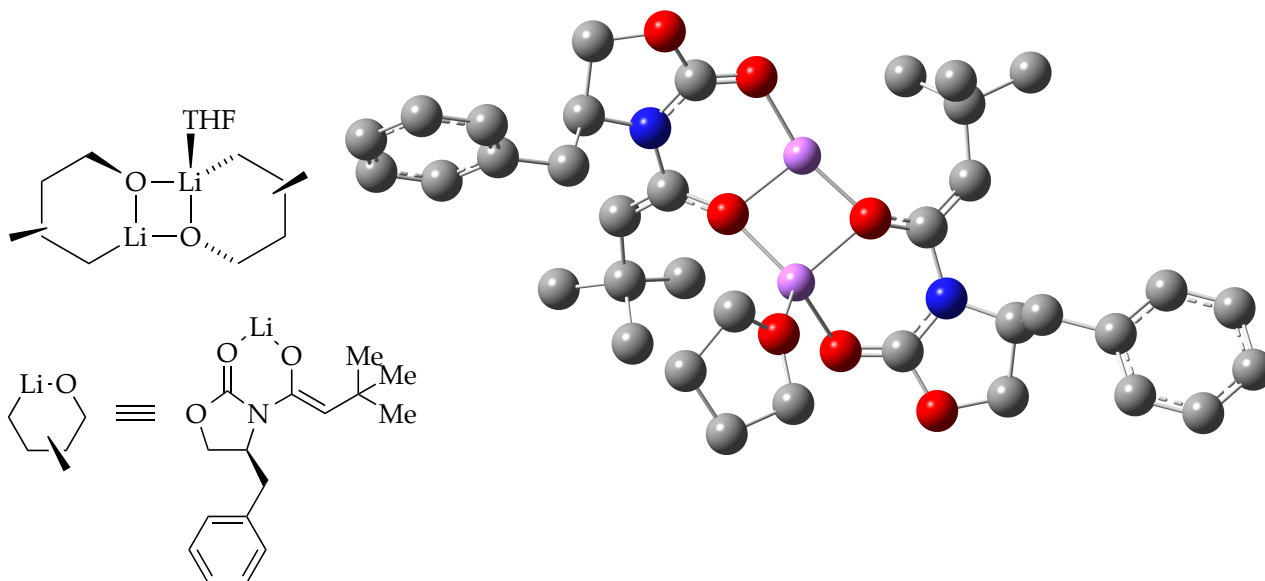

G = -2051.379484 Hartree

G<sub>MP2</sub> = -1283129.296 kcal/mol

ΔG<sub>MP2</sub> = 5.0148607 kcal/mol Li vs. 7 dimer with two THF

| Atom | X          | Y           | Z           | Atom | X           | Y           | Z           |
|------|------------|-------------|-------------|------|-------------|-------------|-------------|
| Li   | 0.00000000 | 0.00000000  | 0.00000000  | H    | 4.87258049  | -4.57413317 | 0.95957619  |
| O    | 0.00000000 | 0.00000000  | 1.92260770  | H    | 5.50770081  | -4.53773435 | -0.69576575 |
| C    | 1.09396447 | 0.00000000  | 2.48293739  | O    | 1.72609290  | -0.87935987 | -0.15136577 |
| O    | 1.25846683 | 0.66394343  | 3.66060471  | Li   | 1.00249923  | -1.53275845 | -1.70832712 |
| C    | 2.55341986 | 0.33614194  | 4.19965109  | O    | 0.91219292  | -2.04924331 | -3.51136410 |
| H    | 2.42093194 | -0.42949517 | 4.97185969  | C    | -0.11763020 | -1.81504192 | -4.14482585 |
| H    | 2.97846839 | 1.23460102  | 4.65012190  | O    | -0.10162706 | -1.81864943 | -5.50234133 |
| C    | 3.35629479 | -0.18663605 | 2.99631529  | C    | -1.45818975 | -1.73864050 | -5.98194037 |
| H    | 3.94862897 | -1.05635945 | 3.28826229  | H    | -1.77664364 | -2.74364541 | -6.27866537 |
| N    | 2.26128616 | -0.58310882 | 2.10094156  | H    | -1.47848455 | -1.08184224 | -6.85307025 |
| C    | 2.46622009 | -1.29622629 | 0.83506967  | C    | -2.26861514 | -1.20045602 | -4.78837251 |
| C    | 3.41567838 | -2.26681380 | 0.84736800  | H    | -3.20889295 | -1.74848750 | -4.69253538 |
| H    | 3.85869420 | -2.51621986 | 1.80664564  | N    | -1.36383211 | -1.53497047 | -3.68176675 |
| C    | 3.89489060 | -3.09932494 | -0.33562722 | C    | -1.70174848 | -1.35366292 | -2.26119908 |
| C    | 4.32724685 | -2.21309120 | -1.52539714 | C    | -2.96215988 | -1.69347051 | -1.89546733 |
| H    | 5.15260358 | -1.55388832 | -1.23122780 | C    | -3.57081445 | -1.55511527 | -0.50515285 |
| H    | 4.66601585 | -2.82921152 | -2.36811692 | C    | -2.78473034 | -2.38646692 | 0.53482858  |
| H    | 3.51336411 | -1.57539799 | -1.88203386 | H    | -1.74400169 | -2.05838253 | 0.60262535  |
| C    | 2.80623949 | -4.10123256 | -0.78998497 | H    | -3.23485060 | -2.29322837 | 1.53207146  |
| H    | 1.88433724 | -3.59690389 | -1.10016132 | H    | -2.78582143 | -3.44766723 | 0.25897970  |
| H    | 3.15120142 | -4.70488604 | -1.63977480 | C    | -3.61494068 | -0.07521407 | -0.05895212 |
| H    | 2.53999478 | -4.77990263 | 0.02835115  | H    | -4.22824713 | 0.51780626  | -0.74941712 |
| C    | 5.12475882 | -3.91346293 | 0.12056622  | H    | -4.04952288 | 0.01752727  | 0.94520260  |
| H    | 5.93542550 | -3.24980172 | 0.44656827  | H    | -2.61432398 | 0.36611773  | -0.03492063 |

|   |             |             |             |
|---|-------------|-------------|-------------|
| C | -5.01861784 | -2.08588391 | -0.55883741 |
| H | -5.62190864 | -1.51968455 | -1.28029880 |
| H | -5.04080615 | -3.14140294 | -0.85720556 |
| H | -5.50226982 | -2.00330424 | 0.42189940  |
| H | -3.59523025 | -2.14869051 | -2.65143057 |
| O | -0.73434614 | -0.86584415 | -1.53685445 |
| C | -2.56910999 | 0.31491169  | -4.84757215 |
| H | -2.93308509 | 0.60654801  | -3.85570261 |
| H | -1.62873032 | 0.85170139  | -5.02452895 |
| C | -3.58820544 | 0.66978912  | -5.90766597 |
| C | -3.20240556 | 1.25525763  | -7.12082261 |
| C | -4.14599497 | 1.55267486  | -8.10660555 |
| C | -5.49470304 | 1.26752326  | -7.89263213 |
| C | -5.89394704 | 0.68761778  | -6.68599512 |
| C | -4.94880237 | 0.39297591  | -5.70398252 |
| H | -5.26878074 | -0.04857253 | -4.76222105 |
| H | -6.94364703 | 0.46970336  | -6.50736304 |
| H | -6.23099809 | 1.49982556  | -8.65722894 |
| H | -3.82610797 | 2.01090030  | -9.03876848 |
| H | -2.15406907 | 1.49237183  | -7.29047761 |
| C | 4.28266588  | 0.86148647  | 2.33747735  |
| H | 4.60053118  | 0.44724756  | 1.37415722  |
| H | 3.69660541  | 1.76459345  | 2.12696788  |
| C | 5.48583085  | 1.19667985  | 3.19081945  |
| C | 6.54906507  | 0.28778325  | 3.30470830  |
| C | 7.65033795  | 0.57119987  | 4.11158128  |
| C | 7.71021191  | 1.77379699  | 4.82008763  |
| C | 6.66309194  | 2.68912286  | 4.71206911  |
| C | 5.56109924  | 2.40050252  | 3.90394241  |
| H | 4.75422861  | 3.12517793  | 3.81536134  |
| H | 6.70360750  | 3.63110231  | 5.25282023  |
| H | 8.56960929  | 1.99693715  | 5.44652287  |
| H | 8.46564381  | -0.14404283 | 4.18261384  |
| H | 6.51569131  | -0.64515602 | 2.74544962  |
| O | -0.18737861 | 1.96082510  | -0.34823997 |
| C | -0.51100878 | 2.51906603  | -1.62846383 |
| C | -1.72477424 | 3.42725703  | -1.36801758 |
| C | -1.57826687 | 3.81993134  | 0.12943390  |
| C | -0.34834708 | 3.02059914  | 0.60688354  |
| H | -0.46052265 | 2.55601137  | 1.58711864  |
| H | 0.55703435  | 3.64564154  | 0.60390595  |
| H | -2.47078188 | 3.53554137  | 0.69361484  |
| H | -1.42912210 | 4.89527544  | 0.26591359  |
| H | -2.65440759 | 2.87398286  | -1.52885774 |
| H | -1.73203072 | 4.29531215  | -2.03411383 |
| H | 0.34929668  | 3.09602838  | -2.00014618 |
| H | -0.70238483 | 1.68152173  | -2.30058349 |

**Table 11.** Geometric coordinates and thermally corrected MP2 energies for 7 dimer with two THF

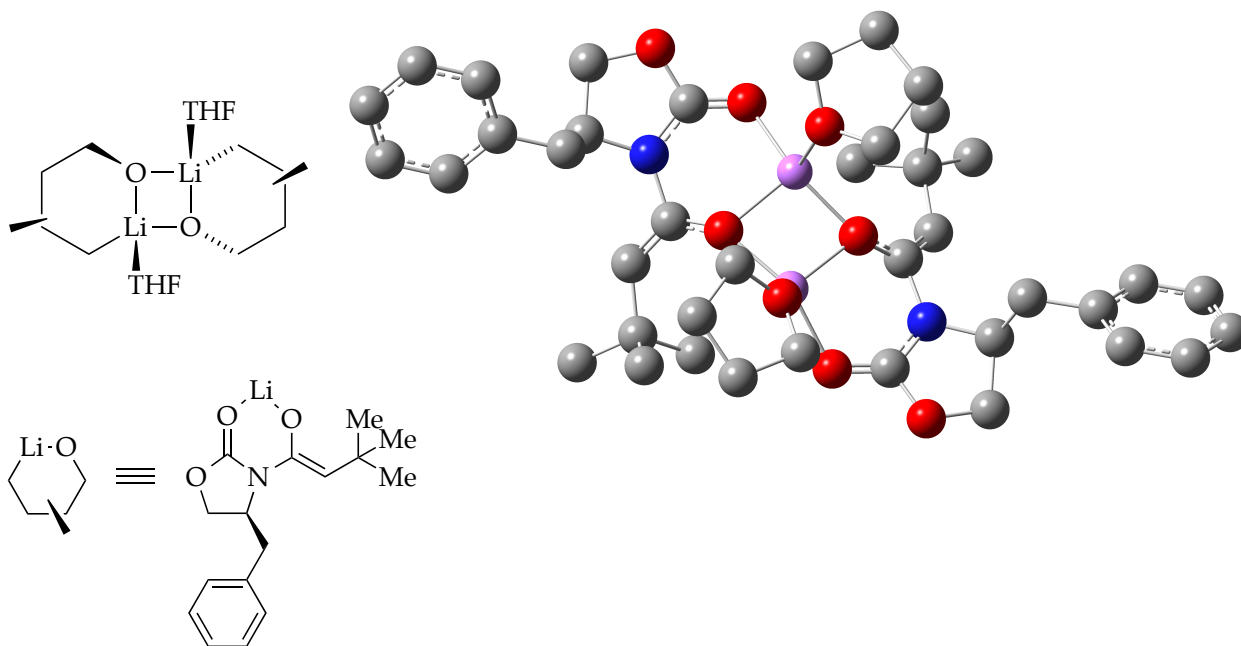

$G = -2283.730227$  Hartree

$G_{\text{MP2}} = -1428451.616$  kcal/mol

$\Delta G_{\text{MP2}} = 0$  kcal/mol Li vs. 7 dimer with two THF

| Atom | X           | Y           | Z           | Atom | X            | Y           | Z           |
|------|-------------|-------------|-------------|------|--------------|-------------|-------------|
| C    | 0.0000000   | 0.0000000   | 0.0000000   | C    | -4.66925269  | -4.41904120 | -0.01401512 |
| H    | 0.0000000   | 0.0000000   | 1.09537450  | H    | -3.72182571  | -4.93635951 | -0.21296859 |
| H    | 1.03011798  | 0.0000000   | -0.36064894 | H    | -4.68132760  | -4.13564370 | 1.04589756  |
| C    | -0.85531882 | -1.14218826 | -0.57896199 | H    | -5.48499639  | -5.13317415 | -0.17996165 |
| H    | -0.99817980 | -1.92532402 | 0.16931261  | Li   | -5.51424410  | -0.37042111 | -3.35667891 |
| N    | -2.11413144 | -0.43051174 | -0.82592207 | O    | -7.35468906  | -0.88387963 | -3.64729111 |
| C    | -1.92225781 | 0.91152408  | -0.81372251 | C    | -8.16261886  | 0.01186076  | -3.88525048 |
| O    | -0.64215527 | 1.20815025  | -0.45228537 | O    | -9.22663135  | -0.22070833 | -4.70443802 |
| O    | -2.71645939 | 1.81132643  | -1.08076626 | C    | -10.11060631 | 0.91575522  | -4.64444531 |
| Li   | -4.06299760 | 1.44416347  | -2.41772777 | H    | -10.94294721 | 0.66900371  | -3.97648882 |
| O    | -3.94217587 | -0.49034573 | -2.27897576 | H    | -10.49718907 | 1.10652572  | -5.64712629 |
| C    | -3.34990428 | -1.08861353 | -1.28847501 | C    | -9.24358791  | 2.06140591  | -4.09027017 |
| C    | -3.66303965 | -2.23865245 | -0.63809628 | H    | -9.80385597  | 2.63614234  | -3.34905497 |
| H    | -3.04776425 | -2.49563012 | 0.21950086  | N    | -8.17300361  | 1.29392946  | -3.44456407 |
| C    | -4.82656940 | -3.18001599 | -0.92080690 | C    | -7.09896750  | 1.90410652  | -2.63934360 |
| C    | -4.82667510 | -3.65993709 | -2.38967182 | C    | -7.51468387  | 2.83812051  | -1.74578248 |
| H    | -3.90049113 | -4.20299602 | -2.61733301 | C    | -6.65382005  | 3.68980877  | -0.82196415 |
| H    | -5.67204508 | -4.33448415 | -2.57962894 | C    | -5.96547330  | 2.81882917  | 0.25478497  |
| H    | -4.90222659 | -2.82230370 | -3.08817415 | H    | -5.30436302  | 2.07191215  | -0.19305640 |
| C    | -6.17877686 | -2.50591279 | -0.59071797 | H    | -5.36150341  | 3.43618019  | 0.93353069  |
| H    | -6.34191999 | -1.61120637 | -1.19767904 | H    | -6.71440791  | 2.28606503  | 0.85229839  |
| H    | -7.01626480 | -3.19241979 | -0.77489891 | C    | -5.58890528  | 4.48585082  | -1.60947527 |
| H    | -6.20901801 | -2.20444004 | 0.46282946  | H    | -6.06789576  | 5.16156875  | -2.32957265 |

|   |              |             |             |   |             |             |             |
|---|--------------|-------------|-------------|---|-------------|-------------|-------------|
| H | -4.97423443  | 5.09210190  | -0.93095251 | C | -4.85950681 | -2.79407556 | -6.49299415 |
| H | -4.92046337  | 3.82423866  | -2.16688522 | H | -4.96726883 | -3.14630751 | -7.52345963 |
| C | -7.57564691  | 4.70193968  | -0.10918359 | H | -5.30849002 | -3.54218341 | -5.83288755 |
| H | -8.08729954  | 5.34850211  | -0.83374391 | H | -2.71455943 | -2.54612501 | -6.96283966 |
| H | -8.34298667  | 4.18717670  | 0.48249448  | H | -3.02548631 | -3.29320971 | -5.39420745 |
| H | -7.00239531  | 5.34423162  | 0.57037823  | H | -2.99292443 | -0.37051076 | -6.11627827 |
| H | -8.58826414  | 2.95920690  | -1.63250493 | H | -2.90579683 | -1.06818631 | -4.47543740 |
| O | -5.90287529  | 1.48483135  | -2.92800990 | H | -6.57574196 | -1.48993422 | -5.95829669 |
| C | -8.68949333  | 3.02794142  | -5.16214475 | H | -5.45285187 | -0.79867899 | -7.16952327 |
| H | -7.91943885  | 3.63516917  | -4.67267635 |   |             |             |             |
| H | -8.19566915  | 2.43932446  | -5.94517126 |   |             |             |             |
| C | -9.75746580  | 3.91634318  | -5.76025457 |   |             |             |             |
| C | -10.26873661 | 3.67996737  | -7.04324603 |   |             |             |             |
| C | -11.27533298 | 4.48876900  | -7.57565569 |   |             |             |             |
| C | -11.78839875 | 5.54982537  | -6.82932870 |   |             |             |             |
| C | -11.28553772 | 5.79921408  | -5.55003897 |   |             |             |             |
| C | -10.27958107 | 4.99030086  | -5.02286100 |   |             |             |             |
| H | -9.88487621  | 5.19793117  | -4.03019522 |   |             |             |             |
| H | -11.67344251 | 6.62857528  | -4.96434378 |   |             |             |             |
| H | -12.57035289 | 6.18145452  | -7.24208947 |   |             |             |             |
| H | -11.65446447 | 4.29063070  | -8.57485121 |   |             |             |             |
| H | -9.86607756  | 2.86154048  | -7.63668104 |   |             |             |             |
| C | -0.29337137  | -1.77794752 | -1.87130776 |   |             |             |             |
| H | -1.09461075  | -2.39435280 | -2.29480546 |   |             |             |             |
| H | -0.07754777  | -0.97901724 | -2.59144109 |   |             |             |             |
| C | 0.94040110   | -2.61727625 | -1.62454360 |   |             |             |             |
| C | 0.82895393   | -3.87903939 | -1.02016878 |   |             |             |             |
| C | 1.96060747   | -4.65076331 | -0.75937949 |   |             |             |             |
| C | 3.22875362   | -4.17459125 | -1.10100793 |   |             |             |             |
| C | 3.35416459   | -2.92427152 | -1.70685524 |   |             |             |             |
| C | 2.21813796   | -2.15376843 | -1.96497146 |   |             |             |             |
| H | 2.32394141   | -1.18462064 | -2.44837670 |   |             |             |             |
| H | 4.33556057   | -2.54765788 | -1.98328957 |   |             |             |             |
| H | 4.11097712   | -4.77655125 | -0.90074193 |   |             |             |             |
| H | 1.85238546   | -5.62718948 | -0.29437457 |   |             |             |             |
| H | -0.15645695  | -4.26171712 | -0.76168720 |   |             |             |             |
| C | -3.91091044  | 2.87558153  | -5.11650334 |   |             |             |             |
| O | -3.17397868  | 2.38651061  | -3.98311014 |   |             |             |             |
| C | -1.94809238  | 3.13072075  | -3.94162162 |   |             |             |             |
| C | -2.35896794  | 4.56898132  | -4.28079358 |   |             |             |             |
| C | -3.58462004  | 4.38388118  | -5.21615081 |   |             |             |             |
| H | -4.42685805  | 4.99583331  | -4.88185652 |   |             |             |             |
| H | -3.35959360  | 4.66788936  | -6.24901184 |   |             |             |             |
| H | -2.64905459  | 5.09792164  | -3.36809375 |   |             |             |             |
| H | -1.54545985  | 5.13005987  | -4.75082498 |   |             |             |             |
| H | -1.52495250  | 3.00290073  | -2.94493826 |   |             |             |             |
| H | -1.25104056  | 2.72652998  | -4.69258396 |   |             |             |             |
| H | -3.57972085  | 2.33777196  | -6.01688856 |   |             |             |             |
| H | -4.95946634  | 2.64593933  | -4.92662408 |   |             |             |             |
| C | -5.53346938  | -1.43411927 | -6.27345637 |   |             |             |             |
| O | -4.79458212  | -0.83561344 | -5.19911647 |   |             |             |             |
| C | -3.40861824  | -1.13213489 | -5.44050349 |   |             |             |             |
| C | -3.38151224  | -2.53311924 | -6.09501100 |   |             |             |             |

**Table 12.** Geometric coordinates and thermally corrected MP2 energies for 7 dimer with no THF

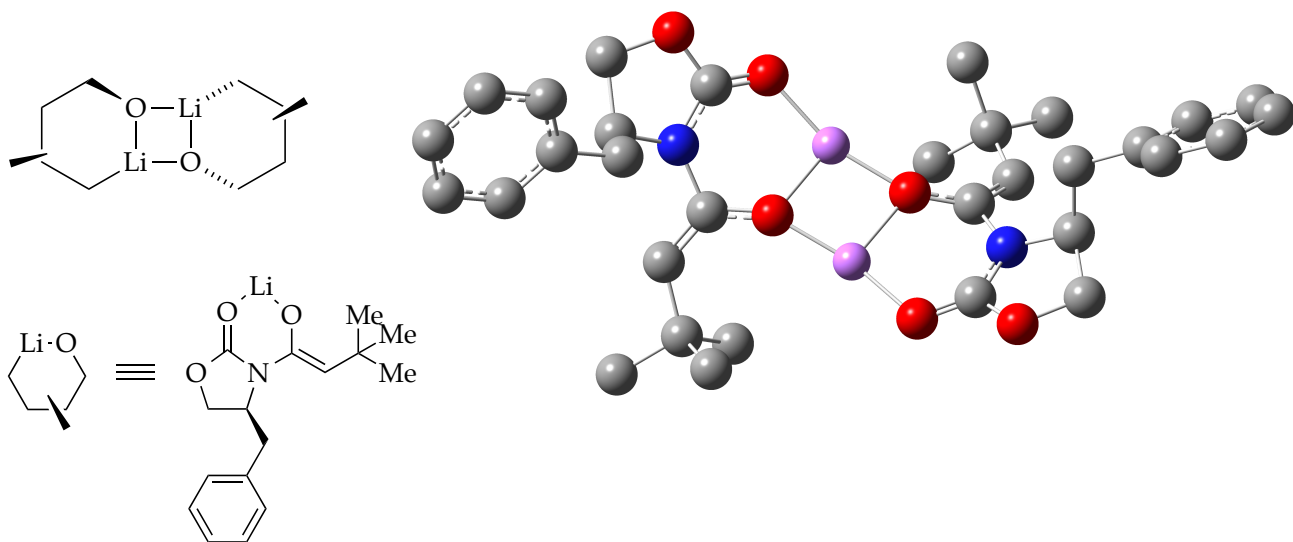

G = -1819.027824 Hartree

$G_{\text{MP2}} = -1137807.868$  kcal/mol

$\Delta G_{\text{MP2}} = 9.583721399$  kcal/mol Li vs. 7 dimer with two THF

| Atom | X           | Y           | Z           | Atom | X           | Y           | Z           |
|------|-------------|-------------|-------------|------|-------------|-------------|-------------|
| C    | 0.00000000  | 0.00000000  | 0.00000000  | H    | -4.88744133 | -4.10141279 | 0.91457656  |
| H    | 0.00000000  | 0.00000000  | 1.09511520  | H    | -5.65240959 | -5.06058254 | -0.36576223 |
| H    | 1.02901134  | 0.00000000  | -0.36250291 | Li   | -5.19715922 | -0.31027790 | -3.57962985 |
| C    | -0.85766544 | -1.13754322 | -0.58264398 | O    | -6.10528749 | -0.62681764 | -5.18075358 |
| H    | -0.99800161 | -1.92488821 | 0.16160902  | C    | -6.41648767 | 0.33840088  | -5.88150498 |
| N    | -2.11890100 | -0.41974403 | -0.81556747 | O    | -6.61682071 | 0.18036692  | -7.21268210 |
| C    | -1.91408489 | 0.92368953  | -0.81292138 | C    | -7.16044518 | 1.40366933  | -7.74953015 |
| O    | -0.64034538 | 1.21154616  | -0.44978959 | H    | -8.24103746 | 1.27315642  | -7.87021606 |
| O    | -2.70389367 | 1.83102888  | -1.08214940 | H    | -6.70579501 | 1.58301109  | -8.72493000 |
| Li   | -4.15667583 | 1.44851335  | -2.19184255 | C    | -6.81670013 | 2.47901564  | -6.70331949 |
| O    | -3.98137906 | -0.42649255 | -2.21655678 | H    | -7.66840879 | 3.14645800  | -6.55286579 |
| C    | -3.34811718 | -1.07172078 | -1.27405057 | N    | -6.61070676 | 1.63358495  | -5.51883404 |
| C    | -3.66646944 | -2.25372911 | -0.69479834 | C    | -6.36007196 | 2.16714241  | -4.17765590 |
| H    | -3.04006859 | -2.59425222 | 0.12432653  | C    | -7.11798627 | 3.21892337  | -3.78608268 |
| C    | -4.85048730 | -3.14368190 | -1.05590823 | C    | -6.99070040 | 3.98096297  | -2.47177666 |
| C    | -4.76354753 | -3.62252810 | -2.52348221 | C    | -7.24746803 | 3.05262112  | -1.26188137 |
| H    | -3.84689908 | -4.20065172 | -2.68949369 | H    | -6.54835596 | 2.21022659  | -1.24908317 |
| H    | -5.61894234 | -4.26073928 | -2.78029454 | H    | -7.14148951 | 3.60013678  | -0.31615344 |
| H    | -4.75175119 | -2.78262911 | -3.22587970 | H    | -8.26048989 | 2.63609346  | -1.30268874 |
| C    | -6.19139458 | -2.40874670 | -0.82476636 | C    | -5.59778700 | 4.63881627  | -2.33894559 |
| H    | -6.24994765 | -1.48881543 | -1.41540253 | H    | -5.42429634 | 5.34882931  | -3.15614529 |
| H    | -7.04210495 | -3.04643630 | -1.09871889 | H    | -5.50925303 | 5.18423542  | -1.39044955 |
| H    | -6.30146161 | -2.12811842 | 0.22903828  | H    | -4.79246517 | 3.89774485  | -2.37355590 |
| C    | -4.81679164 | -4.38657556 | -0.14240425 | C    | -8.05341930 | 5.09936162  | -2.45704434 |
| H    | -3.88515846 | -4.95063048 | -0.27741592 | H    | -7.90732288 | 5.79384574  | -3.29410675 |

|   |             |             |              |
|---|-------------|-------------|--------------|
| H | -9.06528261 | 4.68323886  | -2.53761653  |
| H | -8.00073198 | 5.67859783  | -1.52745296  |
| H | -7.91247277 | 3.53911124  | -4.45359693  |
| O | -5.40416718 | 1.56090549  | -3.52619947  |
| C | -5.56191774 | 3.31951451  | -7.03266365  |
| H | -5.29315201 | 3.86694843  | -6.12212987  |
| H | -4.73238520 | 2.63897537  | -7.26039809  |
| C | -5.78935685 | 4.28140591  | -8.17805391  |
| C | -5.26726282 | 4.03048580  | -9.45391068  |
| C | -5.50607954 | 4.90972495  | -10.51250295 |
| C | -6.27431450 | 6.05636349  | -10.31003184 |
| C | -6.79802137 | 6.32074556  | -9.04212564  |
| C | -6.55595816 | 5.44122919  | -7.98760141  |
| H | -6.95588988 | 5.66096142  | -6.99964657  |
| H | -7.38995838 | 7.21643675  | -8.87302275  |
| H | -6.45948119 | 6.74282588  | -11.13173226 |
| H | -5.08738855 | 4.69942508  | -11.49315821 |
| H | -4.65621009 | 3.14508985  | -9.61698549  |
| C | -0.30333822 | -1.75936927 | -1.88473296  |
| H | -1.10405616 | -2.37112959 | -2.31552934  |
| H | -0.09052181 | -0.95284004 | -2.59701119  |
| C | 0.93266965  | -2.59932457 | -1.64884080  |
| C | 0.82592409  | -3.86483562 | -1.05198861  |
| C | 1.95999096  | -4.63650988 | -0.80183557  |
| C | 3.22545286  | -4.15571537 | -1.14708086  |
| C | 3.34595731  | -2.90152746 | -1.74578847  |
| C | 2.20760672  | -2.13104240 | -1.99322638  |
| H | 2.30897755  | -1.15943617 | -2.47240240  |
| H | 4.32523901  | -2.52213666 | -2.02557304  |
| H | 4.10960710  | -4.75767284 | -0.95569804  |
| H | 1.85583679  | -5.61643718 | -0.34342369  |
| H | -0.15754653 | -4.25187881 | -0.79263478  |



**Table 13.** Geometric coordinates and thermally corrected MP2 energies for 7 spirocyclic dimer with no THF

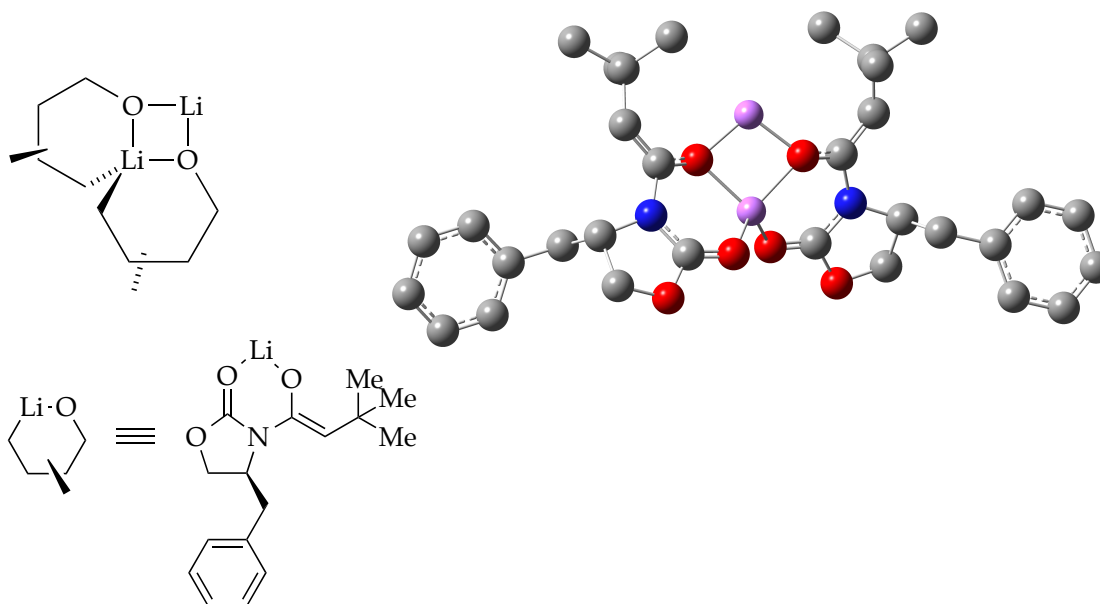

G = -1819.015172 Hartree

$G_{\text{MP2}} = -1137799.956$  kcal/mol

$\Delta G_{\text{MP2}} = 13.5397214$  kcal/mol Li vs. 7 dimer with two THF

| Atom | X          | Y           | Z           | Atom | X           | Y           | Z           |
|------|------------|-------------|-------------|------|-------------|-------------|-------------|
| Li   | 0.00000000 | 0.00000000  | 0.00000000  | H    | 3.43434397  | -1.19715468 | -1.85099942 |
| O    | 0.00000000 | 0.00000000  | 1.91159690  | H    | 5.10406105  | -0.90838965 | -1.36775299 |
| C    | 1.06485233 | 0.00000000  | 2.51790693  | H    | 4.73546315  | -2.22504798 | -2.49921889 |
| O    | 1.15247234 | 0.58063063  | 3.74385225  | O    | 1.70546531  | -0.95494870 | -0.05881879 |
| C    | 2.43455103 | 0.27440131  | 4.31938165  | Li   | 0.83118684  | -1.93313998 | -1.27266838 |
| H    | 2.30752528 | -0.55257587 | 5.02681272  | O    | -0.78559940 | -1.17599694 | -1.35116840 |
| H    | 2.79341846 | 1.15552245  | 4.85341520  | C    | -1.66285262 | -0.90647629 | -2.27859895 |
| C    | 3.31450270 | -0.11728123 | 3.12209970  | N    | -2.26859981 | 0.41444461  | -2.18395222 |
| H    | 3.94306148 | -0.97054810 | 3.38551733  | C    | -3.62932158 | 0.72515559  | -2.64534866 |
| N    | 2.28115586 | -0.51346727 | 2.15422188  | C    | -3.61248117 | 2.25837898  | -2.54008710 |
| C    | 2.56680515 | -1.18499742 | 0.89402773  | H    | -3.35140563 | 2.73490800  | -3.49149479 |
| C    | 3.68731228 | -1.95097084 | 0.82661939  | H    | -4.54832952 | 2.67935840  | -2.16950313 |
| H    | 4.26143805 | -2.09965529 | 1.73430594  | O    | -2.57379221 | 2.54716212  | -1.58784020 |
| C    | 4.22001844 | -2.66208972 | -0.41255571 | C    | -1.74250588 | 1.47560917  | -1.49738242 |
| C    | 5.61170397 | -3.23705773 | -0.07189462 | O    | -0.69830085 | 1.55753189  | -0.86118945 |
| H    | 6.30137641 | -2.43592745 | 0.22003541  | H    | -3.76100779 | 0.42497348  | -3.68707410 |
| H    | 5.55303994 | -3.95060932 | 0.75957807  | C    | -4.70104669 | 0.03440856  | -1.77015148 |
| H    | 6.04628817 | -3.75854628 | -0.93330863 | H    | -4.46007736 | -1.03407798 | -1.75019094 |
| C    | 3.31547437 | -3.85040831 | -0.82046117 | H    | -4.60724348 | 0.40908434  | -0.74360002 |
| H    | 2.30452101 | -3.52374888 | -1.10232793 | C    | -6.10588292 | 0.25144163  | -2.28771654 |
| H    | 3.72835537 | -4.38992066 | -1.68306667 | C    | -6.97504023 | 1.16228468  | -1.67240039 |
| H    | 3.19817558 | -4.55896270 | 0.00666701  | C    | -8.25938285 | 1.38117665  | -2.17545503 |
| C    | 4.37844269 | -1.69406340 | -1.60681394 | C    | -8.69540328 | 0.68990216  | -3.30598755 |

|   |             |             |             |
|---|-------------|-------------|-------------|
| C | -7.84134766 | -0.22482616 | -3.92676309 |
| C | -6.56012983 | -0.44104294 | -3.42062214 |
| H | -5.90514262 | -1.16428745 | -3.90266400 |
| H | -8.17590540 | -0.77484788 | -4.80251700 |
| H | -9.69506427 | 0.85711478  | -3.69778465 |
| H | -8.91920453 | 2.08857609  | -1.68001128 |
| H | -6.64739051 | 1.69552339  | -0.78245314 |
| C | -2.07690708 | -1.71882439 | -3.28616016 |
| C | -1.64293095 | -3.16219620 | -3.51624664 |
| C | -1.83983823 | -4.03075330 | -2.25316333 |
| H | -1.49878146 | -5.06001718 | -2.42636161 |
| H | -1.29758340 | -3.62392845 | -1.39373461 |
| H | -2.89951376 | -4.06736049 | -1.97628219 |
| C | -0.16885096 | -3.24384556 | -3.98225222 |
| H | 0.52650216  | -2.84487196 | -3.23029223 |
| H | 0.13204490  | -4.28115671 | -4.18011552 |
| H | -0.01138363 | -2.65851409 | -4.89471218 |
| C | -2.51754819 | -3.75088135 | -4.64396787 |
| H | -3.57798481 | -3.72614706 | -4.36553769 |
| H | -2.40022555 | -3.18131135 | -5.57438775 |
| H | -2.24764828 | -4.79357103 | -4.85103150 |
| H | -2.76297749 | -1.31296473 | -4.02132465 |
| C | 4.19914085  | 1.02785576  | 2.57624057  |
| H | 4.58391679  | 0.70164288  | 1.60385106  |
| H | 3.56368302  | 1.90396138  | 2.39823647  |
| C | 5.33884845  | 1.37973205  | 3.50668637  |
| C | 6.45933647  | 0.54067953  | 3.60608592  |
| C | 7.50110269  | 0.83725599  | 4.48426920  |
| C | 7.44198559  | 1.98337568  | 5.28076295  |
| C | 6.33695258  | 2.82978438  | 5.18824220  |
| C | 5.29534065  | 2.52847623  | 4.30803206  |
| H | 4.44337357  | 3.20084217  | 4.23202378  |
| H | 6.28532638  | 3.72851845  | 5.79722134  |
| H | 8.25453079  | 2.21708888  | 5.96335499  |
| H | 8.36249809  | 0.17697580  | 4.54279895  |
| H | 6.51859828  | -0.34758522 | 2.98002933  |

**Table 14.** Geometric coordinates and thermally corrected MP2 energies for 7 dimer with one DMEA

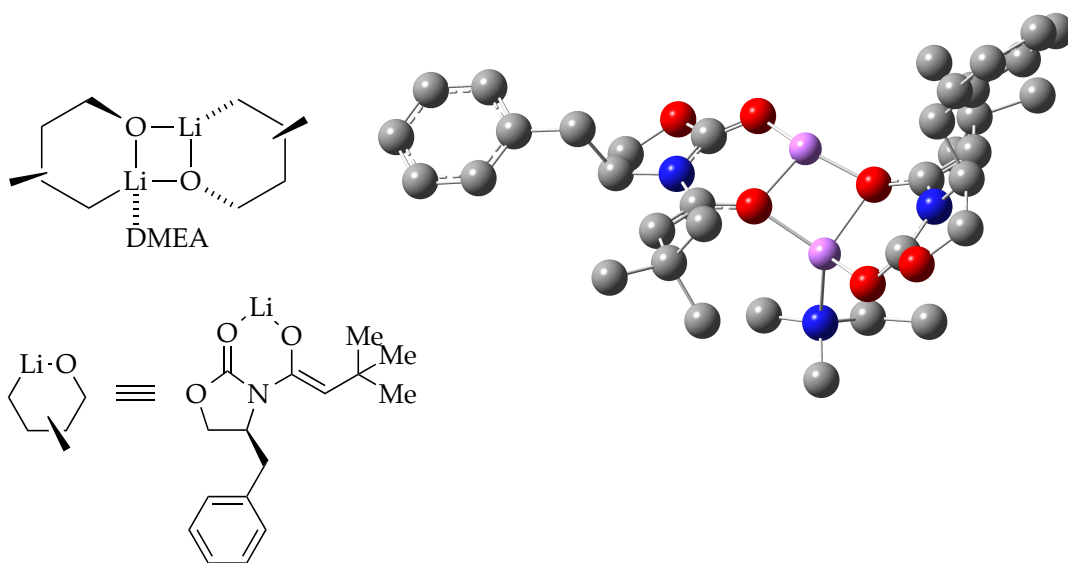

$G = -2032.681005$  Hartree

$G_{\text{MP2}} = -1271390.477$  kcal/mol

$\Delta G_{\text{MP2}} = 4.996905257$  kcal/mol Li vs. 7 dimer with two THF

| Atom | X           | Y           | Z           | Atom | X           | Y           | Z           |
|------|-------------|-------------|-------------|------|-------------|-------------|-------------|
| Li   | 0.00000000  | 0.00000000  | 0.00000000  | H    | -3.79333060 | 2.91653347  | 0.27473601  |
| O    | 0.00000000  | 0.00000000  | 1.94657030  | C    | -5.69391841 | 3.27619941  | -0.68064383 |
| C    | 0.72237635  | 0.00000000  | 3.02896452  | C    | -5.70197203 | 4.64200704  | -0.36709466 |
| N    | 0.61242558  | -1.22854888 | 3.82785311  | C    | -6.82308151 | 5.43228989  | -0.63004953 |
| C    | 1.45165878  | -1.55792610 | 4.99155024  | C    | -7.95693604 | 4.86641039  | -1.21332667 |
| C    | 1.24007578  | -3.07420212 | 5.03878757  | C    | -7.96434530 | 3.50516242  | -1.52725157 |
| H    | 1.95491966  | -3.61698353 | 4.40994568  | C    | -6.84338500 | 2.71934887  | -1.26198690 |
| H    | 1.24766052  | -3.48839272 | 6.04753050  | H    | -6.86155101 | 1.65716422  | -1.49820197 |
| O    | -0.08145915 | -3.24779578 | 4.48618391  | H    | -8.84666579 | 3.05384585  | -1.97354826 |
| C    | -0.35902813 | -2.17780832 | 3.69508275  | H    | -8.83105811 | 5.47901907  | -1.41681442 |
| O    | -1.38680973 | -2.17304776 | 3.01706958  | H    | -6.81027145 | 6.48853155  | -0.37416153 |
| Li   | -1.61447307 | -0.86624440 | 1.70436378  | H    | -4.82646516 | 5.08822971  | 0.10003835  |
| O    | -1.87971823 | -0.53100090 | -0.05712323 | C    | -3.73041250 | -0.90820880 | -1.53213531 |
| C    | -2.72392800 | -0.18176577 | -0.98748816 | C    | -4.16369385 | -2.30829830 | -1.11058341 |
| N    | -2.56418821 | 1.19230385  | -1.47565137 | C    | -3.00760914 | -3.32492652 | -1.24238445 |
| C    | -3.69152787 | 2.10064076  | -1.72571335 | H    | -2.15590239 | -3.02289935 | -0.62661722 |
| C    | -2.94505781 | 3.30148972  | -2.33182631 | H    | -3.32811444 | -4.32592335 | -0.92440625 |
| H    | -2.93667871 | 3.27187617  | -3.42697216 | H    | -2.66826855 | -3.39174199 | -2.28278084 |
| H    | -3.32948355 | 4.26687573  | -1.99923569 | C    | -4.68034415 | -2.31185976 | 0.34735565  |
| O    | -1.58932229 | 3.16460132  | -1.86481723 | H    | -5.52234761 | -1.61941782 | 0.46628884  |
| C    | -1.38725896 | 1.87734122  | -1.47697084 | H    | -5.02019781 | -3.31347927 | 0.64193106  |
| O    | -0.25826766 | 1.48264668  | -1.19660162 | H    | -3.89441065 | -2.01253013 | 1.04877722  |
| H    | -4.37557747 | 1.67056500  | -2.46092304 | C    | -5.31680988 | -2.75333014 | -2.03366611 |
| C    | -4.47218972 | 2.42030401  | -0.42955810 | H    | -6.17170586 | -2.06903949 | -1.95797021 |
| H    | -4.76279968 | 1.46188986  | 0.01554272  | H    | -4.99565030 | -2.77413641 | -3.08250636 |

|   |             |             |             |
|---|-------------|-------------|-------------|
| H | -5.66740177 | -3.75801178 | -1.76849508 |
| H | -4.29061407 | -0.45737416 | -2.34608363 |
| H | 2.49225799  | -1.30281923 | 4.77914204  |
| C | 0.96935268  | -0.85242533 | 6.28596642  |
| H | 0.88650379  | 0.21877984  | 6.08042582  |
| H | -0.04175001 | -1.21212703 | 6.51333426  |
| C | 1.88684333  | -1.10060855 | 7.46386807  |
| C | 3.13528317  | -0.46434523 | 7.54208676  |
| C | 3.99719921  | -0.70656875 | 8.61122067  |
| C | 3.62497584  | -1.59114852 | 9.62629723  |
| C | 2.38498445  | -2.22709776 | 9.56441084  |
| C | 1.52538262  | -1.98263740 | 8.49116333  |
| H | 0.55473270  | -2.47310568 | 8.45676073  |
| H | 2.08214740  | -2.91108608 | 10.35286986 |
| H | 4.29478457  | -1.77801336 | 10.46124904 |
| H | 4.95773168  | -0.19990901 | 8.65512406  |
| H | 3.43007163  | 0.23651448  | 6.76357472  |
| C | 1.55544427  | 0.97298900  | 3.48207150  |
| H | 2.10010394  | 0.79800994  | 4.40168269  |
| C | 1.76409160  | 2.34768794  | 2.85381730  |
| C | 0.41964378  | 3.09332103  | 2.69112773  |
| H | -0.06205347 | 3.23779268  | 3.66578923  |
| H | 0.57290992  | 4.08141250  | 2.23701385  |
| H | -0.26355652 | 2.52345659  | 2.05553301  |
| C | 2.46149528  | 2.25608041  | 1.47792831  |
| H | 1.83538766  | 1.72854510  | 0.75361451  |
| H | 2.65936642  | 3.25734203  | 1.07247629  |
| H | 3.42001488  | 1.72878620  | 1.56090108  |
| C | 2.66807407  | 3.16777998  | 3.79811261  |
| H | 2.21127672  | 3.27220015  | 4.79037177  |
| H | 3.64676100  | 2.68717203  | 3.92648903  |
| H | 2.83911145  | 4.17484107  | 3.39923860  |
| N | 1.61656175  | -1.23428135 | -0.80498958 |
| C | 1.10177759  | -2.33317082 | -1.65279623 |
| C | 0.29654428  | -1.87808240 | -2.86752160 |
| H | 0.90880838  | -1.33337707 | -3.59319750 |
| H | -0.54316250 | -1.24343063 | -2.57114403 |
| H | -0.11117086 | -2.75802960 | -3.37699823 |
| H | 0.46316476  | -2.95456541 | -1.01465363 |
| H | 1.94382342  | -2.97091204 | -1.98351306 |
| C | 2.54108713  | -0.36706074 | -1.55289549 |
| H | 2.96336011  | 0.37884264  | -0.87457381 |
| H | 3.37128600  | -0.94214131 | -2.00128566 |
| H | 2.00749125  | 0.16499979  | -2.34221905 |
| C | 2.31385443  | -1.80918167 | 0.35511646  |
| H | 2.66418929  | -1.00773214 | 1.01084347  |
| H | 1.62189650  | -2.43725060 | 0.92407930  |
| H | 3.17927205  | -2.42588254 | 0.05230676  |

**Table 15.** Geometric coordinates and thermally corrected MP2 energies for 7 dimer with two DMEA

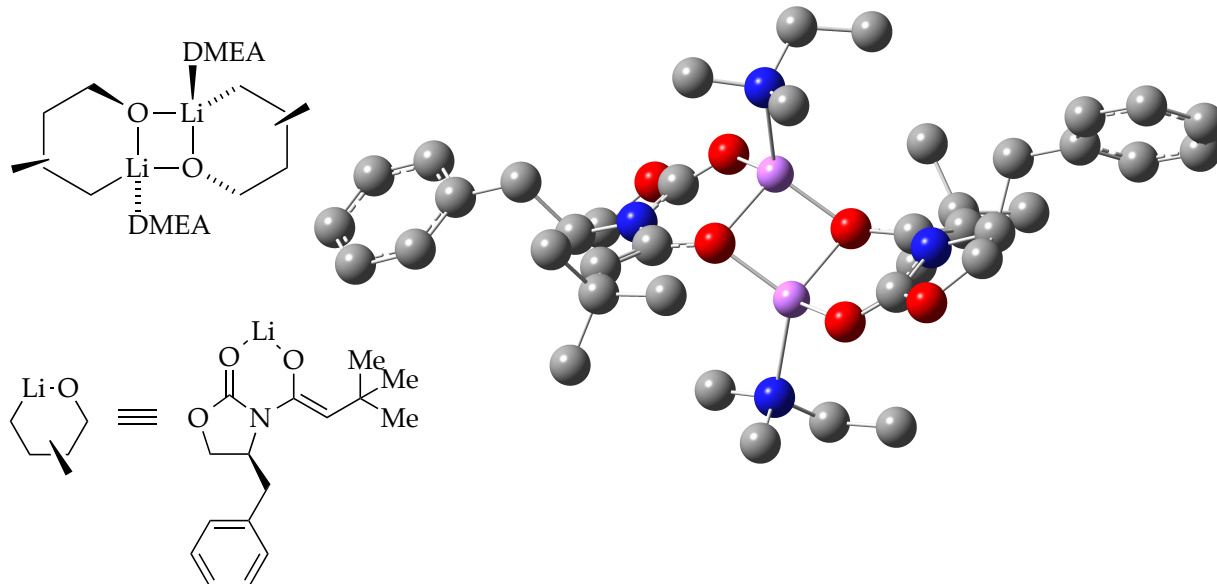

G = -2246.337074 Hartree

G<sub>MP2</sub> = -1404975.289 kcal/mol

ΔG<sub>MP2</sub> = -0.691410886 kcal/mol Li vs. 7 dimer with two THF

| Atom | X          | Y           | Z           | Atom | X           | Y           | Z           |
|------|------------|-------------|-------------|------|-------------|-------------|-------------|
| Li   | 0.00000000 | 0.00000000  | 0.00000000  | H    | 5.41120346  | 3.29284334  | -1.70716893 |
| O    | 0.00000000 | 0.00000000  | 1.93453380  | O    | 1.90946313  | -0.04362314 | -0.10544682 |
| C    | 1.05513034 | 0.00000000  | 2.55895082  | Li   | 1.64865901  | -1.68747188 | -1.05822450 |
| O    | 1.06267267 | -0.31781088 | 3.88591564  | O    | 1.57208007  | -1.84263060 | -3.00785304 |
| C    | 2.43306485 | -0.39801127 | 4.32587095  | C    | 0.51172859  | -1.87135862 | -3.62319287 |
| H    | 2.75735777 | -1.44399275 | 4.27590748  | O    | 0.50257831  | -1.77918145 | -4.97912996 |
| H    | 2.48416126 | -0.04634816 | 5.35712369  | C    | -0.85813539 | -1.73767149 | -5.44092440 |
| C    | 3.18229846 | 0.49198896  | 3.32892262  | H    | -0.94560754 | -2.38055227 | -6.31796821 |
| H    | 4.18258964 | 0.10885406  | 3.11389787  | H    | -1.09315356 | -0.70613532 | -5.72749696 |
| N    | 2.32087663 | 0.31902137  | 2.15028252  | C    | -1.71005690 | -2.20462777 | -4.24437470 |
| C    | 2.73469123 | 0.48350813  | 0.74552756  | H    | -1.94880799 | -3.27294201 | -4.34275551 |
| C    | 3.91505849 | 1.12481767  | 0.52780327  | N    | -0.75895921 | -2.01091145 | -3.14255549 |
| H    | 4.44993888 | 1.49264544  | 1.39752583  | C    | -1.02635338 | -2.30781846 | -1.72391041 |
| C    | 4.62829065 | 1.46244074  | -0.77423724 | C    | -1.98950266 | -3.22475850 | -1.44841366 |
| C    | 3.88344087 | 1.03640812  | -2.05189270 | C    | -2.45160601 | -3.65489834 | -0.05860165 |
| H    | 2.89177045 | 1.49345174  | -2.11077576 | C    | -1.28683490 | -4.25906096 | 0.75802989  |
| H    | 4.45738031 | 1.35037080  | -2.93357274 | H    | -0.48829619 | -3.52161382 | 0.87892030  |
| H    | 3.74397486 | -0.04573536 | -2.11071388 | H    | -1.62621218 | -4.56835447 | 1.75581947  |
| C    | 6.02463588 | 0.79309527  | -0.76677423 | H    | -0.87309697 | -5.14019572 | 0.25273280  |
| H    | 5.93564445 | -0.29937923 | -0.75317683 | C    | -3.04698369 | -2.46815917 | 0.73181178  |
| H    | 6.60563302 | 1.07573165  | -1.65480677 | H    | -3.89820838 | -2.03096322 | 0.19604240  |
| H    | 6.60177973 | 1.09021339  | 0.11834018  | H    | -3.40200355 | -2.79581259 | 1.71823061  |
| C    | 4.83326116 | 2.99726370  | -0.82134670 | H    | -2.29675835 | -1.68783335 | 0.88936933  |
| H    | 3.86942394 | 3.51846718  | -0.85366756 | C    | -3.54496062 | -4.72944933 | -0.22838845 |
| H    | 5.37499507 | 3.35363173  | 0.06415969  | H    | -4.40397330 | -4.33531001 | -0.78674253 |

|   |             |             |             |   |             |            |             |
|---|-------------|-------------|-------------|---|-------------|------------|-------------|
| H | -3.16140306 | -5.60121451 | -0.77385710 | H | -3.31518964 | 1.35560786 | -1.97305101 |
| H | -3.90965377 | -5.07621052 | 0.74609731  | H | -2.50135490 | 3.19461940 | -0.50197829 |
| H | -2.46461397 | -3.72887439 | -2.28489496 | H | -2.26619055 | 2.05672402 | 0.83342001  |
| O | -0.28293031 | -1.63593086 | -0.89765108 | C | 0.05397804  | 2.88350575 | 0.08244589  |
| C | -3.02010188 | -1.41204089 | -4.08661344 | H | -0.09174932 | 2.76768540 | 1.16032518  |
| H | -3.47044291 | -1.69227974 | -3.12919639 | H | 1.10387122  | 2.68262791 | -0.14649572 |
| H | -2.77397500 | -0.34486954 | -4.02705329 | H | -0.17846454 | 3.92765668 | -0.19394437 |
| C | -3.98413424 | -1.66716284 | -5.22651072 | C | -0.58389295 | 2.05241442 | -2.07766194 |
| C | -4.17687927 | -0.72010389 | -6.24108752 | H | -1.14248471 | 1.28224072 | -2.61426735 |
| C | -5.04621402 | -0.97279054 | -7.30431681 | H | -0.88925332 | 3.04439739 | -2.45827944 |
| C | -5.73867831 | -2.18205506 | -7.36982051 | H | 0.47856817  | 1.90832884 | -2.29338579 |
| C | -5.56001167 | -3.13361903 | -6.36298187 |   |             |            |             |
| C | -4.69232420 | -2.87638420 | -5.30206296 |   |             |            |             |
| H | -4.56968358 | -3.61826863 | -4.51567303 |   |             |            |             |
| H | -6.10211814 | -4.07489807 | -6.40045502 |   |             |            |             |
| H | -6.41719359 | -2.38009323 | -8.19513484 |   |             |            |             |
| H | -5.18404886 | -0.22229777 | -8.07832394 |   |             |            |             |
| H | -3.64921059 | 0.23011665  | -6.19280627 |   |             |            |             |
| N | 3.06345588  | -3.30056740 | -0.49135464 |   |             |            |             |
| C | 2.47999521  | -4.65874809 | -0.42186359 |   |             |            |             |
| C | 1.79096856  | -5.13154782 | -1.69969663 |   |             |            |             |
| H | 2.48561770  | -5.21864399 | -2.54082654 |   |             |            |             |
| H | 0.97971711  | -4.45659516 | -1.98514743 |   |             |            |             |
| H | 1.35887206  | -6.12355314 | -1.52566252 |   |             |            |             |
| H | 1.74771226  | -4.64881117 | 0.39256126  |   |             |            |             |
| H | 3.26782832  | -5.38279094 | -0.13747882 |   |             |            |             |
| C | 4.14635416  | -3.23475305 | -1.48544005 |   |             |            |             |
| H | 4.60414766  | -2.24207505 | -1.45398932 |   |             |            |             |
| H | 4.93183980  | -3.98671564 | -1.28746959 |   |             |            |             |
| H | 3.74877815  | -3.38580717 | -2.49014134 |   |             |            |             |
| C | 3.59428140  | -2.94451099 | 0.83267273  |   |             |            |             |
| H | 4.02297553  | -1.93914970 | 0.80078268  |   |             |            |             |
| H | 2.78212055  | -2.95277898 | 1.56656369  |   |             |            |             |
| H | 4.37419129  | -3.65224847 | 1.16836335  |   |             |            |             |
| C | 3.25751561  | 1.96828219  | 3.80175837  |   |             |            |             |
| H | 3.54472512  | 2.58985060  | 2.94843006  |   |             |            |             |
| H | 2.24889803  | 2.28244442  | 4.09745437  |   |             |            |             |
| C | 4.22258164  | 2.16865261  | 4.95049160  |   |             |            |             |
| C | 5.60824978  | 2.13214698  | 4.73126547  |   |             |            |             |
| C | 6.50557618  | 2.29147043  | 5.78669761  |   |             |            |             |
| C | 6.03255948  | 2.49239025  | 7.08567416  |   |             |            |             |
| C | 4.65779925  | 2.53522289  | 7.31822556  |   |             |            |             |
| C | 3.76271873  | 2.37387247  | 6.25827763  |   |             |            |             |
| H | 2.69210103  | 2.42032056  | 6.44657970  |   |             |            |             |
| H | 4.27891519  | 2.69823312  | 8.32377995  |   |             |            |             |
| H | 6.73109264  | 2.61949470  | 7.90825413  |   |             |            |             |
| H | 7.57497553  | 2.26422057  | 5.59441963  |   |             |            |             |
| H | 5.98757616  | 1.98740240  | 3.72163468  |   |             |            |             |
| N | -0.80104906 | 1.92316863  | -0.63128111 |   |             |            |             |
| C | -2.21168038 | 2.15483221  | -0.25682667 |   |             |            |             |
| C | -3.20145486 | 1.18415425  | -0.89762257 |   |             |            |             |
| H | -4.18851120 | 1.31735750  | -0.44123485 |   |             |            |             |
| H | -2.89521297 | 0.14481352  | -0.74402940 |   |             |            |             |

**Table 16.** Geometric coordinates and thermally corrected MP2 energies for 7 spirocyclic dimer with one DMEA

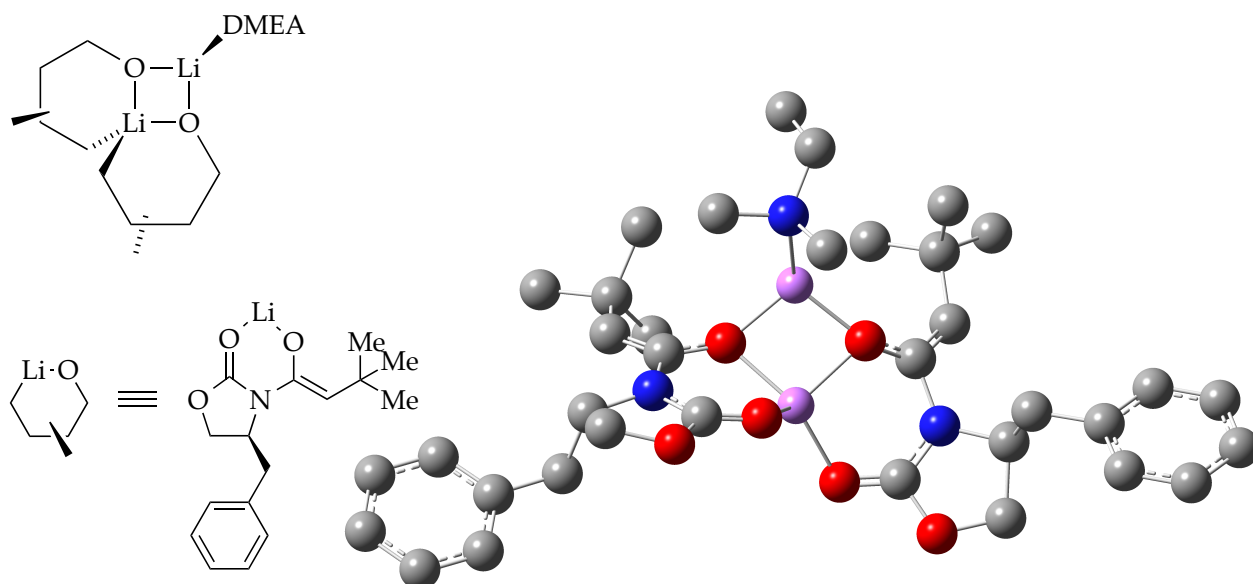

$G = -2032.678376$  Hartree

$G_{\text{MP2}} = -1271389.192$  kcal/mol

$\Delta G_{\text{MP2}} = 5.639405257$  kcal/mol Li vs. 7 dimer with two THF

| Atom | X          | Y           | Z           | Atom | X           | Y           | Z           |
|------|------------|-------------|-------------|------|-------------|-------------|-------------|
| Li   | 0.00000000 | 0.00000000  | 0.00000000  | H    | 2.84667535  | -0.70213760 | -2.09681042 |
| O    | 0.00000000 | 0.00000000  | 1.95671960  | H    | 4.32185991  | 0.26513194  | -1.94647049 |
| C    | 1.08036405 | 0.00000000  | 2.53801937  | H    | 4.29547935  | -1.13822251 | -3.03358753 |
| O    | 1.15468488 | 0.40244680  | 3.83697226  | O    | 1.57028495  | -1.12380627 | 0.02371978  |
| C    | 2.48559379 | 0.15087292  | 4.32529136  | Li   | 0.27668343  | -2.39214028 | -0.34687779 |
| H    | 2.48233007 | -0.79782222 | 4.87460055  | O    | -1.06041848 | -1.29847934 | -1.00041083 |
| H    | 2.76437694 | 0.96182943  | 4.99941827  | C    | -1.79657847 | -0.87778643 | -1.99181705 |
| C    | 3.34297245 | 0.08397080  | 3.05548993  | N    | -2.47527889 | 0.40136260  | -1.75734604 |
| H    | 4.11727715 | -0.68080322 | 3.15062182  | C    | -3.91534209 | 0.60609373  | -1.93781834 |
| N    | 2.32594154 | -0.34644886 | 2.08454954  | C    | -4.00328576 | 2.12946062  | -1.72308722 |
| C    | 2.62119226 | -0.90069934 | 0.76134223  | H    | -3.99868743 | 2.67984999  | -2.67010858 |
| C    | 3.91996962 | -1.13021823 | 0.43716724  | H    | -4.86691354 | 2.43695476  | -1.13116853 |
| H    | 4.68823138 | -0.91468813 | 1.17024263  | O    | -2.80762113 | 2.47276249  | -0.99521374 |
| C    | 4.41527753 | -1.65585539 | -0.90680495 | C    | -1.90504566 | 1.46686251  | -1.13586005 |
| C    | 5.95765329 | -1.65277974 | -0.88377832 | O    | -0.75260534 | 1.58814104  | -0.72844884 |
| H    | 6.34577432 | -0.63914289 | -0.72315981 | H    | -4.21378826 | 0.34681152  | -2.95667966 |
| H    | 6.34385058 | -2.29296787 | -0.07994269 | C    | -4.74393972 | -0.23590834 | -0.94000686 |
| H    | 6.36515032 | -2.02159684 | -1.83284005 | H    | -4.42886078 | -1.27901710 | -1.06133546 |
| C    | 3.93766534 | -3.10508151 | -1.15657191 | H    | -4.47886563 | 0.06669005  | 0.08027787  |
| H    | 4.29680908 | -3.77735198 | -0.36741754 | C    | -6.23483525 | -0.10814067 | -1.16290455 |
| H    | 2.84430016 | -3.15408748 | -1.17512397 | C    | -7.03343612 | 0.66551496  | -0.31006877 |
| H    | 4.30872009 | -3.48369673 | -2.11862933 | C    | -8.40390427 | 0.80500398  | -0.54013617 |
| C    | 3.93817856 | -0.75472702 | -2.06830126 | C    | -8.99844741 | 0.17077829  | -1.63117958 |

|   |              |             |             |
|---|--------------|-------------|-------------|
| C | -8.21511888  | -0.60688973 | -2.48749976 |
| C | -6.84734831  | -0.74450613 | -2.25344706 |
| H | -6.24555262  | -1.36063729 | -2.91874769 |
| H | -8.67127665  | -1.11109405 | -3.33551735 |
| H | -10.06489162 | 0.27645928  | -1.81105866 |
| H | -9.00587705  | 1.40609494  | 0.13635530  |
| H | -6.57914545  | 1.15328495  | 0.54979636  |
| C | -2.05402585  | -1.45684500 | -3.19144837 |
| C | -1.57511165  | -2.81904554 | -3.67309290 |
| C | -2.06517212  | -3.93619523 | -2.72538536 |
| H | -1.69822280  | -4.92107199 | -3.04525930 |
| H | -1.72331064  | -3.75417615 | -1.70187521 |
| H | -3.16089900  | -3.97305682 | -2.70534413 |
| C | -0.03362845  | -2.86405139 | -3.78327388 |
| H | 0.44612015   | -2.64464113 | -2.82334666 |
| H | 0.31246639   | -3.84980546 | -4.12326867 |
| H | 0.32503624   | -2.11314860 | -4.49603491 |
| C | -2.16494240  | -3.07708303 | -5.07473749 |
| H | -3.26177270  | -3.06707638 | -5.04780276 |
| H | -1.83938174  | -2.30820636 | -5.78606317 |
| H | -1.84596216  | -4.05204404 | -5.46325432 |
| H | -2.64867066  | -0.88161221 | -3.89536267 |
| N | -0.00976746  | -4.01578820 | 0.99506133  |
| C | -0.30968063  | -5.35711661 | 0.44443519  |
| H | -1.28443422  | -5.29073784 | -0.04940268 |
| H | -0.41915639  | -6.08211858 | 1.27167503  |
| C | 0.72285064   | -5.86680010 | -0.55873743 |
| H | 1.70649052   | -6.02587116 | -0.10656194 |
| H | 0.39072271   | -6.82726973 | -0.96777346 |
| H | 0.83982900   | -5.17032287 | -1.39650200 |
| C | 1.18194563   | -4.05555855 | 1.86138544  |
| H | 2.06661949   | -4.33029992 | 1.28392461  |
| H | 1.35461507   | -3.06294343 | 2.28327750  |
| H | 1.05627724   | -4.77629462 | 2.68831259  |
| C | -1.16403783  | -3.53387989 | 1.77991283  |
| H | -0.95967119  | -2.52655412 | 2.15423775  |
| H | -2.04869393  | -3.48644191 | 1.13889104  |
| H | -1.38034092  | -4.19550590 | 2.63620307  |
| C | 3.97728879   | 1.44304451  | 2.66788625  |
| H | 4.34587497   | 1.35652364  | 1.64085335  |
| H | 3.18556219   | 2.20238799  | 2.66170374  |
| C | 5.09281968   | 1.85778227  | 3.60221521  |
| C | 6.34458757   | 1.22584414  | 3.54346559  |
| C | 7.37058627   | 1.58503684  | 4.41689805  |
| C | 7.16420493   | 2.58760583  | 5.36752981  |
| C | 5.92674846   | 3.22813208  | 5.43437888  |
| C | 4.90143552   | 2.86408833  | 4.55873950  |
| H | 3.94375862   | 3.37807077  | 4.60830230  |
| H | 5.75812575   | 4.01544534  | 6.16442172  |
| H | 7.96445853   | 2.87066127  | 6.04595242  |
| H | 8.33438594   | 1.08691258  | 4.35097068  |
| H | 6.52101006   | 0.45419375  | 2.79668635  |



**Table 17.** Geometric coordinates and thermally corrected MP2 energies for 7 spirocyclic dimer with two DMEA isomer 1

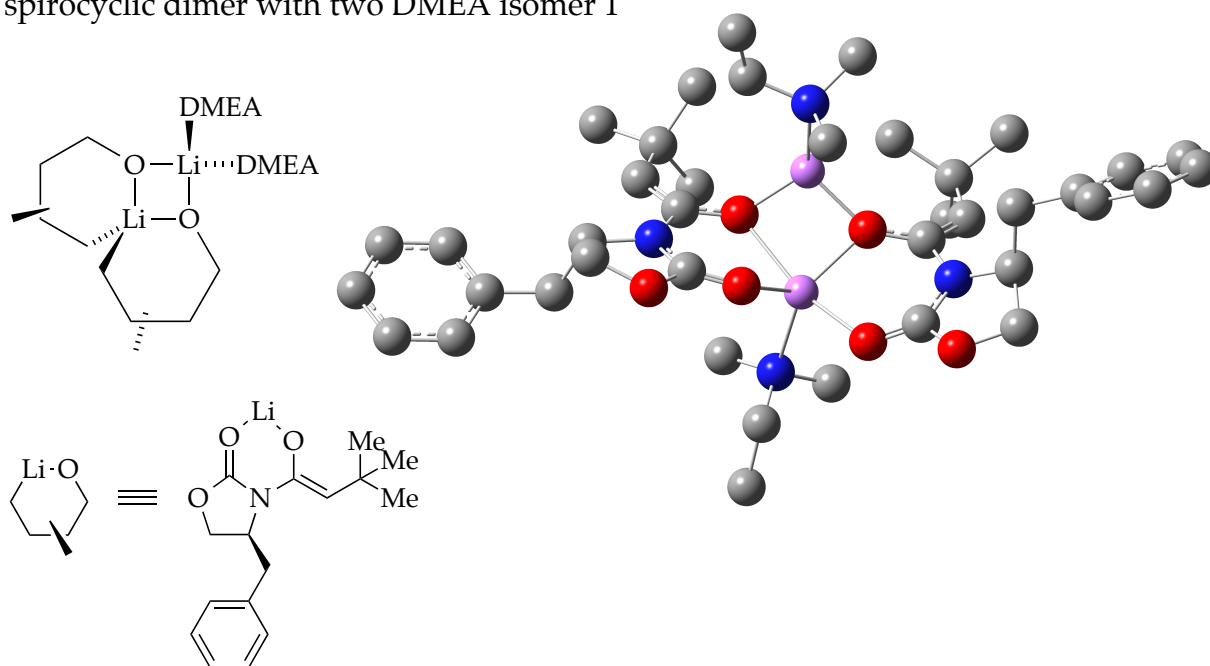

$G = -2246.325941$  Hartree

$G_{\text{MP2}} = -1404966.831$  kcal/mol

$\Delta G_{\text{MP2}} = 3.537589114$  kcal/mol Li vs. 7 dimer with two THF

| Atom | X          | Y          | Z           | Atom | X           | Y           | Z           |
|------|------------|------------|-------------|------|-------------|-------------|-------------|
| Li   | 0.00000000 | 0.00000000 | 0.00000000  | H    | 7.90140022  | 4.99677255  | -2.38320371 |
| Li   | 0.00000000 | 0.00000000 | 2.62675760  | H    | 9.60107942  | 4.76416667  | -0.58109499 |
| O    | 1.53835750 | 0.00000000 | 1.66662966  | H    | 9.15735218  | 3.24372480  | 1.33855253  |
| C    | 2.68534935 | 0.59860524 | 1.70774919  | H    | 7.03818022  | 1.97709659  | 1.45597111  |
| N    | 2.75255641 | 1.83734729 | 0.92184947  | C    | 3.80628670  | 0.22271062  | 2.38513012  |
| C    | 1.72731167 | 2.35148855 | 0.17339717  | H    | 4.68489799  | 0.85455062  | 2.33466071  |
| O    | 0.62287435 | 1.89344246 | -0.08550586 | C    | 3.94543071  | -1.01926334 | 3.25960934  |
| O    | 2.09257207 | 3.56778542 | -0.33440993 | C    | 5.41911767  | -1.12978571 | 3.70309585  |
| C    | 3.33560475 | 3.96712345 | 0.26713908  | H    | 5.57400183  | -2.00920071 | 4.34021913  |
| H    | 3.12014528 | 4.64712933 | 1.10002583  | H    | 6.08361068  | -1.22177496 | 2.83483748  |
| H    | 3.93166488 | 4.49036187 | -0.48219926 | H    | 5.72964609  | -0.24390831 | 4.27233062  |
| C    | 3.96251205 | 2.65092886 | 0.74298239  | C    | 3.56946460  | -2.30694372 | 2.49374187  |
| H    | 4.46804790 | 2.78759092 | 1.70185330  | H    | 4.22043076  | -2.43923524 | 1.62132584  |
| C    | 4.93801844 | 2.02344409 | -0.28436681 | H    | 3.67926167  | -3.19161469 | 3.13550866  |
| H    | 5.11135911 | 0.98619970 | 0.01989675  | H    | 2.53573959  | -2.25783939 | 2.14171179  |
| H    | 4.43773325 | 1.99731864 | -1.26050198 | C    | 3.06728426  | -0.91519925 | 4.52983302  |
| C    | 6.24727628 | 2.77454165 | -0.38616893 | H    | 3.33558033  | -0.02894262 | 5.11766321  |
| C    | 7.21867766 | 2.64859848 | 0.61891644  | H    | 2.00738807  | -0.83986371 | 4.26351741  |
| C    | 8.41631278 | 3.35963874 | 0.55189596  | H    | 3.18934804  | -1.79850451 | 5.17179847  |
| C    | 8.66685307 | 4.21186893 | -0.52625296 | O    | -1.16337166 | -0.74877407 | 1.45400127  |
| C    | 7.71295349 | 4.34287266 | -1.53570687 | C    | -2.28932252 | -1.38259962 | 1.31924370  |
| C    | 6.51439114 | 3.62961272 | -1.46397913 | N    | -3.23645161 | -0.73616545 | 0.40309331  |
| H    | 5.78145444 | 3.72808105 | -2.26208582 | C    | -4.67974427 | -0.63077999 | 0.63135701  |

|   |              |             |             |   |             |             |             |
|---|--------------|-------------|-------------|---|-------------|-------------|-------------|
| C | -5.12806405  | -0.02068446 | -0.70989850 | C | 0.90830800  | -0.34554229 | -2.82822451 |
| H | -5.48547860  | -0.78518298 | -1.40903269 | C | 1.43465142  | -0.95514837 | -4.13698693 |
| H | -5.89229682  | 0.75110061  | -0.60181887 | H | 2.49712116  | -1.21622768 | -4.07811935 |
| O | -3.94372218  | 0.58168709  | -1.25911989 | H | 1.31921205  | -0.22565288 | -4.94698061 |
| C | -2.84856820  | 0.03151006  | -0.65616341 | H | 0.88060089  | -1.85502485 | -4.42601933 |
| O | -1.72400077  | 0.24399477  | -1.08460548 | H | 1.45789475  | 0.57859032  | -2.61191927 |
| H | -5.12466010  | -1.62042682 | 0.76271769  | H | -0.14127330 | -0.06059618 | -2.94635558 |
| C | -5.00872626  | 0.23710395  | 1.86871235  | C | 0.17787072  | -2.40252030 | -1.71277619 |
| H | -4.43977956  | -0.17799388 | 2.70889953  | H | 0.56608896  | -3.12323897 | -2.45255330 |
| H | -4.63869581  | 1.25404507  | 1.68882285  | H | 0.15346755  | -2.89979726 | -0.73729472 |
| C | -6.48513782  | 0.26192484  | 2.19616909  | H | -0.84619137 | -2.13341181 | -1.98533398 |
| C | -7.28012018  | 1.37493171  | 1.89130793  | C | 2.36808648  | -1.50975321 | -1.24029173 |
| C | -8.64875088  | 1.37771470  | 2.16943068  | H | 2.86425567  | -2.18136282 | -1.96179955 |
| C | -9.24547302  | 0.26266449  | 2.75830630  | H | 2.95287820  | -0.58795411 | -1.16470832 |
| C | -8.46431482  | -0.85256935 | 3.07088240  | H | 2.37531438  | -1.98992428 | -0.25919776 |
| C | -7.09791612  | -0.85077933 | 2.79274088  |   |             |             |             |
| H | -6.49394751  | -1.71886189 | 3.04939657  |   |             |             |             |
| H | -8.91906572  | -1.72287177 | 3.53690881  |   |             |             |             |
| H | -10.30987838 | 0.26322024  | 2.97703189  |   |             |             |             |
| H | -9.24621210  | 2.25316563  | 1.92863585  |   |             |             |             |
| H | -6.82052903  | 2.25283134  | 1.44189772  |   |             |             |             |
| C | -2.71831249  | -2.53119471 | 1.90393143  |   |             |             |             |
| C | -2.00241917  | -3.44614159 | 2.88593395  |   |             |             |             |
| C | -0.84437089  | -2.77427484 | 3.64917132  |   |             |             |             |
| H | -0.03297439  | -2.48942123 | 2.97411660  |   |             |             |             |
| H | -1.19046415  | -1.88051272 | 4.18381972  |   |             |             |             |
| H | -0.43414790  | -3.46703563 | 4.39526424  |   |             |             |             |
| C | -1.44114151  | -4.67051389 | 2.12126359  |   |             |             |             |
| H | -0.97044198  | -5.38893837 | 2.80653325  |   |             |             |             |
| H | -2.23827380  | -5.19421182 | 1.57984832  |   |             |             |             |
| H | -0.69021258  | -4.35546252 | 1.38797425  |   |             |             |             |
| C | -3.03741373  | -3.94697984 | 3.92041775  |   |             |             |             |
| H | -3.87980205  | -4.44704547 | 3.42563341  |   |             |             |             |
| H | -2.58644387  | -4.66555945 | 4.61682732  |   |             |             |             |
| H | -3.44189822  | -3.11249114 | 4.50624149  |   |             |             |             |
| H | -3.67505665  | -2.92278691 | 1.56589431  |   |             |             |             |
| N | -0.62300060  | 1.56210040  | 3.92037637  |   |             |             |             |
| C | 0.58043712   | 2.27468463  | 4.41205939  |   |             |             |             |
| C | 0.35265818   | 3.55448365  | 5.22931574  |   |             |             |             |
| H | -0.16996247  | 4.32585643  | 4.65402269  |   |             |             |             |
| H | 1.32273748   | 3.96731541  | 5.52822319  |   |             |             |             |
| H | -0.21850879  | 3.36605390  | 6.14465014  |   |             |             |             |
| H | 1.19155262   | 2.50535790  | 3.53242687  |   |             |             |             |
| H | 1.15436727   | 1.55790064  | 5.01039288  |   |             |             |             |
| C | -1.46629700  | 1.05969929  | 5.01355078  |   |             |             |             |
| H | -1.94848973  | 1.86420268  | 5.59198566  |   |             |             |             |
| H | -2.25500399  | 0.42473764  | 4.59735003  |   |             |             |             |
| H | -0.86139493  | 0.45571012  | 5.69822900  |   |             |             |             |
| C | -1.41746291  | 2.38017898  | 2.98729248  |   |             |             |             |
| H | -1.89115875  | 3.24618538  | 3.47624788  |   |             |             |             |
| H | -0.77888482  | 2.73368122  | 2.17257536  |   |             |             |             |
| H | -2.20097549  | 1.75714635  | 2.54753990  |   |             |             |             |
| N | 0.98814530   | -1.18390513 | -1.61150162 |   |             |             |             |

**Table 18.** Geometric coordinates and thermally corrected MP2 energies for 7 spirocyclic dimer with two DMEA isomer 2

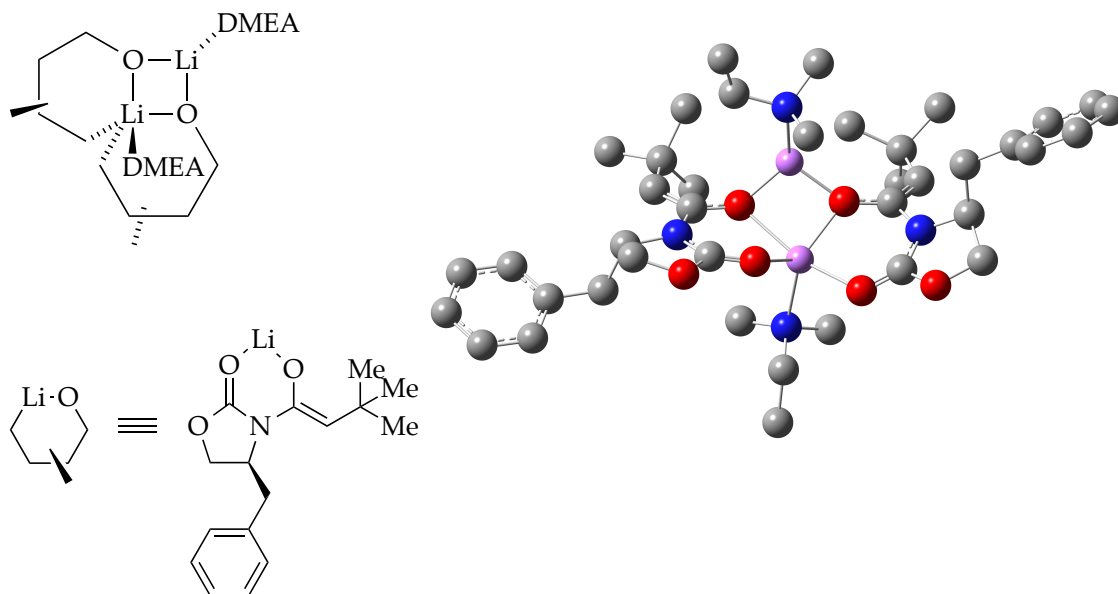

$G = -2246.325937$  Hartree

$G_{\text{MP2}} = -1404966.828$  kcal/mol

$\Delta G_{\text{MP2}} = 3.539089114$  kcal/mol Li vs. 7 dimer with two THF

| Atom | X          | Y          | Z           | Atom | X           | Y           | Z           |
|------|------------|------------|-------------|------|-------------|-------------|-------------|
| Li   | 0.0000000  | 0.0000000  | 0.0000000   | H    | 5.78160378  | 3.72811927  | -2.26186534 |
| Li   | 0.0000000  | 0.0000000  | 2.62682900  | H    | 7.90154311  | 4.99682740  | -2.38292840 |
| O    | 1.53841196 | 0.0000000  | 1.66683480  | H    | 9.60114788  | 4.76428563  | -0.58074214 |
| C    | 2.68536740 | 0.59867925 | 1.70799309  | H    | 9.15736068  | 3.24388359  | 1.33892111  |
| N    | 2.75260416 | 1.83734003 | 0.92197359  | H    | 7.03820396  | 1.97722037  | 1.45627355  |
| C    | 1.72739471 | 2.35145412 | 0.17344771  | C    | 3.80619701  | 0.22299916  | 2.38566883  |
| O    | 0.62294740 | 1.89344484 | -0.08548101 | H    | 4.68475287  | 0.85492299  | 2.33530563  |
| O    | 2.09267837 | 3.56774894 | -0.33435456 | C    | 3.94523488  | -1.01872919 | 3.26051834  |
| C    | 3.33565194 | 3.96711999 | 0.26728680  | C    | 5.41879917  | -1.12891173 | 3.70448944  |
| H    | 3.12011558 | 4.64711133 | 1.10016540  | H    | 5.57361051  | -2.00810038 | 4.34194118  |
| H    | 3.93175580 | 4.49037944 | -0.48200322 | H    | 6.08356574  | -1.22108449 | 2.83645997  |
| C    | 3.96256049 | 2.65094034 | 0.74315697  | H    | 5.72903586  | -0.24280848 | 4.27353558  |
| H    | 4.46804749 | 2.78761140 | 1.70205178  | C    | 3.56969708  | -2.30667068 | 2.49487780  |
| C    | 4.93812172 | 2.02349003 | -0.28416090 | H    | 4.22096549  | -2.43910523 | 1.62270896  |
| H    | 5.11147552 | 0.98624470 | 0.02008766  | H    | 3.67941384  | -3.19115305 | 3.13691788  |
| H    | 4.43786931 | 1.99736919 | -1.26031344 | H    | 2.53607749  | -2.25781191 | 2.14250417  |
| C    | 6.24736312 | 2.77462062 | -0.38591297 | C    | 3.06667547  | -0.91446007 | 4.53044535  |
| C    | 7.21872370 | 2.64871351 | 0.61921719  | H    | 3.33451108  | -0.02790813 | 5.11803269  |
| C    | 8.41635187 | 3.35976862 | 0.55223202  | H    | 2.00683967  | -0.83953691 | 4.26378522  |
| C    | 8.66692642 | 4.21197725 | -0.52592804 | H    | 3.18880602  | -1.79749565 | 5.17276816  |
| C    | 7.71306899 | 4.34294408 | -1.53542589 | O    | -1.16334888 | -0.74879157 | 1.45402830  |
| C    | 6.51451142 | 3.62967273 | -1.46372940 | C    | -2.28928577 | -1.38264083 | 1.31925016  |

|   |              |             |             |   |             |             |             |
|---|--------------|-------------|-------------|---|-------------|-------------|-------------|
| N | -3.23643067  | -0.73619688 | 0.40311725  | H | -2.20089462 | 1.75718470  | 2.54748137  |
| C | -4.67974046  | -0.63094291 | 0.63133715  | N | 0.98795038  | -1.18386878 | -1.61163248 |
| C | -5.12806394  | -0.02074212 | -0.70986947 | C | 0.90789196  | -0.34554889 | -2.82837310 |
| H | -5.48540987  | -0.78519709 | -1.40908509 | C | 1.43410169  | -0.95519113 | -4.13716774 |
| H | -5.89235033  | 0.75098260  | -0.60173708 | H | 2.49660771  | -1.21615263 | -4.07843646 |
| O | -3.94374484  | 0.58175544  | -1.25900358 | H | 1.31846502  | -0.22576668 | -4.94719888 |
| C | -2.84857165  | 0.03157895  | -0.65607956 | H | 0.88010233  | -1.85514815 | -4.42604855 |
| O | -1.72401357  | 0.24413010  | -1.08452100 | H | 1.45744694  | 0.57862656  | -2.61217370 |
| H | -5.12457917  | -1.62064082 | 0.76256832  | H | -0.14172356 | -0.06068094 | -2.94636821 |
| C | -5.00886784  | 0.23675846  | 1.86877987  | C | 0.17769717  | -2.40250692 | -1.71276089 |
| H | -4.43991159  | -0.17838533 | 2.70893813  | H | 0.56580966  | -3.12321640 | -2.45260422 |
| H | -4.63895407  | 1.25377074  | 1.68904605  | H | 0.15347543  | -2.89975433 | -0.73725950 |
| C | -6.48529696  | 0.26132638  | 2.19616863  | H | -0.84642125 | -2.13342811 | -1.98514349 |
| C | -7.28045527  | 1.37421510  | 1.89133686  | C | 2.36797232  | -1.50967389 | -1.24068679 |
| C | -8.64910908  | 1.37672091  | 2.16934596  | H | 2.86400371  | -2.18128910 | -1.96228231 |
| C | -9.24567661  | 0.26151008  | 2.75807594  | H | 2.95275887  | -0.58786050 | -1.16524635 |
| C | -8.46434141  | -0.85360885 | 3.07062005  | H | 2.37541952  | -1.98982091 | -0.25958525 |
| C | -7.09792001  | -0.85154150 | 2.79259144  |   |             |             |             |
| H | -6.49381352  | -1.71954134 | 3.04920236  |   |             |             |             |
| H | -8.91897177  | -1.72403750 | 3.53652552  |   |             |             |             |
| H | -10.31010077 | 0.26185127  | 2.97670653  |   |             |             |             |
| H | -9.24671491  | 2.25208005  | 1.92857358  |   |             |             |             |
| H | -6.82099081  | 2.25223459  | 1.44203271  |   |             |             |             |
| C | -2.71825985  | -2.53126443 | 1.90389842  |   |             |             |             |
| C | -2.00237445  | -3.44623475 | 2.88589231  |   |             |             |             |
| C | -0.84430392  | -2.77440827 | 3.64912065  |   |             |             |             |
| H | -0.03293451  | -2.48953778 | 2.97404519  |   |             |             |             |
| H | -1.19036810  | -1.88066245 | 4.18381143  |   |             |             |             |
| H | -0.43406095  | -3.46720384 | 4.39517133  |   |             |             |             |
| C | -1.44112830  | -4.67061798 | 2.12121835  |   |             |             |             |
| H | -0.97043529  | -5.38905179 | 2.80648494  |   |             |             |             |
| H | -2.23826730  | -5.19430548 | 1.57980327  |   |             |             |             |
| H | -0.69019002  | -4.35558539 | 1.38792903  |   |             |             |             |
| C | -3.03737353  | -3.94704568 | 3.92038841  |   |             |             |             |
| H | -3.87979127  | -4.44706541 | 3.42560977  |   |             |             |             |
| H | -2.58642577  | -4.66565417 | 4.61678155  |   |             |             |             |
| H | -3.44180867  | -3.11254515 | 4.50623050  |   |             |             |             |
| H | -3.67499253  | -2.92285888 | 1.56583202  |   |             |             |             |
| N | -0.62303694  | 1.56207582  | 3.92044617  |   |             |             |             |
| C | 0.58038514   | 2.27461397  | 4.41223184  |   |             |             |             |
| C | 0.35257282   | 3.55443464  | 5.22944234  |   |             |             |             |
| H | -0.16991311  | 4.32583759  | 4.65406527  |   |             |             |             |
| H | 1.32263365   | 3.96720845  | 5.52848937  |   |             |             |             |
| H | -0.21874323  | 3.36605115  | 6.14469418  |   |             |             |             |
| H | 1.19160154   | 2.50523777  | 3.53265570  |   |             |             |             |
| H | 1.15421709   | 1.55781338  | 5.01063781  |   |             |             |             |
| C | -1.46643000  | 1.05968962  | 5.01354962  |   |             |             |             |
| H | -1.94867444  | 1.86421204  | 5.59191627  |   |             |             |             |
| H | -2.25509613  | 0.42471616  | 4.59728997  |   |             |             |             |
| H | -0.86158806  | 0.45571955  | 5.69829382  |   |             |             |             |
| C | -1.41740111  | 2.38018886  | 2.98731101  |   |             |             |             |
| H | -1.89111629  | 3.24620359  | 3.47623159  |   |             |             |             |
| H | -0.77874108  | 2.73367776  | 2.17265086  |   |             |             |             |

**Table 19.** Geometric coordinates and thermally corrected MP2 energies for 7 spirocyclic dimer unsymmetric with two DMEA isomer 1

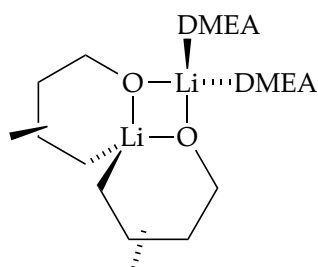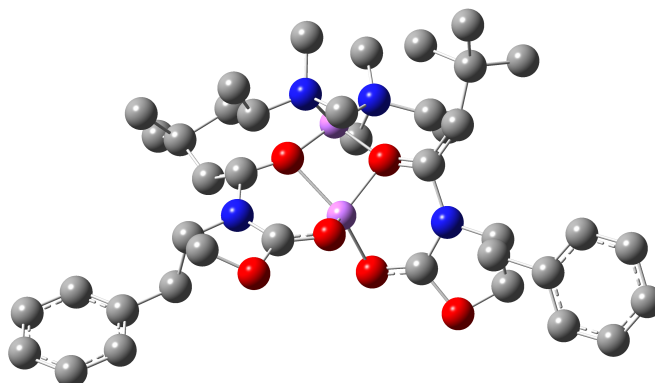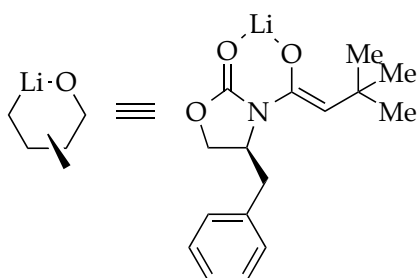

$G = -2246.320131$  Hartree

$G_{\text{MP2}} = -1404965.182$  kcal/mol

$\Delta G_{\text{MP2}} = 4.362089114$  kcal/mol Li vs. 7 dimer with two THF

| Atom | X          | Y           | Z          | Atom | X           | Y          | Z           |
|------|------------|-------------|------------|------|-------------|------------|-------------|
| Li   | 0.00000000 | 0.00000000  | 0.00000000 | H    | 5.97572311  | 2.59171249 | 3.41590780  |
| Li   | 0.00000000 | 0.00000000  | 2.46866470 | H    | 8.16132947  | 3.01174811 | 4.47760867  |
| O    | 1.20200552 | 0.00000000  | 1.10374828 | H    | 8.62586329  | 2.12051009 | 6.73625691  |
| C    | 2.32532366 | 0.37491804  | 1.48820188 | H    | 6.90116268  | 0.80142448 | 7.92431806  |
| N    | 2.64547604 | -0.20719815 | 2.85722849 | H    | 4.71074794  | 0.37920923 | 6.84971374  |
| C    | 3.90227098 | -0.02799573 | 3.50790365 | C    | 3.18186192  | 1.14399555 | 0.76973316  |
| C    | 3.97572274 | -1.32166531 | 4.32000952 | C    | 3.66866938  | 1.88127742 | -0.49555210 |
| H    | 4.15128744 | -2.14654393 | 3.66592651 | C    | 2.42838400  | 1.48297640 | -1.31655144 |
| H    | 4.75016286 | -1.29415229 | 5.05807134 | H    | 2.32985517  | 0.49940755 | -0.91204186 |
| O    | 2.65559257 | -1.45661899 | 4.87503712 | H    | 1.53755237  | 2.04305394 | -1.11482185 |
| C    | 1.85212937 | -1.02274139 | 3.73319263 | H    | 2.57758717  | 1.42164486 | -2.37482727 |
| O    | 0.57770834 | -1.32525276 | 3.57960279 | C    | 4.95697651  | 1.07817335 | -0.78716574 |
| H    | 4.73140173 | 0.07049382  | 2.83733573 | H    | 5.10576840  | 1.00763025 | -1.84125721 |
| C    | 3.85007815 | 1.24165518  | 4.37069623 | H    | 5.79646322  | 1.57110866 | -0.33867089 |
| H    | 3.65234050 | 2.08766539  | 3.74385448 | H    | 4.86148636  | 0.09392884 | -0.37058324 |
| H    | 3.07455760 | 1.14390627  | 5.09760147 | C    | 3.77724025  | 3.29640589 | -1.08959006 |
| C    | 5.20028226 | 1.46431584  | 5.06562320 | H    | 4.60935645  | 3.80675040 | -0.65217410 |
| C    | 5.45869531 | 0.94953228  | 6.34097203 | H    | 3.91705513  | 3.22729718 | -2.14785904 |
| C    | 6.69995522 | 1.18836010  | 6.94597416 | H    | 2.87854557  | 3.83948896 | -0.88359473 |
| C    | 7.67833793 | 1.93697128  | 6.27480669 | H    | 4.08759753  | 1.50057240 | 1.21289848  |
| C    | 7.41778715 | 2.44315145  | 4.99409138 | O    | -1.21529023 | 0.51754939 | 0.98062745  |
| C    | 6.17931232 | 2.20508529  | 4.39400163 | C    | -2.41342202 | 0.62416379 | 1.30206925  |

|   |             |             |             |   |             |             |             |
|---|-------------|-------------|-------------|---|-------------|-------------|-------------|
| N | -2.54694166 | 1.30837981  | 2.65470186  | H | -2.59497022 | 1.46138125  | -0.33731527 |
| C | -3.80366127 | 1.65199511  | 3.23574513  | N | 0.97684147  | -1.18090193 | -0.95094106 |
| C | -3.40057718 | 2.88263054  | 4.04910512  | C | 2.34961951  | -1.42708747 | -0.49231247 |
| H | -3.20124295 | 3.69853938  | 3.39059853  | C | 2.66832607  | -2.92694797 | -0.65088178 |
| H | -4.15949689 | 3.17617091  | 4.74417618  | H | 1.97849937  | -3.50138386 | -0.06699974 |
| O | -2.16539227 | 2.49359887  | 4.67519125  | H | 3.66446350  | -3.11896145 | -0.31748658 |
| C | -1.54176434 | 1.75811165  | 3.57621156  | H | 2.57596846  | -3.20058768 | -1.68136250 |
| O | -0.24565385 | 1.52910896  | 3.49308661  | H | 2.44069235  | -1.14887808 | 0.53807713  |
| H | -4.56829703 | 1.87831233  | 2.52095096  | H | 3.03500577  | -0.85333980 | -1.07771032 |
| C | -4.30296226 | 0.47999186  | 4.09379555  | C | 0.84949139  | -1.57822312 | -2.36603288 |
| H | -4.42438121 | -0.38563390 | 3.47434941  | H | 1.07628285  | -2.61900263 | -2.46857253 |
| H | -3.59067009 | 0.27515346  | 4.86194928  | H | -0.15274198 | -1.39782000 | -2.69637838 |
| C | -5.66480577 | 0.82140280  | 4.71377198  | H | 1.52965030  | -1.00475469 | -2.96135482 |
| C | -5.76355856 | 1.41778783  | 5.97585926  | C | 0.36180556  | -2.43487128 | -0.40910515 |
| C | -7.02729233 | 1.69973867  | 6.51184032  | H | 0.60379957  | -3.29763345 | -0.47668192 |
| C | -8.18615810 | 1.38811632  | 5.78517617  | H | 0.29474181  | -2.18469912 | 0.69096332  |
| C | -8.08176236 | 0.79869619  | 4.51788619  | H | -0.77856799 | -2.08807995 | -0.63567948 |
| C | -6.82113770 | 0.51722947  | 3.98665927  |   |             |             |             |
| H | -6.73720885 | 0.06521513  | 3.01906688  |   |             |             |             |
| H | -8.96200757 | 0.56206332  | 3.95924032  |   |             |             |             |
| H | -9.15130538 | 1.60221256  | 6.19393272  |   |             |             |             |
| H | -7.10892778 | 2.15109951  | 7.47981059  |   |             |             |             |
| H | -4.87819428 | 1.65413182  | 6.52702319  |   |             |             |             |
| C | -3.31441920 | -0.34537610 | 1.00285653  |   |             |             |             |
| C | -3.98752100 | -0.85106837 | -0.29048155 |   |             |             |             |
| C | -2.65041598 | -0.98982968 | -1.04140455 |   |             |             |             |
| H | -2.19145685 | -0.11884107 | -0.62730098 |   |             |             |             |
| H | -2.06583441 | -1.85317460 | -0.79469542 |   |             |             |             |
| H | -2.70843350 | -0.89227861 | -2.10586921 |   |             |             |             |
| C | -4.83566103 | 0.39117846  | -0.64717857 |   |             |             |             |
| H | -4.88987025 | 0.49709627  | -1.70739891 |   |             |             |             |
| H | -5.82359714 | 0.27820770  | -0.24706369 |   |             |             |             |
| H | -4.37984199 | 1.26419155  | -0.22118197 |   |             |             |             |
| C | -4.61680741 | -2.11755249 | -0.89651563 |   |             |             |             |
| H | -5.60430873 | -2.24961035 | -0.50715136 |   |             |             |             |
| H | -4.66313892 | -2.01657295 | -1.96043029 |   |             |             |             |
| H | -4.01850758 | -2.96832934 | -0.64503751 |   |             |             |             |
| H | -4.30882787 | -0.30701421 | 1.39474987  |   |             |             |             |
| H | -1.91679076 | 1.96062460  | 1.29304985  |   |             |             |             |
| C | -1.89798928 | 2.04990876  | 0.29132357  |   |             |             |             |
| N | -0.55671273 | 1.79166572  | -0.22158612 |   |             |             |             |
| C | -0.38655455 | 2.16354761  | -1.59889026 |   |             |             |             |
| H | -0.61395676 | 3.20106387  | -1.72934297 |   |             |             |             |
| H | 0.62239855  | 1.97873750  | -1.90548617 |   |             |             |             |
| H | -1.05348528 | 1.57475822  | -2.19422299 |   |             |             |             |
| C | 0.37607782  | 2.60238146  | 0.64639547  |   |             |             |             |
| H | 0.15004978  | 3.63987163  | 0.52413937  |   |             |             |             |
| H | 0.26091236  | 2.33337044  | 1.67736024  |   |             |             |             |
| H | 1.38370620  | 2.41799138  | 0.34064819  |   |             |             |             |
| C | -2.24199647 | 3.54518035  | 0.04956110  |   |             |             |             |
| H | -1.56518010 | 4.13470877  | 0.63362542  |   |             |             |             |
| H | -3.24494520 | 3.74168403  | 0.35906169  |   |             |             |             |
| H | -2.13021806 | 3.79577253  | -0.98485064 |   |             |             |             |

**Table 20.** Geometric coordinates and thermally corrected MP2 energies for 7 spirocyclic dimer unsymmetric with two DMEA isomer 2

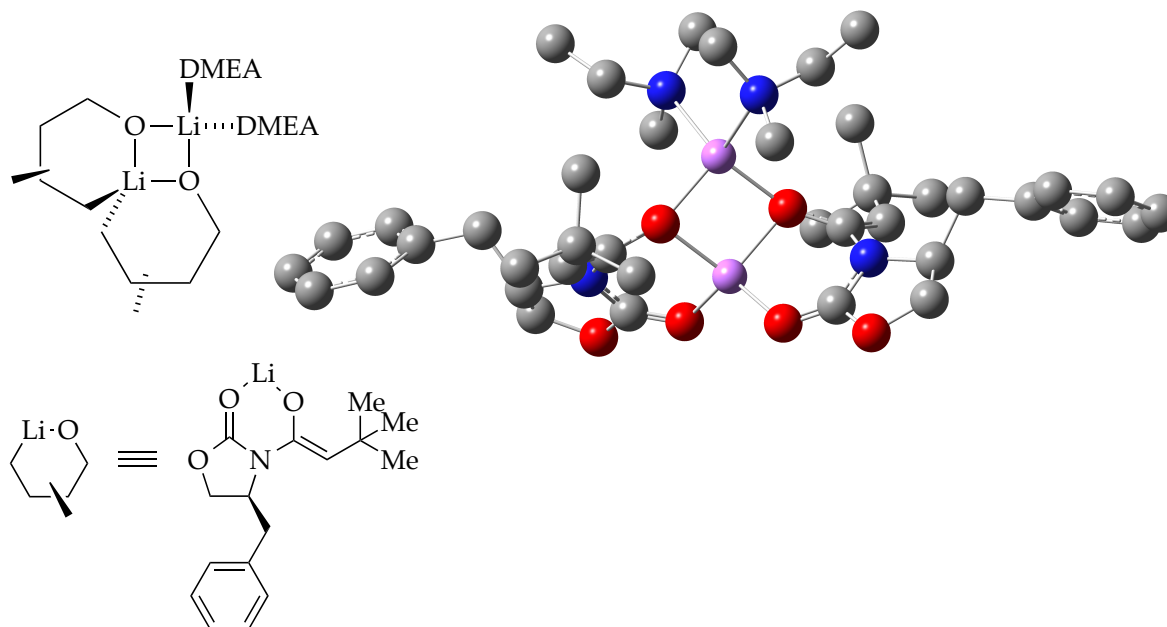

G = -2246.327343 Hartree

G<sub>MP2</sub> = -1404970.275 kcal/mol

ΔG<sub>MP2</sub> = 1.815589114 kcal/mol Li vs. 7 dimer with two THF

| Atom | X          | Y           | Z           | Atom | X          | Y           | Z           |
|------|------------|-------------|-------------|------|------------|-------------|-------------|
| Li   | 0.00000000 | 0.00000000  | 0.00000000  | H    | 6.96647948 | -2.04931723 | 0.40911467  |
| Li   | 0.00000000 | 0.00000000  | 2.57969880  | H    | 8.98193955 | -3.42620388 | 0.01826326  |
| O    | 1.44528174 | 0.00000000  | 1.29397709  | H    | 8.95788397 | -5.85727517 | 0.54895387  |
| C    | 2.59287998 | -0.33164444 | 0.77202927  | H    | 6.89474809 | -6.89245960 | 1.47769465  |
| N    | 2.61747893 | -1.68576768 | 0.18445682  | H    | 4.87900181 | -5.51258932 | 1.86403096  |
| C    | 1.64894887 | -2.09371471 | -0.69328142 | H    | 4.52759066 | -2.02866746 | -0.64866698 |
| O    | 1.98875288 | -3.28018035 | -1.25993804 | O    | 0.60285424 | -1.53198786 | -0.99001839 |
| C    | 3.20582485 | -3.75369367 | -0.65758693 | C    | 3.74228942 | 0.38594298  | 0.69237504  |
| H    | 2.95220686 | -4.53797203 | 0.06572678  | C    | 3.96580431 | 1.79628161  | 1.22252022  |
| H    | 3.83714873 | -4.17696318 | -1.43978157 | C    | 3.73834003 | 1.85096940  | 2.74895109  |
| C    | 3.81668470 | -2.52041069 | 0.03080859  | H    | 2.72971914 | 1.50680092  | 2.99323317  |
| C    | 4.53041324 | -2.84004093 | 1.35462804  | H    | 3.86285200 | 2.87317480  | 3.13216489  |
| H    | 3.82379707 | -3.35508557 | 2.01666938  | H    | 4.45312331 | 1.20409335  | 3.27247037  |
| H    | 4.78727297 | -1.88861463 | 1.83250128  | C    | 5.42429759 | 2.20358736  | 0.93152718  |
| C    | 5.77081573 | -3.68480831 | 1.15026318  | H    | 5.62940506 | 3.21720348  | 1.29736121  |
| C    | 5.77411196 | -5.05367717 | 1.44934882  | H    | 5.63015254 | 2.18775789  | -0.14596393 |
| C    | 6.91268763 | -5.83320784 | 1.23485581  | H    | 6.13143144 | 1.52046583  | 1.41974326  |
| C    | 8.07011752 | -5.25311836 | 0.71506418  | C    | 3.02217726 | 2.79946725  | 0.52005250  |
| C    | 8.08247252 | -3.88879987 | 0.41602899  | H    | 3.21991994 | 2.82585982  | -0.55766892 |
| C    | 6.94371607 | -3.11365130 | 0.63351397  | H    | 3.16044645 | 3.81608103  | 0.91447042  |

|   |             |             |             |   |             |             |            |
|---|-------------|-------------|-------------|---|-------------|-------------|------------|
| H | 1.97648208  | 2.50941122  | 0.65404414  | C | -2.55676163 | 2.67262940  | 5.15011158 |
| H | 4.57258338  | -0.05314871 | 0.14741899  | H | -2.63052306 | 3.59766406  | 4.56815132 |
| O | -1.44537925 | 0.00014505  | 1.29400472  | H | -3.57730069 | 2.35853327  | 5.39645140 |
| C | -2.59281403 | 0.33175713  | 0.77168434  | H | -2.04853251 | 2.90621062  | 6.09172789 |
| N | -2.61731797 | 1.68604092  | 0.18443960  | H | -1.86012794 | 0.63805138  | 4.98590289 |
| C | -1.64882411 | 2.09395781  | -0.69338285 | N | 0.45474454  | -1.77696981 | 3.95151569 |
| O | -1.98864311 | 3.28044840  | -1.26000055 | C | 1.85677738  | -1.54572940 | 4.37242749 |
| C | -3.20540208 | 3.75413372  | -0.65712794 | C | 2.55649385  | -2.67091780 | 5.15091779 |
| H | -2.95131022 | 4.53785501  | 0.06663375  | H | 2.63049186  | -3.59634542 | 4.56961043 |
| H | -3.83671211 | 4.17812397  | -1.43893620 | H | 3.57694957  | -2.35659536 | 5.39732135 |
| C | -3.81651689 | 2.52071538  | 0.03070792  | H | 2.04803939  | -2.90390887 | 6.09256238 |
| C | -4.53059214 | 2.83997737  | 1.35439800  | H | 2.42451647  | -1.31473980 | 3.46614451 |
| H | -4.78790001 | 1.88844713  | 1.83182390  | H | 1.85991194  | -0.63644298 | 4.98512338 |
| H | -3.82404594 | 3.35453579  | 2.01689362  | C | -0.43876911 | -1.97640348 | 5.09855058 |
| C | -5.77067427 | 3.68521417  | 1.14999719  | H | -0.24041767 | -2.91444804 | 5.64308045 |
| C | -6.94366744 | 3.11460133  | 0.63284657  | H | -1.47533470 | -2.00426056 | 4.75160761 |
| C | -8.08212687 | 3.89019370  | 0.41541087  | H | -0.32873695 | -1.14508451 | 5.80233502 |
| C | -8.06938134 | 5.25441519  | 0.71490500  | C | 0.33718904  | -2.90624430 | 3.01699673 |
| C | -6.91185846 | 5.83395710  | 1.23508623  | H | 0.57760491  | -3.87627772 | 3.48367541 |
| C | -5.77357307 | 5.05397973  | 1.44952376  | H | 1.00756208  | -2.74113479 | 2.17003694 |
| H | -4.87838075 | 5.51246857  | 1.86450558  | H | -0.68718170 | -2.95722949 | 2.63876089 |
| H | -6.89361233 | 6.89312018  | 1.47828653  |   |             |             |            |
| H | -8.95692810 | 5.85890690  | 0.54884365  |   |             |             |            |
| H | -8.98167841 | 3.42803254  | 0.01733472  |   |             |             |            |
| H | -6.96673135 | 2.05034807  | 0.40810075  |   |             |             |            |
| H | -4.52720507 | 2.02918415  | -0.64915765 |   |             |             |            |
| O | -0.60274887 | 1.53221283  | -0.99012890 |   |             |             |            |
| C | -3.74209683 | -0.38594842 | 0.69138053  |   |             |             |            |
| C | -3.96570751 | -1.79636759 | 1.22126555  |   |             |             |            |
| C | -3.02168227 | -2.79940295 | 0.51912185  |   |             |             |            |
| H | -1.97607283 | -2.50925333 | 0.65360926  |   |             |             |            |
| H | -3.21893947 | -2.82573165 | -0.55869213 |   |             |             |            |
| H | -3.16002354 | -3.81606790 | 0.91338703  |   |             |             |            |
| C | -3.73890152 | -1.85119592 | 2.74778822  |   |             |             |            |
| H | -3.86363140 | -2.87342318 | 3.13086448  |   |             |             |            |
| H | -4.45387421 | -1.20431590 | 3.27104241  |   |             |             |            |
| H | -2.73036625 | -1.50709611 | 2.99253620  |   |             |             |            |
| C | -5.42404695 | -2.20374752 | 0.92958973  |   |             |             |            |
| H | -6.13143810 | -1.52074567 | 1.41760003  |   |             |             |            |
| H | -5.62923827 | -3.21743082 | 1.29518782  |   |             |             |            |
| H | -5.62943841 | -2.18777477 | -0.14798751 |   |             |             |            |
| H | -4.57218609 | 0.05314393  | 0.14610950  |   |             |             |            |
| H | -2.42453728 | 1.31525938  | 3.46635404  |   |             |             |            |
| C | -1.85690065 | 1.54688012  | 4.37253612  |   |             |             |            |
| N | -0.45482651 | 1.77785410  | 3.95163354  |   |             |             |            |
| C | 0.43847689  | 1.97828783  | 5.09865303  |   |             |             |            |
| H | 0.23980755  | 2.91667379  | 5.64247649  |   |             |             |            |
| H | 1.47509096  | 2.00616131  | 4.75185785  |   |             |             |            |
| H | 0.32855239  | 1.14745215  | 5.80302645  |   |             |             |            |
| C | -0.33718405 | 2.90637289  | 3.01622345  |   |             |             |            |
| H | -0.57731380 | 3.87684162  | 3.48215752  |   |             |             |            |
| H | -1.00771171 | 2.74071581  | 2.16950232  |   |             |             |            |
| H | 0.68713689  | 2.95686272  | 2.63779759  |   |             |             |            |



**Table 21.** Geometric coordinates and thermally corrected MP2 energies for 7 D<sub>2d</sub> tetramer

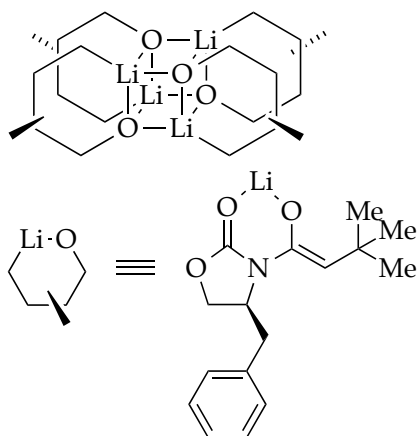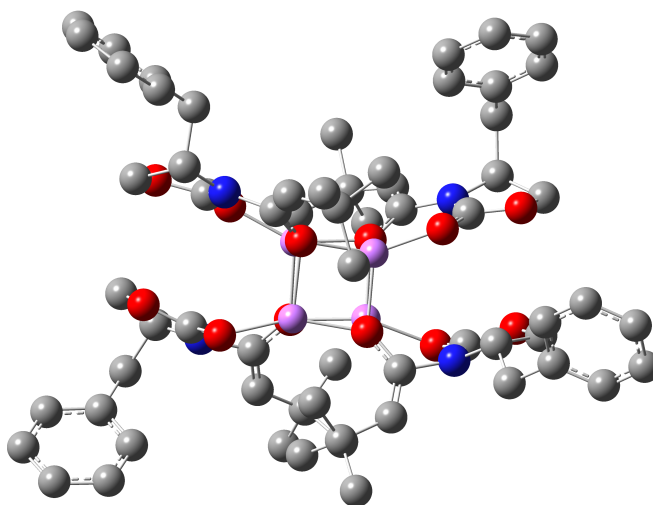

G = -3638.055774 Hartree

G<sub>MP2</sub> = -2275655.235 kcal/mol

ΔG<sub>MP2</sub> = -0.291028601 kcal/mol Li vs. 7 dimer with two THF

| Atom | X           | Y           | Z           | Atom | X           | Y           | Z           |
|------|-------------|-------------|-------------|------|-------------|-------------|-------------|
| Li   | 0.0000000   | 0.0000000   | 0.0000000   | H    | -2.30166648 | 3.61231414  | -3.84439176 |
| O    | 0.0000000   | 0.0000000   | 1.86336620  | N    | -0.52030903 | 2.83830694  | -3.02395097 |
| C    | 1.02009406  | 0.0000000   | 2.55043898  | C    | -1.05568420 | 2.03403244  | -1.92229953 |
| O    | 0.92543730  | -0.30211550 | 3.86973481  | C    | -2.22495143 | 2.46690030  | -1.38359735 |
| C    | 2.25293991  | -0.44110657 | 4.40657425  | H    | -2.61551485 | 3.39762875  | -1.77314759 |
| H    | 2.50250927  | -1.50643231 | 4.42894745  | C    | -3.08214376 | 1.89521396  | -0.25912448 |
| H    | 2.24992287  | -0.03035533 | 5.41718311  | C    | -4.47309076 | 2.56349979  | -0.36123268 |
| C    | 3.13892810  | 0.33850358  | 3.42654576  | H    | -4.39694423 | 3.65446066  | -0.26474142 |
| H    | 4.07521931  | -0.19606696 | 3.24865730  | H    | -4.94770169 | 2.34079201  | -1.32468112 |
| N    | 2.31068419  | 0.27029547  | 2.20769910  | H    | -5.13735938 | 2.20555907  | 0.43456820  |
| C    | 2.83919051  | 0.38928241  | 0.84006264  | O    | -0.33669325 | 0.97315460  | -1.62181582 |
| C    | 4.12746642  | 0.80733980  | 0.74168030  | Li   | -0.35817973 | -0.84297845 | -2.50081366 |
| H    | 4.63047829  | 1.02561695  | 1.67462511  | O    | -0.64366406 | -0.58070642 | -4.37919917 |
| C    | 5.09020535  | 0.96315770  | -0.42640312 | C    | 0.33293512  | -0.29110568 | -5.06891853 |
| C    | 6.15374457  | -0.15886296 | -0.32885753 | O    | 0.25980734  | 0.67741543  | -6.01232335 |
| H    | 6.66469373  | -0.13140350 | 0.64166782  | C    | 1.58260762  | 0.93286120  | -6.53786444 |
| H    | 5.69290612  | -1.14589804 | -0.43508662 | H    | 1.91517982  | 1.89579509  | -6.14659119 |
| H    | 6.91650179  | -0.04817421 | -1.11151538 | H    | 1.49800531  | 0.97314128  | -7.62520974 |
| O    | 1.98994545  | 0.04801005  | -0.10714520 | C    | 2.45512124  | -0.24523670 | -6.04810167 |
| Li   | 1.66370817  | 0.69859089  | -1.92114367 | H    | 3.36287410  | 0.11876036  | -5.55629874 |
| O    | 1.71053508  | 2.11233123  | -3.17348716 | N    | 1.57660768  | -0.83449543 | -5.02476670 |
| C    | 0.72746097  | 2.74340151  | -3.55662040 | C    | 2.02703343  | -1.63889663 | -3.88598198 |
| O    | 0.82270229  | 3.51099207  | -4.67802997 | C    | 2.75324013  | -2.74429744 | -4.18080714 |
| C    | -0.51131616 | 3.92414005  | -5.04967162 | H    | 2.81869962  | -2.98908397 | -5.23326634 |
| H    | -0.91017731 | 3.19317978  | -5.75944674 | C    | 3.46381484  | -3.73477584 | -3.26442099 |
| H    | -0.44908097 | 4.91036415  | -5.51045972 | C    | 4.40144931  | -4.59057702 | -4.14609397 |
| C    | -1.25972710 | 3.91126081  | -3.71646074 | H    | 3.83630008  | -5.12732173 | -4.91828813 |

|    |             |             |              |   |             |             |             |
|----|-------------|-------------|--------------|---|-------------|-------------|-------------|
| H  | 5.15105020  | -3.96714605 | -4.64931635  | C | -1.99661115 | 6.35225470  | -3.62649080 |
| H  | 4.93313762  | -5.33547217 | -3.54191079  | C | -3.39535272 | 6.33631494  | -3.51348861 |
| O  | 1.66602634  | -1.15397823 | -2.71271624  | C | -4.17523927 | 7.31332845  | -4.13128351 |
| Li | 1.64679077  | -1.77900884 | -0.87721112  | C | -3.56877549 | 8.32886790  | -4.87441878 |
| O  | 1.88456835  | -3.06098527 | 0.56123436   | C | -2.17912687 | 8.36044644  | -4.99110408 |
| C  | 0.93305411  | -3.16828188 | 1.33432382   | C | -1.40189536 | 7.37914193  | -4.37189610 |
| O  | 1.11801112  | -3.21797320 | 2.67807267   | H | -0.31796814 | 7.41694143  | -4.45845536 |
| C  | -0.16500682 | -3.41270132 | 3.31576311   | H | -1.69694472 | 9.15050042  | -5.56082902 |
| H  | -0.21206787 | -2.76183368 | 4.18771143   | H | -4.17560310 | 9.09188055  | -5.35432384 |
| H  | -0.23320305 | -4.46168914 | 3.62598324   | H | -5.25683284 | 7.28458628  | -4.02878455 |
| C  | -1.20760629 | -3.06367000 | 2.23824685   | H | -3.87792211 | 5.55554783  | -2.92895079 |
| H  | -1.49201785 | -2.00780101 | 2.31931051   | C | 3.46918455  | 1.77900159  | 3.90893062  |
| N  | -0.38474877 | -3.23831304 | 1.02334677   | H | 4.09831941  | 1.66760557  | 4.80193101  |
| C  | -0.83815912 | -2.94006802 | -0.33792647  | H | 4.08763569  | 2.26676630  | 3.15045508  |
| C  | -1.62357562 | -3.88785925 | -0.90135890  | C | 2.27857037  | 2.65707063  | 4.22820078  |
| C  | -2.31678111 | -3.91436679 | -2.25918530  | C | 1.85425074  | 2.84782732  | 5.55031793  |
| C  | -3.27370427 | -5.12709531 | -2.27280816  | C | 0.75192940  | 3.65266317  | 5.84207255  |
| H  | -2.72671623 | -6.06351858 | -2.10681998  | C | 0.05672370  | 4.28536866  | 4.81114907  |
| H  | -4.03618828 | -5.03901014 | -1.48889519  | C | 0.47603475  | 4.11450464  | 3.49013555  |
| H  | -3.78934108 | -5.20524435 | -3.23736370  | C | 1.57925909  | 3.31057471  | 3.20188688  |
| H  | -1.74776951 | -4.78474580 | -0.30230977  | H | 1.90940602  | 3.19466992  | 2.17254154  |
| O  | -0.40019369 | -1.78874611 | -0.81910693  | H | -0.05256767 | 4.61174708  | 2.68141504  |
| C  | -2.46696079 | -3.94009622 | 2.30270660   | H | -0.80103008 | 4.91370908  | 5.03526724  |
| H  | -3.09269982 | -3.70288203 | 1.43595084   | H | 0.44104259  | 3.78888214  | 6.87461248  |
| H  | -2.17567302 | -4.99339866 | 2.20855838   | H | 2.40073921  | 2.37220925  | 6.36259073  |
| C  | -3.23966546 | -3.72240512 | 3.58870401   | C | -2.48139434 | 2.25526475  | 1.12034812  |
| C  | -3.23709281 | -4.68560322 | 4.60610905   | H | -3.13033157 | 1.90360131  | 1.93427431  |
| C  | -3.93373845 | -4.47363347 | 5.79782615   | H | -1.49643884 | 1.80551461  | 1.26889260  |
| C  | -4.64532956 | -3.28949819 | 5.99068744   | H | -2.37469111 | 3.34226742  | 1.22133982  |
| C  | -4.65903875 | -2.32190990 | 4.98327037   | C | -3.29447616 | 0.37338010  | -0.36590815 |
| C  | -3.96412148 | -2.53833097 | 3.79388160   | H | -3.77745266 | 0.11873345  | -1.31555340 |
| H  | -3.98870128 | -1.78294244 | 3.01130470   | H | -2.36314267 | -0.19445018 | -0.31308178 |
| H  | -5.21546857 | -1.39867406 | 5.12192074   | H | -3.94530413 | 0.02392269  | 0.44702613  |
| H  | -5.18959269 | -3.12262246 | 6.91635699   | C | -3.15809273 | -2.64727526 | -2.51513098 |
| H  | -3.92254165 | -5.23632913 | 6.57219244   | H | -3.91590800 | -2.51903955 | -1.73390458 |
| H  | -2.69271085 | -5.61616015 | 4.45948279   | H | -2.55056970 | -1.73960179 | -2.53453641 |
| C  | 2.88405850  | -1.18116598 | -7.20736148  | H | -3.67090565 | -2.71680602 | -3.48282815 |
| H  | 3.54972264  | -0.58337128 | -7.84430756  | C | -1.28838702 | -4.09937154 | -3.39795940 |
| H  | 3.50526419  | -1.98164313 | -6.79483269  | H | -1.79308503 | -4.13978740 | -4.37251042 |
| C  | 1.76217818  | -1.74679681 | -8.05471788  | H | -0.56396377 | -3.28102394 | -3.43246508 |
| C  | 1.57312400  | -1.29524514 | -9.36885040  | H | -0.72736773 | -5.03112159 | -3.26466874 |
| C  | 0.54370307  | -1.79940820 | -10.16574689 | C | 2.45270265  | -4.68396443 | -2.58092792 |
| C  | -0.31921654 | -2.77035716 | -9.65801003  | H | 2.97227516  | -5.41105329 | -1.94295891 |
| C  | -0.14040804 | -3.23430076 | -8.35322250  | H | 1.74017834  | -4.14313524 | -1.95243143 |
| C  | 0.89047663  | -2.73040630 | -7.55950983  | H | 1.87741403  | -5.23789124 | -3.33142942 |
| H  | 1.01734941  | -3.10714930 | -6.54899346  | C | 4.33545820  | -3.03770588 | -2.20101313 |
| H  | -0.80405282 | -3.99427769 | -7.94940707  | H | 5.08194552  | -2.39057756 | -2.67476709 |
| H  | -1.12205477 | -3.16601022 | -10.27432590 | H | 3.75150435  | -2.41704012 | -1.51736903 |
| H  | 0.42021793  | -1.43514574 | -11.18238416 | H | 4.86331454  | -3.78087508 | -1.59025386 |
| H  | 2.24894164  | -0.54654903 | -9.77799816  | C | 4.44742224  | 0.93305356  | -1.81984741 |
| C  | -1.15968616 | 5.27117410  | -2.97605583  | H | 3.93462949  | -0.01075729 | -2.02211598 |
| H  | -1.46383386 | 5.12540337  | -1.93538848  | H | 3.74390036  | 1.76127881  | -1.94886390 |
| H  | -0.10466862 | 5.57080397  | -2.95754897  | H | 5.22241839  | 1.05433667  | -2.58792758 |

|   |            |            |             |
|---|------------|------------|-------------|
| C | 5.80805714 | 2.32550808 | -0.26475788 |
| H | 6.57037521 | 2.45994461 | -1.04283859 |
| H | 5.09551756 | 3.15542127 | -0.33856192 |
| H | 6.30997808 | 2.39887826 | 0.70847080  |

**Table 22.** Geometric coordinates and thermally corrected MP2 energies for 7 S<sub>4</sub> tetramer

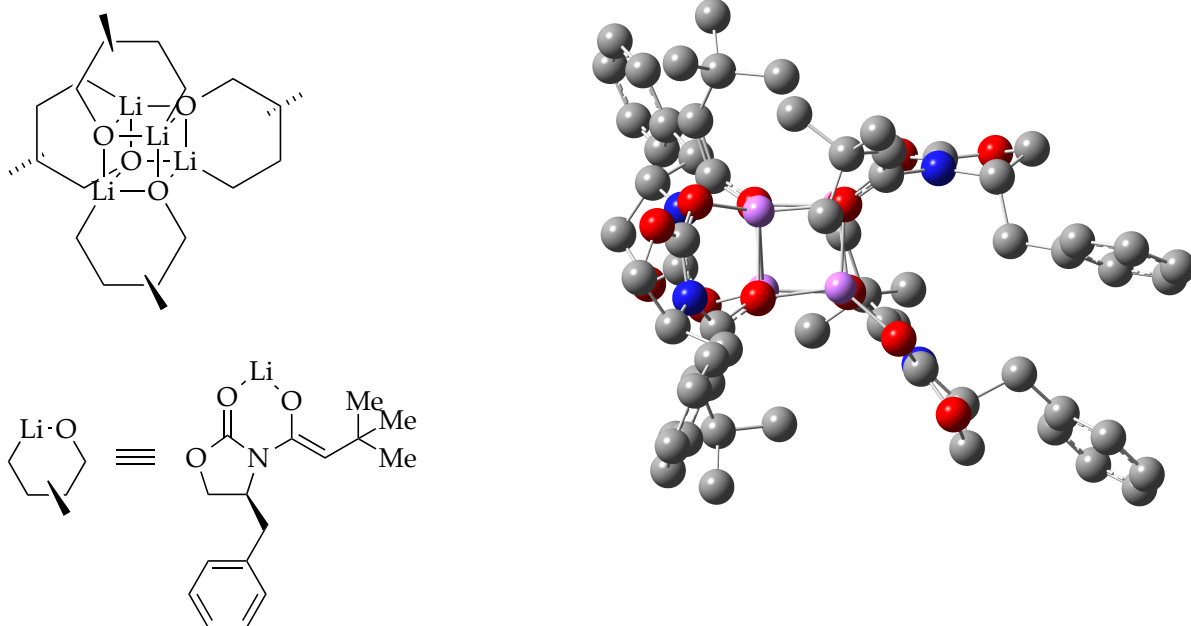

G = -3638.063057 Hartree

G<sub>MP2</sub> = -2275651.674 kcal/mol

ΔG<sub>MP2</sub> = 0.599221399 kcal/mol Li vs. 7 dimer with two THF

| Atom | X           | Y           | Z           | Atom | X           | Y           | Z           |
|------|-------------|-------------|-------------|------|-------------|-------------|-------------|
| Li   | 0.0000000   | 0.0000000   | 0.0000000   | N    | -1.81186936 | -3.49391964 | -0.75020971 |
| O    | 0.0000000   | 0.0000000   | 1.87142950  | C    | -1.96086094 | -2.03557271 | -0.61761867 |
| C    | 1.05961540  | 0.0000000   | 2.49497578  | O    | -0.94893622 | -1.32772773 | -1.08511021 |
| O    | 1.13549623  | 0.60388581  | 3.70668323  | Li   | -0.54039896 | -0.14252202 | -2.57461249 |
| C    | 2.41215309  | 0.30764109  | 4.30272648  | O    | -1.45555498 | 0.96581420  | -3.79584722 |
| H    | 2.26158478  | -0.45953830 | 5.06942823  | C    | -0.90461355 | 2.03398499  | -4.05379660 |
| H    | 2.79222482  | 1.21604887  | 4.77284953  | O    | -0.96998877 | 2.55768648  | -5.30538955 |
| C    | 3.29095007  | -0.19294286 | 3.14111253  | C    | -0.43047783 | 3.89443002  | -5.27040700 |
| H    | 3.83199805  | -1.08877814 | 3.45191951  | H    | -1.26477534 | 4.60057199  | -5.19404532 |
| N    | 2.26051768  | -0.53271896 | 2.14514905  | H    | 0.11269034  | 4.07127669  | -6.19952407 |
| C    | 2.54925687  | -1.22444835 | 0.88167079  | C    | 0.46130506  | 3.91185787  | -4.02021802 |
| O    | 1.85248896  | -0.79473546 | -0.15264382 | H    | 0.37635606  | 4.86803529  | -3.50203313 |
| Li   | 0.91765903  | -1.98151615 | -1.39717779 | N    | -0.17202733 | 2.83687646  | -3.23750025 |
| O    | 0.50147966  | -3.75419226 | -1.07027294 | C    | 0.07474813  | 2.60734760  | -1.80703802 |
| C    | -0.64826299 | -4.17316242 | -0.95521753 | O    | 0.28030163  | 1.35014752  | -1.46444632 |
| O    | -0.88017132 | -5.50647444 | -1.05257912 | Li   | 1.94379512  | 0.37586633  | -1.69753904 |
| C    | -2.24362903 | -5.77071012 | -0.68137654 | O    | 3.40875714  | 0.93333521  | -2.66189854 |
| H    | -2.25674072 | -6.12166903 | 0.35640075  | C    | 3.77550758  | 0.33968592  | -3.67260340 |
| H    | -2.63511199 | -6.55312939 | -1.33298819 | O    | 5.01593497  | 0.59257833  | -4.16787160 |
| C    | -2.95655674 | -4.42129492 | -0.84805289 | C    | 5.29569340  | -0.35763355 | -5.21105076 |
| H    | -3.64668693 | -4.26939557 | -0.01700266 | H    | 5.86189747  | -1.19107479 | -4.78051563 |

|   |             |             |              |   |             |             |             |
|---|-------------|-------------|--------------|---|-------------|-------------|-------------|
| H | 5.89357493  | 0.13545412  | -5.97841754  | H | -5.70720187 | -1.12681004 | 0.52356994  |
| C | 3.90773088  | -0.78393132 | -5.69114052  | H | -5.75834438 | 0.58710241  | 0.08071051  |
| H | 3.90430750  | -1.84143100 | -5.95945755  | C | -3.71744062 | -4.26405059 | -2.18445213 |
| N | 3.12346858  | -0.57013821 | -4.45809830  | H | -3.97475612 | -3.20480820 | -2.28908932 |
| C | 1.81854191  | -1.20757167 | -4.20018333  | H | -3.03650504 | -4.51588137 | -3.00576937 |
| O | 1.27355160  | -0.91174661 | -3.03991775  | C | -4.96251658 | -5.12139427 | -2.24736915 |
| C | 1.35442214  | -2.02926244 | -5.17701856  | C | -6.11378232 | -4.75671870 | -1.53254007 |
| H | 1.98531071  | -2.15946715 | -6.04634601  | H | -6.11683635 | -3.83097878 | -0.96069229 |
| C | 0.10821599  | -2.90277629 | -5.25120596  | C | -7.25633609 | -5.55571267 | -1.55958970 |
| C | 0.43451806  | -4.31698775 | -4.71109461  | H | -8.13964328 | -5.25299943 | -1.00329595 |
| H | 0.70872865  | -4.28179341 | -3.65205652  | C | -7.26931661 | -6.73686363 | -2.30549787 |
| H | -0.42956902 | -4.98789547 | -4.81971512  | C | -6.13406314 | -7.10865271 | -3.02585532 |
| H | 1.27252721  | -4.76299411 | -5.26069643  | C | -4.99150213 | -6.30610200 | -2.99542757 |
| C | 3.38224747  | 0.07809992  | -6.86735184  | H | -4.11489516 | -6.59583834 | -3.57122426 |
| H | 2.30891760  | -0.10943907 | -6.97071342  | H | -6.13684505 | -8.02098469 | -3.61659096 |
| H | 3.50140527  | 1.13369737  | -6.59231893  | H | -8.16031964 | -7.35843977 | -2.32933077 |
| C | 4.09982930  | -0.20321262 | -8.16961738  | C | 3.50823843  | -2.17891026 | 0.96511645  |
| C | 3.81815854  | -1.36704453 | -8.90123654  | H | 3.83467111  | -2.41433908 | 1.97429847  |
| H | 3.05260344  | -2.05287176 | -8.54401562  | C | 4.24817394  | -3.00868846 | -0.07353987 |
| C | 4.49451694  | -1.64832688 | -10.08779553 | C | 5.74629819  | -2.99603522 | 0.32201281  |
| H | 4.25841842  | -2.55307846 | -10.64176401 | H | 6.15983619  | -1.98120270 | 0.27317859  |
| C | 5.46638503  | -0.76706010 | -10.56756522 | H | 5.88998993  | -3.37183591 | 1.34319260  |
| C | 5.75275613  | 0.39683517  | -9.85392969  | H | 6.33245472  | -3.63461950 | -0.35094264 |
| C | 5.07399086  | 0.67417460  | -8.66525589  | C | 4.30447007  | 0.84184003  | 2.60277747  |
| H | 5.29449722  | 1.59018810  | -8.12079567  | H | 4.69794987  | 0.44842541  | 1.65877671  |
| H | 6.50163687  | 1.09297646  | -10.22243656 | H | 3.77236430  | 1.77071878  | 2.37030105  |
| H | 5.99165279  | -0.98436155 | -11.49361768 | C | 5.43372814  | 1.10531487  | 3.57491729  |
| C | 0.08487682  | 3.72896949  | -1.04829713  | C | 6.45255769  | 0.15710506  | 3.75502892  |
| H | -0.22135540 | 4.64122264  | -1.55195899  | H | 6.44360808  | -0.75597800 | 3.16305465  |
| C | 0.43630428  | 3.91053346  | 0.42153816   | C | 7.48250314  | 0.37731860  | 4.66886643  |
| C | -0.71498240 | 3.42965958  | 1.33427784   | H | 8.26511340  | -0.36719754 | 4.78971767  |
| H | -0.88728406 | 2.35571477  | 1.23310322   | C | 7.51369824  | 1.55434036  | 5.42073987  |
| H | -0.48582176 | 3.62812919  | 2.38987229   | C | 6.51058367  | 2.50822549  | 5.24805319  |
| H | -1.64817275 | 3.94822597  | 1.08567486   | C | 5.48017569  | 2.28330503  | 4.33248836  |
| C | 1.95018044  | 3.60749753  | -4.30082512  | H | 4.70952269  | 3.03866611  | 4.19343633  |
| H | 2.43616556  | 3.40060098  | -3.34168299  | H | 6.53037474  | 3.43117893  | 5.82172735  |
| H | 2.00684078  | 2.68399230  | -4.88982000  | H | 8.31759619  | 1.72818211  | 6.13091779  |
| C | 2.65347677  | 4.73774386  | -5.01986530  | C | -3.17784842 | 0.85339234  | -0.77397838 |
| C | 2.92003732  | 4.67212493  | -6.39431953  | H | -2.12875826 | 1.08585576  | -0.58183062 |
| H | 2.64215832  | 3.77922286  | -6.95101979  | H | -3.26680165 | 0.56809276  | -1.82748320 |
| C | 3.54722657  | 5.72995731  | -7.05642179  | H | -3.74409283 | 1.78211378  | -0.62837987 |
| H | 3.74807667  | 5.65645826  | -8.12213100  | C | -3.53840786 | 0.18487314  | 1.63351896  |
| C | 3.91786760  | 6.87491566  | -6.35096082  | H | -2.47867473 | 0.27665245  | 1.88802546  |
| C | 3.66093408  | 6.95314094  | -4.98003472  | H | -4.02791126 | 1.14912134  | 1.82660253  |
| C | 3.03539954  | 5.89411504  | -4.32298553  | H | -3.98043157 | -0.55647688 | 2.31114032  |
| H | 2.84978265  | 5.95737234  | -3.25263699  | C | 1.74279675  | 3.17984881  | 0.79313600  |
| H | 3.95373458  | 7.83782643  | -4.42067144  | H | 1.67267085  | 2.10484952  | 0.61092852  |
| H | 4.40784741  | 7.69852905  | -6.86317733  | H | 2.58488597  | 3.56343864  | 0.20442116  |
| C | -3.12317134 | -1.61901535 | -0.05804058  | H | 1.97184576  | 3.33233358  | 1.85619566  |
| H | -3.75678189 | -2.39997632 | 0.34806254   | C | 0.64939491  | 5.42056576  | 0.66883388  |
| C | -3.72882592 | -0.23906938 | 0.15642941   | H | 1.46212051  | 5.81383053  | 0.04515211  |
| C | -5.24805672 | -0.36353442 | -0.11849759  | H | -0.25895697 | 5.99104634  | 0.43756960  |
| H | -5.43953688 | -0.63830632 | -1.16294210  | H | 0.90579929  | 5.61174341  | 1.71790016  |

|   |             |             |             |
|---|-------------|-------------|-------------|
| C | -1.11281197 | -2.33755801 | -4.50493041 |
| H | -0.97329782 | -2.35484428 | -3.42119468 |
| H | -1.32912686 | -1.30962562 | -4.81303995 |
| H | -1.99940493 | -2.94533556 | -4.72817466 |
| C | -0.27453116 | -3.02747506 | -6.74495290 |
| H | -0.53946707 | -2.05057851 | -7.16657966 |
| H | 0.55469598  | -3.43874250 | -7.33582899 |
| H | -1.13448855 | -3.69646858 | -6.87179827 |
| C | 4.14242552  | -2.47316767 | -1.51030921 |
| H | 3.13241441  | -2.55901020 | -1.91658119 |
| H | 4.44316697  | -1.42164125 | -1.56155194 |
| H | 4.80324292  | -3.05246417 | -2.16817593 |
| C | 3.74508056  | -4.47158112 | -0.02934411 |
| H | 2.69417634  | -4.53320371 | -0.32510699 |
| H | 4.33445915  | -5.10458470 | -0.70703559 |
| H | 3.84017899  | -4.88724660 | 0.98164402  |

**Table 23.** Geometric coordinates and thermally corrected MP2 energies for 18 dimer with two THF

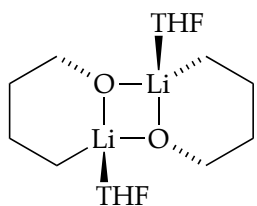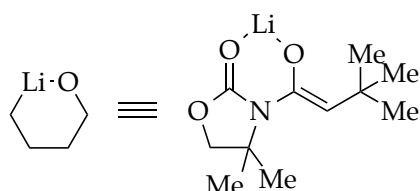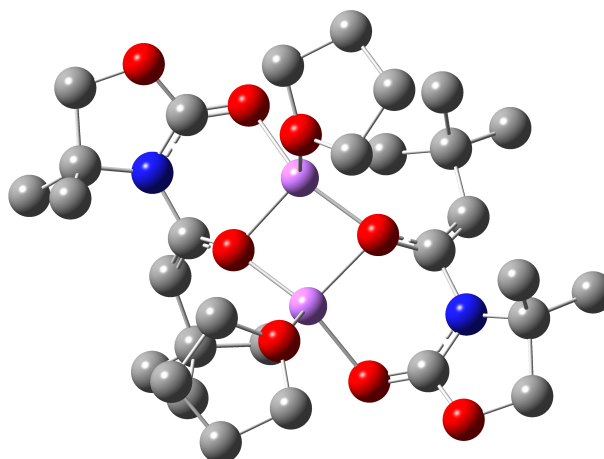

G = -1900.356246 Hartree

G<sub>MP2</sub> = -1188641.471 kcal/mol

ΔG<sub>MP2</sub> = 1.153086457 kcal/mol Li vs. 18-Li dimer trans with two THF

| Atom | X           | Y           | Z           | Atom | X           | Y           | Z           |
|------|-------------|-------------|-------------|------|-------------|-------------|-------------|
| Li   | 0.00000000  | 0.00000000  | 0.00000000  | C    | -1.69588031 | -1.65977763 | -5.86991360 |
| O    | 0.00000000  | 0.00000000  | 1.95994010  | H    | -2.16374140 | -2.59482828 | -6.19953774 |
| C    | 1.13192501  | 0.00000000  | 2.44079758  | H    | -1.63919412 | -0.96496088 | -6.71093966 |
| N    | 2.19061060  | -0.77487976 | 2.10163807  | C    | -2.41175525 | -1.06860882 | -4.63410723 |
| C    | 3.43361360  | -0.25062428 | 2.72793098  | N    | -1.56377810 | -1.66799866 | -3.56930236 |
| C    | 2.79643034  | 0.56433655  | 3.87641068  | C    | -1.71625417 | -1.39340117 | -2.12348323 |
| H    | 2.72927239  | -0.02253361 | 4.79995778  | C    | -2.80465930 | -1.95843024 | -1.54419069 |
| H    | 3.31448903  | 1.50439393  | 4.07942744  | C    | -3.27934885 | -1.81607666 | -0.10379532 |
| O    | 1.46217834  | 0.87002950  | 3.43608724  | C    | -2.31074096 | -2.52818328 | 0.86898495  |
| C    | 4.18948124  | 0.65062360  | 1.73657005  | H    | -1.30545865 | -2.10155549 | 0.82617710  |
| H    | 5.09171268  | 1.06281432  | 2.20376825  | H    | -2.66420615 | -2.44516292 | 1.90564940  |
| H    | 4.49139333  | 0.07367009  | 0.85720927  | H    | -2.23215282 | -3.59271164 | 0.61939530  |
| H    | 3.55956075  | 1.48219588  | 1.40284625  | C    | -3.43511672 | -0.33284723 | 0.29970122  |
| C    | 4.35593392  | -1.33996946 | 3.27849208  | H    | -4.18336243 | 0.16102631  | -0.33319185 |
| H    | 3.81498877  | -2.01074574 | 3.95341213  | H    | -3.76050721 | -0.24532044 | 1.34439894  |
| H    | 4.78032156  | -1.93565680 | 2.46717874  | H    | -2.49546936 | 0.21553661  | 0.19375177  |
| H    | 5.17886292  | -0.87666295 | 3.83625931  | C    | -4.66307453 | -2.49017918 | 0.01282838  |
| C    | 2.15392330  | -1.58749237 | 0.86577211  | H    | -5.39386172 | -2.01458735 | -0.65378767 |
| O    | 1.71024891  | -0.95035176 | -0.18456591 | H    | -4.60664222 | -3.55278437 | -0.25453342 |
| Li   | 1.08138965  | -1.14977045 | -1.97225976 | H    | -5.04712960 | -2.42224907 | 1.03803870  |
| O    | 0.65993630  | -2.34870740 | -3.46432792 | H    | -3.37961375 | -2.63367124 | -2.16871521 |
| C    | -0.35610424 | -2.01908503 | -4.07382737 | O    | -0.78155709 | -0.63376880 | -1.61820198 |
| O    | -0.35696259 | -1.95218007 | -5.43476173 | C    | -2.31134759 | 0.46587187  | -4.59328425 |

|   |             |             |             |
|---|-------------|-------------|-------------|
| H | -2.91211249 | 0.91119482  | -5.39513676 |
| H | -2.68361712 | 0.84273385  | -3.63584386 |
| H | -1.27343826 | 0.79485062  | -4.71245051 |
| C | -3.87409736 | -1.51540411 | -4.58519644 |
| H | -3.95273134 | -2.60706695 | -4.57231774 |
| H | -4.37006909 | -1.12330378 | -3.69443880 |
| H | -4.40223456 | -1.14018053 | -5.47021027 |
| O | 2.27646772  | 0.14027913  | -3.02019889 |
| C | 2.81468574  | -0.09304498 | -4.33140283 |
| C | 4.30601165  | -0.35661744 | -4.09174958 |
| C | 4.62600294  | 0.49689680  | -2.83477561 |
| C | 3.23880926  | 0.95671294  | -2.32932642 |
| H | 3.05510863  | 2.01184179  | -2.57930017 |
| H | 3.07051360  | 0.79886711  | -1.26419268 |
| H | 5.26124674  | 1.35625583  | -3.07171618 |
| H | 5.14588875  | -0.09951785 | -2.07972329 |
| H | 4.91805678  | -0.08617155 | -4.95768212 |
| H | 4.46582708  | -1.41890407 | -3.88449412 |
| H | 2.26819154  | -0.93099386 | -4.76355037 |
| H | 2.66166813  | 0.80498331  | -4.95027630 |
| C | 2.59549773  | -2.86234158 | 1.00446704  |
| H | 2.82124613  | -3.18039063 | 2.01661159  |
| C | 2.74688554  | -3.92427464 | -0.07706658 |
| C | 3.60308929  | -3.41519001 | -1.25807740 |
| H | 4.61465304  | -3.16010600 | -0.91747735 |
| H | 3.68897935  | -4.18391540 | -2.03693358 |
| H | 3.17049956  | -2.52132374 | -1.71497499 |
| C | 1.36429088  | -4.38970336 | -0.59030026 |
| H | 0.79808781  | -3.56738653 | -1.03487309 |
| H | 1.47206906  | -5.17152564 | -1.35426570 |
| H | 0.76796822  | -4.79787690 | 0.23400929  |
| C | 3.46595296  | -5.14074483 | 0.54410471  |
| H | 4.46062167  | -4.86577678 | 0.91778803  |
| H | 2.89237687  | -5.54913795 | 1.38554685  |
| H | 3.59252769  | -5.94099950 | -0.19531330 |
| O | -0.02729306 | 2.03182316  | -0.24836017 |
| C | -0.50209103 | 2.60289994  | -1.48059370 |
| C | -1.76530084 | 3.41535872  | -1.11261478 |
| C | -1.70696241 | 3.52371031  | 0.43520185  |
| C | -0.30769347 | 2.99808033  | 0.77687268  |
| H | -0.23574558 | 2.48569630  | 1.73596073  |
| H | 0.44363053  | 3.80202107  | 0.73144863  |
| H | -2.46570328 | 2.88218339  | 0.89313632  |
| H | -1.86505899 | 4.54424405  | 0.79727511  |
| H | -2.67548254 | 2.90123353  | -1.43407751 |
| H | -1.75329479 | 4.39803733  | -1.59466259 |
| H | 0.28108445  | 3.25356593  | -1.89628731 |
| H | -0.68241243 | 1.76902617  | -2.15874284 |



**Table 24.** Geometric coordinates and thermally corrected MP2 energies for **18** dimer trans with two THF

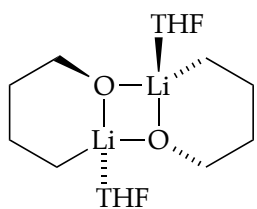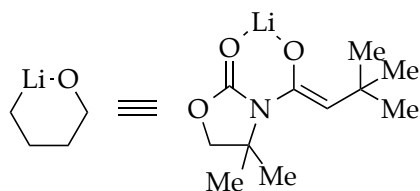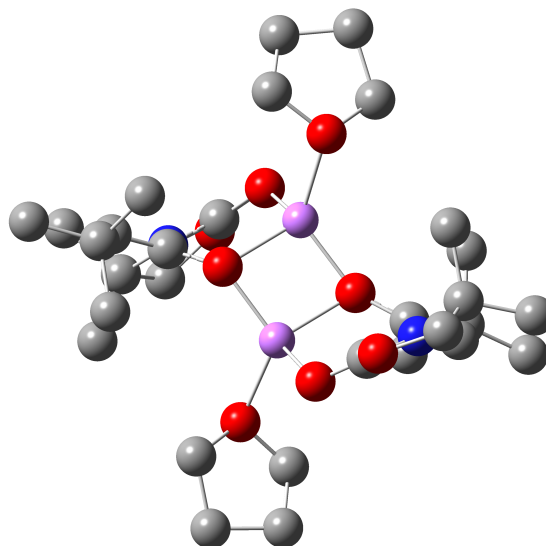

$G = -1900.363388$  Hartree

$G_{\text{MP2}} = -1188643.777$  kcal/mol

$\Delta G_{\text{MP2}} = 0$  kcal/mol Li vs. 18-Li dimer trans with two THF

| Atom | X           | Y           | Z           | Atom | X           | Y           | Z           |
|------|-------------|-------------|-------------|------|-------------|-------------|-------------|
| Li   | 0.0000000   | 0.0000000   | 0.0000000   | H    | -4.34235453 | -0.92202317 | -3.79550398 |
| O    | 0.0000000   | 0.0000000   | 1.88548830  | H    | -4.64548477 | -2.21618408 | -2.61844424 |
| C    | 0.84877770  | 0.0000000   | 2.87446071  | H    | -5.85970008 | -0.94727391 | -2.86964671 |
| N    | 1.64306499  | -1.23695890 | 2.97597335  | C    | -1.88723680 | -2.57788055 | -2.19713438 |
| C    | 3.11947066  | -1.36248601 | 3.10853301  | C    | -1.27252165 | -3.95527353 | -1.97026611 |
| C    | 3.29092324  | -2.78524037 | 2.52606047  | C    | 0.25009777  | -3.86435290 | -1.72426518 |
| H    | 3.52163666  | -2.76114194 | 1.45438242  | H    | 0.75978089  | -3.44001596 | -2.59806340 |
| H    | 4.04384718  | -3.37828455 | 3.04941653  | H    | 0.46059829  | -3.22993527 | -0.85886074 |
| O    | 2.01511270  | -3.42591744 | 2.69977751  | H    | 0.67624673  | -4.85903782 | -1.53634519 |
| C    | 1.06762201  | -2.45414175 | 2.80071546  | C    | -1.51961191 | -4.81072607 | -3.22925973 |
| O    | -0.12865726 | -2.73183954 | 2.74265517  | H    | -1.09544185 | -5.81535267 | -3.11093901 |
| Li   | -1.24916095 | -1.46735698 | 1.71853486  | H    | -2.59320830 | -4.92058946 | -3.42906718 |
| O    | -1.27979578 | -1.45607352 | -0.16536285 | H    | -1.05970736 | -4.35249707 | -4.11399558 |
| C    | -1.88392361 | -1.54629572 | -1.31652437 | C    | -1.93302692 | -4.65485791 | -0.75982053 |
| N    | -2.66295158 | -0.35071685 | -1.70249855 | H    | -3.01277477 | -4.76796285 | -0.91737976 |
| C    | -4.15048767 | -0.30080682 | -1.71577933 | H    | -1.50611462 | -5.65460506 | -0.60318803 |
| C    | -4.33717937 | 1.20599155  | -2.00846845 | H    | -1.77713256 | -4.07391135 | 0.15398791  |
| H    | -4.46014120 | 1.39824565  | -3.08099440 | H    | -2.38419522 | -2.41373060 | -3.14745669 |
| H    | -5.17106527 | 1.65154875  | -1.46145248 | O    | -2.92992609 | -1.65782462 | 2.79650534  |
| O    | -3.12283297 | 1.83855710  | -1.57182279 | C    | -3.50076379 | -2.99083136 | 2.79325887  |
| C    | -2.15603011 | 0.88943616  | -1.47241254 | C    | -3.91581641 | -3.27918211 | 4.23904324  |
| O    | -0.99520474 | 1.19813793  | -1.20958222 | C    | -2.91195436 | -2.43287809 | 5.03694989  |
| C    | -4.70838867 | -0.69272097 | -0.33815974 | C    | -2.78363664 | -1.18849852 | 4.16090959  |
| H    | -5.80290441 | -0.62507863 | -0.33565013 | H    | -1.81700573 | -0.68701163 | 4.24219587  |
| H    | -4.42549568 | -1.72224917 | -0.10011830 | H    | -3.58027837 | -0.46112556 | 4.36679414  |
| H    | -4.31413536 | -0.04290692 | 0.44940579  | H    | -1.94672084 | -2.94624081 | 5.10008303  |
| C    | -4.78312406 | -1.15120769 | -2.81978943 | H    | -3.25120311 | -2.19847344 | 6.05066241  |

|   |             |             |             |
|---|-------------|-------------|-------------|
| H | -3.86864243 | -4.34610893 | 4.47638650  |
| H | -4.94039056 | -2.93420283 | 4.42347888  |
| H | -4.33771105 | -3.00388611 | 2.08844844  |
| H | -2.73304140 | -3.69239229 | 2.44775990  |
| C | 3.56859311  | -1.33693068 | 4.58121329  |
| H | 4.63947957  | -1.56405340 | 4.64771529  |
| H | 3.40562806  | -0.35610794 | 5.03357103  |
| H | 3.02171652  | -2.08427794 | 5.16638719  |
| C | 3.86829858  | -0.31992985 | 2.27662807  |
| H | 3.52266584  | -0.33581112 | 1.23799337  |
| H | 3.70583723  | 0.68293417  | 2.67992592  |
| H | 4.94408034  | -0.53157560 | 2.29628734  |
| C | 1.07775116  | 0.98064024  | 3.78252086  |
| H | 1.76181495  | 0.76552067  | 4.59568620  |
| C | 0.45073013  | 2.37167260  | 3.76984099  |
| C | 0.77711907  | 3.11658744  | 2.45530100  |
| H | 1.86171292  | 3.21951153  | 2.32542636  |
| H | 0.37686258  | 2.57442312  | 1.59385147  |
| H | 0.33991217  | 4.12426622  | 2.45648036  |
| C | 1.03457975  | 3.17595030  | 4.94883316  |
| H | 0.61135046  | 4.18732245  | 4.98250081  |
| H | 0.81581414  | 2.68731372  | 5.90681154  |
| H | 2.12462611  | 3.27024099  | 4.86177281  |
| C | -1.08463227 | 2.29782332  | 3.93154504  |
| H | -1.35241667 | 1.83001587  | 4.88703528  |
| H | -1.53050468 | 3.30160594  | 3.91129840  |
| H | -1.52514194 | 1.70793466  | 3.12270864  |
| O | 1.81342185  | 0.21692120  | -0.87830021 |
| C | 2.25595091  | 1.59925882  | -0.92990658 |
| C | 2.92549204  | 1.77236160  | -2.29458836 |
| C | 2.13787674  | 0.77946132  | -3.16322541 |
| C | 1.91555255  | -0.38207351 | -2.19504671 |
| H | 2.76451668  | -1.07864687 | -2.19382042 |
| H | 0.99856379  | -0.94480020 | -2.38591523 |
| H | 2.67210781  | 0.47315233  | -4.06783476 |
| H | 1.17576825  | 1.21299711  | -3.45668840 |
| H | 3.98338147  | 1.48663876  | -2.24708684 |
| H | 2.86739149  | 2.80355221  | -2.65545910 |
| H | 1.37770987  | 2.24588682  | -0.82882421 |
| H | 2.92499791  | 1.77087022  | -0.08228179 |

## Part 6: 5 Ground State Computations

---

Geometries are optimized at the B3LYP level of theory using the 6-31G(d) basis set. Energies are defined as follows: G is the sum of electronic and thermal free energies calculated at the B3LYP level of theory (T = 195 K).  $G_{\text{MP2}}$  is derived from an MP2 SP calculation corresponding to the DFT-optimized geometry and includes a thermal correction from the DFT calculation.

**Table 25.** Geometric coordinates and thermally corrected MP2 energies for 5 dimer with no THF

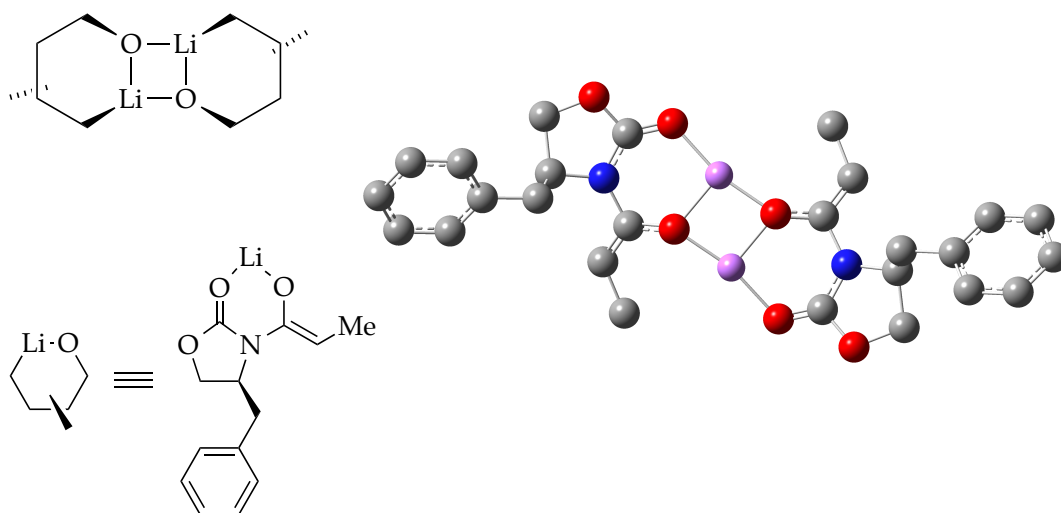

G = -1583.317665 Hartree

$G_{\text{MP2}} = -990442.4092$  kcal/mol

$\Delta G_{\text{MP2}} = 11.86946681$  kcal/mol Li vs. 5 spirocyclic dimer with three THF

| Atom | X           | Y           | Z           | Atom | X           | Y           | Z           |
|------|-------------|-------------|-------------|------|-------------|-------------|-------------|
| C    | 0.00000000  | 0.00000000  | 0.00000000  | C    | -3.35681888 | -1.08332939 | -1.21379716 |
| H    | 0.00000000  | 0.00000000  | 1.09526210  | C    | -3.61177195 | -2.32077403 | -0.72862192 |
| H    | 1.02899631  | 0.00000000  | -0.36225780 | H    | -2.95504671 | -2.75082201 | 0.01983975  |
| C    | -0.85702190 | -1.13646353 | -0.58266107 | C    | -4.82282491 | -3.10940012 | -1.14523176 |
| H    | -0.99038974 | -1.92721011 | 0.15903753  | H    | -5.04259565 | -2.98170680 | -2.21407411 |
| N    | -2.12240573 | -0.42206300 | -0.80508951 | H    | -4.67538249 | -4.18138533 | -0.97146182 |
| C    | -1.91968504 | 0.92375563  | -0.80075752 | H    | -5.73231671 | -2.81971773 | -0.59542900 |
| O    | -0.64127993 | 1.20995803  | -0.45051122 | Li   | -5.72623165 | -0.34153080 | -2.89357968 |
| O    | -2.70781346 | 1.83520023  | -1.05740748 | O    | -7.36822503 | -0.71475098 | -3.69972598 |
| Li   | -4.24245239 | 1.46201826  | -2.05312492 | C    | -7.99209005 | 0.19636745  | -4.24600137 |
| O    | -4.09426731 | -0.40706552 | -2.05249161 | O    | -8.94825695 | -0.09045763 | -5.16381626 |

|   |              |             |              |
|---|--------------|-------------|--------------|
| C | -9.66310551  | 1.11950671  | -5.48501566  |
| H | -10.60352260 | 1.12074998  | -4.92357440  |
| H | -9.87953011  | 1.11826923  | -6.55423111  |
| C | -8.72287810  | 2.25598912  | -5.04923188  |
| H | -9.29094195  | 3.04765754  | -4.55552336  |
| N | -7.88372592  | 1.54232380  | -4.07577832  |
| C | -6.89960064  | 2.20410138  | -3.22625667  |
| C | -7.18490120  | 3.44223961  | -2.76009239  |
| C | -6.20600167  | 4.23159381  | -1.93498928  |
| H | -6.21316690  | 3.94464151  | -0.87151478  |
| H | -5.17552454  | 4.10149629  | -2.29301723  |
| H | -6.42923260  | 5.30380910  | -1.97542014  |
| H | -8.16404042  | 3.87245755  | -2.94072910  |
| O | -5.80174629  | 1.52756235  | -3.02236533  |
| C | -7.87984289  | 2.86530181  | -6.19291680  |
| H | -7.10255850  | 3.48038761  | -5.72607410  |
| H | -7.37526489  | 2.05105770  | -6.72733424  |
| C | -8.70829404  | 3.69366071  | -7.15009031  |
| C | -9.07423883  | 3.19994757  | -8.40949732  |
| C | -9.86543844  | 3.95785561  | -9.27555646  |
| C | -10.30441146 | 5.22554737  | -8.89309843  |
| C | -9.94335135  | 5.73210420  | -7.64221603  |
| C | -9.15238871  | 4.97251895  | -6.78088857  |
| H | -8.86460102  | 5.37893651  | -5.81336935  |
| H | -10.27311345 | 6.72259855  | -7.33979868  |
| H | -10.91820132 | 5.81801641  | -9.56611471  |
| H | -10.13360222 | 3.55828069  | -10.25005974 |
| H | -8.72442926  | 2.21777006  | -8.72075632  |
| C | -0.30750261  | -1.74767696 | -1.89205730  |
| H | -1.10725555  | -2.36250920 | -2.31962675  |
| H | -0.10644914  | -0.93434971 | -2.60006329  |
| C | 0.93819097   | -2.57697949 | -1.67025618  |
| C | 0.84735688   | -3.85519280 | -1.09844242  |
| C | 1.99151981   | -4.61569103 | -0.85975316  |
| C | 3.25124710   | -4.11072547 | -1.19110610  |
| C | 3.35607269   | -2.84371560 | -1.76529415  |
| C | 2.20770439   | -2.08487113 | -2.00176411  |
| H | 2.29675007   | -1.10324597 | -2.46263370  |
| H | 4.33074749   | -2.44540930 | -2.03471126  |
| H | 4.14308647   | -4.70393532 | -1.00824888  |
| H | 1.89981034   | -5.60566691 | -0.42064307  |
| H | -0.13140620  | -4.26032064 | -0.84948387  |

**Table 26.** Geometric coordinates and thermally corrected MP2 energies for 5 dimer with one THF *cis* to the benzyl groups

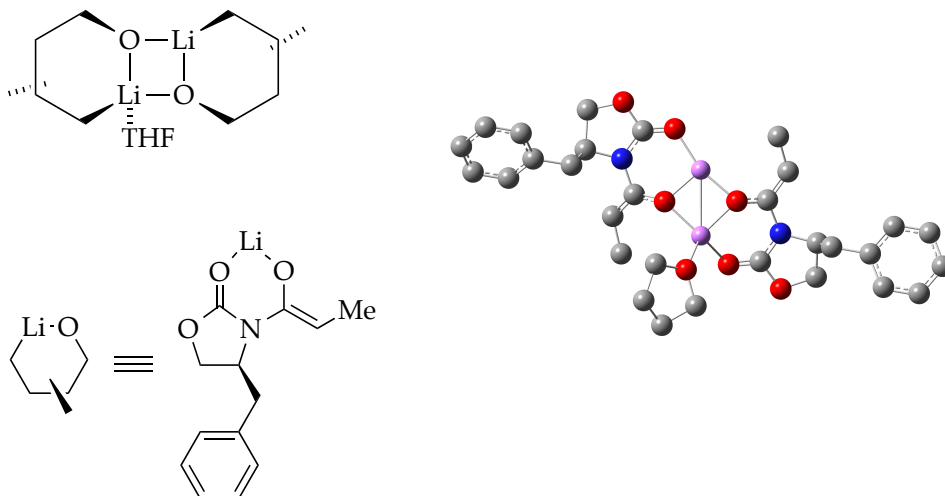

G = -1815.672391 Hartree

G<sub>MP2</sub> = -1135764.368 kcal/mol

ΔG<sub>MP2</sub> = 7.035258123 kcal/mol Li vs. 5 spirocyclic dimer with three THF

| Atom | X           | Y           | Z           | Atom | X           | Y           | Z           |
|------|-------------|-------------|-------------|------|-------------|-------------|-------------|
| Li   | 0.00000000  | 0.00000000  | 0.00000000  | H    | -1.94021121 | -4.80306340 | -4.80782931 |
| O    | 0.00000000  | 0.00000000  | 1.93357650  | H    | -1.64265338 | -3.64059808 | -6.12792758 |
| C    | 1.06785916  | 0.00000000  | 2.54046381  | C    | -2.31683438 | -2.71344770 | -4.23508366 |
| O    | 1.14031622  | 0.53620196  | 3.79081529  | H    | -3.27122891 | -3.09822764 | -3.86895147 |
| C    | 2.42558891  | 0.22036312  | 4.35780345  | N    | -1.37220089 | -2.53604257 | -3.12362161 |
| H    | 2.30548888  | -0.63783752 | 5.02822747  | C    | -1.65677676 | -1.71893832 | -1.93939904 |
| H    | 2.77155605  | 1.08157984  | 4.93179048  | C    | -2.94190761 | -1.68101848 | -1.50636626 |
| C    | 3.31421656  | -0.10942316 | 3.14774756  | C    | -3.39632374 | -0.86324091 | -0.33045646 |
| H    | 3.94864024  | -0.97025231 | 3.37054089  | H    | -2.67008705 | -0.08304153 | -0.08072016 |
| N    | 2.28897827  | -0.46772259 | 2.15853178  | H    | -4.35844492 | -0.37099204 | -0.53055524 |
| C    | 2.59731490  | -1.04014127 | 0.85273322  | H    | -3.53707388 | -1.47155850 | 0.57610127  |
| C    | 3.68615760  | -1.84296096 | 0.75315556  | H    | -3.68002492 | -2.32022835 | -1.97991279 |
| H    | 4.23255187  | -2.12494474 | 1.64662496  | O    | -0.63002636 | -1.08903169 | -1.44845058 |
| C    | 4.15058521  | -2.41053853 | -0.56014145 | C    | -2.55683278 | -1.39032428 | -4.99861332 |
| H    | 3.91074172  | -1.73556956 | -1.39204520 | H    | -2.85466827 | -0.64292483 | -4.25480078 |
| H    | 5.23760599  | -2.55936222 | -0.56503716 | H    | -1.60540748 | -1.06012451 | -5.43340488 |
| H    | 3.70031031  | -3.38805008 | -0.79689748 | C    | -3.61370293 | -1.51766583 | -6.07330490 |
| O    | 1.79646928  | -0.68804849 | -0.11335938 | C    | -3.26776199 | -1.59083764 | -7.42922989 |
| Li   | 1.10694096  | -1.73254946 | -1.46555739 | C    | -4.24777352 | -1.73754047 | -8.41347166 |
| O    | 0.90886146  | -3.00199231 | -2.82629674 | C    | -5.59366635 | -1.81474761 | -8.05463805 |
| C    | -0.15322447 | -3.04833595 | -3.44715221 | C    | -5.95328681 | -1.73981841 | -6.70678578 |
| O    | -0.20947102 | -3.68910609 | -4.64356418 | C    | -4.97178875 | -1.59191555 | -5.72742046 |
| C    | -1.58709118 | -3.79456134 | -5.04916143 | H    | -5.26039395 | -1.52274413 | -4.68049452 |

|   |             |             |             |   |             |             |             |
|---|-------------|-------------|-------------|---|-------------|-------------|-------------|
| H | -7.00007050 | -1.79090077 | -6.41868628 | H | 8.37211135  | 0.15413608  | 4.56286109  |
| H | -6.35800249 | -1.92719778 | -8.81877522 | H | 6.52318344  | -0.31160126 | 2.98717438  |
| H | -3.95812825 | -1.78735647 | -9.45984238 | O | -0.55971357 | 1.86686424  | -0.42078710 |
| H | -2.22113523 | -1.51973219 | -7.71796871 | C | -1.15429262 | 2.22995678  | -1.69035909 |
| C | 4.19353608  | 1.06420232  | 2.65746942  | C | -1.98617267 | 3.50109617  | -1.43064307 |
| H | 4.57820872  | 0.78358517  | 1.67081469  | C | -2.15705416 | 3.50237350  | 0.09914170  |
| H | 3.55461664  | 1.94552024  | 2.52101682  | C | -0.83787199 | 2.88609277  | 0.55625149  |
| C | 5.33287326  | 1.37873112  | 3.60113176  | H | -0.87227039 | 2.39704207  | 1.53142524  |
| C | 6.46064892  | 0.54520906  | 3.65501910  | H | -0.02743076 | 3.63059247  | 0.55406202  |
| C | 7.50506968  | 0.80919851  | 4.54040638  | H | -2.99301540 | 2.85930396  | 0.39708774  |
| C | 7.44171454  | 1.91615595  | 5.39030279  | H | -2.32606012 | 4.50142268  | 0.51245939  |
| C | 6.32873228  | 2.75599552  | 5.34469340  | H | -2.93894089 | 3.48734944  | -1.96795129 |
| C | 5.28440628  | 2.48714819  | 4.45720848  | H | -1.43593546 | 4.39348528  | -1.74999175 |
| H | 4.42612310  | 3.15487816  | 4.41855087  | H | -0.35580594 | 2.39161281  | -2.42293611 |
| H | 6.27305520  | 3.62422601  | 5.99620593  | H | -1.76062957 | 1.38109826  | -2.01729331 |
| H | 8.25660933  | 2.12447338  | 6.07831447  |   |             |             |             |

**Table 27.** Geometric coordinates and thermally corrected MP2 energies for 5 dimer with one THF *trans* to the benzyl groups

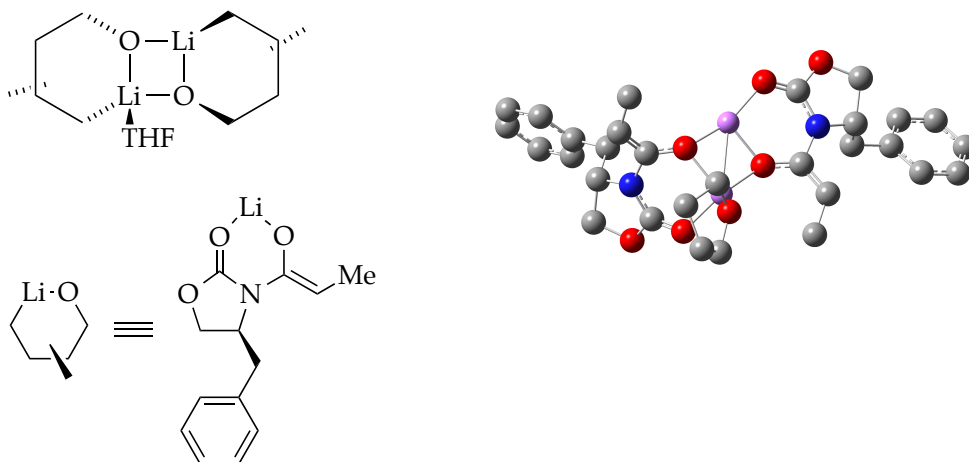

G = -1815.672721 Hartree

G<sub>MP2</sub> = -1135764.755 kcal/mol

ΔG<sub>MP2</sub> = 6.841829302 kcal/mol Li vs. 5 spirocyclic dimer with three THF

| Atom | X           | Y           | Z           | Atom | X           | Y           | Z           |
|------|-------------|-------------|-------------|------|-------------|-------------|-------------|
| Li   | 0.00000000  | 0.00000000  | 0.00000000  | H    | -4.53586973 | 0.67139525  | -2.61273510 |
| O    | 0.00000000  | 0.00000000  | 1.90896360  | C    | -4.85321076 | 1.33673694  | -0.57275298 |
| C    | 0.81665696  | 0.00000000  | 2.92153925  | H    | -4.93037094 | 0.32521016  | -0.15744890 |
| N    | 0.24137884  | -0.46162947 | 4.18797770  | H    | -4.31689468 | 1.95060194  | 0.16114646  |
| C    | 0.71374889  | 0.00062137  | 5.50238950  | C    | -6.23060855 | 1.90500969  | -0.83406205 |
| C    | -0.05279430 | -0.95875597 | 6.42452782  | C    | -6.54285143 | 3.23093000  | -0.50491493 |
| H    | 0.53784533  | -1.84388041 | 6.68546541  | C    | -7.80585027 | 3.76050080  | -0.77815660 |
| H    | -0.42153353 | -0.48692321 | 7.33653694  | C    | -8.77957479 | 2.96863488  | -1.38724598 |
| O    | -1.18365255 | -1.38423315 | 5.64137087  | C    | -8.48376995 | 1.64369652  | -1.71654584 |
| C    | -0.90719070 | -1.17986241 | 4.32716715  | C    | -7.22156170 | 1.11855066  | -1.44112596 |
| O    | -1.66927019 | -1.63097595 | 3.47020022  | H    | -7.00302735 | 0.08187565  | -1.68957013 |
| Li   | -1.54650884 | -0.98744546 | 1.72773394  | H    | -9.23921978 | 1.01657534  | -2.18278949 |
| O    | -1.74602642 | -0.89550125 | -0.07519385 | H    | -9.76394453 | 3.37751072  | -1.59848970 |
| C    | -2.53012957 | -0.75622224 | -1.10917821 | H    | -8.02877168 | 4.78985557  | -0.50978732 |
| N    | -2.68736358 | 0.61949465  | -1.58390494 | H    | -5.79330100 | 3.85080943  | -0.01740325 |
| C    | -3.99104066 | 1.23812725  | -1.85352457 | C    | -3.22275476 | -1.71629292 | -1.76562525 |
| C    | -3.53144105 | 2.59357554  | -2.41772005 | C    | -3.24674804 | -3.15729974 | -1.34387201 |
| H    | -3.47005623 | 2.58409103  | -3.51168333 | H    | -4.27103172 | -3.51845937 | -1.17116698 |
| H    | -4.14968632 | 3.43339224  | -2.09718433 | H    | -2.80837627 | -3.81941186 | -2.10541936 |
| O    | -2.20298511 | 2.77766871  | -1.89061538 | H    | -2.68217764 | -3.29925302 | -0.41716773 |
| C    | -1.71145093 | 1.56639763  | -1.51373904 | H    | -3.78890410 | -1.43803258 | -2.65036041 |
| O    | -0.53507843 | 1.44250802  | -1.18381423 | H    | 1.78896077  | -0.16280062 | 5.60023872  |

|   |             |             |             |
|---|-------------|-------------|-------------|
| C | 0.39242251  | 1.49607210  | 5.73066529  |
| H | 0.79318912  | 2.04438810  | 4.87133951  |
| H | -0.69718358 | 1.62297035  | 5.72151594  |
| C | 0.97509924  | 2.02941430  | 7.02058910  |
| C | 2.35048381  | 2.28874831  | 7.12365871  |
| C | 2.90462969  | 2.75412644  | 8.31553540  |
| C | 2.09058383  | 2.97109008  | 9.42994711  |
| C | 0.72083833  | 2.72219126  | 9.34071068  |
| C | 0.17012169  | 2.25494803  | 8.14527469  |
| H | -0.90123472 | 2.07630485  | 8.08002435  |
| H | 0.07756023  | 2.89537354  | 10.19952317 |
| H | 2.52083115  | 3.33682151  | 10.35836003 |
| H | 3.97150977  | 2.95374214  | 8.37305955  |
| H | 2.98884305  | 2.13535388  | 6.25588457  |
| C | 2.10873114  | 0.41155445  | 2.92821340  |
| H | 2.70805435  | 0.30058527  | 3.82472766  |
| C | 2.77791178  | 0.98362104  | 1.70929623  |
| H | 2.06391037  | 1.53708115  | 1.08647050  |
| H | 3.57704567  | 1.68083790  | 1.99037881  |
| H | 3.23412778  | 0.21323194  | 1.06831542  |
| O | 1.37107339  | -1.03521314 | -1.00907529 |
| C | 2.09473682  | -0.43428125 | -2.11187503 |
| C | 2.26963215  | -1.54111709 | -3.16189989 |
| C | 1.10791815  | -2.49600810 | -2.84136235 |
| C | 1.04657300  | -2.40888151 | -1.31806191 |
| H | 1.78783072  | -3.06833425 | -0.84512824 |
| H | 0.05895882  | -2.61097051 | -0.89799228 |
| H | 1.27597246  | -3.51644612 | -3.19913604 |
| H | 0.17083692  | -2.12778631 | -3.27430092 |
| H | 3.22938072  | -2.05340257 | -3.02624118 |
| H | 2.23913294  | -1.14983133 | -4.18321202 |
| H | 1.49573543  | 0.40307725  | -2.48423052 |
| H | 3.04620046  | -0.04678309 | -1.73322537 |



**Table 28.** Geometric coordinates and thermally corrected MP2 energies for 5 dimer trans solvated with two THF

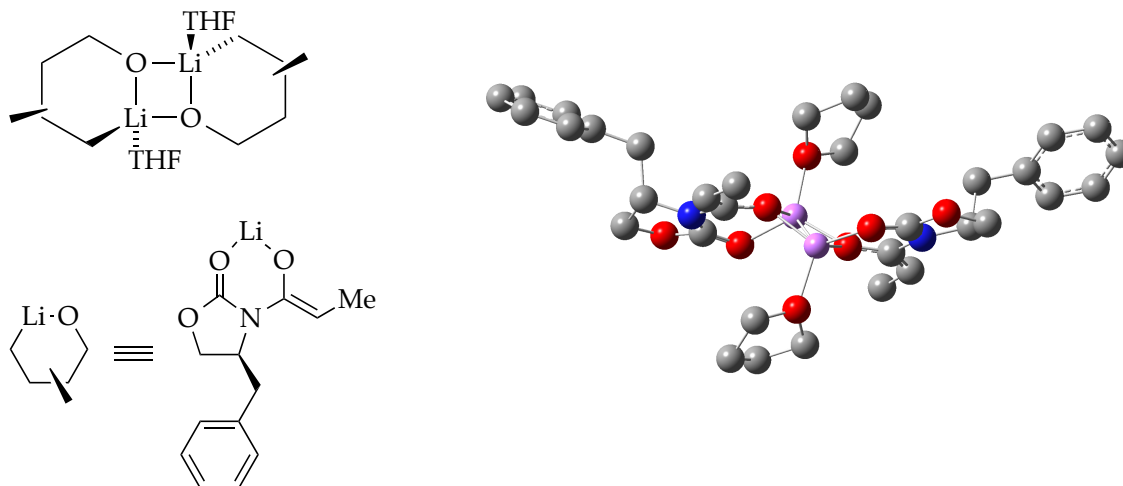

G = - 2048.024941 Hartree

G<sub>MP2</sub> = - 1281086.884 kcal/mol

ΔG<sub>MP2</sub> = 1.922583795 kcal/mol Li vs. 5 spirocyclic dimer with three THF

| Atom | X           | Y           | Z           | Atom | X           | Y           | Z           |
|------|-------------|-------------|-------------|------|-------------|-------------|-------------|
| Li   | 0.00000000  | 0.00000000  | 0.00000000  | O    | -0.36484468 | -2.59957887 | -4.95850904 |
| O    | 0.00000000  | 0.00000000  | 1.93578920  | C    | -1.65780678 | -2.33987376 | -5.52823069 |
| C    | 1.08678450  | 0.00000000  | 2.50476227  | H    | -2.20476629 | -3.28721778 | -5.59678719 |
| O    | 1.20230383  | 0.54929065  | 3.74732190  | H    | -1.52054692 | -1.92913305 | -6.52986341 |
| C    | 2.50484656  | 0.24290609  | 4.27363638  | C    | -2.32005730 | -1.36042042 | -4.54857758 |
| H    | 2.41296575  | -0.61313565 | 4.95198378  | H    | -3.37587456 | -1.61039517 | -4.42082399 |
| H    | 2.86606427  | 1.10831307  | 4.83156527  | N    | -1.56880282 | -1.66066167 | -3.32287020 |
| C    | 3.35201800  | -0.08743253 | 3.03642258  | C    | -1.94700378 | -1.17025654 | -1.99577312 |
| H    | 4.01243076  | -0.93147893 | 3.24725131  | C    | -3.23672387 | -0.78393388 | -1.80311470 |
| N    | 2.29804087  | -0.48165960 | 2.09179088  | C    | -3.74838035 | -0.27728512 | -0.48351928 |
| C    | 2.56319996  | -1.12117928 | 0.80163657  | H    | -2.95214490 | -0.26584082 | 0.26698436  |
| C    | 3.74355776  | -1.78089211 | 0.65112989  | H    | -4.15703963 | 0.74260583  | -0.55313244 |
| H    | 4.42114941  | -1.88310167 | 1.49163814  | H    | -4.56044882 | -0.90733937 | -0.09058129 |
| C    | 4.16287121  | -2.39636826 | -0.65524289 | H    | -3.95891109 | -0.88600337 | -2.60566379 |
| H    | 3.54772505  | -2.01891121 | -1.47842416 | O    | -0.98706136 | -1.15122243 | -1.12187341 |
| H    | 5.21217164  | -2.16764481 | -0.88855356 | C    | -2.18481566 | 0.12617879  | -4.95723288 |
| H    | 4.07634693  | -3.49480511 | -0.66202073 | H    | -2.46932801 | 0.72559796  | -4.08558015 |
| O    | 1.63530001  | -0.97411660 | -0.09505670 | H    | -1.12732624 | 0.33054867  | -5.16665986 |
| Li   | 0.56086988  | -2.26621111 | -1.02058606 | C    | -3.03801190 | 0.49114963  | -6.15168946 |
| O    | 0.52539969  | -2.65270600 | -2.90362557 | C    | -2.47441019 | 0.66462120  | -7.42297910 |
| C    | -0.40554532 | -2.31620407 | -3.62459511 | C    | -3.27228228 | 0.97338753  | -8.52684673 |

|   |             |             |             |   |             |             |             |
|---|-------------|-------------|-------------|---|-------------|-------------|-------------|
| C | -4.65201188 | 1.11333297  | -8.37558089 | C | 5.35277074  | 1.45253861  | 3.39407166  |
| C | -5.22727953 | 0.94678224  | -7.11348430 | C | 6.49994693  | 0.64442482  | 3.41523745  |
| C | -4.42675284 | 0.63963121  | -6.01381177 | C | 7.57019095  | 0.94143702  | 4.25837969  |
| H | -4.88172863 | 0.52278377  | -5.03222315 | C | 7.51384381  | 2.05698838  | 5.09747678  |
| H | -6.30039164 | 1.06165412  | -6.98455166 | C | 6.38212930  | 2.87250306  | 5.08320352  |
| H | -5.27475672 | 1.35520278  | -9.23258618 | C | 5.31205159  | 2.57062921  | 4.23804063  |
| H | -2.81370420 | 1.10780128  | -9.50304123 | H | 4.43803341  | 3.21854003  | 4.22349228  |
| H | -1.39779031 | 0.56813770  | -7.54731179 | H | 6.33151429  | 3.74723357  | 5.72636282  |
| O | 0.15761249  | -3.89248321 | 0.07468157  | H | 8.34863637  | 2.29087789  | 5.75264543  |
| C | 1.10903767  | -4.56145187 | 0.93551575  | H | 8.45166313  | 0.30549861  | 4.25627186  |
| H | 1.38860488  | -5.51958183 | 0.48094080  | H | 6.55686248  | -0.21878660 | 2.75517166  |
| H | 1.99466161  | -3.92245936 | 0.99448941  | O | 0.22538789  | 1.85375082  | -0.71656613 |
| C | 0.41074953  | -4.74931100 | 2.30195498  | C | 1.40603272  | 2.05756213  | -1.52543431 |
| H | 0.14261046  | -5.80056819 | 2.45569555  | H | 2.00408817  | 2.87125706  | -1.09022145 |
| H | 1.05199318  | -4.44698447 | 3.13527221  | H | 1.98112859  | 1.12973345  | -1.49416496 |
| C | -0.85803979 | -3.88229209 | 2.18309954  | C | 0.87578380  | 2.43656240  | -2.90558100 |
| C | -1.14556781 | -3.94668562 | 0.68590853  | C | -0.36082055 | 3.27610814  | -2.54466394 |
| H | -1.71506980 | -3.10161511 | 0.29591106  | C | -0.89904299 | 2.56363857  | -1.29394317 |
| H | -1.64353343 | -4.88845831 | 0.40907479  | H | -1.67036999 | 1.82533659  | -1.53956049 |
| H | -1.68793238 | -4.25454653 | 2.79194999  | H | -1.29674132 | 3.25618514  | -0.54468085 |
| H | -0.65595798 | -2.84496371 | 2.47071216  | H | -1.10347315 | 3.32040216  | -3.34694748 |
| C | 4.18477452  | 1.10129545  | 2.49962854  | H | -0.06310816 | 4.30366778  | -2.30538331 |
| H | 4.53527615  | 0.81984970  | 1.50080244  | H | 1.60987981  | 2.98345069  | -3.50521363 |
| H | 3.51917185  | 1.96551400  | 2.38244968  | H | 0.58394021  | 1.53424309  | -3.45506000 |

**Table 29.** Geometric coordinates and thermally corrected MP2 energies for 5 dimer cis solvated with two THF

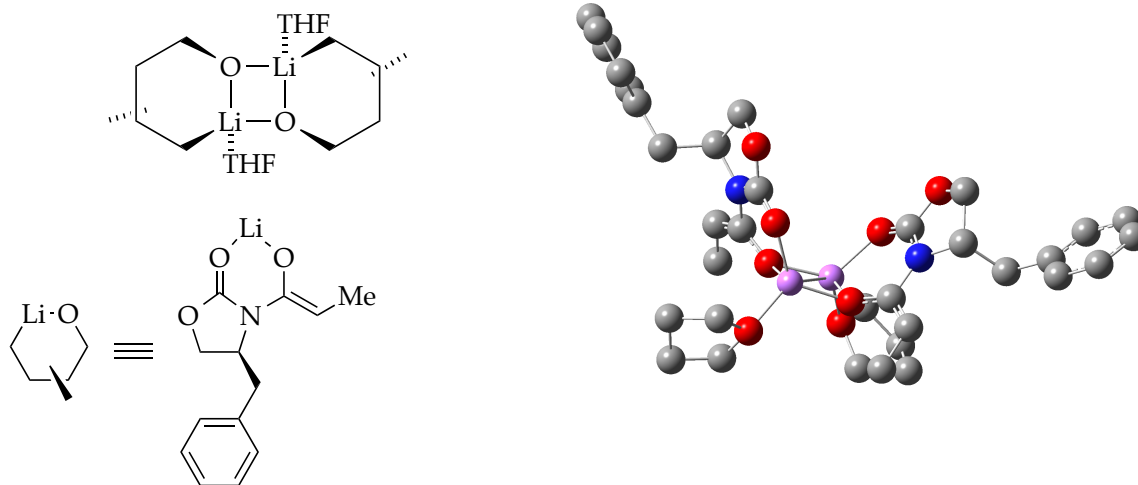

G = - 2048.024728 Hartree

G<sub>MP2</sub> = - 1281084.394 kcal/mol

ΔG<sub>MP2</sub> = 3.167104249 kcal/mol Li vs. 5 spirocyclic dimer with three THF

| Atom | X           | Y           | Z           | Atom | X           | Y           | Z           |
|------|-------------|-------------|-------------|------|-------------|-------------|-------------|
| Li   | 0.00000000  | 0.00000000  | 0.00000000  | C    | -1.04815982 | -3.36700301 | -4.06778651 |
| O    | 0.00000000  | 0.00000000  | 1.90200070  | H    | -1.99043607 | -2.81314426 | -4.00861762 |
| C    | 0.99187449  | 0.00000000  | 2.74386037  | H    | -0.29097343 | -2.67180236 | -4.45138401 |
| N    | 1.34693117  | -1.31838930 | 3.27071766  | C    | -1.18398256 | -4.55308462 | -4.99775901 |
| C    | 2.53776229  | -1.59367919 | 4.08486436  | C    | -0.21032866 | -4.83014535 | -5.96691458 |
| C    | 2.69164624  | -3.09655581 | 3.82874163  | C    | -0.32635474 | -5.94011683 | -6.80653679 |
| H    | 3.31699491  | -3.30600885 | 2.95344676  | C    | -1.42254667 | -6.79474542 | -6.68865263 |
| H    | 3.06491054  | -3.65388994 | 4.68918100  | C    | -2.40249926 | -6.52976166 | -5.72902572 |
| O    | 1.34822199  | -3.53626822 | 3.54966789  | C    | -2.28311530 | -5.41953874 | -4.89372581 |
| C    | 0.62787231  | -2.46752176 | 3.10090252  | H    | -3.05733099 | -5.21662941 | -4.15650405 |
| O    | -0.50394777 | -2.64110264 | 2.65842568  | H    | -3.26374296 | -7.18600271 | -5.63424626 |
| Li   | -1.42706792 | -1.23867134 | 1.70945960  | H    | -1.51621787 | -7.65817385 | -7.34176312 |
| O    | -1.52405631 | -1.12494563 | -0.18314050 | H    | 0.43855585  | -6.13322318 | -7.55421105 |
| C    | -1.78526632 | -2.04734377 | -1.06134669 | H    | 0.64235196  | -4.16252977 | -6.07228445 |
| N    | -0.60890459 | -2.61834602 | -1.71840540 | C    | -3.00995132 | -2.53352211 | -1.39309563 |
| C    | -0.64354215 | -3.77195237 | -2.62680855 | C    | -4.27424996 | -2.04444339 | -0.74439239 |
| C    | 0.81316854  | -4.23597934 | -2.52262135 | H    | -4.96729061 | -1.59350414 | -1.47168281 |
| H    | 0.96062995  | -4.96064195 | -1.71377919 | H    | -4.82832412 | -2.85924449 | -0.25381951 |
| H    | 1.21463412  | -4.63815507 | -3.45393256 | H    | -4.05032893 | -1.28976655 | 0.01514627  |
| O    | 1.53487497  | -3.03220780 | -2.19833358 | H    | -3.10807312 | -3.31010324 | -2.14251351 |
| C    | 0.67181915  | -2.15567793 | -1.60797430 | O    | -3.03777167 | -0.74890728 | 2.78748456  |
| O    | 1.10588051  | -1.12072148 | -1.11031076 | C    | -3.66888061 | -1.74321119 | 3.63153705  |
| H    | -1.33092017 | -4.52621690 | -2.23689950 | C    | -3.92815669 | -1.06002938 | 4.98561563  |

|   |             |             |            |   |             |            |             |
|---|-------------|-------------|------------|---|-------------|------------|-------------|
| C | -2.93084683 | 0.11078871  | 4.97476651 | C | 1.72341216  | 1.07280222 | 3.14274125  |
| C | -2.92939917 | 0.50267020  | 3.49945661 | H | 2.52875001  | 0.95078396 | 3.85755795  |
| H | -2.01145401 | 0.98643481  | 3.15872288 | C | 1.47521831  | 2.46028290 | 2.62160036  |
| H | -3.79344524 | 1.13644238  | 3.25204624 | H | 0.70788367  | 2.44894715 | 1.84227639  |
| H | -1.93177364 | -0.22781263 | 5.27217767 | H | 1.14057567  | 3.15001355 | 3.41252511  |
| H | -3.22536721 | 0.93432520  | 5.63255993 | H | 2.38411398  | 2.90326313 | 2.18824475  |
| H | -3.78231998 | -1.74365712 | 5.82724878 | O | -0.21242423 | 1.75245228 | -0.93129671 |
| H | -4.95555197 | -0.68093991 | 5.03562593 | C | -1.59711635 | 2.15025839 | -1.11365706 |
| H | -4.58811391 | -2.08541557 | 3.14432758 | C | -1.72589728 | 2.61563483 | -2.57555827 |
| H | -2.97711744 | -2.58759160 | 3.71663425 | C | -0.50240284 | 1.97466914 | -3.25319681 |
| H | 3.38850942  | -1.03176473 | 3.69260681 | C | 0.53369890  | 2.02413399 | -2.13292031 |
| C | 2.31180689  | -1.25632124 | 5.58146606 | H | 0.99810320  | 3.01832408 | -2.05879654 |
| H | 1.94649500  | -0.22633495 | 5.64235538 | H | 1.31634829  | 1.26589078 | -2.20854862 |
| H | 1.51048017  | -1.90359642 | 5.95927546 | H | -0.18062054 | 2.50667463 | -4.15393252 |
| C | 3.55953311  | -1.42923542 | 6.42004300 | H | -0.71184049 | 0.93308191 | -3.52258910 |
| C | 4.60925261  | -0.50143471 | 6.33633306 | H | -1.66493478 | 3.70815110 | -2.64056151 |
| C | 5.77370014  | -0.66664405 | 7.08547635 | H | -2.67445676 | 2.30576635 | -3.02357111 |
| C | 5.91055499  | -1.76577044 | 7.93671882 | H | -2.21222273 | 1.27285443 | -0.89316831 |
| C | 4.87391790  | -2.69417265 | 8.03345370 | H | -1.83077959 | 2.94418513 | -0.39597240 |
| C | 3.70992743  | -2.52521752 | 7.28040767 |   |             |            |             |
| H | 2.90154768  | -3.24800134 | 7.36996157 |   |             |            |             |
| H | 4.96720590  | -3.54937434 | 8.69778001 |   |             |            |             |
| H | 6.81651893  | -1.89384097 | 8.52294687 |   |             |            |             |
| H | 6.57305024  | 0.06581340  | 7.00859176 |   |             |            |             |
| H | 4.50886152  | 0.36366354  | 5.68394238 |   |             |            |             |

**Table 30.** Geometric coordinates and thermally corrected MP2 energies for 5 dimer unsymmetrically solvated with two THF

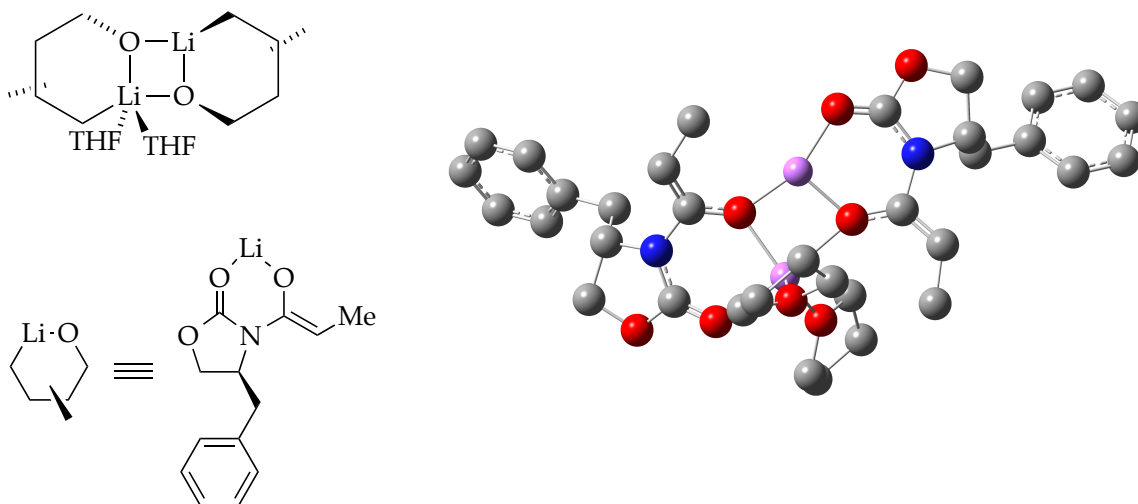

G = -2048.015294 Hartree

$G_{\text{MP2}} = -1281081.588$  kcal/mol

$\Delta G_{\text{MP2}} = 4.570565321$  kcal/mol Li vs. 5 spirocyclic dimer with three THF

| Atom | X           | Y           | Z           | Atom | X           | Y           | Z           |
|------|-------------|-------------|-------------|------|-------------|-------------|-------------|
| Li   | 0.00000000  | 0.00000000  | 0.00000000  | H    | -4.47959596 | -0.01309133 | -3.06636142 |
| O    | 0.00000000  | 0.00000000  | 2.22537890  | C    | -4.36746300 | 1.94692962  | -2.14734873 |
| C    | 0.64493755  | 0.00000000  | 3.34809936  | H    | -4.68223003 | 1.61117865  | -1.15273920 |
| N    | -0.19194029 | 0.09417793  | 4.56135318  | H    | -3.60478437 | 2.72206735  | -2.00380412 |
| C    | 0.26747311  | 0.69499075  | 5.82331098  | C    | -5.54741936 | 2.49790742  | -2.91648702 |
| C    | -0.88425383 | 0.29757094  | 6.75819034  | C    | -5.44639181 | 3.68436776  | -3.65530391 |
| H    | -0.67593053 | -0.63176827 | 7.30008399  | C    | -6.53173716 | 4.16908462  | -4.38858735 |
| H    | -1.15803700 | 1.07791841  | 7.47013805  | C    | -7.73945067 | 3.47092936  | -4.39500888 |
| O    | -1.99975958 | 0.06956666  | 5.87885369  | C    | -7.85591239 | 2.28876482  | -3.65975136 |
| C    | -1.52770118 | -0.16327467 | 4.62487819  | C    | -6.77023553 | 1.80927004  | -2.92786767 |
| O    | -2.30178717 | -0.54920072 | 3.74894905  | H    | -6.87262788 | 0.89447409  | -2.34749660 |
| Li   | -1.77561316 | -0.34198191 | 1.96818121  | H    | -8.79579133 | 1.74285872  | -3.65153736 |
| O    | -1.97146768 | -0.12078010 | 0.17699740  | H    | -8.58595801 | 3.84691740  | -4.96326537 |
| C    | -2.84751123 | -0.44821569 | -0.72850055 | H    | -6.43300178 | 5.09410394  | -4.95074275 |
| N    | -2.63826976 | 0.14817508  | -2.04081012 | H    | -4.51146635 | 4.24092984  | -3.64609348 |
| C    | -3.71171374 | 0.73406762  | -2.84871033 | C    | -3.93229051 | -1.24415057 | -0.56311205 |
| C    | -2.92800746 | 1.08402435  | -4.12690999 | C    | -4.28131941 | -1.84291063 | 0.77303748  |
| H    | -3.01122363 | 0.29922202  | -4.88720801 | H    | -5.22448373 | -2.39728013 | 0.72127737  |
| H    | -3.21594802 | 2.04130892  | -4.56476010 | H    | -3.51650575 | -2.54841220 | 1.13576730  |
| O    | -1.55334645 | 1.16687873  | -3.70723773 | H    | -4.40108752 | -1.08185498 | 1.55915721  |
| C    | -1.41390058 | 0.49271753  | -2.52703385 | H    | -4.55744238 | -1.48163642 | -1.41743698 |
| O    | -0.30692146 | 0.26599332  | -2.05841647 | H    | 1.19671848  | 0.22763831  | 6.15504420  |

|   |             |             |             |
|---|-------------|-------------|-------------|
| C | 0.47712085  | 2.22130528  | 5.68726925  |
| H | 1.14343503  | 2.37606361  | 4.83177589  |
| H | -0.48630568 | 2.68492668  | 5.44161072  |
| C | 1.06189210  | 2.84834562  | 6.93338477  |
| C | 2.41336255  | 2.65409625  | 7.25809969  |
| C | 2.95805542  | 3.20437810  | 8.41771328  |
| C | 2.15916743  | 3.96367084  | 9.27625311  |
| C | 0.81527757  | 4.16925056  | 8.96372242  |
| C | 0.27332419  | 3.61479981  | 7.80202919  |
| H | -0.77289859 | 3.78964419  | 7.55964208  |
| H | 0.18688871  | 4.76453078  | 9.62109059  |
| H | 2.58339391  | 4.39565993  | 10.17859986 |
| H | 4.00826475  | 3.04584330  | 8.64869036  |
| H | 3.04552362  | 2.07519284  | 6.58776169  |
| C | 1.99053276  | -0.05349894 | 3.54830293  |
| H | 2.37344179  | -0.11620824 | 4.56123309  |
| C | 3.00656463  | -0.08785639 | 2.44120402  |
| H | 2.54771764  | 0.13694825  | 1.47503161  |
| H | 3.80797720  | 0.64693528  | 2.60994552  |
| H | 3.50334915  | -1.06718109 | 2.35599308  |
| O | 0.78800255  | -1.89219978 | -0.27612789 |
| C | 1.20700077  | -2.73826835 | 0.81646208  |
| C | 0.49554640  | -4.07038161 | 0.58940786  |
| C | 0.50547438  | -4.16383135 | -0.94416388 |
| C | 0.27677863  | -2.70543289 | -1.36063460 |
| H | -0.78847957 | -2.48192749 | -1.48058801 |
| H | 0.79752703  | -2.42652071 | -2.28097341 |
| H | -0.26082326 | -4.83403103 | -1.34573129 |
| H | 1.48227174  | -4.51853654 | -1.29479660 |
| H | -0.53404277 | -4.02199525 | 0.96433112  |
| H | 1.00061891  | -4.90802433 | 1.08055537  |
| H | 2.29870186  | -2.86196332 | 0.77646111  |
| H | 0.94191070  | -2.22963726 | 1.74358814  |
| O | 1.22964021  | 1.65762614  | -0.01398323 |
| C | 1.10184933  | 2.72472878  | 0.95376961  |
| C | 2.00148244  | 3.86208334  | 0.45118996  |
| C | 2.04846602  | 3.60556069  | -1.06296658 |
| C | 2.06104817  | 2.07846735  | -1.11433411 |
| H | 3.07834082  | 1.68668882  | -0.96673455 |
| H | 1.63808750  | 1.65117780  | -2.02405920 |
| H | 2.91923940  | 4.05230202  | -1.55312048 |
| H | 1.14509430  | 3.99387533  | -1.54867972 |
| H | 3.00680764  | 3.77390566  | 0.88015480  |
| H | 1.60951742  | 4.84955031  | 0.71427227  |
| H | 0.04738290  | 3.02443256  | 0.99109229  |
| H | 1.38922488  | 2.34124997  | 1.93557275  |

**Table 31.** Geometric coordinates and thermally corrected MP2 energies for 5 dimer with three THF

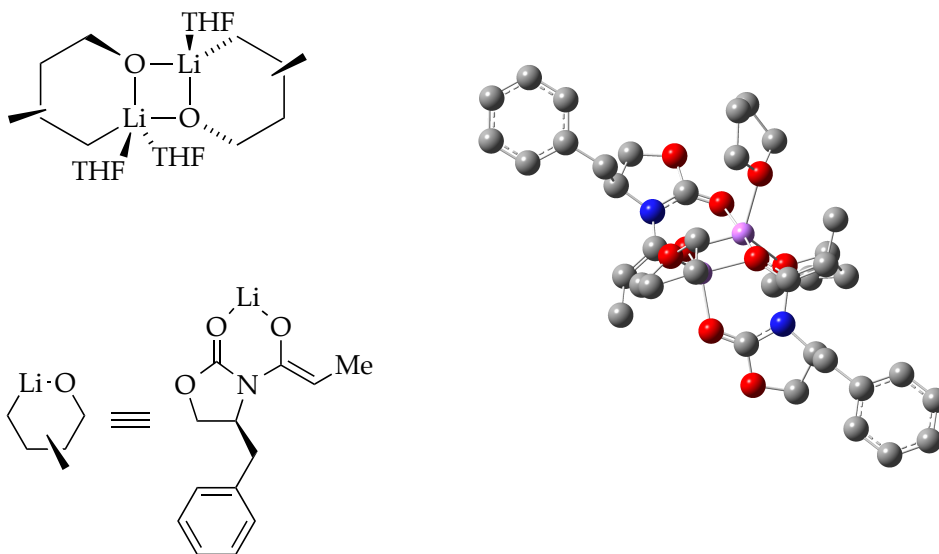

G = - 2280.364885 Hartree

G<sub>MP2</sub> = - 1426402.09 kcal/mol

ΔG<sub>MP2</sub> = 0.464733826 kcal/mol Li vs. 5 spirocyclic dimer with three THF

| Atom | X           | Y           | Z           | Atom | X           | Y           | Z           |
|------|-------------|-------------|-------------|------|-------------|-------------|-------------|
| Li   | 0.00000000  | 0.00000000  | 0.00000000  | H    | -4.01503670 | -1.91847151 | -3.09335609 |
| O    | 0.00000000  | 0.00000000  | 2.09165270  | C    | -4.63738511 | -0.24444646 | -1.86884380 |
| C    | 0.99342614  | 0.00000000  | 2.92031074  | H    | -4.65688413 | -0.80630148 | -0.92799016 |
| N    | 1.35790556  | -1.31744840 | 3.45956960  | H    | -4.26822896 | 0.76228810  | -1.63740089 |
| C    | 2.56016196  | -1.59371484 | 4.25589949  | C    | -6.02304792 | -0.17499475 | -2.47070542 |
| C    | 2.69389166  | -3.10082569 | 4.01566581  | C    | -6.52422398 | 1.01688896  | -3.01127189 |
| H    | 3.28970852  | -3.32774722 | 3.12388995  | C    | -7.79327332 | 1.06592495  | -3.59233283 |
| H    | 3.08959768  | -3.65072230 | 4.87091330  | C    | -8.58428306 | -0.08200330 | -3.64294606 |
| O    | 1.33842747  | -3.52980655 | 3.78567089  | C    | -8.09927586 | -1.27666425 | -3.10502875 |
| C    | 0.61810509  | -2.45833344 | 3.33951555  | C    | -6.83209370 | -1.32052062 | -2.52466066 |
| O    | -0.53172776 | -2.62126051 | 2.94395121  | H    | -6.46623006 | -2.25219015 | -2.09776763 |
| Li   | -1.40648311 | -1.23455606 | 1.90689905  | H    | -8.71140586 | -2.17448575 | -3.13269963 |
| O    | -1.51931076 | -1.21005511 | 0.04284567  | H    | -9.57282570 | -0.04630622 | -4.09284627 |
| C    | -2.10322095 | -1.87011204 | -0.91261454 | H    | -8.16372082 | 2.00248014  | -4.00121262 |
| N    | -2.31124588 | -1.10492024 | -2.14788611 | H    | -5.91847749 | 1.91974592  | -2.96570610 |
| C    | -3.61455113 | -0.94601960 | -2.79377029 | C    | -2.57268915 | -3.14171282 | -0.92038581 |
| C    | -3.20408559 | -0.12653378 | -4.03156278 | C    | -2.51463799 | -4.07748817 | 0.25310929  |
| H    | -3.02663598 | -0.76560011 | -4.90400252 | H    | -3.49784619 | -4.22365210 | 0.73022749  |
| H    | -3.92124598 | 0.65268466  | -4.29624722 | H    | -2.17053731 | -5.07515484 | -0.05321954 |
| O    | -1.96007706 | 0.49962652  | -3.66444034 | H    | -1.82373156 | -3.72053407 | 1.02269769  |
| C    | -1.41327035 | -0.20250651 | -2.61866675 | H    | -2.99976656 | -3.52264780 | -1.84452985 |
| O    | -0.27332877 | 0.01906335  | -2.23413517 | O    | -3.05684484 | -0.79601339 | 2.99063715  |

|   |             |             |            |   |             |             |             |
|---|-------------|-------------|------------|---|-------------|-------------|-------------|
| C | -3.73293446 | -1.88287944 | 3.67130715 | H | 0.88934411  | 2.44509583  | 1.90195053  |
| C | -3.99883526 | -1.39581749 | 5.10465580 | H | 0.95726403  | 3.08984048  | 3.55268320  |
| C | -2.93348887 | -0.30328514 | 5.29270751 | H | 2.42908239  | 2.98822003  | 2.59189110  |
| C | -2.87332658 | 0.31272248  | 3.89679561 | O | 1.95039740  | -0.53940289 | -0.30104156 |
| H | -1.91739946 | 0.77793082  | 3.64597446 | C | 3.01066083  | 0.43326776  | -0.18837346 |
| H | -3.68448258 | 1.04034412  | 3.74672057 | C | 4.23159562  | -0.21769199 | -0.84052911 |
| H | -1.96551540 | -0.74898021 | 5.54843321 | C | 3.58024837  | -1.06066299 | -1.94818025 |
| H | -3.19328189 | 0.42576568  | 6.06651105 | C | 2.30254031  | -1.55757141 | -1.26565303 |
| H | -3.92101197 | -2.20547658 | 5.83636819 | H | 2.47149455  | -2.49894500 | -0.72635721 |
| H | -5.00327860 | -0.96382360 | 5.18649221 | H | 1.45970583  | -1.67968865 | -1.94808768 |
| H | -4.65036860 | -2.12158338 | 3.12323247 | H | 4.21286758  | -1.88111916 | -2.30110089 |
| H | -3.06775763 | -2.75178563 | 3.64851321 | H | 3.33038284  | -0.42837161 | -2.80817736 |
| H | 3.40864007  | -1.04259418 | 3.84399633 | H | 4.75128748  | -0.86379840 | -0.12224776 |
| C | 2.36379984  | -1.24336279 | 5.75441647 | H | 4.94893926  | 0.51806875  | -1.21742955 |
| H | 2.00086572  | -0.21276789 | 5.81525278 | H | 2.71711376  | 1.34649492  | -0.72500813 |
| H | 1.56911011  | -1.88679566 | 6.15219384 | H | 3.13145610  | 0.67037836  | 0.87190492  |
| C | 3.62684159  | -1.41173845 | 6.57053396 | O | -0.43464958 | 2.06821086  | -0.12169904 |
| C | 4.67443452  | -0.48389166 | 6.46263395 | C | -1.68392735 | 2.44700904  | 0.50030975  |
| C | 5.85297833  | -0.64472326 | 7.19041397 | C | -2.13374394 | 3.73997457  | -0.19545659 |
| C | 6.00683617  | -1.73937737 | 8.04448791 | C | -1.43959934 | 3.64357360  | -1.56382563 |
| C | 4.97270022  | -2.66777565 | 8.16531966 | C | -0.11539018 | 2.97785463  | -1.19151905 |
| C | 3.79460207  | -2.50323371 | 7.43345004 | H | 0.61523850  | 3.71715369  | -0.83065384 |
| H | 2.98877931  | -3.22628726 | 7.54177627 | H | 0.32366584  | 2.39097183  | -1.99983444 |
| H | 5.07891459  | -3.51973402 | 8.83186893 | H | -1.30279422 | 4.61487808  | -2.04978348 |
| H | 6.92375559  | -1.86384556 | 8.61423792 | H | -2.00155405 | 2.99444720  | -2.24494312 |
| H | 6.65006320  | 0.08813656  | 7.09520311 | H | -1.77084626 | 4.61814051  | 0.35196101  |
| H | 4.56091358  | 0.37828175  | 5.80852951 | H | -3.22355182 | 3.81623910  | -0.26445268 |
| C | 1.74204533  | 1.06830151  | 3.31586929 | H | -2.39499499 | 1.62595679  | 0.35177415  |
| H | 2.53273475  | 0.94198701  | 4.04598933 | H | -1.51338682 | 2.56604152  | 1.57390323  |
| C | 1.48882385  | 2.46406972  | 2.81625263 |   |             |             |             |



**Table 32.** Geometric coordinates and thermally corrected MP2 energies for 5 spirocyclic dimer with no THF

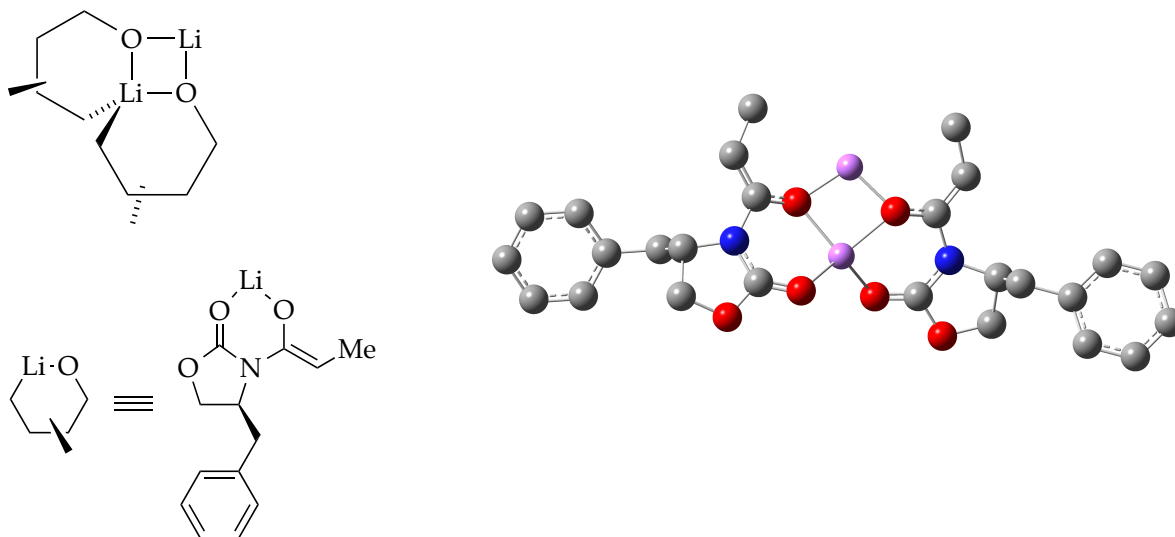

G = -1583.305352 Hartree

$G_{\text{MP2}} = -990435.4088$  kcal/mol

$\Delta G_{\text{MP2}} = 15.36966258$  kcal/mol Li vs. 5 spirocyclic dimer with three THF

| Atom | X           | Y           | Z           | Atom | X           | Y           | Z           |
|------|-------------|-------------|-------------|------|-------------|-------------|-------------|
| Li   | 0.00000000  | 0.00000000  | 0.00000000  | C    | -3.73147795 | 1.92380878  | -2.72442778 |
| O    | 0.00000000  | 0.00000000  | 1.92708970  | H    | -3.45904995 | 2.56678854  | -3.56853142 |
| C    | 1.04944315  | 0.00000000  | 2.55894929  | H    | -4.76550360 | 2.12233605  | -2.43812441 |
| O    | 1.11406590  | 0.56476070  | 3.79370448  | O    | -2.87936755 | 2.25174154  | -1.61172131 |
| C    | 2.38134588  | 0.24097393  | 4.39445023  | C    | -1.88238629 | 1.33150252  | -1.52815768 |
| H    | 2.22863714  | -0.58540015 | 5.09724962  | O    | -0.94175791 | 1.49876413  | -0.76148061 |
| H    | 2.73957410  | 1.11632827  | 4.93853580  | H    | -3.38627414 | 0.26964203  | -4.08984916 |
| C    | 3.28581298  | -0.15934871 | 3.21571544  | C    | -4.47900764 | -0.53958669 | -2.39813178 |
| H    | 3.88314255  | -1.03541517 | 3.48046287  | H    | -4.04637698 | -1.54435381 | -2.46254555 |
| N    | 2.27053562  | -0.51103240 | 2.21576393  | H    | -4.59397074 | -0.30217616 | -1.33355181 |
| C    | 2.57243187  | -1.14400142 | 0.94919550  | C    | -5.81924367 | -0.49529785 | -3.09841417 |
| C    | 3.61556208  | -2.00832709 | 0.88212467  | C    | -6.92185762 | 0.14745774  | -2.51985652 |
| H    | 4.15093798  | -2.28670640 | 1.78278751  | C    | -8.14833929 | 0.20748311  | -3.18522863 |
| C    | 4.04048615  | -2.64014956 | -0.41492612 | C    | -8.29077523 | -0.37583221 | -4.44440423 |
| H    | 3.88678961  | -1.95413791 | -1.26064324 | C    | -7.20086051 | -1.02303801 | -5.03165259 |
| H    | 5.10566874  | -2.90000235 | -0.40390143 | C    | -5.97854606 | -1.08176255 | -4.36327792 |
| H    | 3.50158787  | -3.57674757 | -0.64512859 | H    | -5.13793982 | -1.59940268 | -4.82120289 |
| O    | 1.80317809  | -0.79368288 | -0.04749626 | H    | -7.30511400 | -1.48804070 | -6.00854056 |
| Li   | 1.11586364  | -1.77063797 | -1.37843047 | H    | -9.24477801 | -0.33225780 | -4.96281143 |
| O    | -0.56555330 | -1.16952498 | -1.48146004 | H    | -8.99237869 | 0.70632829  | -2.71617617 |
| C    | -1.29469158 | -0.87735140 | -2.52589866 | H    | -6.82261805 | 0.59342601  | -1.53241074 |
| N    | -2.12899045 | 0.29785386  | -2.38886017 | C    | -1.34633285 | -1.58515348 | -3.68179063 |
| C    | -3.45046155 | 0.43856894  | -3.01201603 | C    | -0.57194807 | -2.86133317 | -3.86581301 |

|   |             |             |             |   |            |             |            |
|---|-------------|-------------|-------------|---|------------|-------------|------------|
| H | 0.45716462  | -2.70198583 | -4.23491923 | C | 7.45900599 | 0.64585027  | 4.70532255 |
| H | -0.50147736 | -3.42330925 | -2.92311253 | C | 7.42091373 | 1.78969725  | 5.50645374 |
| H | -1.05522077 | -3.52137394 | -4.59589847 | C | 6.34927851 | 2.67537643  | 5.39139093 |
| H | -1.93285311 | -1.22109405 | -4.51769661 | C | 5.32007038 | 2.41581968  | 4.48368056 |
| C | 4.21862880  | 0.96639156  | 2.71161569  | H | 4.49442273 | 3.11826069  | 4.39056826 |
| H | 4.62046707  | 0.64304169  | 1.74473680  | H | 6.31423692 | 3.57226640  | 6.00426825 |
| H | 3.61530068  | 1.86407214  | 2.52973738  | H | 8.22385104 | 1.99091685  | 6.21042009 |
| C | 5.34342683  | 1.27067494  | 3.67638215  | H | 8.29445203 | -0.04522102 | 4.78184228 |
| C | 6.43002622  | 0.39126869  | 3.79944530  | H | 6.47350935 | -0.49479237 | 3.16915224 |

**Table 33.** Geometric coordinates and thermally corrected MP2 energies for 5 spirocyclic dimer with one THF

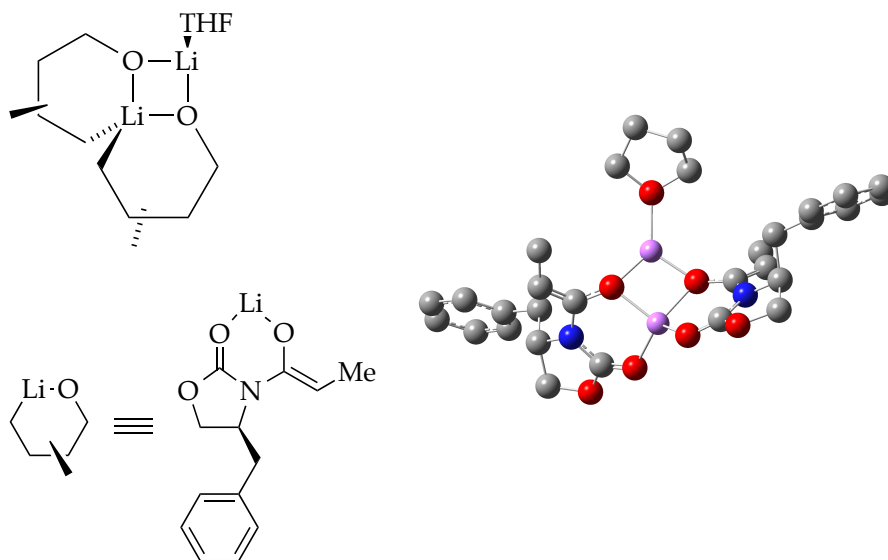

G = -1815.66899 Hartree

$G_{\text{MP2}} = -1135761.455$  kcal/mol

$\Delta G_{\text{MP2}} = 8.491542879$  kcal/mol Li vs. 5 spirocyclic dimer with three THF

| Atom | X           | Y           | Z           | Atom | X           | Y           | Z           |
|------|-------------|-------------|-------------|------|-------------|-------------|-------------|
| Li   | 0.00000000  | 0.00000000  | 0.00000000  | N    | -1.92920023 | 0.38526192  | -2.51071411 |
| O    | 0.00000000  | 0.00000000  | 1.91958140  | C    | -2.54047708 | 0.31006307  | -3.84085663 |
| C    | 1.02376138  | 0.00000000  | 2.59020437  | C    | -3.07901205 | -1.13166002 | -3.81187915 |
| O    | 0.95718669  | 0.15975008  | 3.94210213  | H    | -4.13191670 | -1.17025041 | -3.51128148 |
| C    | 2.24588609  | -0.12741943 | 4.50960344  | H    | -2.95396252 | -1.66260355 | -4.75715795 |
| H    | 2.23392431  | -1.15208681 | 4.89760098  | O    | -2.29507341 | -1.79850199 | -2.80643434 |
| H    | 2.42666399  | 0.56744737  | 5.33148345  | C    | -1.74006572 | -0.86091330 | -1.98876083 |
| C    | 3.23226250  | 0.03669571  | 3.34177954  | O    | -1.17955338 | -1.19002627 | -0.95040952 |
| H    | 3.98387738  | -0.75603344 | 3.36989080  | H    | -3.36642407 | 1.02094293  | -3.92599638 |
| N    | 2.32721961  | -0.14831192 | 2.20198717  | C    | -1.51177193 | 0.58644347  | -4.96269285 |
| C    | 2.77543422  | -0.27179532 | 0.81699291  | H    | -1.04045763 | 1.54969064  | -4.73534352 |
| C    | 4.00209832  | -0.80844440 | 0.59092111  | H    | -0.72922298 | -0.18072811 | -4.91431856 |
| H    | 4.58353872  | -1.18259164 | 1.42726950  | C    | -2.13664973 | 0.61845676  | -6.33986175 |
| C    | 4.56485372  | -1.02007805 | -0.78617512 | C    | -1.98515554 | -0.45144611 | -7.23212350 |
| H    | 5.50883096  | -0.47708373 | -0.94943780 | C    | -2.58932594 | -0.42819388 | -8.49108078 |
| H    | 4.78306094  | -2.08138081 | -0.97408183 | C    | -3.35789449 | 0.66975928  | -8.87827834 |
| H    | 3.85216697  | -0.69494235 | -1.55034083 | C    | -3.51466635 | 1.74509481  | -8.00041756 |
| O    | 1.93352029  | 0.16924144  | -0.07221772 | C    | -2.90861845 | 1.71824557  | -6.74478143 |
| Li   | 1.58038888  | 1.47203773  | -1.29563954 | H    | -3.02647564 | 2.56481800  | -6.07121726 |
| O    | -0.22977177 | 1.43659559  | -1.30957587 | H    | -4.10536204 | 2.60820018  | -8.29638757 |
| C    | -1.35729175 | 1.60431192  | -1.94419861 | H    | -3.82753277 | 0.69086810  | -9.85797867 |

|   |             |             |             |   |            |            |             |
|---|-------------|-------------|-------------|---|------------|------------|-------------|
| H | -2.45522636 | -1.26702713 | -9.16910129 | H | 3.67949204 | 4.25644117 | 0.23230131  |
| H | -1.37807387 | -1.30655517 | -6.94221223 | H | 4.20462367 | 1.98277233 | -0.53304155 |
| C | -2.03198491 | 2.76215984  | -2.13948505 | H | 4.96753121 | 2.61238587 | -2.01868524 |
| C | -1.54767608 | 4.09010589  | -1.63338483 | C | 3.93732913 | 1.41322670 | 3.29766395  |
| H | -2.31824603 | 4.60113694  | -1.03927167 | H | 4.41793516 | 1.49477482 | 2.31617592  |
| H | -0.67271256 | 3.95656833  | -0.98916082 | H | 3.17100978 | 2.19600469 | 3.35597823  |
| H | -1.27242035 | 4.78233146  | -2.44538301 | C | 4.95762734 | 1.59051286 | 4.40008454  |
| H | -2.99325064 | 2.73497098  | -2.64396958 | C | 6.18759850 | 0.91681426 | 4.34506420  |
| O | 2.88895999  | 2.74404008  | -1.91709897 | C | 7.12401955 | 1.04985150 | 5.36972204  |
| C | 4.18168322  | 2.78784547  | -1.27087919 | C | 6.84801060 | 1.86346108 | 6.47127954  |
| C | 4.26018559  | 4.19777655  | -0.69543168 | C | 5.63165098 | 2.54323507 | 6.53707100  |
| C | 3.59977147  | 5.03192308  | -1.80925184 | C | 4.69585101 | 2.40576917 | 5.50938987  |
| C | 2.55511703  | 4.06881184  | -2.40989920 | H | 3.75362319 | 2.94712711 | 5.56375963  |
| H | 2.57865600  | 4.05507571  | -3.50478526 | H | 5.40948678 | 3.18386707 | 7.38649784  |
| H | 1.53425240  | 4.28613550  | -2.08406709 | H | 7.57801142 | 1.96939116 | 7.26917541  |
| H | 4.34216537  | 5.31133531  | -2.56468386 | H | 8.07210507 | 0.52209463 | 5.30636236  |
| H | 3.14273224  | 5.95253582  | -1.43599771 | H | 6.41568571 | 0.28977998 | 3.48537626  |
| H | 5.28575752  | 4.51076019  | -0.47864388 |   |            |            |             |

**Table 34.** Geometric coordinates and thermally corrected MP2 energies for 5 spirocyclic dimer with two THF

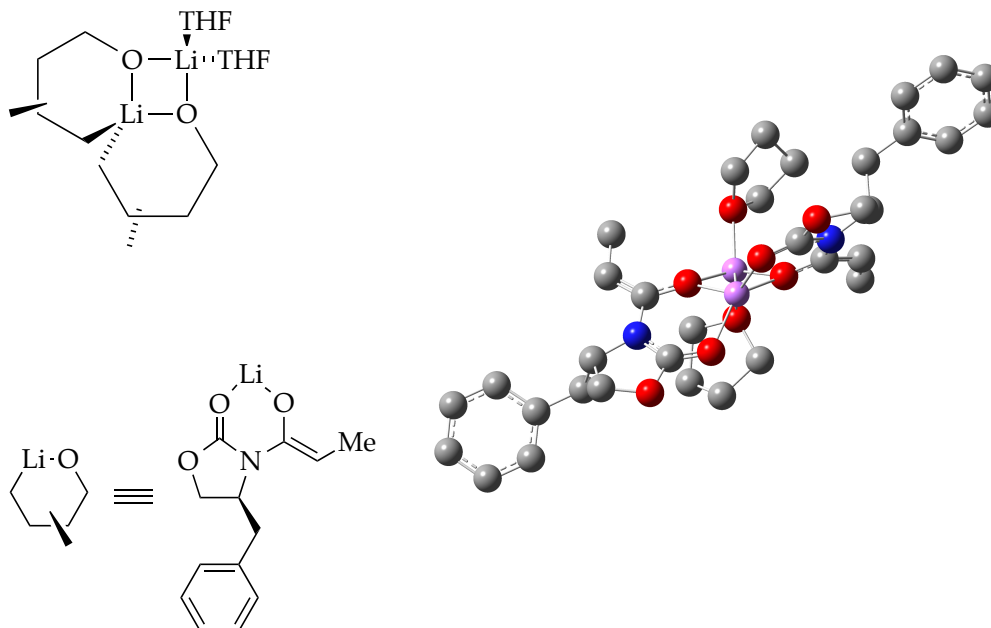

$G = -2048.021479$  Hartree

$G_{\text{MP2}} = -1281086.85$  kcal/mol

$\Delta G_{\text{MP2}} = 1.939384828$  kcal/mol Li vs. 5 spirocyclic dimer with three THF

| Atom | X          | Y           | Z           | Atom | X           | Y           | Z           |
|------|------------|-------------|-------------|------|-------------|-------------|-------------|
| Li   | 0.00000000 | 0.00000000  | 0.00000000  | Li   | 1.33472490  | 1.58354811  | -1.49517439 |
| O    | 0.00000000 | 0.00000000  | 1.90774580  | O    | -0.52321012 | 1.31183697  | -1.28183373 |
| C    | 1.03245062 | 0.00000000  | 2.56391855  | C    | -1.67164774 | 1.45498192  | -1.86897011 |
| O    | 0.96991935 | -0.11135469 | 3.92185282  | N    | -2.48853439 | 0.24095840  | -1.93680571 |
| C    | 2.29454408 | -0.33645201 | 4.42980940  | C    | -3.72162893 | 0.12411960  | -2.72634322 |
| H    | 2.43170686 | -1.41309204 | 4.58252638  | C    | -4.30850400 | -1.16247067 | -2.13298729 |
| H    | 2.39360474 | 0.18072815  | 5.38553090  | H    | -4.99382699 | -0.95935895 | -1.30219134 |
| C    | 3.21831636 | 0.21460404  | 3.33618190  | H    | -4.80738773 | -1.79499268 | -2.86889033 |
| H    | 4.09223315 | -0.42985287 | 3.21748330  | O    | -3.16603839 | -1.86871141 | -1.62111998 |
| N    | 2.33913008 | 0.10452420  | 2.16396745  | C    | -2.16471351 | -0.97182147 | -1.38788864 |
| C    | 2.80454053 | 0.22376953  | 0.78034585  | O    | -1.16585907 | -1.32307447 | -0.77247814 |
| C    | 4.14668676 | 0.16394247  | 0.55912364  | H    | -4.37942607 | 0.97278493  | -2.52531751 |
| H    | 4.82361070 | -0.02568103 | 1.38377921  | C    | -3.43102342 | 0.02883607  | -4.24512886 |
| C    | 4.76038824 | 0.22754098  | -0.81134746 | H    | -2.79697599 | 0.88173137  | -4.50924468 |
| H    | 5.64576009 | 0.87929364  | -0.83205815 | H    | -2.84659659 | -0.88218291 | -4.42511320 |
| H    | 5.09563481 | -0.75983702 | -1.16785550 | C    | -4.68760292 | 0.01969144  | -5.08714226 |
| H    | 4.04878255 | 0.60931214  | -1.54848042 | C    | -5.15949117 | -1.16102596 | -5.67656504 |
| O    | 1.87045233 | 0.38172643  | -0.10834849 | C    | -6.33582050 | -1.16869455 | -6.42934977 |

|   |             |             |             |   |             |             |             |
|---|-------------|-------------|-------------|---|-------------|-------------|-------------|
| C | -7.06203789 | 0.00945234  | -6.60446280 | C | 1.14175316  | 1.45370681  | -4.43570359 |
| C | -6.60183592 | 1.19482322  | -6.02601731 | O | 1.93658918  | 0.97950210  | -3.31566845 |
| C | -5.42600491 | 1.19809667  | -5.27646312 | C | 2.11803990  | -0.45435861 | -3.41827013 |
| H | -5.06939578 | 2.12861752  | -4.83946131 | C | 0.96469438  | -0.93517015 | -4.29279961 |
| H | -7.15692231 | 2.11920120  | -6.16317627 | C | 0.83174239  | 0.22066925  | -5.29786054 |
| H | -7.97687858 | 0.00647356  | -7.19085467 | H | 1.57121971  | 0.11304764  | -6.10013791 |
| H | -6.68124645 | -2.09513607 | -6.88070949 | H | -0.15837912 | 0.28116061  | -5.75928906 |
| H | -4.59307839 | -2.08191667 | -5.55370777 | H | 1.17007730  | -1.89925229 | -4.76809266 |
| C | -2.18050413 | 2.59502334  | -2.41107371 | H | 0.05690268  | -1.03268124 | -3.68777948 |
| C | -1.46801369 | 3.91786363  | -2.36027587 | H | 3.09123731  | -0.65818442 | -3.88690814 |
| H | -1.91978597 | 4.60616834  | -1.62755064 | H | 2.11779636  | -0.85349621 | -2.40218681 |
| H | -0.41681692 | 3.79484979  | -2.08459365 | H | 0.23149695  | 1.90794444  | -4.03120215 |
| H | -1.50117366 | 4.43488899  | -3.33032654 | H | 1.71591346  | 2.21701138  | -4.97188621 |
| H | -3.17633525 | 2.59690642  | -2.83856240 | C | 3.33690469  | 3.84742829  | -1.63469747 |
| C | 3.67076127  | 1.67469418  | 3.58303805  | O | 2.02129225  | 3.43205460  | -1.21381021 |
| H | 4.11117786  | 2.03906475  | 2.64893919  | C | 1.73963404  | 3.95739229  | 0.11175529  |
| H | 2.77778284  | 2.27985191  | 3.78371731  | C | 2.98495760  | 4.75387242  | 0.52955013  |
| C | 4.65811849  | 1.80458959  | 4.72152027  | C | 4.09188749  | 4.13353731  | -0.33941457 |
| C | 5.98837301  | 1.38659537  | 4.56221670  | H | 4.94985199  | 4.79693988  | -0.48579188 |
| C | 6.89881601  | 1.47597929  | 5.61467832  | H | 4.44255409  | 3.19300630  | 0.10002037  |
| C | 6.49550376  | 1.98902606  | 6.84988167  | H | 2.86266578  | 5.81661990  | 0.28976768  |
| C | 5.17784693  | 2.41366357  | 7.02134930  | H | 3.18472499  | 4.67299703  | 1.60206695  |
| C | 4.26905815  | 2.32085190  | 5.96499159  | H | 0.83289920  | 4.56704427  | 0.05731129  |
| H | 3.24596904  | 2.66419748  | 6.10371578  | H | 1.55027018  | 3.10248872  | 0.76833571  |
| H | 4.85530138  | 2.82088654  | 7.97604012  | H | 3.76040022  | 3.03947385  | -2.23603430 |
| H | 7.20496528  | 2.06125359  | 7.66977715  | H | 3.24969793  | 4.74879272  | -2.25838352 |
| H | 7.92540699  | 1.14977447  | 5.46937596  |   |             |             |             |
| H | 6.31507605  | 0.99688116  | 3.60013571  |   |             |             |             |

**Table 35.** Geometric coordinates and thermally corrected MP2 energies for 5 spirocyclic dimer with two THF isomer

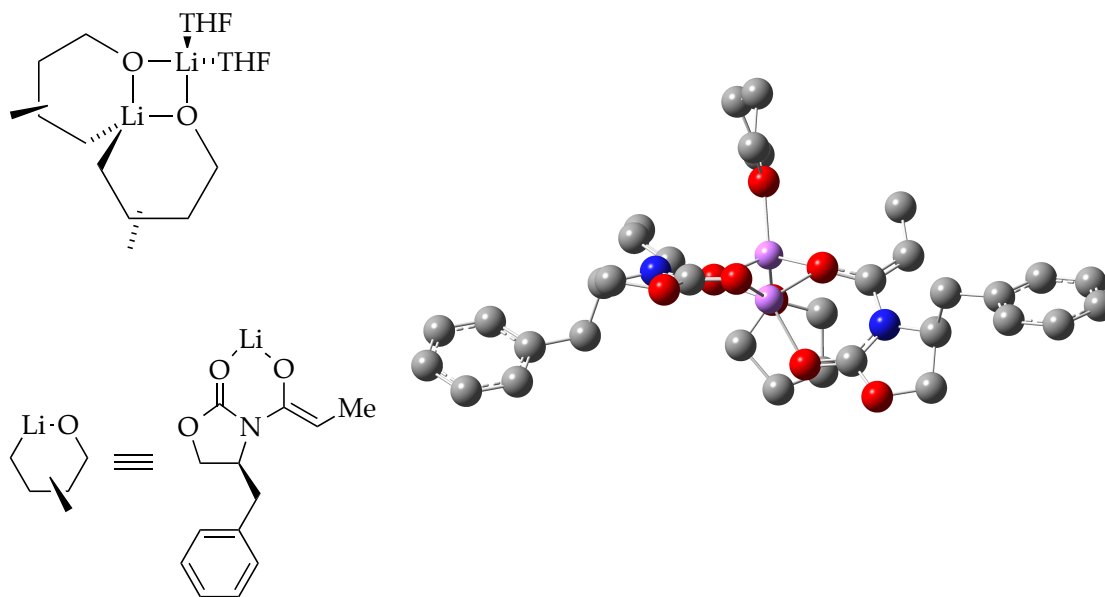

G = -2048.023225 Hartree

$G_{\text{MP2}} = -1281086.402$  kcal/mol

$\Delta G_{\text{MP2}} = 2.163553926$  kcal/mol Li vs. 5 spirocyclic dimer with three THF

| Atom | X           | Y           | Z           | Atom | X           | Y           | Z           |
|------|-------------|-------------|-------------|------|-------------|-------------|-------------|
| Li   | 0.00000000  | 0.00000000  | 0.00000000  | C    | -2.02343338 | -0.76505956 | -1.91714880 |
| O    | 0.00000000  | 0.00000000  | 1.91862420  | N    | -2.50701820 | 0.60600477  | -1.73338174 |
| C    | 1.09275453  | 0.00000000  | 2.47370464  | C    | -3.91524618 | 1.00154200  | -1.86962360 |
| O    | 1.24927809  | 0.60988408  | 3.68155922  | C    | -3.77759626 | 2.53123740  | -1.82392320 |
| C    | 2.55467968  | 0.29585299  | 4.19663437  | H    | -3.71433802 | 2.97000525  | -2.82633070 |
| H    | 2.45307460  | -0.51327012 | 4.92884815  | H    | -4.57429000 | 3.02391678  | -1.26411179 |
| H    | 2.95482555  | 1.18247805  | 4.69129861  | O    | -2.53108401 | 2.76405919  | -1.14560711 |
| C    | 3.36469494  | -0.13845082 | 2.96484984  | C    | -1.77318164 | 1.63385729  | -1.21183939 |
| H    | 3.99855516  | -0.99187895 | 3.21494558  | O    | -0.60832682 | 1.64958300  | -0.82690270 |
| N    | 2.27685043  | -0.54400070 | 2.06449559  | H    | -4.31123963 | 0.69030390  | -2.83878969 |
| C    | 2.49787380  | -1.21262757 | 0.77990720  | C    | -4.78742697 | 0.40456475  | -0.73993411 |
| C    | 3.54832363  | -2.07437749 | 0.71685953  | H    | -4.61316015 | -0.67699926 | -0.73825356 |
| H    | 4.10432095  | -2.29589344 | 1.62214764  | H    | -4.42785385 | 0.79398038  | 0.22029794  |
| C    | 4.00954006  | -2.74858459 | -0.54325132 | C    | -6.25911977 | 0.70548535  | -0.91571029 |
| H    | 3.46785124  | -2.37210704 | -1.41555548 | C    | -6.89977525 | 1.68168319  | -0.14073173 |
| H    | 3.86855884  | -3.84086042 | -0.51555301 | C    | -8.25216475 | 1.97547532  | -0.32891985 |
| H    | 5.08259451  | -2.58318594 | -0.72218690 | C    | -8.98763681 | 1.29520517  | -1.29971445 |
| O    | 1.67891324  | -0.88018089 | -0.17346067 | C    | -8.36333256 | 0.31632918  | -2.07667222 |
| Li   | 0.75702020  | -1.81591107 | -1.58566120 | C    | -7.01321997 | 0.02522671  | -1.88439010 |
| O    | -0.96920526 | -1.07835612 | -1.22862586 | H    | -6.53760144 | -0.74782886 | -2.48472287 |

|   |              |             |             |   |             |             |             |
|---|--------------|-------------|-------------|---|-------------|-------------|-------------|
| H | -8.93058508  | -0.22552940 | -2.82913270 | C | 1.69345103  | 1.04651074  | -3.90084941 |
| H | -10.04048024 | 1.52065893  | -1.44671034 | C | 0.96481420  | 0.34273916  | -5.05979039 |
| H | -8.73018113  | 2.73284919  | 0.28692778  | C | 0.67018805  | -1.05922381 | -4.49164349 |
| H | -6.33661190  | 2.20745733  | 0.62751333  | H | 0.88017786  | -1.85581753 | -5.21485257 |
| C | -2.72944196  | -1.56186219 | -2.76490574 | H | -0.36060868 | -1.15781193 | -4.13908281 |
| C | -2.42272993  | -3.01693719 | -2.98145308 | H | 1.62052167  | 0.27450863  | -5.93558730 |
| H | -1.58323183  | -3.33660275 | -2.35735518 | H | 0.05085176  | 0.85959519  | -5.36701774 |
| H | -3.28445083  | -3.65762801 | -2.73885439 | H | 2.35509987  | 1.85062007  | -4.23807066 |
| H | -2.16120815  | -3.23852407 | -4.02837325 | H | 0.98064391  | 1.46227084  | -3.18061717 |
| H | -3.56795188  | -1.14810195 | -3.31497264 | H | 2.69051379  | 0.02821123  | -2.20687759 |
| O | 0.76784189   | -3.78433097 | -1.38566858 | H | 3.36977307  | -0.35109497 | -3.82189007 |
| C | 0.40236445   | -4.27043885 | -0.07049658 | C | 4.23302618  | 0.97989405  | 2.34248417  |
| C | 0.33599840   | -5.79057382 | -0.21361131 | H | 4.56060487  | 0.61985566  | 1.36090051  |
| C | 1.43432942   | -6.05936791 | -1.25512418 | H | 3.60044362  | 1.85984023  | 2.17359880  |
| C | 1.29523927   | -4.85567164 | -2.19397338 | C | 5.42582204  | 1.34204183  | 3.19911028  |
| H | 0.58698076   | -5.05541755 | -3.00842535 | C | 6.53346067  | 0.48351260  | 3.27478081  |
| H | 2.24613941   | -4.52989226 | -2.62602730 | C | 7.62565335  | 0.79241661  | 4.08482060  |
| H | 1.31379244   | -7.01227672 | -1.77928307 | C | 7.63141238  | 1.97042389  | 4.83581779  |
| H | 2.42009556   | -6.05696244 | -0.77557950 | C | 6.53942215  | 2.83580825  | 4.76671366  |
| H | -0.64294892  | -6.09703361 | -0.60071622 | C | 5.44701545  | 2.52186140  | 3.95511797  |
| H | 0.50537739   | -6.30760374 | 0.73563940  | H | 4.60445745  | 3.20779899  | 3.89734341  |
| H | 1.17443247   | -3.95636940 | 0.64246900  | H | 6.53705101  | 3.75871513  | 5.34084076  |
| H | -0.54734211  | -3.80219567 | 0.20000689  | H | 8.48330751  | 2.21332857  | 5.46524022  |
| O | 1.54093430   | -1.23135114 | -3.34180368 | H | 8.47581030  | 0.11631285  | 4.12586915  |
| C | 2.45317306   | -0.11149046 | -3.26265637 | H | 6.54151720  | -0.43012825 | 2.68364610  |



**Table 36.** Geometric coordinates and thermally corrected MP2 energies for 5 spirocyclic dimer trans with two THF

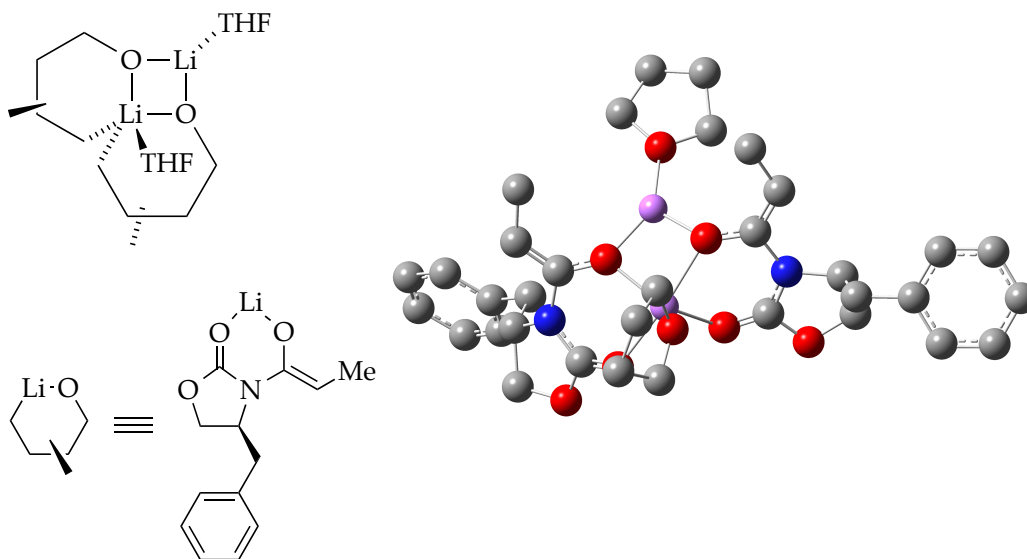

$G = -2048.016706$  Hartree

$G_{\text{MP2}} = -1281080.017$  kcal/mol

$\Delta G_{\text{MP2}} = 5.355753957$  kcal/mol Li vs. 5 spirocyclic dimer with three THF

| Atom | X          | Y          | Z           | Atom | X           | Y           | Z           |
|------|------------|------------|-------------|------|-------------|-------------|-------------|
| Li   | 0.00000000 | 0.00000000 | 0.00000000  | H    | 6.09763975  | 2.16355520  | -2.90543720 |
| Li   | 0.00000000 | 0.00000000 | 2.63048850  | H    | 8.40275767  | 2.97837866  | -3.28012117 |
| O    | 1.43067082 | 0.00000000 | 1.52819888  | H    | 10.09629211 | 2.81461334  | -1.46423555 |
| C    | 2.63862969 | 0.46689047 | 1.53439309  | H    | 9.45700041  | 1.82170722  | 0.72635727  |
| N    | 2.89013112 | 1.53213980 | 0.57511335  | H    | 7.15210701  | 1.00881891  | 1.09674796  |
| C    | 1.94999408 | 2.07618534 | -0.26528132 | C    | 3.66133730  | 0.06607244  | 2.34322836  |
| O    | 0.77753636 | 1.78617716 | -0.43764247 | H    | 4.63126677  | 0.54565609  | 2.27988423  |
| O    | 2.51856100 | 3.08900067 | -0.98819034 | C    | 3.52061909  | -1.06955598 | 3.31889441  |
| C    | 3.83030671 | 3.35488389 | -0.46793255 | H    | 4.32615936  | -1.80945023 | 3.20285409  |
| H    | 3.77083994 | 4.20799893 | 0.21861877  | H    | 3.55448814  | -0.74540140 | 4.37252400  |
| H    | 4.49014384 | 3.60602027 | -1.30011436 | H    | 2.56959561  | -1.59071895 | 3.16705641  |
| C    | 4.22068675 | 2.05916429 | 0.25531595  | O    | -1.31549075 | -0.42814885 | 1.47565498  |
| H    | 4.77147415 | 2.28345484 | 1.17220736  | C    | -2.57108934 | -0.75350046 | 1.38850354  |
| C    | 5.03444777 | 1.07613349 | -0.62321645 | N    | -3.30942195 | -0.08179707 | 0.32398879  |
| H    | 5.03113916 | 0.10606192 | -0.11518506 | C    | -4.64410456 | 0.49546492  | 0.49490984  |
| H    | 4.50224919 | 0.94620717 | -1.57339851 | C    | -4.94262730 | 0.92155303  | -0.95405729 |
| C    | 6.45142087 | 1.54257429 | -0.87248881 | H    | -5.52233108 | 0.16255254  | -1.49191697 |
| C    | 7.41984682 | 1.45145158 | 0.13933117  | H    | -5.45343251 | 1.88338700  | -1.02860330 |
| C    | 8.72138614 | 1.90642615 | -0.06945847 | O    | -3.65321215 | 1.03890780  | -1.57871324 |
| C    | 9.08158641 | 2.46232842 | -1.29936863 | C    | -2.74127345 | 0.33375812  | -0.84552081 |
| C    | 8.13136799 | 2.55496718 | -2.31651809 | O    | -1.60952594 | 0.14184257  | -1.26232091 |
| C    | 6.82890308 | 2.09865112 | -2.10246626 | H    | -5.35718122 | -0.26666019 | 0.82042744  |

|   |             |             |             |
|---|-------------|-------------|-------------|
| C | -4.64154656 | 1.65677415  | 1.51728025  |
| H | -4.18894088 | 1.26876953  | 2.43728483  |
| H | -3.98670890 | 2.45185509  | 1.14084183  |
| C | -6.02611276 | 2.19506484  | 1.80062006  |
| C | -6.45843709 | 3.41527090  | 1.26376439  |
| C | -7.74899418 | 3.89053278  | 1.50746933  |
| C | -8.63101422 | 3.14977098  | 2.29460732  |
| C | -8.21263176 | 1.93317415  | 2.83919831  |
| C | -6.92291713 | 1.46309123  | 2.59433598  |
| H | -6.60101038 | 0.51954411  | 3.03082226  |
| H | -8.89034828 | 1.35246127  | 3.45976793  |
| H | -9.63501719 | 3.51848487  | 2.48681473  |
| H | -8.06205228 | 4.84157957  | 1.08445176  |
| H | -5.77300493 | 4.00458234  | 0.65826759  |
| C | -3.26739678 | -1.61645675 | 2.17144835  |
| C | -2.66739336 | -2.35535561 | 3.33283132  |
| H | -2.87153962 | -3.43409610 | 3.27634588  |
| H | -1.57856086 | -2.23359333 | 3.35398658  |
| H | -3.05919341 | -2.01827671 | 4.30657071  |
| H | -4.30632242 | -1.82183982 | 1.93101271  |
| O | 0.03555860  | 0.77747213  | 4.39387688  |
| C | -0.90619139 | 0.64513357  | 5.48686300  |
| C | -0.33138059 | 1.47367515  | 6.64833113  |
| C | 1.15973581  | 1.59009626  | 6.28667510  |
| C | 1.10213228  | 1.68155001  | 4.76544921  |
| H | 2.00599121  | 1.35596886  | 4.24479793  |
| H | 0.84404541  | 2.69806492  | 4.43548583  |
| H | 1.70592134  | 0.68947351  | 6.59014993  |
| H | 1.64528737  | 2.45743817  | 6.74369143  |
| H | -0.50426581 | 0.99835005  | 7.61810730  |
| H | -0.79222292 | 2.46750647  | 6.67522367  |
| H | -1.88762005 | 0.99740455  | 5.15330248  |
| H | -0.98200686 | -0.41958840 | 5.73110420  |
| O | 0.90614935  | -1.51861945 | -1.04563279 |
| C | 1.17152339  | -2.70447016 | -0.25896934 |
| C | 1.06501395  | -3.88916165 | -1.22821216 |
| C | 0.10280466  | -3.35140627 | -2.29934351 |
| C | 0.53006278  | -1.88682286 | -2.38814124 |
| H | -0.26147899 | -1.20641562 | -2.70544159 |
| H | 1.40029565  | -1.76756620 | -3.05018547 |
| H | -0.93515124 | -3.42128337 | -1.95291368 |
| H | 0.18161069  | -3.87461523 | -3.25766260 |
| H | 0.70437456  | -4.79737229 | -0.73535141 |
| H | 2.04169230  | -4.11266913 | -1.67455701 |
| H | 2.15670208  | -2.60120836 | 0.20414874  |
| H | 0.41820269  | -2.75848496 | 0.53550613  |

**Table 37.** Geometric coordinates and thermally corrected MP2 energies for 5 spirocyclic dimer with three THF

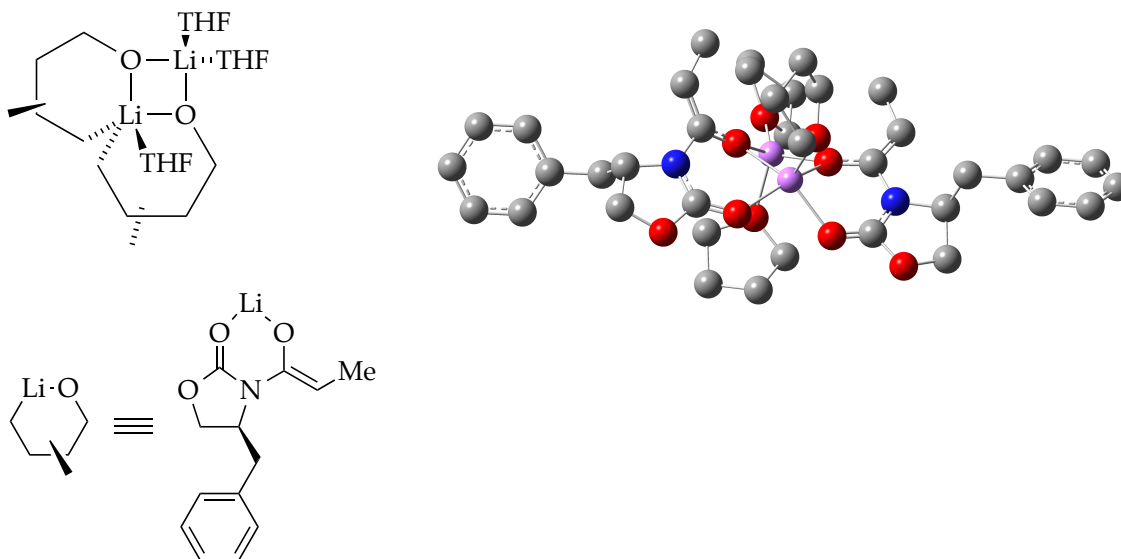

G = - 2280.364091 Hartree

G<sub>MP2</sub> = - 1426403.019 kcal/mol

ΔG<sub>MP2</sub> = 0 kcal/mol Li vs. 5 spirocyclic dimer with three THF

| Atom | X          | Y           | Z          | Atom | X           | Y           | Z           |
|------|------------|-------------|------------|------|-------------|-------------|-------------|
| Li   | 0.0000000  | 0.0000000   | 0.0000000  | H    | 10.20173676 | -0.42171454 | 5.18406992  |
| Li   | 0.0000000  | 0.0000000   | 2.64675340 | H    | 9.57085847  | 0.21525196  | 2.86257466  |
| O    | 1.42158727 | 0.0000000   | 1.22252404 | H    | 7.19038623  | 0.45962248  | 2.24437674  |
| C    | 2.70017616 | -0.07916138 | 1.40962945 | C    | 3.68347372  | 0.54005379  | 0.69736431  |
| N    | 3.10345919 | -0.95148272 | 2.51077992 | H    | 4.72451744  | 0.37921376  | 0.95129433  |
| C    | 2.24401552 | -1.59208037 | 3.36604910 | C    | 3.40445209  | 1.47805017  | -0.44200456 |
| O    | 1.02776929 | -1.53558835 | 3.45652268 | H    | 3.75304414  | 2.50246430  | -0.23523650 |
| O    | 2.95882065 | -2.39081439 | 4.21870318 | H    | 3.90707471  | 1.16684569  | -1.37206797 |
| C    | 4.32759506 | -2.42201987 | 3.78251697 | H    | 2.33134404  | 1.53059606  | -0.64603361 |
| H    | 4.48391403 | -3.32016850 | 3.17279330 | O    | -1.25466153 | 0.77082323  | 1.15133164  |
| H    | 4.97166502 | -2.46372992 | 4.66237868 | C    | -2.33903443 | 1.40665717  | 1.45839205  |
| C    | 4.48596158 | -1.13545883 | 2.96439887 | N    | -3.27833763 | 0.65456561  | 2.29930224  |
| H    | 5.14564339 | -1.29616799 | 2.10814527 | C    | -4.73077112 | 0.64653867  | 2.11514336  |
| C    | 4.98459092 | 0.06752915  | 3.80594591 | C    | -5.15945031 | -0.19230477 | 3.33455295  |
| H    | 4.81620975 | 0.97388572  | 3.21573878 | H    | -5.46704343 | 0.43695706  | 4.17750621  |
| H    | 4.35267569 | 0.14276369  | 4.69925115 | H    | -5.95582010 | -0.90507751 | 3.11186467  |
| C    | 6.43976478 | -0.04987625 | 4.20176893 | O    | -3.98265630 | -0.92407155 | 3.71747341  |
| C    | 7.45608840 | 0.16992794  | 3.25907166 | C    | -2.88523435 | -0.30024934 | 3.18921826  |
| C    | 8.79973480 | 0.03606866  | 3.60749060 | O    | -1.75637968 | -0.61489450 | 3.53628732  |
| C    | 9.15487827 | -0.31987133 | 4.91080470 | H    | -5.13504286 | 1.65956339  | 2.19261179  |
| C    | 8.15613350 | -0.53668423 | 5.86036806 | C    | -5.14236853 | 0.04544446  | 0.75033303  |
| C    | 6.81188336 | -0.40240949 | 5.50642505 | H    | -4.57047773 | 0.57672072  | -0.01918190 |
| H    | 6.03960493 | -0.56195990 | 6.25609898 | H    | -4.83084267 | -1.00595533 | 0.72401781  |
| H    | 8.42103710 | -0.80659621 | 6.87943467 | C    | -6.62556416 | 0.16297190  | 0.47851334  |

|   |              |             |             |   |             |            |             |
|---|--------------|-------------|-------------|---|-------------|------------|-------------|
| C | -7.47800246  | -0.94331326 | 0.59278459  | H | -1.10637647 | 2.01280937 | -2.42293687 |
| C | -8.85096762  | -0.81906738 | 0.36880409  | H | 0.57588163  | 2.54552465 | -2.18653644 |
| C | -9.39471475  | 0.41901075  | 0.02600697  |   |             |            |             |
| C | -8.55630339  | 1.52988565  | -0.09550580 |   |             |            |             |
| C | -7.18599739  | 1.40099612  | 0.12789485  |   |             |            |             |
| H | -6.53770853  | 2.26833267  | 0.02029446  |   |             |            |             |
| H | -8.96986830  | 2.49680664  | -0.37034986 |   |             |            |             |
| H | -10.46236076 | 0.51786082  | -0.15067490 |   |             |            |             |
| H | -9.49325448  | -1.69130201 | 0.45869457  |   |             |            |             |
| H | -7.06051600  | -1.91499147 | 0.84860301  |   |             |            |             |
| C | -2.72074104  | 2.66317182  | 1.10517845  |   |             |            |             |
| C | -1.91011929  | 3.55844301  | 0.21332943  |   |             |            |             |
| H | -1.68514161  | 4.52274127  | 0.69339912  |   |             |            |             |
| H | -0.95638209  | 3.08635815  | -0.04003593 |   |             |            |             |
| H | -2.42612375  | 3.79961309  | -0.73005537 |   |             |            |             |
| H | -3.64979027  | 3.06163447  | 1.50268644  |   |             |            |             |
| O | 0.56543717   | 1.56534458  | 3.82778622  |   |             |            |             |
| C | 0.81848338   | 2.80623787  | 3.12105374  |   |             |            |             |
| C | 0.19293384   | 3.92431721  | 3.97287657  |   |             |            |             |
| C | -0.83394886  | 3.16523622  | 4.83023380  |   |             |            |             |
| C | -0.11190468  | 1.84035697  | 5.06675306  |   |             |            |             |
| H | -0.76883216  | 0.99278082  | 5.27297151  |   |             |            |             |
| H | 0.62610727   | 1.92902097  | 5.87845697  |   |             |            |             |
| H | -1.75134312  | 2.99488354  | 4.25567237  |   |             |            |             |
| H | -1.09103855  | 3.68309251  | 5.75993680  |   |             |            |             |
| H | -0.25934893  | 4.70673045  | 3.35625016  |   |             |            |             |
| H | 0.94884927   | 4.39480471  | 4.61322193  |   |             |            |             |
| H | 1.89953055   | 2.92034042  | 2.98818019  |   |             |            |             |
| H | 0.35016021   | 2.71692712  | 2.13801124  |   |             |            |             |
| O | -0.47667988  | -1.98146162 | -0.35773118 |   |             |            |             |
| C | -1.88852367  | -2.30284384 | -0.34434523 |   |             |            |             |
| C | -2.03521251  | -3.60983883 | 0.45533688  |   |             |            |             |
| C | -0.73445918  | -3.66009543 | 1.27479345  |   |             |            |             |
| C | 0.26292025   | -3.02676331 | 0.30947420  |   |             |            |             |
| H | 0.61977938   | -3.75107342 | -0.43864421 |   |             |            |             |
| H | 1.11486739   | -2.55160894 | 0.79620809  |   |             |            |             |
| H | -0.45154159  | -4.67669763 | 1.56574388  |   |             |            |             |
| H | -0.81418570  | -3.04994509 | 2.17958617  |   |             |            |             |
| H | -2.09680523  | -4.47023546 | -0.22172596 |   |             |            |             |
| H | -2.93235790  | -3.61166843 | 1.08185553  |   |             |            |             |
| H | -2.40341643  | -1.46224768 | 0.12998612  |   |             |            |             |
| H | -2.24101976  | -2.39757185 | -1.37842868 |   |             |            |             |
| O | 0.21839509   | 0.51320090  | -1.92850377 |   |             |            |             |
| C | -0.06066991  | 1.75496831  | -2.60661915 |   |             |            |             |
| C | 0.27203018   | 1.49708002  | -4.07594739 |   |             |            |             |
| C | 1.45504793   | 0.52320790  | -3.96030531 |   |             |            |             |
| C | 1.05687665   | -0.33279684 | -2.75343972 |   |             |            |             |
| H | 1.90973550   | -0.66075765 | -2.15252042 |   |             |            |             |
| H | 0.47144132   | -1.21172592 | -3.04508163 |   |             |            |             |
| H | 2.37968865   | 1.07287969  | -3.75018783 |   |             |            |             |
| H | 1.61358423   | -0.07716333 | -4.86120721 |   |             |            |             |
| H | 0.51685549   | 2.41594037  | -4.61724649 |   |             |            |             |
| H | -0.57435396  | 1.01711052  | -4.58180258 |   |             |            |             |

**Table 38.** Geometric coordinates and thermally corrected MP2 energies for 5  $D_{2d}$  tetramer

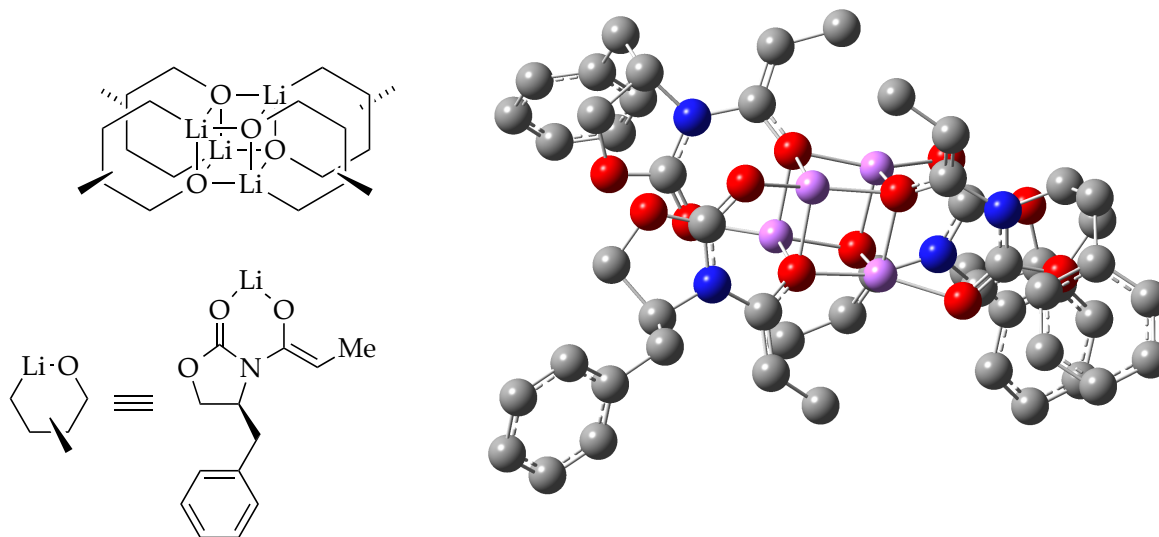

$G = -3166.662534$  Hartree

$G_{MP2} = -1980930.794$  kcal/mol

$\Delta G_{MP2} = 0.375561044$  kcal/mol Li vs. 5 spirocyclic dimer with three THF

| Atom | X           | Y           | Z           | Atom | X           | Y           | Z           |
|------|-------------|-------------|-------------|------|-------------|-------------|-------------|
| Li   | 0.00000000  | 0.00000000  | 0.00000000  | H    | -1.26428982 | 1.99018207  | -6.10391756 |
| O    | 0.00000000  | 0.00000000  | 1.89861070  | H    | -1.29118253 | 3.78066966  | -6.22229477 |
| C    | 1.05585130  | 0.00000000  | 2.52402978  | C    | -1.92064642 | 2.98500716  | -4.25853369 |
| O    | 1.12651741  | -0.59231240 | 3.74489124  | H    | -2.82262435 | 2.37091814  | -4.30870624 |
| C    | 2.50137875  | -0.59782195 | 4.18227305  | N    | -0.95399263 | 2.35428375  | -3.34779468 |
| H    | 2.91749791  | -1.59017164 | 3.98345487  | C    | -1.30389776 | 1.62759451  | -2.14149057 |
| H    | 2.50872415  | -0.39220160 | 5.25391674  | C    | -2.51844401 | 1.82556346  | -1.57783798 |
| C    | 3.17781310  | 0.49877718  | 3.34189588  | H    | -3.18305215 | 2.57926802  | -1.98217944 |
| H    | 4.16626791  | 0.18314087  | 2.99581318  | C    | -2.99438943 | 1.06416526  | -0.37019718 |
| N    | 2.26657711  | 0.53607049  | 2.19012104  | H    | -2.59131260 | 0.04451436  | -0.34260460 |
| C    | 2.64016857  | 0.95192206  | 0.85098338  | H    | -2.71374752 | 1.54719054  | 0.57873746  |
| C    | 3.69779669  | 1.77859681  | 0.67780146  | H    | -4.08745118 | 0.97571288  | -0.36893686 |
| H    | 4.21004590  | 2.18878057  | 1.53828089  | O    | -0.38806896 | 0.77865933  | -1.73170696 |
| C    | 4.20137889  | 2.17854646  | -0.68327539 | Li   | -0.01973221 | -1.03106286 | -2.49492021 |
| H    | 3.67767766  | 3.05574343  | -1.09407348 | O    | -0.29270694 | -1.07497797 | -4.37329619 |
| H    | 5.26669231  | 2.43481941  | -0.64615718 | C    | 0.60921506  | -0.76095601 | -5.14394454 |
| H    | 4.09136604  | 1.36805456  | -1.41464629 | O    | 0.31566577  | -0.20466281 | -6.34840040 |
| O    | 1.91456735  | 0.42211923  | -0.10906251 | C    | 1.54258265  | 0.21819224  | -6.97883753 |
| Li   | 1.55502468  | 0.97865032  | -1.93350744 | H    | 1.65326183  | 1.29511017  | -6.81933748 |
| O    | 1.39380755  | 2.30442534  | -3.29685634 | H    | 1.45933624  | 0.00014348  | -8.04479982 |
| C    | 0.30965783  | 2.50810502  | -3.83698836 | C    | 2.64015445  | -0.59357477 | -6.26983272 |
| O    | 0.25857136  | 2.98092212  | -5.11391698 | H    | 3.52025717  | 0.02194645  | -6.06248136 |
| C    | -1.11762441 | 2.92962831  | -5.56274456 | N    | 1.96141851  | -0.88569767 | -5.00006409 |

|    |             |             |             |   |             |             |             |
|----|-------------|-------------|-------------|---|-------------|-------------|-------------|
| C  | 2.63442461  | -1.13326491 | -3.73847330 | H | 1.72300798  | -2.21555350 | -9.42887887 |
| C  | 3.91025443  | -1.58519171 | -3.73829876 | C | -2.27063653 | 4.43620771  | -3.83881216 |
| H  | 4.39538785  | -1.83534211 | -4.67272286 | H | -2.59797238 | 4.42768235  | -2.79451128 |
| C  | 4.70369053  | -1.77659578 | -2.47342918 | H | -1.35105396 | 5.03309284  | -3.87459170 |
| H  | 4.54491543  | -2.76383502 | -2.01229470 | C | -3.33214590 | 5.05957908  | -4.72022930 |
| H  | 5.77877359  | -1.68808094 | -2.66917762 | C | -4.66965354 | 4.64507999  | -4.62662679 |
| H  | 4.45237947  | -1.02447135 | -1.71511423 | C | -5.65006310 | 5.19637888  | -5.45075399 |
| O  | 1.92589375  | -0.83362023 | -2.67215027 | C | -5.31053114 | 6.17692870  | -6.38600986 |
| Li | 2.02399625  | -1.43203668 | -0.82819381 | C | -3.98574503 | 6.60169457  | -6.48757954 |
| O  | 2.48122320  | -2.71027372 | 0.51335988  | C | -3.00673072 | 6.04574187  | -5.66104625 |
| C  | 1.60387382  | -3.22923745 | 1.19859453  | H | -1.97767295 | 6.39055064  | -5.73850614 |
| O  | 1.88658772  | -3.66540840 | 2.45817005  | H | -3.71196117 | 7.36883396  | -7.20718153 |
| C  | 0.64238730  | -4.03523705 | 3.10095144  | H | -6.07446573 | 6.60887797  | -7.02677761 |
| H  | 0.28979213  | -3.17627251 | 3.67956500  | H | -6.68075303 | 4.86372387  | -5.35985339 |
| H  | 0.83916284  | -4.88287767 | 3.75835927  | H | -4.94703174 | 3.88859036  | -3.89523453 |
| C  | -0.28210093 | -4.36744056 | 1.92457225  | C | 3.32644400  | 1.84430271  | 4.10679056  |
| H  | -1.31338985 | -4.06383030 | 2.11811287  | H | 3.98833360  | 1.64375929  | 4.95970592  |
| N  | 0.29868188  | -3.48779868 | 0.89960133  | H | 3.85779343  | 2.55437463  | 3.46677069  |
| C  | -0.42951179 | -2.93396175 | -0.22670589 | C | 2.03507475  | 2.46758824  | 4.59071825  |
| C  | -1.58962902 | -3.51306422 | -0.61497172 | C | 1.63137114  | 2.35463825  | 5.92787246  |
| C  | -2.44650780 | -2.96492025 | -1.72406874 | C | 0.43453407  | 2.92317978  | 6.36694327  |
| H  | -2.39445369 | -1.87080114 | -1.78073969 | C | -0.37837431 | 3.61838011  | 5.47132229  |
| H  | -2.16391030 | -3.35247264 | -2.71528466 | C | 0.01754474  | 3.74871394  | 4.13839016  |
| H  | -3.50018829 | -3.22708096 | -1.57058009 | C | 1.21540686  | 3.18176551  | 3.70287015  |
| H  | -1.92146240 | -4.42685102 | -0.13735196 | H | 1.52311115  | 3.29660402  | 2.66647921  |
| O  | 0.10745189  | -1.85154012 | -0.74380530 | H | -0.60412635 | 4.29701291  | 3.43561711  |
| C  | -0.21934411 | -5.86457803 | 1.52546649  | H | -1.31053469 | 4.06221548  | 5.81040796  |
| H  | -0.67956097 | -5.98204870 | 0.53947201  | H | 0.14086640  | 2.82589022  | 7.40890901  |
| H  | 0.83546271  | -6.14444563 | 1.41482335  | H | 2.26617602  | 1.82667188  | 6.63698233  |
| C  | -0.89574915 | -6.76737888 | 2.53527464  |   |             |             |             |
| C  | -0.14783387 | -7.58159975 | 3.39621336  |   |             |             |             |
| C  | -0.77562379 | -8.39588797 | 4.34147672  |   |             |             |             |
| C  | -2.16692970 | -8.40718045 | 4.44117447  |   |             |             |             |
| C  | -2.92556148 | -7.60256720 | 3.58762981  |   |             |             |             |
| C  | -2.29466474 | -6.79220938 | 2.64443602  |   |             |             |             |
| H  | -2.89585652 | -6.17648166 | 1.97840309  |   |             |             |             |
| H  | -4.01039066 | -7.60954720 | 3.65349266  |   |             |             |             |
| H  | -2.65798285 | -9.04089709 | 5.17467872  |   |             |             |             |
| H  | -0.17618863 | -9.02312141 | 4.99610882  |   |             |             |             |
| H  | 0.93731670  | -7.58697907 | 3.31700307  |   |             |             |             |
| C  | 3.08848239  | -1.84352170 | -7.07867600 |   |             |             |             |
| H  | 3.52522479  | -1.46694662 | -8.01314308 |   |             |             |             |
| H  | 3.90061567  | -2.33790231 | -6.53813405 |   |             |             |             |
| C  | 1.99971230  | -2.84876529 | -7.38587567 |   |             |             |             |
| C  | 1.39296970  | -2.89817868 | -8.64807137 |   |             |             |             |
| C  | 0.38241242  | -3.82094751 | -8.92323591 |   |             |             |             |
| C  | -0.03606692 | -4.71354003 | -7.93611004 |   |             |             |             |
| C  | 0.56816950  | -4.68316579 | -6.67737120 |   |             |             |             |
| C  | 1.57967297  | -3.76167261 | -6.40590449 |   |             |             |             |
| H  | 2.05355824  | -3.75092519 | -5.42748951 |   |             |             |             |
| H  | 0.25589155  | -5.38118221 | -5.90519611 |   |             |             |             |
| H  | -0.82240822 | -5.43314494 | -8.14759130 |   |             |             |             |
| H  | -0.07362597 | -3.84413160 | -9.90958802 |   |             |             |             |

**Table 39.** Geometric coordinates and thermally corrected MP2 energies for 5 S<sub>4</sub> tetramer

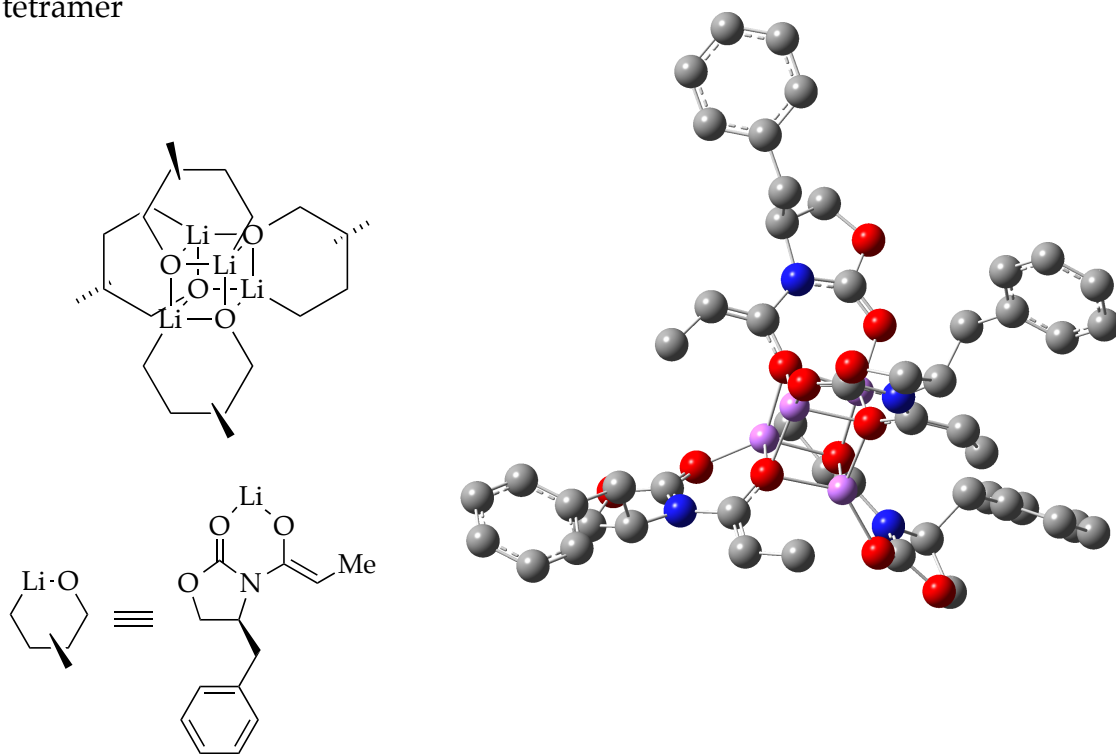

G = - 3166.66637 Hartree

G<sub>MP2</sub> = -1980924.053 kcal/mol

ΔG<sub>MP2</sub> = 2.060914038 kcal/mol Li vs. 5 spirocyclic dimer with three THF

| Atom | X           | Y           | Z           | Atom | X            | Y           | Z           |
|------|-------------|-------------|-------------|------|--------------|-------------|-------------|
| C    | 0.00000000  | 0.00000000  | 0.00000000  | Li   | -6.08024768  | -0.33358165 | -1.75858171 |
| H    | 0.00000000  | 0.00000000  | 1.09545220  | O    | -7.18504687  | -0.53093955 | -0.23339699 |
| H    | 1.02940245  | 0.00000000  | -0.36155046 | C    | -7.86452798  | 0.40186683  | 0.18511489  |
| C    | -0.85358200 | -1.14028366 | -0.58071920 | O    | -8.96551594  | 0.15902924  | 0.94358691  |
| H    | -0.99117400 | -1.92370996 | 0.16798276  | C    | -9.44592336  | 1.40412810  | 1.48387871  |
| N    | -2.11755103 | -0.42884150 | -0.81837010 | H    | -9.09878617  | 1.48615128  | 2.51963196  |
| C    | -1.92354790 | 0.92138729  | -0.80196390 | H    | -10.53676351 | 1.38962556  | 1.46823563  |
| O    | -0.64201997 | 1.20691152  | -0.45183666 | C    | -8.83430757  | 2.48721961  | 0.57893825  |
| O    | -2.71197332 | 1.82843814  | -1.05221038 | H    | -8.47615380  | 3.32278477  | 1.18457669  |
| Li   | -4.24039960 | 1.53089789  | -2.12975726 | N    | -7.70217586  | 1.74461473  | 0.00704132  |
| O    | -4.12947756 | -0.42356407 | -2.01640366 | C    | -6.65814419  | 2.36831676  | -0.79028964 |
| C    | -3.35272068 | -1.09771088 | -1.19483725 | O    | -6.17334715  | 1.62505593  | -1.76257427 |
| C    | -3.58574006 | -2.33924197 | -0.71197270 | Li   | -6.37919715  | 1.46176276  | -3.68871290 |
| H    | -2.90648903 | -2.76141619 | 0.02119815  | O    | -6.85557812  | 2.77549953  | -4.93471900 |
| C    | -4.78251431 | -3.16188089 | -1.10491242 | C    | -6.04459983  | 3.32709732  | -5.67199006 |
| H    | -5.62800790 | -3.03845102 | -0.41179186 | O    | -6.47707039  | 4.26537336  | -6.55624420 |
| H    | -5.13915771 | -2.89213943 | -2.10633590 | C    | -5.33436454  | 4.91181100  | -7.14416487 |
| H    | -4.53634441 | -4.23100042 | -1.12216654 | H    | -5.14541115  | 5.84505539  | -6.60178122 |

|    |              |             |              |   |              |             |              |
|----|--------------|-------------|--------------|---|--------------|-------------|--------------|
| H  | -5.56181642  | 5.13558281  | -8.18724113  | C | -1.46074938  | 4.68892493  | -10.46137135 |
| C  | -4.20022829  | 3.89662159  | -6.96702583  | C | -2.02746148  | 4.00441367  | -9.38680348  |
| H  | -3.26537404  | 4.40746276  | -6.72678704  | H | -1.40007239  | 3.70519091  | -8.54958060  |
| N  | -4.69122053  | 3.15864337  | -5.79160781  | H | -0.39987965  | 4.92509396  | -10.45166294 |
| C  | -3.84785057  | 2.28026495  | -4.99329293  | H | -1.81034251  | 5.59415784  | -12.38947096 |
| O  | -4.48019396  | 1.55050226  | -4.10168505  | C | -6.29943984  | 3.63965040  | -0.50064109  |
| Li | -4.54607395  | -0.40739784 | -3.91517633  | H | -6.71663244  | 4.12387998  | 0.37606905   |
| O  | -4.47279337  | -1.81631146 | -5.14601389  | C | -5.29890252  | 4.41585459  | -1.31295061  |
| C  | -5.46871862  | -2.41164983 | -5.54504032  | H | -4.27592916  | 4.33432987  | -0.91622528  |
| O  | -5.32712324  | -3.41865953 | -6.44791670  | H | -5.27467565  | 4.06754762  | -2.35261410  |
| C  | -6.58920907  | -4.09338187 | -6.59353030  | H | -5.55083264  | 5.48361148  | -1.33132770  |
| H  | -6.58524464  | -4.98100690 | -5.95093198  | C | -9.78605657  | 3.02008279  | -0.51726444  |
| H  | -6.70108377  | -4.39740309 | -7.63510066  | H | -9.17756208  | 3.59784607  | -1.22195347  |
| C  | -7.62117671  | -3.05405978 | -6.14287501  | H | -10.19909086 | 2.16641196  | -1.06780431  |
| H  | -8.42553852  | -3.53406877 | -5.58143379  | C | -10.89863653 | 3.87676640  | 0.04573207   |
| N  | -6.79227132  | -2.23619947 | -5.24213779  | C | -10.63543140 | 5.18371764  | 0.48382881   |
| C  | -7.35008585  | -1.29032425 | -4.28595020  | H | -9.63101118  | 5.58936182  | 0.38017454   |
| O  | -6.47688147  | -0.50365855 | -3.69768749  | C | -11.64526978 | 5.97182233  | 1.03465190   |
| C  | -8.68962156  | -1.29217933 | -4.07691819  | H | -11.42175686 | 6.98342657  | 1.36343061   |
| H  | -9.31774094  | -2.00780700 | -4.59297540  | C | -12.94190866 | 5.46640524  | 1.15626546   |
| C  | -9.38665076  | -0.35319348 | -3.13292598  | C | -13.21948944 | 4.17092514  | 0.71946421   |
| H  | -8.72097912  | 0.44868780  | -2.79964055  | C | -12.20472562 | 3.38447916  | 0.16956955   |
| H  | -10.25748170 | 0.11680432  | -3.61088737  | H | -12.43230364 | 2.37992908  | -0.18103266  |
| H  | -9.75388025  | -0.86595909 | -2.23141700  | H | -14.22694277 | 3.77137947  | 0.80154873   |
| C  | -8.20664497  | -2.21643042 | -7.30664954  | H | -13.73031342 | 6.08082200  | 1.58256673   |
| H  | -8.71929823  | -1.35344385 | -6.86952107  | C | -0.29177331  | -1.76534169 | -1.87883656  |
| H  | -7.37188889  | -1.82855937 | -7.90330938  | H | -1.08511123  | -2.38677852 | -2.30906107  |
| C  | -9.15221575  | -3.01041265 | -8.18127328  | H | -0.08487279  | -0.96041387 | -2.59418737  |
| C  | -10.44698229 | -3.31607752 | -7.73479886  | C | 0.95220182   | -2.59099055 | -1.63484050  |
| H  | -10.78052641 | -2.94733858 | -6.76687654  | C | 0.85728366   | -3.85812758 | -1.03928670  |
| C  | -11.31648153 | -4.07211920 | -8.52015497  | H | -0.12321517  | -4.25807082 | -0.78865415  |
| H  | -12.31673576 | -4.29387201 | -8.15734458  | C | 1.99912437   | -4.61505227 | -0.77938114  |
| C  | -10.90669693 | -4.53669234 | -9.77214591  | H | 1.90361911   | -5.59637007 | -0.32189761  |
| C  | -9.62438710  | -4.23584275 | -10.23177430 | C | 3.26124070   | -4.11785664 | -1.11309685  |
| C  | -8.75642273  | -3.47939412 | -9.44123182  | C | 3.37034293   | -2.86223909 | -1.71112160  |
| H  | -7.76259155  | -3.23820664 | -9.81287481  | C | 2.22414474   | -2.10683535 | -1.96846409  |
| H  | -9.29836617  | -4.58529812 | -11.20792416 | H | 2.31667492   | -1.13423757 | -2.44734382  |
| H  | -11.58452435 | -5.12338746 | -10.38622502 | H | 4.34695827   | -2.47002957 | -1.98265494  |
| C  | -2.51118158  | 2.28145896  | -5.21992913  | H | 4.15150830   | -4.70821329 | -0.91378454  |
| H  | -2.08756119  | 2.94878514  | -5.96033062  |   |              |             |              |
| C  | -1.53972390  | 1.40734166  | -4.47772865  |   |              |             |              |
| H  | -2.05576138  | 0.64035666  | -3.89235789  |   |              |             |              |
| H  | -0.85894272  | 0.89288512  | -5.17022559  |   |              |             |              |
| H  | -0.91268496  | 1.98150836  | -3.77939976  |   |              |             |              |
| C  | -4.00326064  | 2.96715149  | -8.19016038  |   |              |             |              |
| H  | -3.36804649  | 2.13315679  | -7.87457087  |   |              |             |              |
| H  | -4.97920116  | 2.54586537  | -8.46094090  |   |              |             |              |
| C  | -3.39312863  | 3.68187551  | -9.37607191  |   |              |             |              |
| C  | -4.17326036  | 4.05993362  | -10.47723228 |   |              |             |              |
| H  | -5.23059705  | 3.80364708  | -10.49586884 |   |              |             |              |
| C  | -3.60965066  | 4.74447917  | -11.55624892 |   |              |             |              |
| H  | -4.23227030  | 5.02376569  | -12.40219256 |   |              |             |              |
| C  | -2.25157533  | 5.06335513  | -11.55023574 |   |              |             |              |



**Table 40.** Geometric coordinates and thermally corrected MP2 energies for 5  $D_{2d}$  tetramer with one THF

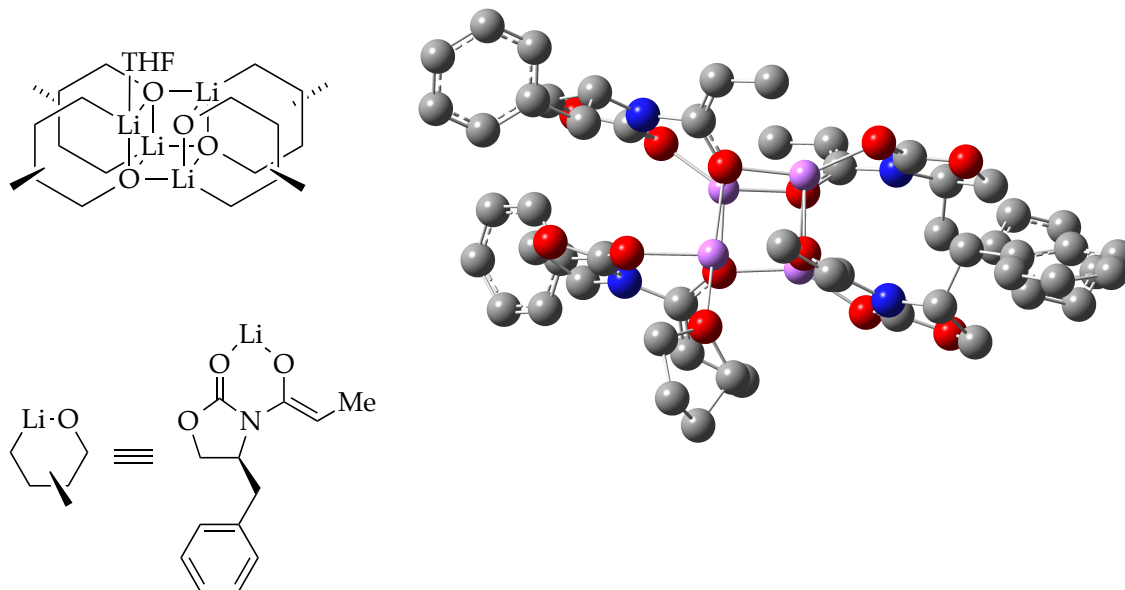

$G = -3399.01452$  Hartree

$G_{MP2} = -2126253.179$  kcal/mol

$\Delta G_{MP2} = -2.148099694$  kcal/mol Li vs. 5 spirocyclic dimer with three THF

| Atom | X           | Y          | Z           | Atom | X           | Y           | Z           |
|------|-------------|------------|-------------|------|-------------|-------------|-------------|
| Li   | 0.00000000  | 0.00000000 | 0.00000000  | O    | -5.63036611 | 2.28873669  | 2.48291072  |
| Li   | 0.00000000  | 0.00000000 | 2.73154670  | C    | -6.34514490 | 1.73226371  | 3.60255504  |
| O    | 2.07881221  | 0.00000000 | 2.76560556  | H    | -7.37396998 | 1.53839137  | 3.29613405  |
| C    | 2.72496736  | 0.72180885 | 2.01580723  | H    | -6.34140182 | 2.47045674  | 4.41204035  |
| O    | 4.03478483  | 0.46077342 | 1.75053272  | C    | -5.56795218 | 0.45708472  | 3.96972267  |
| C    | 4.50875161  | 1.36504314 | 0.72954873  | N    | -4.26040084 | 0.75004329  | 3.35569038  |
| H    | 4.63721890  | 0.78956781 | -0.19076588 | C    | -3.07519606 | -0.09002879 | 3.54900856  |
| H    | 5.47238027  | 1.76544979 | 1.04935389  | O    | -2.17621677 | -0.01710421 | 2.60159350  |
| C    | 3.41433787  | 2.44788571 | 0.58663850  | Li   | -2.08766237 | -1.20230465 | 1.03939044  |
| N    | 2.32037779  | 1.83625754 | 1.35047463  | O    | -3.83222521 | -1.75848754 | 0.38502665  |
| C    | 0.97254944  | 2.37368842 | 1.45608980  | C    | -4.49867208 | -0.92925447 | -0.22902539 |
| C    | 0.84389441  | 3.71204078 | 1.60680139  | O    | -5.85638533 | -0.91082824 | -0.13251324 |
| H    | 1.75122098  | 4.29800436 | 1.72920333  | C    | -6.36096590 | 0.25960957  | -0.81033563 |
| C    | -0.45794729 | 4.46231211 | 1.60558134  | H    | -6.64856599 | 0.99445253  | -0.05130710 |
| H    | -0.72601158 | 4.84110819 | 2.60369814  | H    | -7.24031236 | -0.03049698 | -1.38684121 |
| H    | -0.41170041 | 5.33811398 | 0.94371275  | C    | -5.19344348 | 0.77062837  | -1.67921834 |
| H    | -1.29166057 | 3.84122069 | 1.26507697  | N    | -4.07115491 | 0.05556771  | -1.05955319 |
| O    | 0.02407663  | 1.46852557 | 1.35313362  | C    | -2.66751789 | 0.25927485  | -1.37892669 |
| Li   | -1.90306781 | 1.37383436 | 1.27832316  | C    | -2.33069475 | 0.47268145  | -2.66904254 |
| O    | -3.52300525 | 2.27803840 | 1.72635271  | H    | -3.10412965 | 0.38261546  | -3.42674469 |
| C    | -4.36288144 | 1.78334179 | 2.47534698  | C    | -0.93601223 | 0.80140295  | -3.12383028 |

|   |             |             |             |   |              |             |             |
|---|-------------|-------------|-------------|---|--------------|-------------|-------------|
| H | -0.35015685 | -0.09231056 | -3.38375073 | H | -2.37857896  | -2.86962742 | 5.13988371  |
| H | -0.95342778 | 1.44414888  | -4.01276120 | H | -1.26287955  | -1.96228239 | 4.11133395  |
| H | -0.37659356 | 1.33330696  | -2.34496533 | H | -1.37217835  | -1.60293173 | 5.84017019  |
| O | -1.87455831 | 0.24771531  | -0.33048378 | C | -6.20149252  | -0.84751445 | 3.43351000  |
| C | -5.03130860 | 2.30208238  | -1.64922751 | H | -6.36241684  | -0.75128929 | 2.35452656  |
| H | -4.81226670 | 2.60332485  | -0.61902139 | H | -5.47058213  | -1.65052655 | 3.57134286  |
| H | -4.15444636 | 2.56007723  | -2.25257093 | C | -7.49796883  | -1.18108737 | 4.13921849  |
| C | -6.26302405 | 3.01899819  | -2.16074352 | C | -8.73521524  | -1.01511224 | 3.50230582  |
| C | -6.57765610 | 3.02596774  | -3.52827494 | C | -9.93077949  | -1.29673974 | 4.16725490  |
| C | -7.72611455 | 3.66431208  | -3.99610823 | C | -9.90777334  | -1.74992189 | 5.48635470  |
| C | -8.58141976 | 4.31286936  | -3.10230827 | C | -8.68189393  | -1.92559503 | 6.13275275  |
| C | -8.27721087 | 4.31939555  | -1.74054940 | C | -7.49092876  | -1.64458495 | 5.46413202  |
| C | -7.12791496 | 3.67700865  | -1.27498757 | H | -6.54068730  | -1.79916930 | 5.97148819  |
| H | -6.88906774 | 3.69385528  | -0.21374237 | H | -8.65338789  | -2.28853041 | 7.15695964  |
| H | -8.93169730 | 4.82920634  | -1.03812431 | H | -10.83633350 | -1.97151430 | 6.00551576  |
| H | -9.47414166 | 4.81438761  | -3.46637829 | H | -10.87861267 | -1.16614986 | 3.65150456  |
| H | -7.94997382 | 3.66166670  | -5.05981305 | H | -8.76066846  | -0.67715210 | 2.46855770  |
| H | -5.90995467 | 2.53646336  | -4.23453901 | H | -5.46274888  | 0.39062678  | 5.05536057  |
| H | -5.31809821 | 0.43743582  | -2.71875485 | C | 3.03679021   | 2.74389669  | -0.87744514 |
| O | -0.19169042 | -1.52872183 | 1.23483659  | H | 2.70567681   | 1.80748904  | -1.33974065 |
| C | 0.43663839  | -2.64608542 | 0.94717560  | H | 2.18008283   | 3.42685605  | -0.86991298 |
| N | 1.82392001  | -2.48106259 | 0.52997527  | C | 4.18657699   | 3.34635538  | -1.65728323 |
| C | 2.23246277  | -1.53460567 | -0.34726006 | C | 4.58422628   | 4.67428660  | -1.43803107 |
| O | 1.57126455  | -0.64930363 | -0.89235558 | C | 5.65748588   | 5.22631645  | -2.13687140 |
| O | 3.56094653  | -1.65152938 | -0.60050229 | C | 6.35359408   | 4.45865188  | -3.07356870 |
| C | 4.12835574  | -2.64138481 | 0.28427509  | C | 5.96533845   | 3.13898408  | -3.30630821 |
| H | 4.72182514  | -2.11410311 | 1.03573434  | C | 4.89158938   | 2.58897722  | -2.60277499 |
| H | 4.77499901  | -3.29419697 | -0.30402666 | H | 4.58743303   | 1.56301260  | -2.79783772 |
| C | 2.92338102  | -3.37564540 | 0.91370290  | H | 6.49455937   | 2.53575124  | -4.03945762 |
| H | 2.78467411  | -4.35640944 | 0.44028396  | H | 7.18736473   | 4.88896477  | -3.62189110 |
| C | 3.04475093  | -3.55886065 | 2.43846083  | H | 5.94617449   | 6.25854240  | -1.95579164 |
| C | 4.20943623  | -4.44900320 | 2.81725713  | H | 4.03836601   | 5.28507959  | -0.72162548 |
| C | 5.38040405  | -3.91096754 | 3.36842961  | H | 3.73317188   | 3.37967761  | 1.07252450  |
| C | 6.46357806  | -4.73061849 | 3.69300049  | O | 0.04190953   | 0.75659509  | 4.65626579  |
| C | 6.39302682  | -6.10599122 | 3.46968445  | C | 1.00575978   | 0.43079599  | 5.67628466  |
| C | 5.23057342  | -6.65672535 | 2.92498897  | H | 0.92843760   | -0.64036959 | 5.88619581  |
| C | 4.15036766  | -5.83502801 | 2.60428751  | H | 2.01291093   | 0.63883762  | 5.29649260  |
| H | 3.24378291  | -6.27440126 | 2.19306929  | C | 0.65018497   | 1.31707699  | 6.87086654  |
| H | 5.16282756  | -7.72835177 | 2.75592114  | H | -0.14419418  | 0.85415303  | 7.46854426  |
| H | 7.23411169  | -6.74569348 | 3.72338274  | H | 1.50701438   | 1.50235542  | 7.52613468  |
| H | 7.36059387  | -4.29340207 | 4.12403458  | C | 0.12804864   | 2.58294896  | 6.17425522  |
| H | 5.43785975  | -2.84081548 | 3.55453026  | C | -0.61869521  | 2.00420187  | 4.96784063  |
| H | 2.10177487  | -3.98587885 | 2.79645064  | H | -0.57239496  | 2.64681031  | 4.08440018  |
| H | 3.14506209  | -2.56713062 | 2.89261892  | H | -1.66708170  | 1.78352323  | 5.19965878  |
| C | -0.04638822 | -3.90747019 | 1.02040920  | H | 0.96672358   | 3.20665473  | 5.84277815  |
| C | -1.42587627 | -4.25058978 | 1.51098092  | H | -0.51859627  | 3.19520832  | 6.81045341  |
| H | -2.16057604 | -4.33568038 | 0.69664672  |   |              |             |             |
| H | -1.42824662 | -5.21058106 | 2.04283138  |   |              |             |             |
| H | -1.80481439 | -3.49489262 | 2.20872303  |   |              |             |             |
| H | 0.58282946  | -4.72438785 | 0.67893129  |   |              |             |             |
| C | -3.04060018 | -0.87137059 | 4.65696272  |   |              |             |             |
| H | -3.84004417 | -0.79679063 | 5.38594764  |   |              |             |             |
| C | -1.95906705 | -1.87110076 | 4.94954673  |   |              |             |             |

**Table 41.** Geometric coordinates and thermally corrected MP2 energies for 5 D<sub>2d</sub> tetramer 1 pyridine

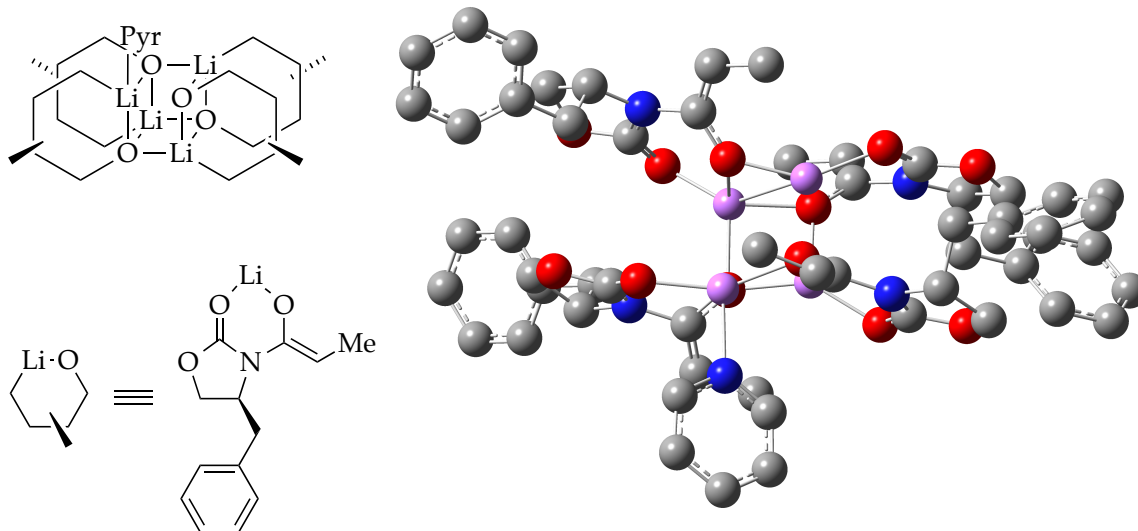

G = -3414.881206 Hartree

G<sub>MP2</sub> = -2136193.804 kcal/mol

ΔG<sub>MP2</sub> = -2.338561749 kcal/mol Li vs. 5 spirocyclic dimer with three THF

| Atom | X           | Y           | Z          | Atom | X           | Y           | Z           |
|------|-------------|-------------|------------|------|-------------|-------------|-------------|
| Li   | 0.00000000  | 0.00000000  | 0.00000000 | H    | -7.06176862 | -1.05802231 | 3.60412764  |
| Li   | 0.00000000  | 0.00000000  | 3.05734620 | H    | -6.45399628 | -0.09239081 | 4.97166948  |
| O    | 1.96747092  | 0.00000000  | 3.03044663 | C    | -5.00384188 | -1.57967664 | 4.22277030  |
| C    | 2.57488810  | 0.80625885  | 2.33047955 | N    | -3.89189931 | -0.80115973 | 3.65128901  |
| O    | 3.91359876  | 0.68434761  | 2.13628182 | C    | -2.50314443 | -1.24482277 | 3.67085732  |
| C    | 4.34795165  | 1.67490571  | 1.17770175 | O    | -1.76104653 | -0.79588638 | 2.68327490  |
| H    | 4.53761309  | 1.16393206  | 0.23055609 | Li   | -1.70765001 | -1.70832491 | 0.88299419  |
| H    | 5.27090694  | 2.12405505  | 1.54720121 | O    | -3.45462526 | -2.40967589 | 0.37639176  |
| C    | 3.18114997  | 2.67854470  | 1.06243181 | C    | -4.30675164 | -1.64268784 | -0.06400284 |
| N    | 2.09617004  | 1.89721511  | 1.67392974 | O    | -5.63252828 | -1.88536725 | 0.13389854  |
| C    | 0.69510501  | 2.28186244  | 1.70375889 | C    | -6.39688589 | -0.75488797 | -0.33814043 |
| C    | 0.38916477  | 3.59157016  | 1.83473182 | H    | -6.75176324 | -0.19841610 | 0.53481276  |
| H    | 1.19864906  | 4.29681969  | 2.00149934 | H    | -7.25094298 | -1.13117227 | -0.90306708 |
| C    | -1.01022759 | 4.13699739  | 1.78215731 | C    | -5.41719162 | 0.08264218  | -1.18781319 |
| H    | -1.42925580 | 4.32445487  | 2.78251505 | N    | -4.13606746 | -0.49715681 | -0.76911575 |
| H    | -1.04532427 | 5.09147635  | 1.24122082 | C    | -2.82173093 | 0.00054106  | -1.15219213 |
| H    | -1.69058486 | 3.44689525  | 1.27121668 | C    | -2.65047848 | 0.42374287  | -2.42313747 |
| O    | -0.13572218 | 1.26932460  | 1.56554666 | H    | -3.46558266 | 0.28067827  | -3.12754394 |
| Li   | -2.01709633 | 0.81292114  | 1.57596764 | C    | -1.38570254 | 1.05309336  | -2.93557234 |
| O    | -3.71150600 | 1.18968665  | 2.42148104 | H    | -0.72245026 | 0.32833142  | -3.43003706 |
| C    | -4.33955744 | 0.31673691  | 3.02138903 | H    | -1.60487695 | 1.83862243  | -3.67020289 |
| O    | -5.69343746 | 0.41097086  | 3.12200874 | H    | -0.80895532 | 1.51120715  | -2.12446743 |
| C    | -6.17583021 | -0.59219926 | 4.03838184 | O    | -1.95033147 | 0.00991585  | -0.16957961 |

|   |              |             |             |   |             |             |             |
|---|--------------|-------------|-------------|---|-------------|-------------|-------------|
| C | -5.51386749  | 1.59662118  | -0.92057187 | H | -5.40452067 | -2.77414664 | 2.46341393  |
| H | -5.28165802  | 1.77390652  | 0.13564007  | H | -4.26163502 | -3.49231609 | 3.59102682  |
| H | -4.73424261  | 2.09038502  | -1.51050607 | C | -6.33014333 | -3.74017175 | 4.15373462  |
| C | -6.87912180  | 2.15305256  | -1.26537089 | C | -7.54623051 | -3.92179915 | 3.48087019  |
| C | -7.27229417  | 2.31839592  | -2.60225545 | C | -8.59266233 | -4.63727410 | 4.06720099  |
| C | -8.53959957  | 2.80543973  | -2.92157948 | C | -8.43924395 | -5.18353659 | 5.34162553  |
| C | -9.43866376  | 3.14049942  | -1.90637242 | C | -7.23085411 | -5.01539194 | 6.02211391  |
| C | -9.05871059  | 2.98705154  | -0.57270156 | C | -6.18792855 | -4.30203107 | 5.43203025  |
| C | -7.78978814  | 2.49708350  | -0.25670273 | H | -5.24528168 | -4.19134728 | 5.96449415  |
| H | -7.49497300  | 2.39039953  | 0.78502035  | H | -7.09822379 | -5.44680424 | 7.01099915  |
| H | -9.74776132  | 3.25333303  | 0.22473910  | H | -9.25118125 | -5.74221949 | 5.79940285  |
| H | -10.42482000 | 3.52395624  | -2.15422652 | H | -9.52495367 | -4.77134589 | 3.52465137  |
| H | -8.82314407  | 2.92995859  | -3.96351614 | H | -7.66436204 | -3.51218670 | 2.48009717  |
| H | -6.57396916  | 2.07403262  | -3.40023858 | H | -4.82667706 | -1.74260036 | 5.28977626  |
| H | -5.58015657  | -0.10756975 | -2.25734228 | C | 2.89232131  | 3.11100420  | -0.38762646 |
| O | 0.14425872   | -1.83120577 | 0.57739005  | H | 2.61693504  | 2.21945707  | -0.95976999 |
| C | 0.91655827   | -2.73399547 | 0.04863147  | H | 2.02003948  | 3.77271748  | -0.37702517 |
| N | 2.19485276   | -2.23623845 | -0.46645668 | C | 4.07936267  | 3.80783445  | -1.01919820 |
| C | 2.40035854   | -0.97734225 | -0.92158318 | C | 4.40396244  | 5.12949181  | -0.67755325 |
| O | 1.60066469   | -0.05539353 | -1.08144705 | C | 5.51161716  | 5.76435545  | -1.23924268 |
| O | 3.72120184   | -0.78733518 | -1.21746342 | C | 6.31608438  | 5.08704773  | -2.15847258 |
| C | 4.40310738   | -2.05543824 | -1.12325650 | C | 6.00174232  | 3.77420404  | -2.51176888 |
| H | 5.37954151   | -1.88985860 | -0.66543405 | C | 4.89298586  | 3.14093561  | -1.94629989 |
| H | 4.53709370   | -2.44697482 | -2.13742953 | H | 4.64738307  | 2.12024268  | -2.23103216 |
| C | 3.47127165   | -2.93972689 | -0.27643728 | H | 6.61658255  | 3.24168409  | -3.23292009 |
| H | 3.41792192   | -3.94399433 | -0.70339115 | H | 7.17686177  | 5.58192899  | -2.60036470 |
| C | 3.85472805   | -3.03681744 | 1.21841167  | H | 5.74297980  | 6.79047315  | -0.96485721 |
| C | 5.14242479   | -3.79928743 | 1.43819766  | H | 3.77462330  | 5.67026459  | 0.02668461  |
| C | 6.32217085   | -3.13369134 | 1.79848798  | H | 3.38290577  | 3.56929712  | 1.67401556  |
| C | 7.51747335   | -3.83453340 | 1.97393145  | N | -0.20921402 | 1.01504616  | 4.93927061  |
| C | 7.55202646   | -5.21702963 | 1.78982201  | C | -1.29807492 | 1.73839202  | 5.24266074  |
| C | 6.38251951   | -5.89427880 | 1.43574399  | H | -2.09107252 | 1.74162653  | 4.49947891  |
| C | 5.19072426   | -5.19094045 | 1.26329809  | C | -1.42780607 | 2.45772206  | 6.42989056  |
| H | 4.28124427   | -5.72788964 | 1.00119566  | H | -2.32944124 | 3.03146740  | 6.62124958  |
| H | 6.39753523   | -6.97267851 | 1.29991090  | C | -0.38148486 | 2.42118295  | 7.35084439  |
| H | 8.48061402   | -5.76462593 | 1.92728773  | C | 0.75365349  | 1.67194297  | 7.04444675  |
| H | 8.41977879   | -3.29952566 | 2.25907399  | C | 0.79631543  | 0.99150320  | 5.82775214  |
| H | 6.29672903   | -2.05776956 | 1.95798740  | H | 1.66624186  | 0.40927469  | 5.53614954  |
| H | 3.02086841   | -3.53163363 | 1.72877579  | H | 1.59499446  | 1.61544547  | 7.72835181  |
| H | 3.93242420   | -2.02522048 | 1.63224211  | H | -0.44828045 | 2.96823646  | 8.28755211  |
| C | 0.69697810   | -4.06878098 | -0.03656021 |   |             |             |             |
| C | -0.52691521  | -4.72710292 | 0.53771562  |   |             |             |             |
| H | -1.38218013  | -4.73209149 | -0.15542850 |   |             |             |             |
| H | -0.32523808  | -5.77245917 | 0.80282570  |   |             |             |             |
| H | -0.86209585  | -4.21914000 | 1.45154219  |   |             |             |             |
| H | 1.40628466   | -4.69155258 | -0.57201881 |   |             |             |             |
| C | -2.11131917  | -2.08179918 | 4.65966019  |   |             |             |             |
| H | -2.80900765  | -2.33415240 | 5.45151048  |   |             |             |             |
| C | -0.73630251  | -2.68475490 | 4.73523093  |   |             |             |             |
| H | -0.78414985  | -3.74907113 | 5.00122017  |   |             |             |             |
| H | -0.21509606  | -2.61087328 | 3.77463779  |   |             |             |             |
| H | -0.10359254  | -2.19956824 | 5.49428726  |   |             |             |             |
| C | -5.20672222  | -2.94349518 | 3.52594930  |   |             |             |             |

**Table 42.** Geometric coordinates and thermally corrected MP2 energies for 5 hexamer

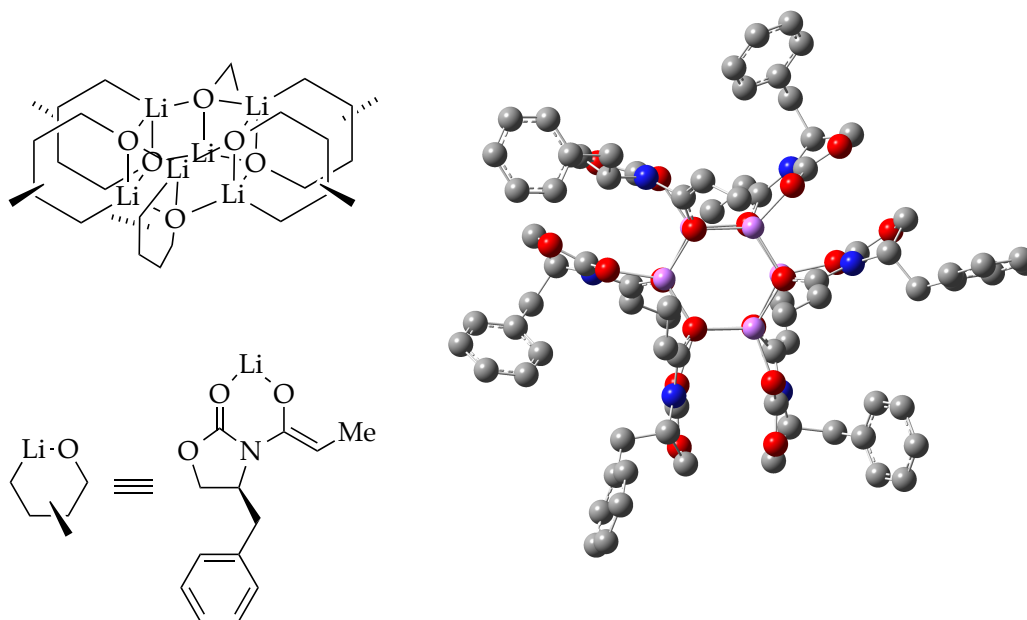

G = -4749.986807 Hartree

$G_{\text{MP2}} = -2971414.86$  kcal/mol

$\Delta G_{\text{MP2}} = -2.735898515$  kcal/mol Li vs. 5 spirocyclic dimer with three THF

| Atom | X          | Y           | Z           | Atom | X           | Y           | Z           |
|------|------------|-------------|-------------|------|-------------|-------------|-------------|
| Li   | 0.00000000 | 0.00000000  | 0.00000000  | O    | 0.36159619  | 5.48288395  | -1.41053305 |
| O    | 0.00000000 | 0.00000000  | 1.91383380  | C    | -1.01399171 | 5.87040688  | -1.63926229 |
| C    | 1.02658669 | 0.00000000  | 2.58753598  | H    | -1.20917188 | 5.80796285  | -2.71312398 |
| O    | 0.99089934 | -0.42959575 | 3.87686383  | H    | -1.14143554 | 6.89429807  | -1.28586302 |
| C    | 2.34094063 | -0.51115690 | 4.37604326  | C    | -1.81200647 | 4.83798982  | -0.83693342 |
| H    | 2.67123224 | -1.55130792 | 4.29790588  | H    | -2.74388022 | 4.56791380  | -1.33871304 |
| H    | 2.32914672 | -0.19237805 | 5.41933476  | N    | -0.88091382 | 3.70096737  | -0.89646097 |
| C    | 3.14096643 | 0.42258204  | 3.45597227  | C    | -1.27574256 | 2.30814313  | -0.79349364 |
| H    | 4.11666635 | -0.00532353 | 3.20926739  | C    | -2.49814426 | 2.01566723  | -0.28779291 |
| N    | 2.29288256 | 0.38348297  | 2.25445409  | H    | -3.12820894 | 2.81898520  | 0.07466458  |
| C    | 2.76251888 | 0.66116617  | 0.90609503  | C    | -3.05700436 | 0.62632032  | -0.16175071 |
| C    | 3.94636659 | 1.30177390  | 0.75445529  | H    | -2.41794709 | -0.11857422 | -0.64465610 |
| H    | 4.49393378 | 1.61807621  | 1.63270337  | H    | -3.17291404 | 0.32971017  | 0.89149180  |
| C    | 4.57289291 | 1.64450750  | -0.56688848 | H    | -4.05111470 | 0.54793131  | -0.62348312 |
| H    | 4.64309714 | 2.73264120  | -0.70755212 | O    | -0.38768698 | 1.44333219  | -1.24788352 |
| H    | 5.59443184 | 1.24691798  | -0.64586094 | Li   | -0.15515047 | 1.13950931  | -3.19584372 |
| H    | 4.00768571 | 1.24215067  | -1.41097227 | O    | -0.39014394 | 2.79673943  | -4.11625529 |
| O    | 1.97528127 | 0.22576418  | -0.06185575 | C    | 0.54506604  | 3.54830204  | -4.36948237 |
| Li   | 1.57887192 | 1.65980822  | -1.36004135 | O    | 0.31756367  | 4.87685176  | -4.55532319 |
| O    | 1.45880387 | 3.55568679  | -1.06152289 | C    | 1.58553069  | 5.55759773  | -4.64185087 |
| C    | 0.38773692 | 4.15266625  | -1.11388524 | H    | 1.80948567  | 5.98470930  | -3.65982384 |

|    |             |             |              |    |             |             |             |
|----|-------------|-------------|--------------|----|-------------|-------------|-------------|
| H  | 1.48807027  | 6.34798668  | -5.38775742  | H  | 1.43327270  | 2.18451253  | -7.18935602 |
| C  | 2.57881523  | 4.45547782  | -5.03915022  | H  | -0.56136132 | 2.00474804  | -8.63888012 |
| H  | 3.52631136  | 4.56358006  | -4.50390662  | H  | -1.46981214 | 4.02170310  | -9.77703346 |
| N  | 1.87487166  | 3.27570255  | -4.51493945  | H  | -0.35350635 | 6.22271059  | -9.45499752 |
| C  | 2.52988847  | 2.04189148  | -4.11200829  | H  | 1.63841977  | 6.40097603  | -8.00157255 |
| C  | 3.77819956  | 1.79422518  | -4.57590433  | C  | -2.08908402 | 5.30688990  | 0.61578987  |
| H  | 4.23367405  | 2.49192610  | -5.26701699  | H  | -2.40768199 | 4.44290944  | 1.20728989  |
| C  | 4.59953108  | 0.58599311  | -4.22732821  | H  | -1.14147824 | 5.65428707  | 1.04631881  |
| H  | 4.76530317  | -0.05682101 | -5.10346368  | C  | -3.12637784 | 6.40739082  | 0.68752988  |
| H  | 5.59104493  | 0.86878363  | -3.84637775  | C  | -4.48230042 | 6.12501497  | 0.46117742  |
| H  | 4.12608548  | -0.02915037 | -3.45831674  | C  | -5.44122994 | 7.13656799  | 0.50087703  |
| O  | 1.83398676  | 1.27836993  | -3.28723193  | C  | -5.06147202 | 8.45355412  | 0.77059737  |
| Li | 1.75432911  | -0.58356078 | -3.89020013  | C  | -3.71793426 | 8.74845570  | 1.00226649  |
| O  | 1.89121407  | -1.26784856 | -5.66969668  | C  | -2.76062757 | 7.73240723  | 0.96005324  |
| C  | 0.92706970  | -1.75969982 | -6.24712464  | H  | -1.71618171 | 7.96893361  | 1.15246310  |
| O  | 1.12176198  | -2.66576003 | -7.24709388  | H  | -3.41236179 | 9.76857509  | 1.21971299  |
| C  | -0.15970107 | -3.23431424 | -7.60350448  | H  | -5.80862030 | 9.24186619  | 0.80399533  |
| H  | -0.28542718 | -4.16666290 | -7.04607418  | H  | -6.48651812 | 6.89594714  | 0.32555509  |
| H  | -0.15869145 | -3.42938524 | -8.67676032  | H  | -4.79094906 | 5.10131230  | 0.25922629  |
| C  | -1.15989283 | -2.15558374 | -7.17604525  | C  | 3.35880615  | 1.83722302  | 4.06348253  |
| H  | -2.08169302 | -2.59190907 | -6.78499075  | H  | 4.03967885  | 1.70336855  | 4.91452203  |
| N  | -0.40729945 | -1.53576815 | -6.07592013  | H  | 3.89082722  | 2.45338105  | 3.33382069  |
| C  | -1.01550038 | -0.83271089 | -4.96172376  | C  | 2.11066377  | 2.56130131  | 4.52060295  |
| C  | -2.31263299 | -0.45544754 | -5.06425132  | C  | 1.28231371  | 3.21523616  | 3.59540878  |
| C  | -3.07646987 | 0.24336599  | -3.97591906  | C  | 0.12761004  | 3.87494850  | 4.01731460  |
| H  | -2.52994475 | 0.23927816  | -3.02898138  | C  | -0.21495058 | 3.90175623  | 5.37078492  |
| H  | -3.28449585 | 1.29307979  | -4.22973655  | C  | 0.60807439  | 3.26791450  | 6.30192226  |
| H  | -4.04669779 | -0.23870540 | -3.79195697  | C  | 1.76080374  | 2.60552739  | 5.87721530  |
| H  | -2.84779178 | -0.63248842 | -5.98942433  | H  | 2.40591932  | 2.12753018  | 6.61208136  |
| O  | -0.23024163 | -0.65579387 | -3.91463471  | H  | 0.35733755  | 3.29211464  | 7.35926723  |
| C  | -1.47045665 | -1.14999522 | -8.31579612  | H  | -1.11300139 | 4.41939207  | 5.69721826  |
| H  | -1.95539740 | -0.27133149 | -7.87876242  | H  | -0.50337457 | 4.37288271  | 3.28615183  |
| H  | -0.51578506 | -0.80928249 | -8.73575041  | H  | 1.54797582  | 3.21232418  | 2.54114961  |
| C  | -2.33591297 | -1.74392930 | -9.40653850  | Li | 0.12464572  | -2.14380758 | -2.64959758 |
| C  | -1.79821801 | -2.08657752 | -10.65442911 | O  | 0.19841623  | -3.72845966 | -3.71769720 |
| C  | -2.59666547 | -2.65434931 | -11.64979380 | C  | 1.23909551  | -4.24228097 | -4.11122203 |
| C  | -3.95062087 | -2.89013015 | -11.41074104 | O  | 1.19847949  | -5.16499360 | -5.11062578 |
| C  | -4.50098193 | -2.55116769 | -10.17236338 | C  | 2.54573368  | -5.47911515 | -5.50943031 |
| C  | -3.70046376 | -1.98312920 | -9.18206135  | H  | 2.77964544  | -4.90005259 | -6.40839104 |
| H  | -4.14147553 | -1.71378874 | -8.22449760  | H  | 2.58968935  | -6.54783299 | -5.72562617 |
| H  | -5.55631862 | -2.72499120 | -9.97912448  | C  | 3.40668694  | -5.05859214 | -4.30893772 |
| H  | -4.57437352 | -3.33033267 | -12.18403420 | H  | 4.32724226  | -4.57165380 | -4.64269977 |
| H  | -2.15984304 | -2.90819762 | -12.61212990 | N  | 2.52758594  | -4.04923439 | -3.70289266 |
| H  | -0.74545150 | -1.89592389 | -10.85243238 | C  | 2.99045972  | -2.98511611 | -2.83178506 |
| C  | 2.87306370  | 4.42258749  | -6.56596090  | C  | 4.26323045  | -3.03196883 | -2.36994859 |
| H  | 3.42110441  | 5.34676509  | -6.79297172  | H  | 4.89638363  | -3.86862973 | -2.63599987 |
| H  | 3.55891711  | 3.59637857  | -6.77267826  | C  | 4.87866350  | -2.00710106 | -1.46109112 |
| C  | 1.66363737  | 4.31160824  | -7.46903823  | H  | 5.12023564  | -2.43420024 | -0.47704838 |
| C  | 1.14871296  | 5.43704327  | -8.12688000  | H  | 5.81606229  | -1.60900538 | -1.87444760 |
| C  | 0.02773916  | 5.33743742  | -8.95255013  | H  | 4.21594038  | -1.15462892 | -1.29322121 |
| C  | -0.59660745 | 4.10340953  | -9.13531325  | O  | 2.10444500  | -2.03531380 | -2.58350955 |
| C  | -0.08679795 | 2.97169773  | -8.49546579  | Li | 1.86489626  | -1.66081036 | -0.70527645 |
| C  | 1.03615140  | 3.07301820  | -7.67391979  | O  | 2.06796317  | -3.07784090 | 0.61166404  |

|   |             |             |             |
|---|-------------|-------------|-------------|
| C | 1.14031780  | -3.22175817 | 1.40469904  |
| O | 1.38052038  | -3.34600823 | 2.73634538  |
| C | 0.13059150  | -3.58084503 | 3.41634300  |
| H | 0.12442243  | -2.99497754 | 4.33439705  |
| H | 0.06738061  | -4.64911420 | 3.65504762  |
| C | -0.95389175 | -3.15126489 | 2.41593564  |
| H | -1.20576749 | -2.09439682 | 2.56179946  |
| N | -0.19553882 | -3.27021084 | 1.14628769  |
| C | -0.72696377 | -2.86698535 | -0.15455496 |
| C | -1.74857895 | -3.59709072 | -0.65517286 |
| H | -2.02209196 | -4.50632475 | -0.13145088 |
| C | -2.51673917 | -3.26563481 | -1.90362275 |
| H | -2.24794081 | -3.92297408 | -2.74108371 |
| H | -3.59716036 | -3.37657726 | -1.73927005 |
| H | -2.34456485 | -2.23301338 | -2.22527260 |
| O | -0.15457980 | -1.80936330 | -0.71181744 |
| C | -2.23023698 | -3.99888072 | 2.52425211  |
| H | -2.92803190 | -3.67420465 | 1.74683043  |
| H | -1.98487585 | -5.04904381 | 2.32307438  |
| C | -2.87569426 | -3.86559379 | 3.89059683  |
| C | -3.52686833 | -2.67812867 | 4.25799268  |
| C | -4.10752996 | -2.54135217 | 5.51839509  |
| C | -4.05113224 | -3.59324839 | 6.43587760  |
| C | -3.41132776 | -4.78115577 | 6.08184199  |
| C | -2.82867190 | -4.91330340 | 4.81944771  |
| H | -2.34025485 | -5.84673215 | 4.54769569  |
| H | -3.36742764 | -5.60861960 | 6.78532938  |
| H | -4.50668391 | -3.48822980 | 7.41689454  |
| H | -4.60817367 | -1.61363857 | 5.78277878  |
| H | -3.58413089 | -1.85635263 | 3.54749884  |
| C | 3.77987444  | -6.23877855 | -3.36793283 |
| H | 4.43049132  | -6.90574989 | -3.94918806 |
| H | 4.38642969  | -5.84634101 | -2.54711839 |
| C | 2.61339752  | -7.02036801 | -2.80348277 |
| C | 2.23536001  | -8.25267138 | -3.35397662 |
| C | 1.15033773  | -8.96607088 | -2.84229568 |
| C | 0.42426991  | -8.45505424 | -1.76602492 |
| C | 0.79785419  | -7.23426927 | -1.20003484 |
| C | 1.88651957  | -6.52538365 | -1.70920057 |
| H | 2.17549114  | -5.58323373 | -1.25005608 |
| H | 0.24358564  | -6.82794034 | -0.35832637 |
| H | -0.42249097 | -9.00713356 | -1.36675152 |
| H | 0.87549952  | -9.92101303 | -3.28296172 |
| H | 2.80429504  | -8.66573477 | -4.18497023 |

**Table 43.** Geometric coordinates and thermally corrected MP2 energies for 5 monomer with no THF

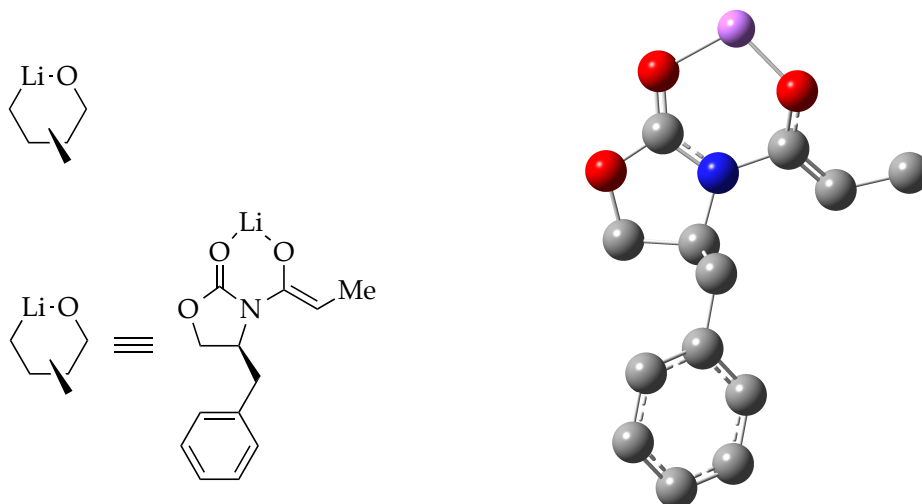

G = -791.626405 Hartree

$G_{\text{MP2}} = -495177.2338$  kcal/mol

$\Delta G_{\text{MP2}} = 55.84024071$  kcal/mol Li vs. 5 spirocyclic dimer with three THF

| Atom | X           | Y           | Z           | Atom | X           | Y           | Z           |
|------|-------------|-------------|-------------|------|-------------|-------------|-------------|
| C    | 0.0000000   | 0.0000000   | 0.0000000   | C    | 2.20195589  | -2.09667712 | -2.00789260 |
| H    | 0.0000000   | 0.0000000   | 1.09522300  | H    | 2.29732397  | -1.11536793 | -2.46829647 |
| H    | 1.02888286  | 0.0000000   | -0.36285900 | H    | 4.32232685  | -2.47320896 | -2.04572825 |
| C    | -0.85989390 | -1.13278175 | -0.58448864 | H    | 4.11978511  | -4.73089164 | -1.02021858 |
| H    | -0.99621882 | -1.92407742 | 0.15562016  | H    | 1.87083625  | -5.61597362 | -0.42857983 |
| N    | -2.12615868 | -0.41786311 | -0.80753267 | H    | -0.15118001 | -4.25529866 | -0.85320184 |
| C    | -1.91615814 | 0.92010477  | -0.80171682 |      |             |             |             |
| O    | -0.64090962 | 1.21220808  | -0.44880084 |      |             |             |             |
| O    | -2.70046398 | 1.84505961  | -1.06270013 |      |             |             |             |
| Li   | -4.19521848 | 1.33738395  | -1.97511019 |      |             |             |             |
| O    | -4.14225086 | -0.39370968 | -2.01268292 |      |             |             |             |
| C    | -3.38220253 | -1.08526978 | -1.22459252 |      |             |             |             |
| C    | -3.58552869 | -2.34384488 | -0.76161231 |      |             |             |             |
| H    | -2.88344697 | -2.78088152 | -0.05865091 |      |             |             |             |
| C    | -4.78951069 | -3.15569871 | -1.14474376 |      |             |             |             |
| H    | -5.38185919 | -2.62374376 | -1.89443332 |      |             |             |             |
| H    | -4.51125914 | -4.13421085 | -1.56347574 |      |             |             |             |
| H    | -5.44464616 | -3.35917279 | -0.28409724 |      |             |             |             |
| C    | -0.31091992 | -1.74201426 | -1.89510186 |      |             |             |             |
| H    | -1.11446594 | -2.34909777 | -2.32614477 |      |             |             |             |
| H    | -0.10253972 | -0.92685006 | -2.59910966 |      |             |             |             |
| C    | 0.92940374  | -2.57930886 | -1.67444289 |      |             |             |             |
| C    | 0.83022395  | -3.85735277 | -1.10325806 |      |             |             |             |
| C    | 1.96917276  | -4.62642741 | -0.86727286 |      |             |             |             |
| C    | 3.23204501  | -4.13082027 | -1.20080601 |      |             |             |             |
| C    | 3.34520026  | -2.86426624 | -1.77443243 |      |             |             |             |



**Table 44.** Geometric coordinates and thermally corrected MP2 energies for 5 monomer with one THF

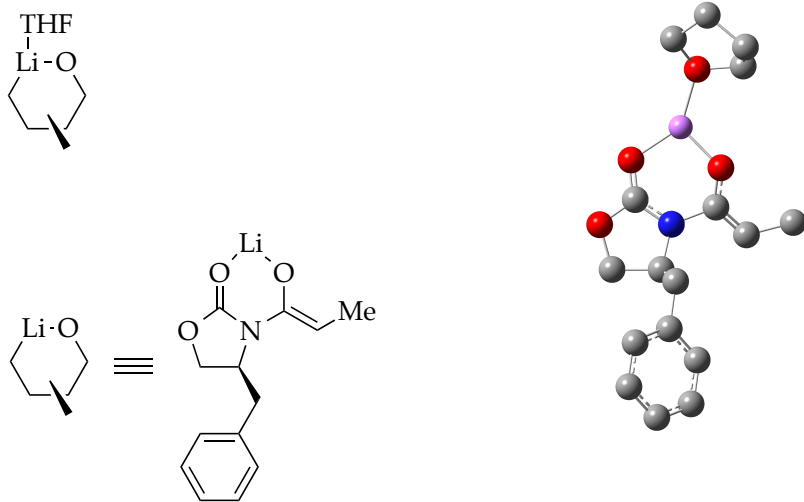

G = -1023.997533 Hartree

G<sub>MP2</sub> = -640527.7041 kcal/mol

ΔG<sub>MP2</sub> = 17.66023664 kcal/mol Li vs. 5 spirocyclic dimer with three THF

| Atom | X           | Y           | Z           | Atom | X           | Y           | Z           |
|------|-------------|-------------|-------------|------|-------------|-------------|-------------|
| C    | 0.00000000  | 0.00000000  | 0.00000000  | H    | -7.23371222 | 3.43595423  | -5.15993745 |
| H    | 0.00000000  | 0.00000000  | 1.09560600  | H    | -5.79017263 | 4.20778178  | -3.41982294 |
| H    | 1.02978539  | 0.00000000  | -0.36116898 | H    | -4.35829463 | 3.44230169  | -4.14765575 |
| C    | -0.85634521 | -1.13699797 | -0.58130218 | C    | -0.30428854 | -1.75038333 | -1.88935602 |
| H    | -0.98895164 | -1.92732524 | 0.16090767  | H    | -1.10943737 | -2.35584958 | -2.31984631 |
| N    | -2.12302697 | -0.42821125 | -0.80736568 | H    | -0.09180130 | -0.93708412 | -2.59424851 |
| C    | -1.92264561 | 0.91307394  | -0.80217834 | C    | 0.93203144  | -2.59210988 | -1.66529964 |
| O    | -0.64230888 | 1.20811414  | -0.45132802 | C    | 0.82688464  | -3.86747877 | -1.08880572 |
| O    | -2.70983118 | 1.83087324  | -1.05597588 | C    | 1.96185106  | -4.64109054 | -0.84847601 |
| Li   | -4.24845674 | 1.36237374  | -1.98633705 | C    | 3.22757575  | -4.15325222 | -1.18275691 |
| O    | -4.11734580 | -0.40813458 | -2.03901172 | C    | 3.34697675  | -2.88956159 | -1.76144203 |
| C    | -3.37089249 | -1.09761362 | -1.24307013 | C    | 2.20761354  | -2.11748589 | -1.99917054 |
| C    | -3.57123020 | -2.36061732 | -0.78383048 | H    | 2.30853214  | -1.13810540 | -2.46250220 |
| H    | -2.87706792 | -2.79229859 | -0.06968281 | H    | 4.32630799  | -2.50383093 | -2.03275099 |
| C    | -4.76379890 | -3.18067890 | -1.18482871 | H    | 4.11236610  | -4.75661447 | -0.99836438 |
| H    | -5.34124176 | -2.65578267 | -1.95142015 | H    | 1.85814605  | -5.62820400 | -0.40536180 |
| H    | -4.47567430 | -4.16194680 | -1.59139177 | H    | -0.15653535 | -4.25951160 | -0.83730516 |
| H    | -5.43974777 | -3.38038295 | -0.33896441 |      |             |             |             |
| O    | -5.59227423 | 2.16669006  | -3.08505826 |      |             |             |             |
| C    | -5.42952621 | 3.31998586  | -3.94874543 |      |             |             |             |
| C    | -6.22539271 | 3.01183885  | -5.22588906 |      |             |             |             |
| C    | -6.29412293 | 1.47501737  | -5.22404705 |      |             |             |             |
| C    | -6.42684831 | 1.16945431  | -3.73590578 |      |             |             |             |
| H    | -6.05049981 | 0.19128672  | -3.42866186 |      |             |             |             |
| H    | -7.46061938 | 1.29467399  | -3.38714627 |      |             |             |             |
| H    | -5.36635512 | 1.04259931  | -5.61621766 |      |             |             |             |
| H    | -7.13013301 | 1.08221537  | -5.81011618 |      |             |             |             |
| H    | -5.74603805 | 3.42267193  | -6.11906672 |      |             |             |             |

**Table 45.** Geometric coordinates and thermally corrected MP2 energies for 5 monomer with two THF

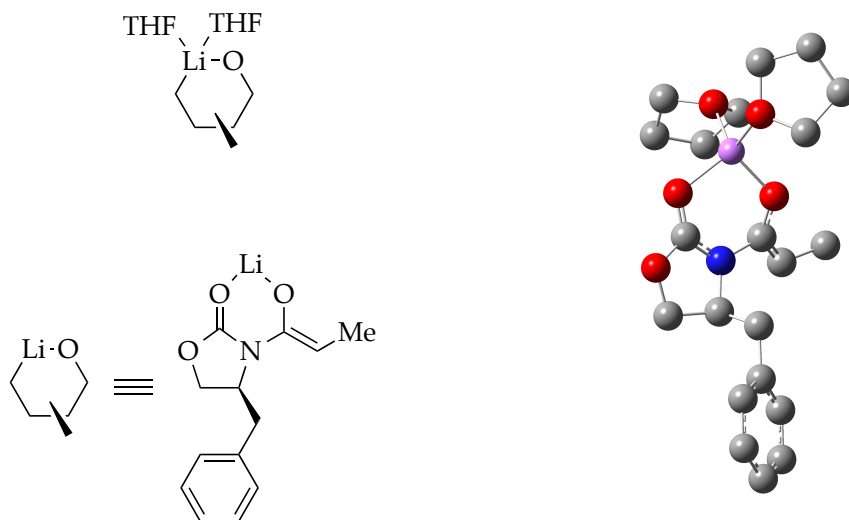

G = - 1256.35369 Hartree

$G_{\text{MP2}} = - 785850.9491$  kcal/mol

$\Delta G_{\text{MP2}} = 6.705758941$  kcal/mol vs. 5 spirocyclic dimer with three THF

| Atom | X           | Y           | Z           | Atom | X           | Y           | Z           |
|------|-------------|-------------|-------------|------|-------------|-------------|-------------|
| C    | 0.0000000   | 0.0000000   | 0.0000000   | C    | 3.23191972  | -4.14942853 | -1.18862772 |
| H    | 0.0000000   | 0.0000000   | 1.09591670  | C    | 3.34834282  | -2.88375789 | -1.76365751 |
| H    | 1.03039198  | 0.0000000   | -0.35988750 | C    | 2.20708940  | -2.11403361 | -1.99978247 |
| C    | -0.85548735 | -1.14040296 | -0.57873722 | H    | 2.30536927  | -1.13303073 | -2.46015724 |
| H    | -0.98374107 | -1.93338445 | 0.16194467  | H    | 4.32682134  | -2.49474419 | -2.03343954 |
| N    | -2.12155385 | -0.43327616 | -0.80001351 | H    | 4.11819928  | -4.75110581 | -1.00574954 |
| C    | -1.92468851 | 0.90937628  | -0.80761702 | H    | 1.86617340  | -5.63013797 | -0.41592370 |
| O    | -0.64225263 | 1.20675652  | -0.45352409 | H    | -0.15223295 | -4.26450490 | -0.84427621 |
| O    | -2.71813403 | 1.81422659  | -1.06929285 | C    | -5.39356538 | 2.90253188  | -4.50843032 |
| Li   | -4.22598888 | 1.36376188  | -2.17654212 | O    | -4.35741118 | 2.00750838  | -4.04039326 |
| O    | -4.02646528 | -0.45852551 | -2.16686227 | C    | -4.08295332 | 1.00489802  | -5.04553468 |
| C    | -3.36269252 | -1.09556148 | -1.26535991 | C    | -5.38347536 | 0.89207005  | -5.83603537 |
| C    | -3.63168630 | -2.30730779 | -0.70638681 | C    | -5.86052734 | 2.35460656  | -5.86920881 |
| H    | -2.99562381 | -2.68220567 | 0.09013946  | H    | -5.37137528 | 2.89342560  | -6.68877056 |
| C    | -4.79669522 | -3.15319056 | -1.13540525 | H    | -6.94180988 | 2.45217990  | -6.00456134 |
| H    | -5.28402529 | -2.70791390 | -2.00834354 | H    | -5.23839859 | 0.46529200  | -6.83318888 |
| H    | -4.48938820 | -4.17447701 | -1.40721007 | H    | -6.09631945 | 0.26154051  | -5.29225496 |
| H    | -5.55901876 | -3.26013739 | -0.34745711 | H    | -3.25431259 | 1.34817155  | -5.68166082 |
| C    | -0.30566048 | -1.75319124 | -1.88814654 | H    | -3.79216470 | 0.09743187  | -4.51265551 |
| H    | -1.11076229 | -2.36174940 | -2.31463758 | H    | -6.18899432 | 2.89968882  | -3.75651043 |
| H    | -0.09818527 | -0.94031143 | -2.59488504 | H    | -4.98127085 | 3.91532256  | -4.58077796 |
| C    | 0.93261128  | -2.59281683 | -1.66755968 | C    | -6.68366416 | 0.83748089  | -0.76200001 |
| C    | 0.83050215  | -3.87004374 | -1.09470920 | O    | -5.90334689 | 1.95194338  | -1.24276453 |
| C    | 1.96735052  | -4.64144175 | -0.85615709 | C    | -5.80130139 | 2.87235589  | -0.14278373 |

|   |             |             |             |
|---|-------------|-------------|-------------|
| C | -5.62860532 | 1.99652152  | 1.10955690  |
| C | -6.24226535 | 0.62847862  | 0.69802526  |
| H | -5.49256763 | -0.16532919 | 0.75236588  |
| H | -7.08670600 | 0.34117756  | 1.33208269  |
| H | -4.56734743 | 1.88601678  | 1.34687941  |
| H | -6.12485353 | 2.43851491  | 1.97905856  |
| H | -4.95429447 | 3.53104420  | -0.34545860 |
| H | -6.72246850 | 3.47174900  | -0.09284268 |
| H | -7.74999157 | 1.09723693  | -0.83331256 |
| H | -6.45948532 | -0.01027718 | -1.41054894 |

**Table 46.** Geometric coordinates and thermally corrected MP2 energies for 5 monomer with three THF

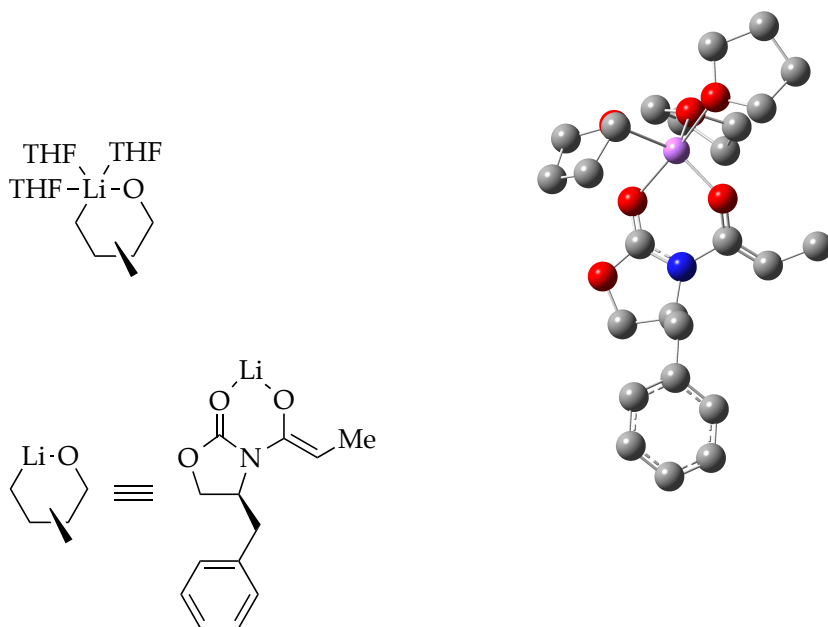

G = -1488.697668 Hartree

G<sub>MP2</sub> = -931168.1672 kcal/mol

ΔG<sub>MP2</sub> = 1.777728882 kcal/mol Li vs. 5 spirocyclic dimer with three THF

| Atom | X           | Y           | Z           | Atom | X           | Y          | Z           |
|------|-------------|-------------|-------------|------|-------------|------------|-------------|
| C    | 0.00000000  | 0.00000000  | 0.00000000  | H    | -6.80171037 | 2.60700094 | -3.59975795 |
| H    | 0.00000000  | 0.00000000  | 1.09594000  | H    | -6.31410918 | 2.67479076 | -5.31025337 |
| H    | 1.03066998  | 0.00000000  | -0.35974383 | O    | -3.32136783 | 2.90205065 | -3.76041224 |
| C    | -0.85316631 | -1.14441615 | -0.57725508 | C    | -2.85974559 | 2.47204057 | -5.04842001 |
| H    | -0.98029291 | -1.93649274 | 0.16534604  | C    | -1.34964607 | 2.25033660 | -4.87083115 |
| N    | -2.11842155 | -0.44096168 | -0.80121795 | C    | -0.96978914 | 3.24248220 | -3.73607744 |
| C    | -1.93456686 | 0.90087743  | -0.80409189 | C    | -2.32693566 | 3.82694767 | -3.29082687 |
| O    | -0.64453267 | 1.20553213  | -0.45424963 | H    | -2.50912249 | 4.80845278 | -3.75440419 |
| O    | -2.73602623 | 1.79426663  | -1.06148375 | H    | -2.43639544 | 3.90177402 | -2.21024045 |
| C    | -3.34485027 | -1.08936684 | -1.31776815 | H    | -0.29145113 | 4.02946614 | -4.08072996 |
| O    | -3.94969478 | -0.45044848 | -2.25651827 | H    | -0.48651079 | 2.72260351 | -2.90494278 |
| Li   | -4.21593375 | 1.39759846  | -2.49053784 | H    | -0.79773129 | 2.43127560 | -5.79860894 |
| O    | -5.57440760 | 1.08006719  | -4.19391830 | H    | -1.15511072 | 1.21838809 | -4.56204428 |
| C    | -6.63423766 | 2.00849569  | -4.49905687 | H    | -3.43105001 | 1.58350758 | -5.31587396 |
| C    | -7.86470437 | 1.16241863  | -4.89526286 | H    | -3.05813696 | 3.26450037 | -5.78780773 |
| C    | -7.48655499 | -0.25387141 | -4.42289714 | O    | -5.77654675 | 2.12760340 | -1.31084364 |
| C    | -5.96920194 | -0.24331523 | -4.59354319 | C    | -5.55171938 | 3.20328131 | -0.36813717 |
| H    | -5.69196602 | -0.41288884 | -5.64697535 | C    | -6.20389452 | 2.76558038 | 0.95139395  |
| H    | -5.42006442 | -0.93340955 | -3.95272046 | C    | -6.18305332 | 1.23294871 | 0.83754632  |
| H    | -7.97754996 | -1.04411460 | -4.99970343 | C    | -6.44674952 | 1.02758075 | -0.65219153 |
| H    | -7.74046493 | -0.39221189 | -3.36576493 | H    | -7.52277834 | 1.07753907 | -0.87734773 |
| H    | -8.00653569 | 1.17357414  | -5.98212222 | H    | -6.02719185 | 0.10468583 | -1.05784732 |
| H    | -8.78746392 | 1.53393194  | -4.43899665 | H    | -6.92952530 | 0.74144810 | 1.46927937  |

|   |             |             |             |
|---|-------------|-------------|-------------|
| H | -5.19541249 | 0.83775181  | 1.09814018  |
| H | -7.23714986 | 3.12819324  | 1.01272392  |
| H | -5.66267094 | 3.14306848  | 1.82431946  |
| H | -4.47055600 | 3.33292473  | -0.26424186 |
| H | -5.98776997 | 4.12185564  | -0.77686145 |
| C | -3.65265587 | -2.28855273 | -0.75162469 |
| H | -3.05586139 | -2.64819289 | 0.08202871  |
| C | -4.80763651 | -3.13596707 | -1.20166318 |
| H | -5.28107373 | -2.69786790 | -2.08585431 |
| H | -4.49742560 | -4.15938598 | -1.46344715 |
| H | -5.58542299 | -3.23902695 | -0.42809985 |
| C | -0.29872778 | -1.76128376 | -1.88291290 |
| H | -1.10608630 | -2.36181030 | -2.31660968 |
| H | -0.07845946 | -0.95007159 | -2.58790179 |
| C | 0.92905743  | -2.61367528 | -1.65328589 |
| C | 0.80857337  | -3.88536082 | -1.07149601 |
| C | 1.93417077  | -4.67054093 | -0.82518845 |
| C | 3.20612267  | -4.19847288 | -1.15865892 |
| C | 3.34091939  | -2.93853995 | -1.74203639 |
| C | 2.21070224  | -2.15475958 | -1.98548926 |
| H | 2.32357864  | -1.17786268 | -2.45129386 |
| H | 4.32519422  | -2.56475485 | -2.01236111 |
| H | 4.08366141  | -4.81104786 | -0.96983251 |
| H | 1.81846032  | -5.65458290 | -0.37810616 |
| H | -0.17999370 | -4.26448076 | -0.82042804 |

**Table 47.** Geometric coordinates and thermally corrected MP2 energies for 5 LDA mixed dimer with three THF

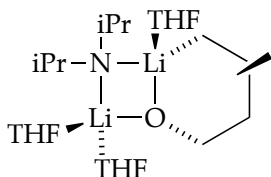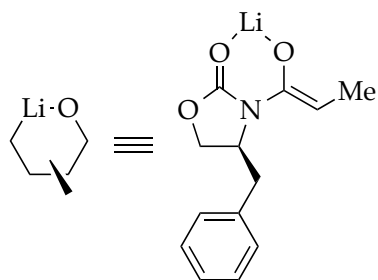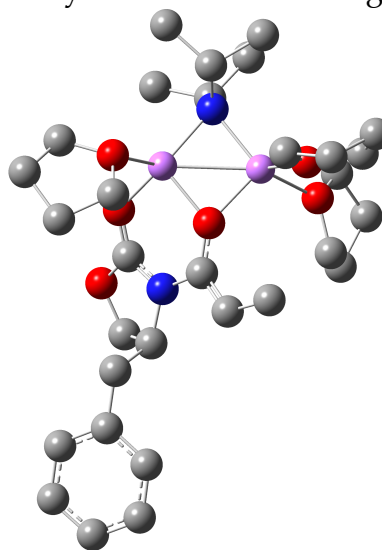

G = -1787.915892 Hartree

$G_{\text{MP2}} = -1118227.787$  kcal/mol

$\Delta G_{\text{MP2}} = 0$  kcal/mol Li vs. 5 LDA mixed dimer with three THF

| Atom | X           | Y           | Z          | Atom | X           | Y           | Z           |
|------|-------------|-------------|------------|------|-------------|-------------|-------------|
| Li   | 0.00000000  | 0.00000000  | 0.00000000 | H    | -5.37823608 | 0.15904441  | 4.55541500  |
| O    | 0.00000000  | 0.00000000  | 1.95527310 | H    | -5.00957212 | -1.13231849 | 2.57142406  |
| C    | 0.81677532  | 0.00000000  | 2.96012211 | H    | -3.68121045 | -2.05630954 | 3.31902711  |
| N    | 0.86336440  | -1.25049413 | 3.72021522 | N    | -1.62880436 | -1.15561486 | -0.35706991 |
| C    | 1.79873533  | -1.52869629 | 4.81768955 | C    | -2.79402158 | -0.45997865 | -0.91510556 |
| C    | 1.73906511  | -3.05949988 | 4.82987813 | H    | -2.94590531 | 0.40138762  | -0.24044276 |
| H    | 2.47498393  | -3.50931433 | 4.15309160 | C    | -2.60424514 | 0.17761214  | -2.32042560 |
| H    | 1.84234736  | -3.49590858 | 5.82446021 | H    | -2.59045835 | -0.56851309 | -3.12149205 |
| O    | 0.41878550  | -3.35356258 | 4.33777452 | H    | -3.41988556 | 0.88159084  | -2.54563655 |
| C    | -0.01030452 | -2.29654314 | 3.58584778 | H    | -1.65758240 | 0.72808454  | -2.35735951 |
| O    | -1.05352614 | -2.38130518 | 2.95222075 | C    | -4.15093636 | -1.20719898 | -0.89977196 |
| Li   | -1.60196420 | -1.01790348 | 1.65312489 | H    | -4.97307454 | -0.52050149 | -1.14664786 |
| O    | -3.17268196 | -0.16877952 | 2.65474479 | H    | -4.18220751 | -2.02305911 | -1.63132648 |
| C    | -4.14611398 | -1.06788624 | 3.24103793 | H    | -4.35095076 | -1.63489513 | 0.08886877  |
| C    | -4.49450081 | -0.48672830 | 4.61974407 | C    | -1.30184465 | -2.51169766 | -0.81578543 |
| C    | -3.24907053 | 0.35031306  | 4.95412108 | H    | -0.27908561 | -2.69076714 | -0.43384351 |
| C    | -2.86645497 | 0.89408490  | 3.57906752 | C    | -1.21224699 | -2.74465874 | -2.34488342 |
| H    | -1.80693666 | 1.13203475  | 3.46290128 | H    | -0.75201513 | -3.71877729 | -2.56400519 |
| H    | -3.46500004 | 1.78098483  | 3.32297081 | H    | -2.20243431 | -2.74703528 | -2.81543969 |
| H    | -2.44858932 | -0.29022317 | 5.34201444 | H    | -0.61428407 | -1.96586672 | -2.83144184 |
| H    | -3.44178883 | 1.14227780  | 5.68457171 | C    | -2.13643300 | -3.66823885 | -0.19591145 |
| H    | -4.70210151 | -1.26811167 | 5.35686772 | H    | -2.16431602 | -3.57777562 | 0.89509827  |

|   |             |             |             |
|---|-------------|-------------|-------------|
| H | -3.16684010 | -3.68211951 | -0.56560736 |
| H | -1.68823204 | -4.64366739 | -0.43710313 |
| H | 2.79615785  | -1.16844311 | 4.55482436  |
| C | 1.33464490  | -0.89955373 | 6.15763737  |
| H | 1.13712428  | 0.16230775  | 5.98083211  |
| H | 0.37930906  | -1.36155505 | 6.43642879  |
| C | 2.34315313  | -1.07456927 | 7.27209315  |
| C | 3.51581682  | -0.30401532 | 7.29926346  |
| C | 4.46504201  | -0.47785123 | 8.30583652  |
| C | 4.25800259  | -1.42742768 | 9.30920869  |
| C | 3.09455192  | -2.19706269 | 9.29851281  |
| C | 2.14726157  | -2.02041747 | 8.28760766  |
| H | 1.23707324  | -2.61666664 | 8.29299534  |
| H | 2.91980715  | -2.93331473 | 10.07868455 |
| H | 4.99570111  | -1.56134536 | 10.09574262 |
| H | 5.36451024  | 0.13235824  | 8.31064683  |
| H | 3.68120297  | 0.44691548  | 6.52927166  |
| C | 1.64274449  | 1.01148344  | 3.35192052  |
| H | 2.27420385  | 0.89551893  | 4.22458771  |
| C | 1.70128412  | 2.33429163  | 2.63984709  |
| H | 1.21296861  | 2.27146624  | 1.66338001  |
| H | 1.20945069  | 3.14221604  | 3.20615909  |
| H | 2.73849715  | 2.66203795  | 2.47719136  |
| O | 1.88498098  | -0.40807203 | -0.73275030 |
| C | 3.06609920  | -0.08405751 | 0.03289678  |
| C | 4.02250377  | -1.25102408 | -0.20177448 |
| C | 3.72754416  | -1.60212551 | -1.66828398 |
| C | 2.21365993  | -1.36841124 | -1.76585118 |
| H | 1.64280187  | -2.28135772 | -1.57158429 |
| H | 1.90271879  | -0.96425905 | -2.73461539 |
| H | 4.00553554  | -2.62601657 | -1.93533071 |
| H | 4.26900447  | -0.92134143 | -2.33594323 |
| H | 3.76381068  | -2.09069817 | 0.45432199  |
| H | 5.06815984  | -0.98316738 | -0.02116547 |
| H | 3.49330235  | 0.85740839  | -0.34324412 |
| H | 2.76589838  | 0.05440411  | 1.07390894  |
| O | -0.04598026 | 1.98298805  | -0.57443947 |
| C | -1.04981245 | 2.89659415  | -0.08657295 |
| C | -0.62465764 | 4.26987350  | -0.60387140 |
| C | -0.02240942 | 3.91081410  | -1.97174993 |
| C | 0.66222143  | 2.56670067  | -1.68780703 |
| H | 1.71163779  | 2.69575247  | -1.39583512 |
| H | 0.61760305  | 1.87530657  | -2.53519427 |
| H | 0.67700653  | 4.66215392  | -2.35083385 |
| H | -0.81893016 | 3.78416484  | -2.71383240 |
| H | 0.13889366  | 4.70533971  | 0.05158547  |
| H | -1.46114362 | 4.97217859  | -0.67056435 |
| H | -2.02872455 | 2.60073968  | -0.48455330 |
| H | -1.06845886 | 2.81126843  | 1.00241946  |

**Table 48.** Geometric coordinates and thermally corrected MP2 energies for 5 LDA mixed spirocyclic dimer with three THF

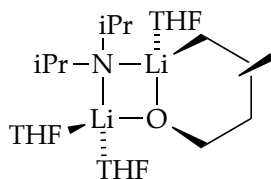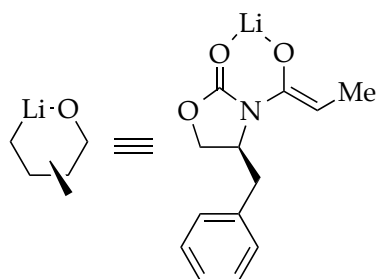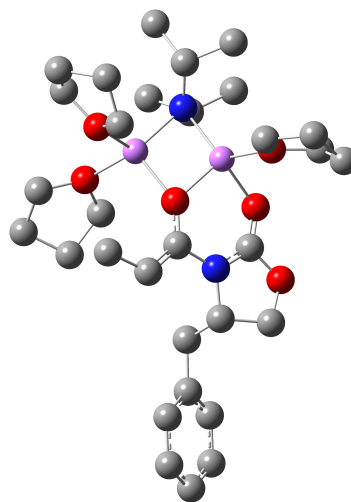

G = -1787.914072 Hartree

G<sub>MP2</sub> = -1118226.969 kcal/mol

ΔG<sub>MP2</sub> = 0.409071258 kcal/mol Li vs. 5 LDA mixed dimer with three THF

| Atom | X           | Y           | Z          | Atom | X           | Y           | Z           |
|------|-------------|-------------|------------|------|-------------|-------------|-------------|
| Li   | 0.0000000   | 0.0000000   | 0.0000000  | H    | -2.57693330 | -2.07636022 | 3.26136163  |
| O    | 0.0000000   | 0.0000000   | 1.94667770 | N    | -1.74875205 | 0.96219277  | -0.33587249 |
| C    | 0.75186238  | 0.0000000   | 3.00030639 | C    | -1.59252690 | 2.40754298  | -0.55675899 |
| N    | 0.45661276  | 1.05169231  | 3.98307140 | H    | -0.94150317 | 2.73814906  | 0.27231128  |
| C    | 1.32148232  | 1.36938551  | 5.12829914 | C    | -0.82346752 | 2.83806863  | -1.83865905 |
| C    | 0.36548147  | 2.22358551  | 5.96862194 | H    | -1.43120978 | 2.75021231  | -2.74540621 |
| H    | -0.19336219 | 1.62361231  | 6.69662555 | H    | -0.50728107 | 3.88914534  | -1.76315087 |
| H    | 0.85673288  | 3.05125162  | 6.48289821 | H    | 0.07103620  | 2.21943168  | -1.97106742 |
| O    | -0.55949489 | 2.76254797  | 5.01072387 | C    | -2.86250948 | 3.28506332  | -0.42951143 |
| C    | -0.56517872 | 1.95910513  | 3.90414013 | H    | -2.59629854 | 4.35086619  | -0.40242113 |
| O    | -1.41370475 | 2.13219052  | 3.03935697 | H    | -3.54544688 | 3.14441236  | -1.27609839 |
| Li   | -1.73823887 | 0.76326655  | 1.67853986 | H    | -3.41037085 | 3.05093577  | 0.49061957  |
| O    | -3.21903224 | -0.18537937 | 2.75767016 | C    | -2.74123744 | 0.21280986  | -1.10991280 |
| C    | -3.47451327 | -1.60172355 | 2.84885659 | H    | -2.47321173 | -0.84782045 | -0.94694108 |
| C    | -4.69756080 | -1.76403426 | 3.76948056 | C    | -2.73439130 | 0.39442757  | -2.64821312 |
| C    | -4.71394648 | -0.43935740 | 4.55130394 | H    | -3.35382157 | -0.37329721 | -3.13385174 |
| C    | -4.21757613 | 0.54554624  | 3.49564130 | H    | -3.13949624 | 1.36822035  | -2.94657005 |
| H    | -3.73524418 | 1.44105166  | 3.89091535 | H    | -1.71747534 | 0.32146750  | -3.05031590 |
| H    | -5.02857469 | 0.84588907  | 2.81642378 | C    | -4.21399332 | 0.30952139  | -0.61918942 |
| H    | -4.01249649 | -0.47752741 | 5.39326760 | H    | -4.26002334 | 0.14722658  | 0.46285536  |
| H    | -5.70368033 | -0.18126862 | 4.94028956 | H    | -4.66003621 | 1.28678931  | -0.83133634 |
| H    | -4.61910855 | -2.64583129 | 4.41241858 | H    | -4.84250502 | -0.45064618 | -1.10811706 |
| H    | -5.61347512 | -1.86206605 | 3.17571527 | H    | 1.58997751  | 0.45634886  | 5.66439740  |
| H    | -3.65049195 | -1.99771301 | 1.84210063 | C    | 2.60218302  | 2.12413583  | 4.69410914  |



|   |             |             |             |   |             |             |             |
|---|-------------|-------------|-------------|---|-------------|-------------|-------------|
| H | 3.07715378  | 1.53088747  | 3.90631939  | H | -0.47033475 | -1.56604258 | -2.66866937 |
| H | 2.30128842  | 3.07986725  | 4.24741880  | H | 1.21135837  | -2.11758226 | -2.46930856 |
| C | 3.56713610  | 2.35903215  | 5.83512371  | H | -0.76074245 | -3.91025235 | -3.22465131 |
| C | 4.33943832  | 1.30278372  | 6.34282416  | H | 0.53054970  | -4.40671865 | -2.11510670 |
| C | 5.21340424  | 1.50225754  | 7.41089914  | H | -2.25251873 | -3.36674374 | -1.35045883 |
| C | 5.33356415  | 2.76666308  | 7.99260253  | H | -1.46790180 | -4.84433739 | -0.75480843 |
| C | 4.57580381  | 3.82730302  | 7.49558969  | H | 0.12487631  | -3.56998636 | 0.57038023  |
| C | 3.70065669  | 3.62251370  | 6.42665217  | H | -1.28093526 | -2.48832728 | 0.69235647  |
| H | 3.12197446  | 4.45761514  | 6.03740378  | O | 1.81427539  | 0.74787215  | -0.59447830 |
| H | 4.66711989  | 4.81684293  | 7.93582758  | C | 2.24292451  | 1.92490172  | 0.12737127  |
| H | 6.01662821  | 2.92379064  | 8.82299218  | C | 3.68230164  | 1.63377204  | 0.54571135  |
| H | 5.80581952  | 0.67164719  | 7.78592089  | C | 4.19640547  | 0.82282462  | -0.65367560 |
| H | 4.26203202  | 0.31728881  | 5.88787470  | C | 2.96313123  | -0.00469391 | -1.04029282 |
| C | 1.77262045  | -0.85548892 | 3.28954868  | H | 2.95051481  | -0.97786862 | -0.53678024 |
| H | 2.29970335  | -0.77803111 | 4.23293882  | H | 2.87941564  | -0.16477610 | -2.12088059 |
| C | 2.16959929  | -1.98717384 | 2.38492818  | H | 5.05947004  | 0.19380637  | -0.41552879 |
| H | 1.71557774  | -1.87429798 | 1.39697691  | H | 4.48214447  | 1.49364389  | -1.47241922 |
| H | 3.26030678  | -2.03875240 | 2.25034814  | H | 3.68939004  | 1.02164703  | 1.45451271  |
| H | 1.86259494  | -2.97097460 | 2.77739945  | H | 4.25999916  | 2.54440620  | 0.73187090  |
| O | 0.12257454  | -1.94139624 | -0.71788146 | H | 2.18011430  | 2.79485442  | -0.53985938 |
| C | -0.59593857 | -2.97572070 | -0.00527299 | H | 1.55419718  | 2.06571703  | 0.96284052  |
| C | -1.28980121 | -3.81452362 | -1.07936510 |   |             |             |             |
| C | -0.30297368 | -3.70740424 | -2.25191033 |   |             |             |             |
| C | 0.18174826  | -2.26056468 | -2.12741028 |   |             |             |             |

**Table 49.** Geometric coordinates and thermally corrected MP2 energies for **5 18** mixed dimer with three THF

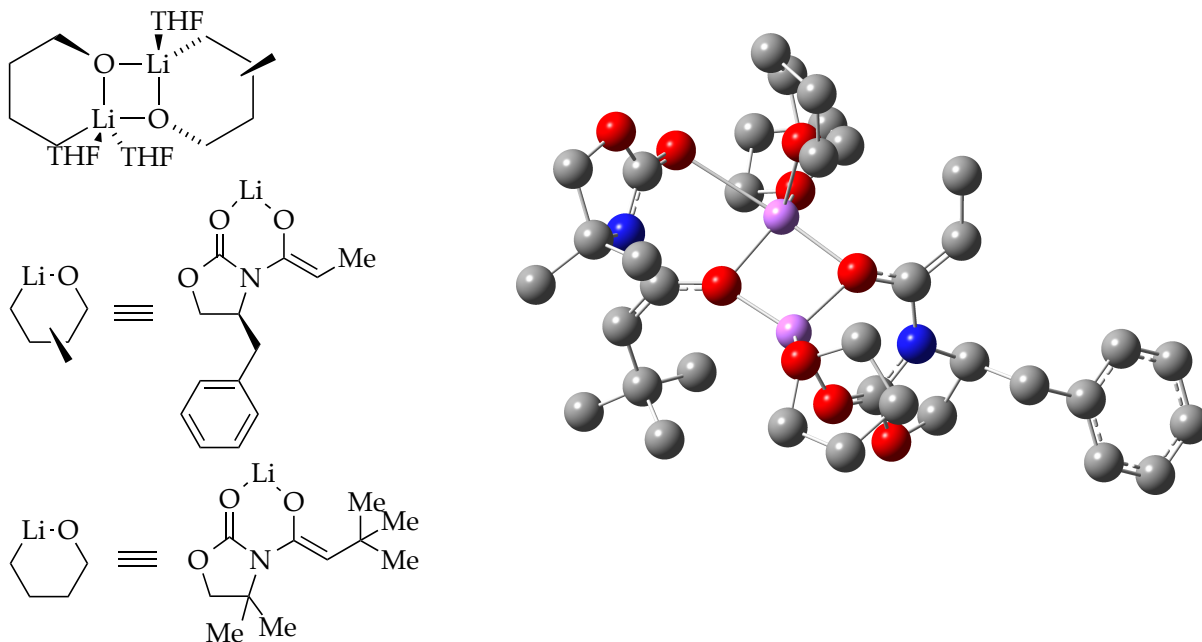

G = -2206.530974 Hartree

$G_{\text{MP2}} = -1380179.361$  kcal/mol

$\Delta G_{\text{MP2}} = 1.654267068$  kcal/mol Li vs. **5 18** mixed dimer with three THF isomer

| Atom | X           | Y           | Z           | Atom | X           | Y           | Z           |
|------|-------------|-------------|-------------|------|-------------|-------------|-------------|
| Li   | 0.00000000  | 0.00000000  | 0.00000000  | O    | -2.47747561 | 0.77800261  | -3.32883304 |
| O    | 0.00000000  | 0.00000000  | 2.03020200  | C    | -1.67716660 | -0.10470801 | -2.64379118 |
| C    | 0.98463157  | 0.00000000  | 2.87369909  | O    | -0.47073609 | 0.06214084  | -2.55656956 |
| N    | 1.23308890  | -1.28113404 | 3.54494361  | C    | -4.43148373 | -0.20121979 | -0.95946738 |
| C    | 2.38700454  | -1.56439255 | 4.40993424  | H    | -5.50037246 | 0.01875890  | -1.07099605 |
| C    | 2.39267618  | -3.09455571 | 4.34339983  | H    | -4.30144779 | -0.88466589 | -0.11610738 |
| H    | 2.98073065  | -3.47200983 | 3.49906633  | H    | -3.90933251 | 0.72967032  | -0.71615684 |
| H    | 2.72242930  | -3.57487646 | 5.26569132  | C    | -4.69192596 | -2.04429859 | -2.66586035 |
| O    | 1.00805568  | -3.42837584 | 4.12598901  | H    | -4.29154709 | -2.49414794 | -3.58016026 |
| C    | 0.39680014  | -2.36045986 | 3.53616481  | H    | -4.67303848 | -2.80107975 | -1.87705407 |
| O    | -0.75310501 | -2.46810847 | 3.12324018  | H    | -5.73474128 | -1.75670550 | -2.84675161 |
| Li   | -1.44791896 | -1.20554438 | 1.83177858  | C    | -1.88178306 | -3.31264988 | -1.38201052 |
| O    | -1.40736534 | -1.36587195 | -0.03170272 | H    | -2.26980658 | -3.57233917 | -2.36221633 |
| C    | -1.85633781 | -1.98902224 | -1.08828220 | C    | -1.42951786 | -4.47398358 | -0.50570231 |
| N    | -2.42814547 | -1.11162085 | -2.12536766 | C    | 0.02775580  | -4.28913127 | -0.02871595 |
| C    | -3.87421188 | -0.81776175 | -2.25440305 | H    | 0.14227179  | -3.34859339 | 0.51502648  |
| C    | -3.80139256 | 0.22364519  | -3.39577264 | H    | 0.32958107  | -5.11275307 | 0.63224777  |
| H    | -3.93311340 | -0.24650617 | -4.37804132 | H    | 0.71132539  | -4.27335488 | -0.88626933 |
| H    | -4.52277018 | 1.03686498  | -3.28408574 | C    | -2.35763583 | -4.62841939 | 0.72160881  |

|   |             |             |             |   |             |            |             |
|---|-------------|-------------|-------------|---|-------------|------------|-------------|
| H | -2.05289871 | -5.48321190 | 1.34048736  | H | 3.21297221  | 0.57009362 | 0.70262198  |
| H | -2.32506881 | -3.73696077 | 1.35342683  | O | -0.46114263 | 2.02659303 | -0.24224136 |
| H | -3.39550541 | -4.79042547 | 0.40470098  | C | -1.52206105 | 2.62121570 | 0.53790341  |
| C | -1.50944106 | -5.76844254 | -1.34146931 | C | -1.78669635 | 4.00254562 | -0.07878983 |
| H | -2.53374154 | -5.95319585 | -1.68996624 | C | -1.27874210 | 3.83039578 | -1.51967493 |
| H | -0.86141979 | -5.70663907 | -2.22468245 | C | -0.07595536 | 2.91237987 | -1.31401351 |
| H | -1.19354417 | -6.63715827 | -0.75067844 | H | 0.81350249  | 3.48321580 | -1.00717145 |
| O | -3.16954640 | -0.61277883 | 2.74323178  | H | 0.16032288  | 2.28957994 | -2.17709924 |
| C | -3.96235635 | -1.63449264 | 3.40035707  | H | -1.01172014 | 4.77687925 | -2.00028354 |
| C | -4.21608680 | -1.13575172 | 4.83315393  | H | -2.02521298 | 3.32367075 | -2.14123821 |
| C | -3.08688914 | -0.11318352 | 5.04255276  | H | -1.20172004 | 4.77169943 | 0.43943298  |
| C | -2.95761142 | 0.49234428  | 3.64761191  | H | -2.84173430 | 4.28804876 | -0.02026822 |
| H | -1.97287987 | 0.90666389  | 3.42143606  | H | -2.39735702 | 1.96458773 | 0.47114585  |
| H | -3.72661611 | 1.25933741  | 3.47184456  | H | -1.20379071 | 2.66523481 | 1.58278009  |
| H | -2.15485463 | -0.62001200 | 5.31520424  |   |             |            |             |
| H | -3.31588179 | 0.63277648  | 5.80994549  |   |             |            |             |
| H | -4.19850880 | -1.95170779 | 5.56151685  |   |             |            |             |
| H | -5.19260241 | -0.64242326 | 4.90422337  |   |             |            |             |
| H | -4.88672999 | -1.78163474 | 2.83133517  |   |             |            |             |
| H | -3.38254472 | -2.56206937 | 3.38510297  |   |             |            |             |
| H | 3.29106059  | -1.13816032 | 3.96924561  |   |             |            |             |
| C | 2.18270918  | -1.03297980 | 5.85335698  |   |             |            |             |
| H | 1.91732125  | 0.02666266  | 5.79023708  |   |             |            |             |
| H | 1.31964022  | -1.55364650 | 6.28658017  |   |             |            |             |
| C | 3.39996517  | -1.22571505 | 6.73131460  |   |             |            |             |
| C | 4.53443031  | -0.41600644 | 6.56667733  |   |             |            |             |
| C | 5.67017610  | -0.60412053 | 7.35360444  |   |             |            |             |
| C | 5.69283381  | -1.60783086 | 8.32493481  |   |             |            |             |
| C | 4.57098518  | -2.41751226 | 8.50337258  |   |             |            |             |
| C | 3.43627339  | -2.22624008 | 7.71210008  |   |             |            |             |
| H | 2.56162598  | -2.85505104 | 7.86534680  |   |             |            |             |
| H | 4.57502637  | -3.19689163 | 9.26093476  |   |             |            |             |
| H | 6.57645662  | -1.75326882 | 8.94045333  |   |             |            |             |
| H | 6.53657856  | 0.03684521  | 7.21237620  |   |             |            |             |
| H | 4.52365109  | 0.37577080  | 5.82027460  |   |             |            |             |
| C | 1.81637591  | 1.03561695  | 3.17719992  |   |             |            |             |
| H | 2.59123977  | 0.90966479  | 3.92355856  |   |             |            |             |
| C | 1.69019210  | 2.39899050  | 2.55613868  |   |             |            |             |
| H | 1.09748922  | 2.35798673  | 1.63854810  |   |             |            |             |
| H | 1.21100934  | 3.12903321  | 3.22968495  |   |             |            |             |
| H | 2.67429105  | 2.81793230  | 2.30156329  |   |             |            |             |
| O | 1.89371434  | -0.43206698 | -0.52907401 |   |             |            |             |
| C | 2.99195156  | 0.49231981  | -0.36527637 |   |             |            |             |
| C | 4.14012724  | -0.07015304 | -1.20863763 |   |             |            |             |
| C | 3.38411816  | -0.80184759 | -2.32886884 |   |             |            |             |
| C | 2.19430475  | -1.39041532 | -1.57208246 |   |             |            |             |
| H | 2.45151172  | -2.34837609 | -1.10152327 |   |             |            |             |
| H | 1.29506416  | -1.51066793 | -2.17650120 |   |             |            |             |
| H | 3.98406306  | -1.56825645 | -2.82949323 |   |             |            |             |
| H | 3.03614613  | -0.08913743 | -3.08572061 |   |             |            |             |
| H | 4.73509499  | -0.78183003 | -0.62320331 |   |             |            |             |
| H | 4.81182553  | 0.71323594  | -1.57343633 |   |             |            |             |
| H | 2.67622071  | 1.47799231  | -0.73159874 |   |             |            |             |

**Table 50.** Geometric coordinates and thermally corrected MP2 energies for **5 18** mixed dimer with three THF isomer

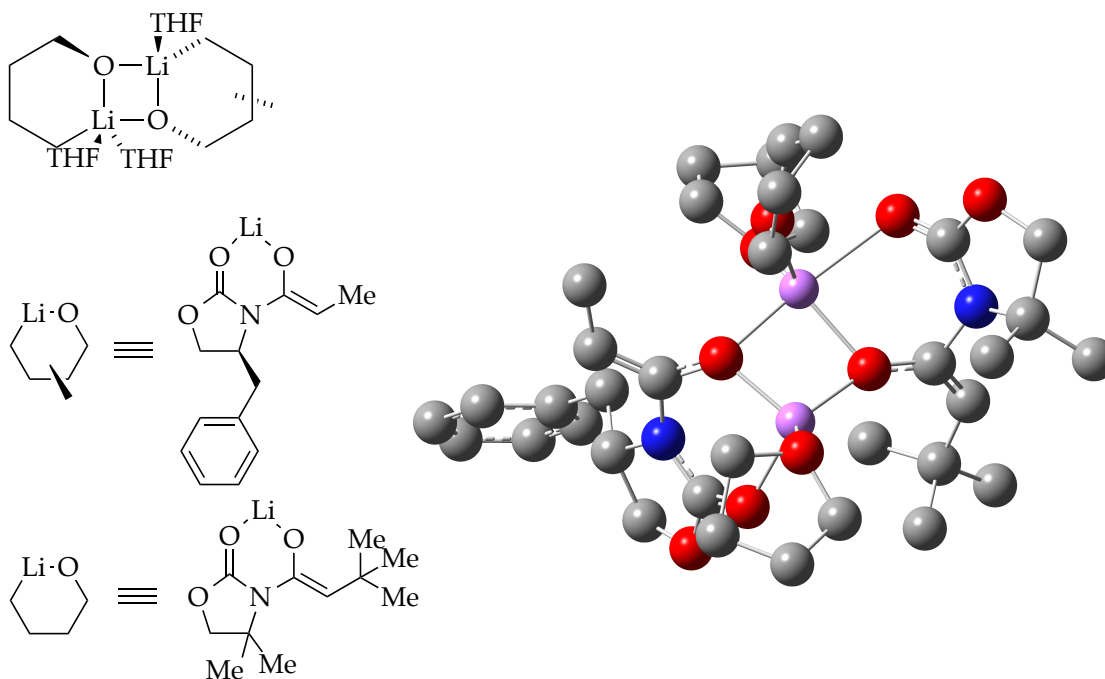

G = -2206.53395 Hartree

$G_{\text{MP2}} = -1380182.669 \text{ kcal/mol}$

$\Delta G_{\text{MP2}} = 0 \text{ kcal/mol Li vs. } \mathbf{5\ 18}$  mixed dimer with three THF isomer

| Atom | X          | Y          | Z          | Atom | X           | Y           | Z           |
|------|------------|------------|------------|------|-------------|-------------|-------------|
| Li   | 0.00000000 | 0.00000000 | 0.00000000 | H    | 5.42188982  | 3.43137927  | 2.43247071  |
| O    | 0.00000000 | 0.00000000 | 2.02253570 | H    | 7.56866782  | 4.08919554  | 3.46982494  |
| C    | 0.88330000 | 0.00000000 | 2.96846562 | H    | 8.51223071  | 2.75099640  | 5.34385558  |
| N    | 1.29414259 | 1.33868580 | 3.42915803 | H    | 7.28587268  | 0.74611289  | 6.16144092  |
| C    | 0.40214017 | 2.34615443 | 3.63120299 | H    | 5.14259799  | 0.08973344  | 5.11924497  |
| O    | 1.00897687 | 3.42064518 | 4.20024092 | H    | 2.72286692  | 1.14582064  | 4.96985692  |
| C    | 2.42655034 | 3.18453991 | 4.25536072 | O    | -0.80115138 | 2.37002811  | 3.38348142  |
| H    | 2.90405329 | 3.77939381 | 3.46901015 | Li   | -1.40176729 | 1.25677279  | 1.88294199  |
| H    | 2.79503953 | 3.51505742 | 5.22774543 | O    | -1.24521357 | 1.57640554  | 0.04910699  |
| C    | 2.59857347 | 1.67136534 | 4.01251696 | C    | -1.48555455 | 2.29183762  | -1.01321839 |
| C    | 3.78909994 | 1.33310420 | 3.09690234 | N    | -2.11862915 | 1.54774424  | -2.12011696 |
| H    | 3.64235366 | 1.84515976 | 2.13874326 | C    | -3.57352064 | 1.56058438  | -2.40189719 |
| H    | 3.75803129 | 0.25758844 | 2.89558257 | C    | -3.60967759 | 0.47654658  | -3.50487616 |
| C    | 5.11781508 | 1.72287697 | 3.70986718 | H    | -3.53626679 | 0.91823775  | -4.50604962 |
| C    | 5.66603374 | 0.97462179 | 4.76308521 | H    | -4.49478431 | -0.16214928 | -3.45470044 |
| C    | 6.87703727 | 1.34179325 | 5.34932338 | O    | -2.44802005 | -0.34070930 | -3.28135942 |
| C    | 7.56687177 | 2.46618928 | 4.88995577 | C    | -1.56144802 | 0.37661038  | -2.52095161 |
| C    | 7.03694545 | 3.21642534 | 3.83989736 | O    | -0.44076888 | -0.04852547 | -2.27486877 |
| C    | 5.82305226 | 2.84623233 | 3.25722807 | C    | -4.37566212 | 1.13921847  | -1.15858230 |

|   |             |             |             |   |             |             |             |
|---|-------------|-------------|-------------|---|-------------|-------------|-------------|
| H | -5.44860303 | 1.11824799  | -1.38499448 | H | 2.88834785  | -1.18914960 | 0.93412016  |
| H | -4.20731768 | 1.84622355  | -0.34144651 | O | -0.70653053 | -2.02594604 | -0.06566208 |
| H | -4.07086202 | 0.14704239  | -0.81109298 | C | -1.90553128 | -2.30652816 | 0.69235148  |
| C | -4.06159287 | 2.91151249  | -2.92958449 | C | -2.50788933 | -3.58037249 | 0.08396542  |
| H | -3.48243459 | 3.22229516  | -3.80518289 | C | -1.97503730 | -3.54340798 | -1.35691402 |
| H | -3.96021226 | 3.68263603  | -2.16126697 | C | -0.57593570 | -2.96490966 | -1.15153221 |
| H | -5.11803268 | 2.84404717  | -3.21638757 | H | 0.14021017  | -3.74953012 | -0.86402487 |
| C | -1.23600185 | 3.60095225  | -1.26370475 | H | -0.19623820 | -2.41542208 | -2.01375648 |
| H | -1.47446598 | 3.95242157  | -2.26287614 | H | -1.96022538 | -4.52569727 | -1.83991227 |
| C | -0.63004491 | 4.62152064  | -0.30894696 | H | -2.56877567 | -2.86217656 | -1.97672073 |
| C | 0.74907072  | 4.15001061  | 0.20702860  | H | -2.13297502 | -4.47014699 | 0.60418811  |
| H | 0.66817426  | 3.17340623  | 0.69171782  | H | -3.60085507 | -3.59243417 | 0.14448034  |
| H | 1.16292186  | 4.86813255  | 0.92860752  | H | -2.57986144 | -1.44709998 | 0.59500615  |
| H | 1.45885862  | 4.05619847  | -0.62432252 | H | -1.63351774 | -2.40892197 | 1.74581551  |
| C | -1.56550187 | 4.88124841  | 0.89436293  |   |             |             |             |
| H | -1.14555220 | 5.64710168  | 1.56042760  |   |             |             |             |
| H | -1.70753645 | 3.97352477  | 1.48672121  |   |             |             |             |
| H | -2.54754685 | 5.23074166  | 0.55236821  |   |             |             |             |
| C | -0.44153094 | 5.94734383  | -1.07433756 |   |             |             |             |
| H | -1.40192612 | 6.33165451  | -1.44132539 |   |             |             |             |
| H | 0.21758051  | 5.81220125  | -1.94110456 |   |             |             |             |
| H | 0.00257566  | 6.71489831  | -0.42843011 |   |             |             |             |
| O | -3.19388963 | 0.68689610  | 2.64698659  |   |             |             |             |
| C | -4.08754810 | 1.77763957  | 2.98363525  |   |             |             |             |
| C | -4.58824497 | 1.50242485  | 4.40754881  |   |             |             |             |
| C | -3.45355626 | 0.64874438  | 4.99695374  |   |             |             |             |
| C | -3.03603063 | -0.18706397 | 3.78951620  |   |             |             |             |
| H | -1.99553838 | -0.51866015 | 3.80615278  |   |             |             |             |
| H | -3.69014138 | -1.06151103 | 3.66074319  |   |             |             |             |
| H | -2.62162037 | 1.28577944  | 5.31400795  |   |             |             |             |
| H | -3.77086828 | 0.03439563  | 5.84530113  |   |             |             |             |
| H | -4.76924756 | 2.42553088  | 4.96598705  |   |             |             |             |
| H | -5.52400443 | 0.93108661  | 4.38449564  |   |             |             |             |
| H | -4.89222310 | 1.80825301  | 2.24156614  |   |             |             |             |
| H | -3.51760986 | 2.71163452  | 2.92884353  |   |             |             |             |
| C | 1.47584569  | -1.06768625 | 3.56642985  |   |             |             |             |
| H | 2.14813797  | -0.90297293 | 4.40358130  |   |             |             |             |
| C | 1.19047863  | -2.48931694 | 3.16815749  |   |             |             |             |
| H | 0.68654686  | -2.52036616 | 2.19763033  |   |             |             |             |
| H | 0.54752489  | -3.01266023 | 3.89433768  |   |             |             |             |
| H | 2.11204200  | -3.08442232 | 3.09038798  |   |             |             |             |
| O | 1.98452558  | 0.06818347  | -0.42426407 |   |             |             |             |
| C | 2.80322160  | -1.08848857 | -0.15066611 |   |             |             |             |
| C | 4.12651946  | -0.83092642 | -0.87199106 |   |             |             |             |
| C | 3.65885866  | -0.04366147 | -2.10637567 |   |             |             |             |
| C | 2.53600721  | 0.82316969  | -1.52938974 |   |             |             |             |
| H | 2.92063052  | 1.77319499  | -1.13641018 |   |             |             |             |
| H | 1.72707521  | 1.02604332  | -2.23284663 |   |             |             |             |
| H | 4.45159708  | 0.55228513  | -2.56919892 |   |             |             |             |
| H | 3.26068452  | -0.72801772 | -2.86494341 |   |             |             |             |
| H | 4.78866544  | -0.21446747 | -0.25181941 |   |             |             |             |
| H | 4.65628223  | -1.75610145 | -1.11969299 |   |             |             |             |
| H | 2.30368794  | -1.98260324 | -0.54779881 |   |             |             |             |

## Part 7: 6 Ground State Computations

Geometries are optimized at the B3LYP level of theory using the 6-31G(d) basis set. Energies are defined as follows:  $G$  is the sum of electronic and thermal free energies calculated at the B3LYP level of theory ( $T = 195$  K).  $G_{\text{MP2}}$  is derived from an MP2 SP calculation corresponding to the DFT-optimized geometry and includes a thermal correction from the DFT calculation.

**Table 51.** Geometric coordinates and thermally corrected MP2 energies for **6** trans disolvated dimer with two THF

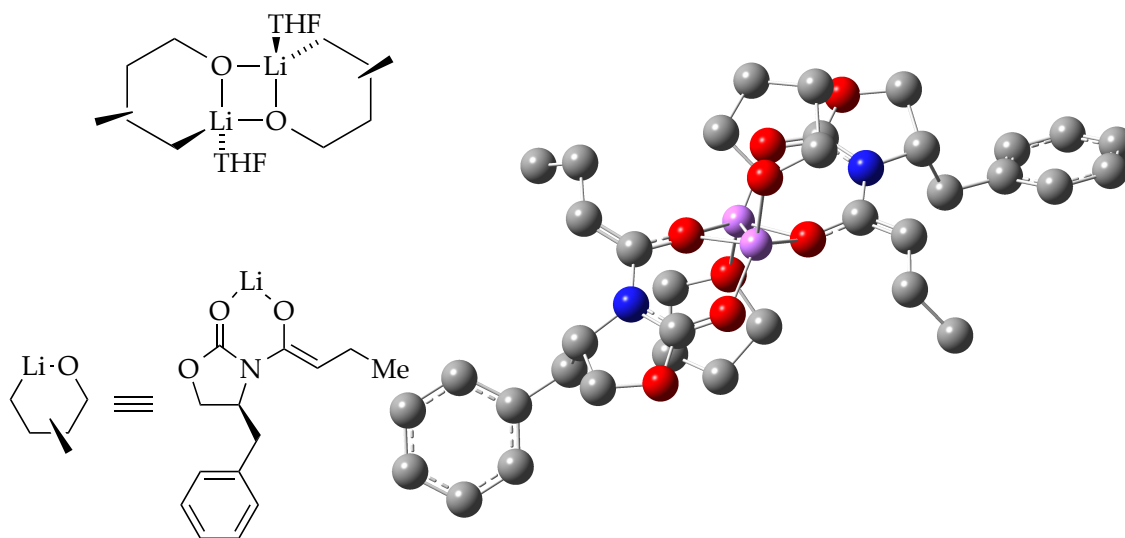

$G = -2126.597799$  Hartree

$G_{\text{MP2}} = -1330208.34$  kcal/mol

$\Delta G_{\text{MP2}} = 0.610451832$  kcal/mol Li vs. **6**  $D_{2d}$  tetramer

| Atom | X          | Y           | Z          | Atom | X           | Y           | Z           |
|------|------------|-------------|------------|------|-------------|-------------|-------------|
| Li   | 0.00000000 | 0.00000000  | 0.00000000 | H    | 4.58841284  | -1.50851022 | 1.44389266  |
| O    | 0.00000000 | 0.00000000  | 1.93137090 | C    | 4.38820692  | -1.95079010 | -0.71792228 |
| C    | 1.07112132 | 0.00000000  | 2.52826923 | H    | 3.61019840  | -1.79979087 | -1.47432302 |
| O    | 1.12827218 | 0.44855761  | 3.81465172 | H    | 4.57749525  | -3.03681224 | -0.68633445 |
| C    | 2.43026038 | 0.15849867  | 4.35162481 | C    | 5.68205539  | -1.25405686 | -1.17484966 |
| H    | 2.36579817 | -0.76227708 | 4.94304630 | H    | 6.48623003  | -1.38708841 | -0.43928843 |
| H    | 2.73052883 | 0.98380914  | 4.99914224 | H    | 6.03756326  | -1.65742634 | -2.13127943 |
| C    | 3.32305898 | -0.00884992 | 3.11522137 | H    | 5.52229358  | -0.17620453 | -1.29738214 |
| H    | 4.03467606 | -0.82256129 | 3.27016921 | O    | 1.70314841  | -0.84628305 | -0.09210844 |
| N    | 2.31630022 | -0.39009858 | 2.11440795 | Li   | 0.74025655  | -2.20689892 | -1.03357623 |
| C    | 2.64790166 | -0.92956468 | 0.79440992 | O    | 0.73897278  | -2.56695519 | -2.92928651 |
| C    | 3.89073507 | -1.45577322 | 0.61422695 | C    | -0.22109605 | -2.28505878 | -3.63646267 |

|   |             |             |             |   |             |            |             |
|---|-------------|-------------|-------------|---|-------------|------------|-------------|
| O | -0.13344265 | -2.40981118 | -4.99129675 | C | 5.06016938  | 2.65011669 | 4.60467266  |
| C | -1.44708567 | -2.26622268 | -5.55769413 | H | 4.13793026  | 3.22682934 | 4.63456847  |
| H | -1.84676193 | -3.26545302 | -5.76420386 | H | 5.96107801  | 3.74863579 | 6.22336046  |
| H | -1.36299764 | -1.71198207 | -6.49409139 | H | 8.08797216  | 2.45946290 | 6.15064839  |
| C | -2.26045630 | -1.52961970 | -4.48030006 | H | 8.37111720  | 0.64835917 | 4.46779644  |
| H | -3.25970355 | -1.96447064 | -4.40024925 | H | 6.54663259  | 0.13066502 | 2.88068176  |
| N | -1.46470835 | -1.84014945 | -3.28706980 | O | 0.08368522  | 1.86457362 | -0.71867156 |
| C | -1.87788729 | -1.50273863 | -1.92153923 | C | 1.25271738  | 2.16816326 | -1.51229528 |
| C | -3.20946389 | -1.50956312 | -1.64967534 | H | 1.75292060  | 3.05334442 | -1.09349635 |
| C | -3.78686934 | -1.13638724 | -0.31125418 | H | 1.91967481  | 1.30637735 | -1.44227148 |
| H | -2.97106531 | -0.92363713 | 0.38870048  | C | 0.71241253  | 2.44620503 | -2.91226055 |
| H | -4.33839650 | -1.99116277 | 0.11300189  | C | -0.60903941 | 3.16809574 | -2.59991856 |
| C | -4.74490111 | 0.06728040  | -0.36519044 | C | -1.09046595 | 2.45975229 | -1.32278288 |
| H | -5.57738393 | -0.11880685 | -1.05616570 | H | -1.79793722 | 1.65151681 | -1.53866278 |
| H | -5.17364866 | 0.28263668  | 0.62166030  | H | -1.54820614 | 3.14508556 | -0.60144494 |
| H | -4.22478865 | 0.96819443  | -0.71255255 | H | -1.34082259 | 3.10092700 | -3.41043991 |
| H | -3.91111260 | -1.81678946 | -2.42010954 | H | -0.42310002 | 4.23047649 | -2.40399163 |
| O | -0.90470268 | -1.22436374 | -1.10836940 | H | 1.39834117  | 3.04440136 | -3.51983758 |
| C | -2.38521076 | -0.00490417 | -4.70993240 | H | 0.52438105  | 1.50036248 | -3.43316764 |
| H | -2.76323502 | 0.42730607  | -3.77671229 |   |             |            |             |
| H | -1.38101678 | 0.40288288  | -4.88062192 |   |             |            |             |
| C | -3.30058250 | 0.34463182  | -5.86197500 |   |             |            |             |
| C | -2.78967090 | 0.75926614  | -7.09921229 |   |             |            |             |
| C | -3.64140745 | 1.05073083  | -8.16702546 |   |             |            |             |
| C | -5.02273143 | 0.93078831  | -8.01324865 |   |             |            |             |
| C | -5.54629532 | 0.52262471  | -6.78406005 |   |             |            |             |
| C | -4.69249459 | 0.23409433  | -5.72008058 |   |             |            |             |
| H | -5.10899927 | -0.07106477 | -4.76214576 |   |             |            |             |
| H | -6.62156244 | 0.43447473  | -6.65218120 |   |             |            |             |
| H | -5.68743668 | 1.15831455  | -8.84219037 |   |             |            |             |
| H | -3.22396873 | 1.37442935  | -9.11691935 |   |             |            |             |
| H | -1.71407769 | 0.86597643  | -7.22477437 |   |             |            |             |
| O | 0.50958489  | -3.87830401 | 0.04003657  |   |             |            |             |
| C | 1.48812923  | -4.43182146 | 0.93948413  |   |             |            |             |
| H | 1.68973030  | -5.47202413 | 0.64936094  |   |             |            |             |
| H | 2.40069580  | -3.84261158 | 0.82689496  |   |             |            |             |
| C | 0.87013001  | -4.35118527 | 2.35755837  |   |             |            |             |
| H | 0.89990411  | -5.32905801 | 2.84892166  |   |             |            |             |
| H | 1.41545703  | -3.64672137 | 2.99220640  |   |             |            |             |
| C | -0.58531313 | -3.87930168 | 2.10938590  |   |             |            |             |
| C | -0.78257720 | -4.13781825 | 0.61412956  |   |             |            |             |
| H | -1.49434087 | -3.46799238 | 0.12980891  |   |             |            |             |
| H | -1.06537898 | -5.18311535 | 0.41561419  |   |             |            |             |
| H | -1.31557556 | -4.41195701 | 2.72638974  |   |             |            |             |
| H | -0.68386131 | -2.80820472 | 2.30964466  |   |             |            |             |
| C | 4.07968339  | 1.27761267  | 2.70480771  |   |             |            |             |
| H | 4.46914304  | 1.11308302  | 1.69455832  |   |             |            |             |
| H | 3.35554181  | 2.09984824  | 2.64732365  |   |             |            |             |
| C | 5.20214162  | 1.62850165  | 3.65585101  |   |             |            |             |
| C | 6.41029400  | 0.91524860  | 3.62226628  |   |             |            |             |
| C | 7.44134286  | 1.20943477  | 4.51385435  |   |             |            |             |
| C | 7.28384791  | 2.22727975  | 5.45762122  |   |             |            |             |
| C | 6.09063303  | 2.94887110  | 5.49881543  |   |             |            |             |

**Table 52.** Geometric coordinates and thermally corrected MP2 energies for 6 cis disolvated dimer with two THF

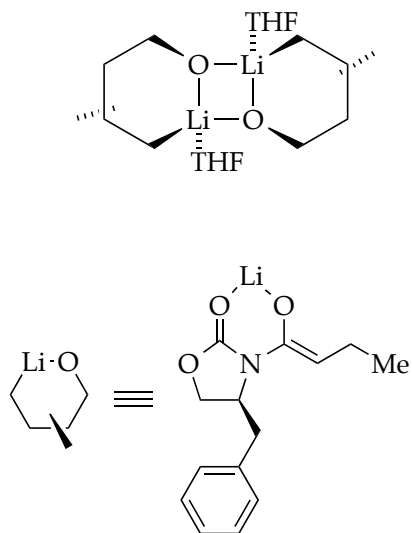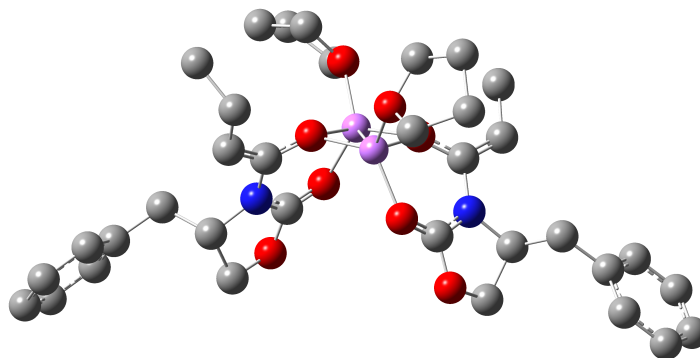

G = - 2126.59718 Hartree

G<sub>MP2</sub> = - 1330205.291 kcal/mol

ΔG<sub>MP2</sub> = 2.13512188 kcal/mol Li vs. 6 D<sub>2d</sub> tetramer

| Atom | X           | Y           | Z           | Atom | X           | Y           | Z           |
|------|-------------|-------------|-------------|------|-------------|-------------|-------------|
| Li   | 0.00000000  | 0.00000000  | 0.00000000  | C    | -1.00222845 | -3.34661783 | -4.08697370 |
| O    | 0.00000000  | 0.00000000  | 1.90304040  | H    | -1.94275996 | -2.78833870 | -4.04352687 |
| C    | 1.00651828  | 0.00000000  | 2.72648419  | H    | -0.23448140 | -2.65359017 | -4.45318679 |
| N    | 1.37391908  | -1.31816589 | 3.24403447  | C    | -1.12614743 | -4.52784067 | -5.02467389 |
| C    | 2.56504891  | -1.58536119 | 4.06094667  | C    | -0.13012993 | -4.81166091 | -5.96897424 |
| C    | 2.72719593  | -3.08783450 | 3.80791528  | C    | -0.23499983 | -5.91791830 | -6.81488664 |
| H    | 3.35477804  | -3.29565063 | 2.93386282  | C    | -1.34242136 | -6.76177826 | -6.72867177 |
| H    | 3.10211830  | -3.64157099 | 4.66990343  | C    | -2.34495263 | -6.48947892 | -5.79478532 |
| O    | 1.38651262  | -3.53528183 | 3.52775819  | C    | -2.23660084 | -5.38301668 | -4.95298182 |
| C    | 0.66045531  | -2.47173956 | 3.07707916  | H    | -3.02832644 | -5.17432603 | -4.23627008 |
| O    | -0.47067333 | -2.65241684 | 2.63584958  | H    | -3.21518391 | -7.13695938 | -5.72528926 |
| Li   | -1.41790513 | -1.25033788 | 1.71302490  | H    | -1.42742217 | -7.62228513 | -7.38679981 |
| O    | -1.51884284 | -1.13246482 | -0.18123010 | H    | 0.54732768  | -6.11640474 | -7.54286219 |
| C    | -1.77680294 | -2.03527577 | -1.08002260 | H    | 0.73145860  | -4.15211781 | -6.05016707 |
| N    | -0.59689551 | -2.60901757 | -1.72781244 | C    | -3.00230677 | -2.49617700 | -1.44566563 |
| C    | -0.62676231 | -3.75975421 | -2.64029549 | C    | -4.27527796 | -2.02659496 | -0.79615915 |
| C    | 0.82361779  | -4.23719861 | -2.51205865 | H    | -4.96049479 | -1.61381554 | -1.55478798 |
| H    | 0.95095446  | -4.96342228 | -1.70126118 | H    | -4.04334715 | -1.20732525 | -0.10745721 |
| H    | 1.23717708  | -4.64222691 | -3.43673158 | C    | -5.01867227 | -3.13785323 | -0.03237398 |
| O    | 1.55061631  | -3.03978646 | -2.17467412 | H    | -5.95697307 | -2.76798294 | 0.40206832  |
| C    | 0.68590013  | -2.15686801 | -1.59735200 | H    | -5.26849503 | -3.97734467 | -0.69401869 |
| O    | 1.11927576  | -1.12492947 | -1.09303964 | H    | -4.39667038 | -3.53481332 | 0.77877267  |
| H    | -1.32825346 | -4.50805688 | -2.26441633 | H    | -3.09671485 | -3.26129245 | -2.20854983 |



|   |             |             |            |   |             |             |             |
|---|-------------|-------------|------------|---|-------------|-------------|-------------|
| O | -3.01229464 | -0.76505211 | 2.81841091 | H | 6.83496415  | -1.84370224 | 8.50939696  |
| C | -3.60548222 | -1.74034989 | 3.71127061 | H | 6.57200698  | 0.12243802  | 7.00676734  |
| C | -3.86687405 | -1.00851521 | 5.03874196 | H | 4.50873167  | 0.40333957  | 5.67735318  |
| C | -2.89398054 | 0.18046007  | 4.97031656 | C | 1.74445476  | 1.07458758  | 3.11184252  |
| C | -2.91804803 | 0.51492032  | 3.48113909 | H | 2.56412834  | 0.95491961  | 3.81172767  |
| H | -2.01294366 | 1.00151709  | 3.11127812 | C | 1.46554364  | 2.47182564  | 2.62753792  |
| H | -3.79641927 | 1.12297072  | 3.22056120 | H | 0.72916317  | 2.43227116  | 1.81790058  |
| H | -1.88476393 | -0.12636233 | 5.26812454 | H | 2.37866148  | 2.91031022  | 2.19430361  |
| H | -3.19733125 | 1.02292111  | 5.59951046 | C | 0.95831581  | 3.41415326  | 3.73517772  |
| H | -3.69976571 | -1.65429701 | 5.90593484 | H | 1.67586100  | 3.47626685  | 4.56345333  |
| H | -4.90136162 | -0.64844523 | 5.08298767 | H | 0.79912734  | 4.43226301  | 3.35624884  |
| H | -4.52025323 | -2.12751372 | 3.25057150 | H | 0.00995626  | 3.05211641  | 4.15008080  |
| H | -2.88970707 | -2.56160334 | 3.82198355 | O | -0.19978885 | 1.74298418  | -0.94636597 |
| H | 3.41417414  | -1.02072259 | 3.66932473 | C | -1.57884097 | 2.14830163  | -1.15164071 |
| C | 2.33303534  | -1.24440276 | 5.55581031 | C | -1.68279865 | 2.60768176  | -2.61740468 |
| H | 1.96090873  | -0.21650460 | 5.61069428 | C | -0.45033658 | 1.96097731  | -3.27310906 |
| H | 1.53505840  | -1.89572962 | 5.93380831 | C | 0.56746790  | 2.00936584  | -2.13604742 |
| C | 3.57937772  | -1.40617159 | 6.39830964 | H | 1.03401762  | 3.00204427  | -2.05640717 |
| C | 4.61776193  | -0.46492144 | 6.32411416 | H | 1.34825360  | 1.24799475  | -2.19670422 |
| C | 5.78165806  | -0.62045360 | 7.07618784 | H | -0.11190361 | 2.48997385  | -4.16945576 |
| C | 5.92941566  | -1.72314938 | 7.92095060 | H | -0.65888294 | 0.91959727  | -3.54384602 |
| C | 4.90385401  | -2.66465925 | 8.00871966 | H | -1.61821151 | 3.69976303  | -2.68577736 |
| C | 3.74034472  | -2.50530411 | 7.25291963 | H | -2.62483829 | 2.29839504  | -3.07931199 |
| H | 2.94035553  | -3.23814071 | 7.33630260 | H | -2.20271662 | 1.27585267  | -0.93569272 |
| H | 5.00526285  | -3.52256811 | 8.66834375 | H | -1.81857196 | 2.94698385  | -0.44128744 |

**Table 53.** Geometric coordinates and thermally corrected MP2 energies for **6** unsymmetrically solvated dimer with two THF

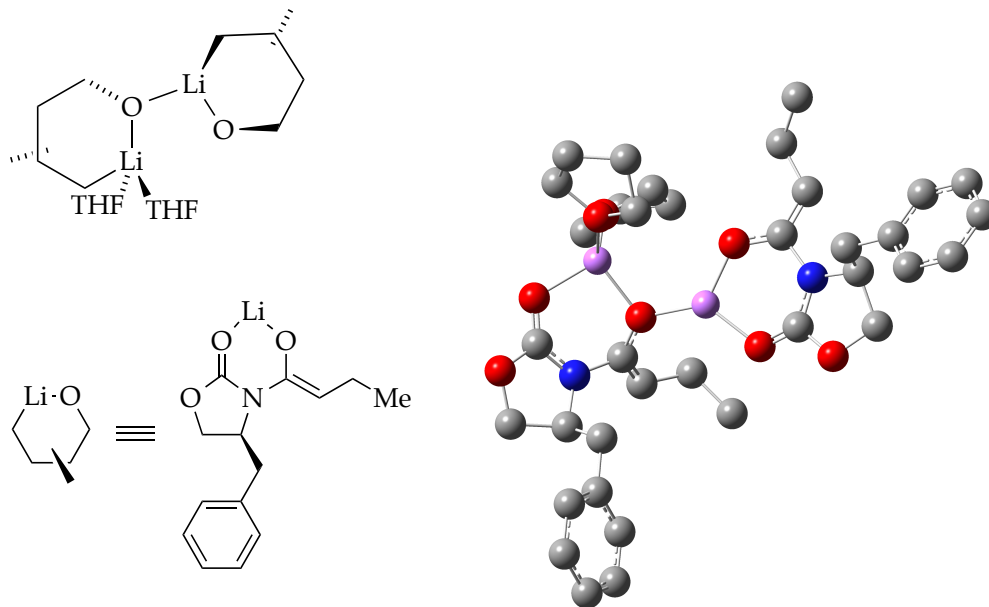

$G = -2126.589616$  Hartree

$G_{\text{MP2}} = -1330200.128$  kcal/mol

$\Delta G_{\text{MP2}} = 4.716502092$  kcal/mol Li vs. **6**  $D_{2d}$  tetramer

| Atom | X           | Y           | Z           | Atom | X           | Y           | Z           |
|------|-------------|-------------|-------------|------|-------------|-------------|-------------|
| Li   | 0.00000000  | 0.00000000  | 0.00000000  | C    | -1.20840330 | -1.67494359 | -1.78413681 |
| O    | 0.00000000  | 0.00000000  | 3.73418690  | O    | -0.64568028 | -0.58307555 | -1.74017617 |
| C    | 0.18254924  | 0.00000000  | 5.01380745  | H    | -1.52373002 | -4.78297115 | -1.33363912 |
| N    | -0.57700271 | -1.01877831 | 5.76603644  | C    | -3.08436864 | -3.84034598 | -0.15891148 |
| C    | -1.08627112 | -0.81258810 | 7.12877811  | H    | -2.57052387 | -3.95234317 | 0.80284022  |
| C    | -1.60076658 | -2.22464903 | 7.44958227  | H    | -3.59836489 | -2.87157079 | -0.13978841 |
| H    | -0.85601129 | -2.82428119 | 7.98493805  | C    | -4.07741877 | -4.96471318 | -0.35576747 |
| H    | -2.53875234 | -2.23196011 | 8.00718373  | C    | -5.35654271 | -4.72346650 | -0.87469376 |
| O    | -1.82902884 | -2.82852960 | 6.16305150  | C    | -6.25793552 | -5.77053224 | -1.07914321 |
| C    | -1.10489563 | -2.15137579 | 5.23018272  | C    | -5.89151536 | -7.07987740 | -0.76693780 |
| O    | -1.00909789 | -2.60202726 | 4.08842005  | C    | -4.62085277 | -7.33440657 | -0.24527393 |
| Li   | -0.36600482 | -1.47081911 | 2.72663855  | C    | -3.72422614 | -6.28591366 | -0.04190541 |
| O    | -0.22002905 | -1.65682445 | 0.90198907  | H    | -2.74151535 | -6.49019159 | 0.37834841  |
| C    | -0.12976197 | -2.74443510 | 0.17483776  | H    | -4.33034438 | -8.35009593 | 0.01033931  |
| N    | -0.99486385 | -2.76451287 | -1.00272514 | H    | -6.59215256 | -7.89587467 | -0.92219442 |
| C    | -1.99958305 | -3.80127264 | -1.26059688 | H    | -7.24739483 | -5.56071404 | -1.47705538 |
| C    | -2.50433224 | -3.33824735 | -2.64026889 | H    | -5.65526587 | -3.70316119 | -1.10644867 |
| H    | -1.98457038 | -3.84609779 | -3.45998495 | C    | 0.64100696  | -3.83789740 | 0.37871628  |
| H    | -3.58195238 | -3.44805247 | -2.77095009 | C    | 1.53734821  | -4.04926788 | 1.56761449  |
| O    | -2.17877052 | -1.93328012 | -2.70086501 | H    | 2.54687324  | -4.31774174 | 1.21970247  |

|   |             |             |             |   |             |             |             |
|---|-------------|-------------|-------------|---|-------------|-------------|-------------|
| H | 1.64885999  | -3.10631981 | 2.11789616  | H | 2.05407373  | 4.14195768  | 5.43907761  |
| C | 1.04435246  | -5.14471054 | 2.53149058  | H | 0.40425845  | 3.60230776  | 5.81912210  |
| H | 1.76434636  | -5.30965803 | 3.34310552  | O | 1.89117418  | 0.56955771  | 0.00245804  |
| H | 0.08604963  | -4.86422927 | 2.98028841  | C | 2.46237043  | 0.86055514  | 1.30764891  |
| H | 0.91048456  | -6.09863442 | 2.00574592  | C | 3.67513306  | -0.06037775 | 1.43458232  |
| H | 0.60442813  | -4.63313691 | -0.36243485 | C | 4.14944365  | -0.17070683 | -0.02259812 |
| H | -0.27203351 | -0.54515908 | 7.80567398  | C | 2.82341729  | -0.21206443 | -0.78555109 |
| C | -2.17257179 | 0.28788037  | 7.17322844  | H | 2.43834491  | -1.23582087 | -0.86640014 |
| H | -1.74619321 | 1.17312762  | 6.68902687  | H | 2.87472744  | 0.22724312  | -1.78625603 |
| H | -3.02687632 | -0.04055783 | 6.56832313  | H | 4.76516076  | -1.05471861 | -0.21401908 |
| C | -2.61485531 | 0.61649077  | 8.58160000  | H | 4.72941261  | 0.71625938  | -0.30485833 |
| C | -1.79192141 | 1.38384543  | 9.42054102  | H | 3.36588292  | -1.04206744 | 1.81114740  |
| C | -2.17099358 | 1.66666512  | 10.73224218 | H | 4.43473016  | 0.34217444  | 2.11128479  |
| C | -3.38485847 | 1.18727014  | 11.23083354 | H | 2.75742144  | 1.91839504  | 1.32423233  |
| C | -4.21560098 | 0.42802306  | 10.40654598 | H | 1.69749918  | 0.68813687  | 2.06990897  |
| C | -3.83170929 | 0.14641496  | 9.09351617  | O | -1.01844484 | 1.59748614  | 0.49187624  |
| H | -4.49135628 | -0.43546953 | 8.45302769  | C | -1.77900094 | 1.90667279  | 1.68495178  |
| H | -5.16577160 | 0.05710814  | 10.78211881 | C | -1.85778328 | 3.43127983  | 1.70861770  |
| H | -3.68225611 | 1.40930820  | 12.25219249 | C | -1.95990644 | 3.76531738  | 0.21109186  |
| H | -1.52138796 | 2.26658467  | 11.36440892 | C | -1.03988851 | 2.71593895  | -0.42588264 |
| H | -0.85071242 | 1.77018399  | 9.03459315  | H | -0.01226916 | 3.08329913  | -0.53441253 |
| C | 0.96100447  | 0.83925722  | 5.74963101  | H | -1.38936026 | 2.35992730  | -1.39988428 |
| H | 1.07029038  | 0.67868119  | 6.81823357  | H | -1.65145511 | 4.78713812  | -0.02972139 |
| C | 1.72112080  | 1.99115505  | 5.15308175  | H | -2.99124906 | 3.63339226  | -0.13660873 |
| H | 1.44488295  | 2.08894478  | 4.09728565  | H | -0.94052950 | 3.85197378  | 2.13739300  |
| H | 2.80736634  | 1.79730043  | 5.16839075  | H | -2.70723991 | 3.79907214  | 2.29221243  |
| C | 1.46391414  | 3.32535193  | 5.87504222  | H | -2.77986432 | 1.46012707  | 1.59246537  |
| H | 1.73038012  | 3.25773945  | 6.93794416  | H | -1.25826590 | 1.45797799  | 2.53482395  |

**Table 54.** Geometric coordinates and thermally corrected MP2 energies for **6** dimer with three THF

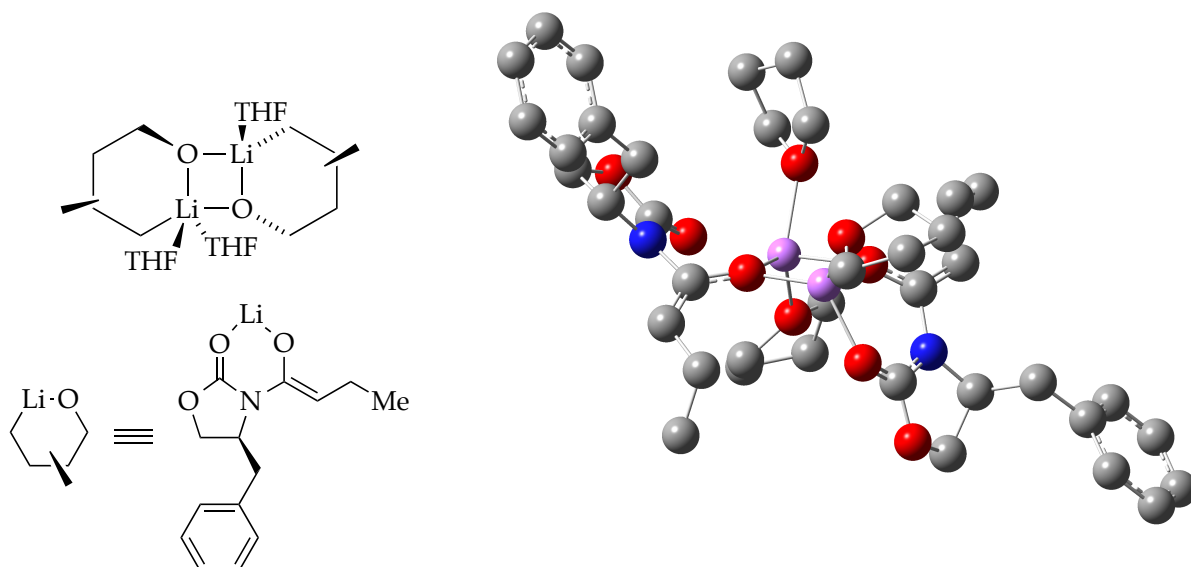

G = - 2358.937168 Hartree

G<sub>MP2</sub> = - 1475522.775 kcal/mol

ΔG<sub>MP2</sub> = -0.461912607 kcal/mol Li vs. **6** D<sub>2d</sub> tetramer

| Atom | X           | Y           | Z           | Atom | X           | Y           | Z           |
|------|-------------|-------------|-------------|------|-------------|-------------|-------------|
| Li   | 0.00000000  | 0.00000000  | 0.00000000  | C    | -6.06192569 | -0.12231777 | -2.26838214 |
| O    | 0.00000000  | 0.00000000  | 2.09927980  | C    | -6.58378541 | 1.08624406  | -2.74880081 |
| C    | 0.98404283  | 0.00000000  | 2.93885918  | C    | -7.87693125 | 1.15382856  | -3.27214974 |
| N    | 1.35832435  | -1.32043239 | 3.46369260  | C    | -8.67127477 | 0.00818892  | -3.32399789 |
| C    | 2.57338415  | -1.60175241 | 4.23850864  | C    | -8.16549371 | -1.20308507 | -2.84572897 |
| C    | 2.70975266  | -3.10490850 | 3.97496200  | C    | -6.87429526 | -1.26549867 | -2.32292112 |
| H    | 3.29139010  | -3.31799123 | 3.07059198  | H    | -6.49097233 | -2.20998062 | -1.94210435 |
| H    | 3.12119010  | -3.66435293 | 4.81646347  | H    | -8.77999742 | -2.09921675 | -2.87485790 |
| O    | 1.35176224  | -3.53636783 | 3.76193650  | H    | -9.67848800 | 0.05845839  | -3.72886430 |
| C    | 0.62072021  | -2.46210884 | 3.34112798  | H    | -8.26342019 | 2.10274340  | -3.63508290 |
| O    | -0.53481592 | -2.62189941 | 2.96091757  | H    | -5.97466425 | 1.98664001  | -2.70111741 |
| Li   | -1.39610397 | -1.24502847 | 1.90478164  | C    | -2.56487364 | -3.14501309 | -0.94676072 |
| O    | -1.50749987 | -1.22538105 | 0.04083159  | C    | -2.46766886 | -4.12456698 | 0.18934361  |
| C    | -2.10329403 | -1.87027090 | -0.91734447 | H    | -3.47357060 | -4.39715957 | 0.55247880  |
| N    | -2.34605999 | -1.07797159 | -2.12916150 | H    | -1.94734657 | -3.66475840 | 1.03581994  |
| C    | -3.67168516 | -0.88699912 | -2.71811903 | C    | -1.73165262 | -5.41965863 | -0.19691834 |
| C    | -3.30155161 | -0.02889531 | -3.94290900 | H    | -1.70329692 | -6.12753598 | 0.64088078  |
| H    | -3.16724059 | -0.63904392 | -4.84320818 | H    | -2.22341368 | -5.91990782 | -1.04136253 |
| H    | -4.01915106 | 0.76690206  | -4.15110695 | H    | -0.69979121 | -5.20348550 | -0.49638878 |
| O    | -2.03579217 | 0.57085412  | -3.60649595 | H    | -2.99639669 | -3.50971544 | -1.87684888 |
| C    | -1.45776061 | -0.16756747 | -2.60340286 | O    | -3.07112937 | -0.81308062 | 2.95318520  |
| O    | -0.30329665 | 0.03221562  | -2.25223151 | C    | -3.77653166 | -1.91354246 | 3.58021572  |
| H    | -4.09175235 | -1.84570288 | -3.03499506 | C    | -4.07775314 | -1.46992231 | 5.02044510  |
| C    | -4.65176731 | -0.21217507 | -1.72930974 | C    | -3.01233193 | -0.38950979 | 5.27094197  |
| H    | -4.63188929 | -0.80387410 | -0.80686466 | C    | -2.91172910 | 0.26784589  | 3.89641471  |
| H    | -4.27044470 | 0.78612285  | -1.48168107 | H    | -1.94914174 | 0.73937309  | 3.68598519  |

|   |             |             |             |   |             |            |             |
|---|-------------|-------------|-------------|---|-------------|------------|-------------|
| H | -3.71701135 | 1.00195097  | 3.74596210  | H | -1.66336842 | 4.63050887 | 0.38552279  |
| H | -2.05358828 | -0.84793404 | 5.53860164  | H | -3.14661372 | 3.87712195 | -0.22149817 |
| H | -3.28997646 | 0.31713193  | 6.05920703  | H | -2.36241391 | 1.65284906 | 0.33911802  |
| H | -4.02341533 | -2.30250231 | 5.72810888  | H | -1.46678161 | 2.55085260 | 1.58228095  |
| H | -5.08168457 | -1.03462636 | 5.08951530  |   |             |            |             |
| H | -4.68079994 | -2.12541893 | 3.00013979  |   |             |            |             |
| H | -3.11973158 | -2.78859523 | 3.54824625  |   |             |            |             |
| H | 3.41143951  | -1.03790466 | 3.82222233  |   |             |            |             |
| C | 2.39869942  | -1.27793188 | 5.74592200  |   |             |            |             |
| H | 2.02577473  | -0.25266837 | 5.83176292  |   |             |            |             |
| H | 1.61768668  | -1.93657413 | 6.14586310  |   |             |            |             |
| C | 3.67755381  | -1.44719388 | 6.53708318  |   |             |            |             |
| C | 4.72040038  | -0.51579854 | 6.41493954  |   |             |            |             |
| C | 5.91296471  | -0.67831897 | 7.11910419  |   |             |            |             |
| C | 6.08576726  | -1.77816965 | 7.96294480  |   |             |            |             |
| C | 5.05619921  | -2.70957774 | 8.09827890  |   |             |            |             |
| C | 3.86390950  | -2.54329072 | 7.39023701  |   |             |            |             |
| H | 3.06147819  | -3.26836495 | 7.50982187  |   |             |            |             |
| H | 5.17711886  | -3.56521452 | 8.75755591  |   |             |            |             |
| H | 7.01389389  | -1.90407509 | 8.51392460  |   |             |            |             |
| H | 6.70650449  | 0.05690108  | 7.01320496  |   |             |            |             |
| H | 4.59231327  | 0.34998155  | 5.76828080  |   |             |            |             |
| C | 1.71412617  | 1.07111147  | 3.36080515  |   |             |            |             |
| H | 2.49280471  | 0.94407361  | 4.10497072  |   |             |            |             |
| C | 1.45755695  | 2.47792117  | 2.88727928  |   |             |            |             |
| H | 0.93700916  | 2.44613867  | 1.92450013  |   |             |            |             |
| H | 0.78291850  | 3.01090337  | 3.58161457  |   |             |            |             |
| C | 2.74295698  | 3.30905053  | 2.75218048  |   |             |            |             |
| H | 2.52467073  | 4.33905436  | 2.44320374  |   |             |            |             |
| H | 3.28629443  | 3.36040426  | 3.70511370  |   |             |            |             |
| H | 3.42339579  | 2.87131930  | 2.01134872  |   |             |            |             |
| O | 1.92120760  | -0.60479262 | -0.31927707 |   |             |            |             |
| C | 3.02224536  | 0.32012804  | -0.20873689 |   |             |            |             |
| C | 4.21683944  | -0.39223808 | -0.84383640 |   |             |            |             |
| C | 3.53737735  | -1.20894086 | -1.95452681 |   |             |            |             |
| C | 2.22604746  | -1.63622531 | -1.28746656 |   |             |            |             |
| H | 2.33487152  | -2.58760271 | -0.75088295 |   |             |            |             |
| H | 1.38505407  | -1.70677880 | -1.97925421 |   |             |            |             |
| H | 4.13201304  | -2.06318417 | -2.29289102 |   |             |            |             |
| H | 3.33287736  | -0.57157061 | -2.82278245 |   |             |            |             |
| H | 4.69659213  | -1.05861352 | -0.11637671 |   |             |            |             |
| H | 4.97314725  | 0.30558508  | -1.21661740 |   |             |            |             |
| H | 2.77482822  | 1.24072898  | -0.75635861 |   |             |            |             |
| H | 3.14755197  | 0.56236480  | 0.84996573  |   |             |            |             |
| O | -0.39084956 | 2.06845744  | -0.11828132 |   |             |            |             |
| C | -1.63598612 | 2.45729621  | 0.50637641  |   |             |            |             |
| C | -2.05856031 | 3.76984188  | -0.16726265 |   |             |            |             |
| C | -1.38379243 | 3.66848706  | -1.54475799 |   |             |            |             |
| C | -0.06932390 | 2.97235700  | -1.19388193 |   |             |            |             |
| H | 0.68345133  | 3.69316068  | -0.84244869 |   |             |            |             |
| H | 0.34200552  | 2.37753016  | -2.01077870 |   |             |            |             |
| H | -1.23227790 | 4.63966922  | -2.02653643 |   |             |            |             |
| H | -1.96818529 | 3.03543785  | -2.22194732 |   |             |            |             |

**Table 55.** Geometric coordinates and thermally corrected MP2 energies for 6 spirocyclic dimer with two THF

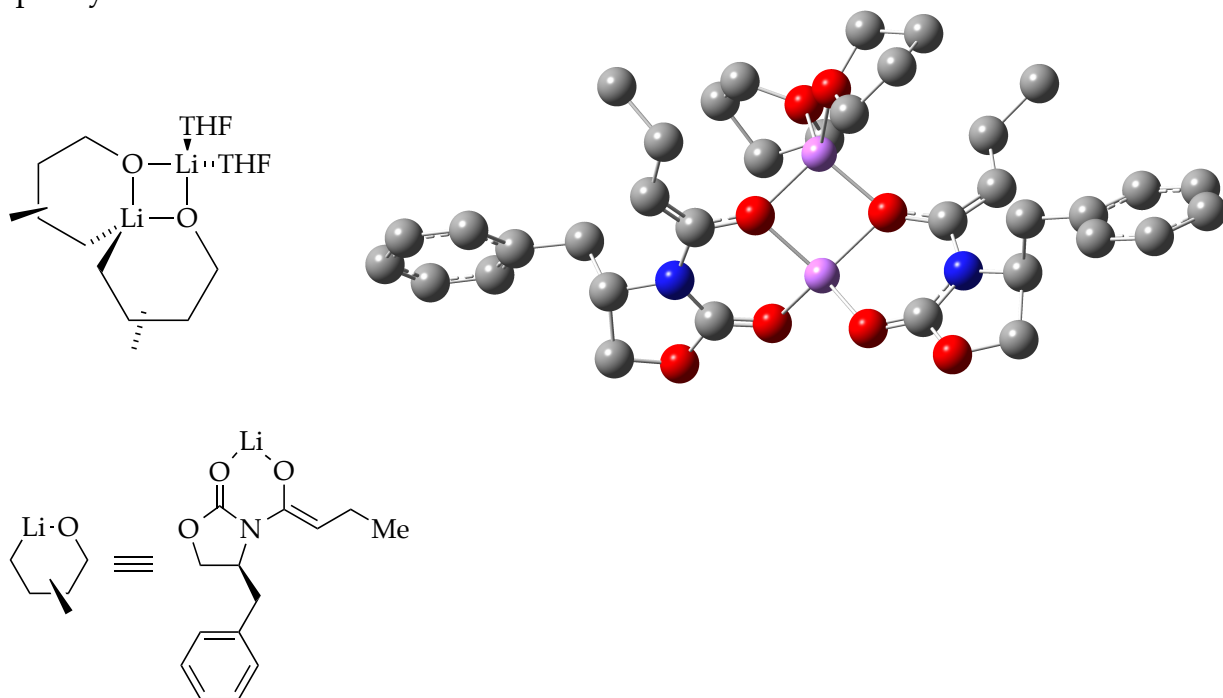

$G = -2126.593455$  Hartree

$G_{\text{MP2}} = -1330207.175$  kcal/mol

$\Delta G_{\text{MP2}} = 1.193116682$  kcal/mol Li vs. 6  $D_{2d}$  tetramer

| Atom | X          | Y           | Z           | Atom | X           | Y           | Z           |
|------|------------|-------------|-------------|------|-------------|-------------|-------------|
| Li   | 0.00000000 | 0.00000000  | 0.00000000  | Li   | 1.47913403  | 1.46328177  | -1.49470886 |
| O    | 0.00000000 | 0.00000000  | 1.91010250  | O    | -0.39169782 | 1.36272574  | -1.28286746 |
| C    | 1.03172090 | 0.00000000  | 2.56771136  | C    | -1.55699077 | 1.65541948  | -1.77315416 |
| O    | 0.97189531 | 0.07790988  | 3.92786664  | N    | -2.48316311 | 0.52567274  | -1.88531865 |
| C    | 2.27540297 | -0.19715318 | 4.46557040  | C    | -3.70291806 | 0.54536955  | -2.70353249 |
| H    | 2.30950246 | -1.24790198 | 4.77526672  | C    | -4.39758180 | -0.72614430 | -2.19769776 |
| H    | 2.43476492 | 0.44103048  | 5.33638711  | H    | -5.09883402 | -0.51691389 | -1.38191549 |
| C    | 3.23964775 | 0.09486386  | 3.30666120  | H    | -4.91095859 | -1.28428278 | -2.98243568 |
| H    | 4.03369208 | -0.65442186 | 3.28136489  | O    | -3.32822352 | -1.53700370 | -1.68353695 |
| N    | 2.33650144 | -0.06905317 | 2.16011075  | C    | -2.27119000 | -0.72990281 | -1.38062732 |
| C    | 2.78987798 | -0.12848285 | 0.76779242  | O    | -1.32433443 | -1.17983611 | -0.74779542 |
| C    | 4.07605049 | -0.51051828 | 0.54576405  | H    | -4.30475601 | 1.42560583  | -2.46659849 |
| H    | 4.68869598 | -0.84873957 | 1.37542680  | C    | -3.38387796 | 0.52221474  | -4.21865466 |
| C    | 4.69242264 | -0.60666476 | -0.82412430 | H    | -2.67994053 | 1.33872147  | -4.41217448 |
| H    | 4.57119449 | -1.62197622 | -1.24020408 | H    | -2.86840249 | -0.41920973 | -4.44663125 |
| H    | 4.16101991 | 0.05839214  | -1.51519367 | C    | -4.61648729 | 0.66861959  | -5.08276803 |
| C    | 6.19030221 | -0.26497440 | -0.83335633 | C    | -5.17385413 | -0.43136799 | -5.74859825 |
| H    | 6.75059492 | -0.92777301 | -0.16135642 | C    | -6.32886695 | -0.29407686 | -6.52169140 |
| H    | 6.62089998 | -0.37308364 | -1.83642731 | C    | -6.94718777 | 0.95074571  | -6.64068795 |
| H    | 6.36581014 | 0.76481428  | -0.49809142 | C    | -6.40065994 | 2.05695448  | -5.98555349 |
| O    | 1.90445931 | 0.20939132  | -0.12138737 | C    | -5.24657658 | 1.91559559  | -5.21582892 |

|   |             |             |             |   |            |            |             |
|---|-------------|-------------|-------------|---|------------|------------|-------------|
| H | -4.82078817 | 2.78482007  | -4.71863248 | O | 2.37668452 | 3.22915861 | -1.26398048 |
| H | -6.87113427 | 3.03235851  | -6.07859680 | C | 3.70258800 | 3.48148420 | -1.77431750 |
| H | -7.84505133 | 1.06055393  | -7.24283564 | C | 4.56129038 | 3.73121458 | -0.53713046 |
| H | -6.74181441 | -1.15983972 | -7.03284825 | C | 3.57917746 | 4.48941123 | 0.37141188  |
| H | -4.69138044 | -1.40349422 | -5.66980917 | C | 2.23798678 | 3.80946851 | 0.06041851  |
| C | -1.99453170 | 2.87647520  | -2.18473577 | H | 1.39199736 | 4.50287764 | 0.04764060  |
| C | -1.15946883 | 4.12627122  | -2.11861938 | H | 2.01346320 | 2.99254193 | 0.75388316  |
| H | -1.48067768 | 4.76036664  | -1.27394495 | H | 3.54776145 | 5.54996386 | 0.09571153  |
| H | -0.11653402 | 3.86067467  | -1.91655392 | H | 3.83804949 | 4.42602049 | 1.43235015  |
| C | -1.23285611 | 4.97118945  | -3.40150696 | H | 5.47073209 | 4.29766095 | -0.75945637 |
| H | -2.26784712 | 5.25787020  | -3.62949982 | H | 4.84684711 | 2.77582834 | -0.08251419 |
| H | -0.64806397 | 5.89518076  | -3.30855887 | H | 3.99814008 | 2.61086078 | -2.36466546 |
| H | -0.85087037 | 4.41267967  | -4.26503480 | H | 3.67554027 | 4.36384987 | -2.42957388 |
| H | -3.01741275 | 3.00050014  | -2.52513118 | C | 3.86462553 | 1.50985219 | 3.34877914  |
| O | 2.00300706  | 0.83227204  | -3.33536773 | H | 4.31349851 | 1.68914289 | 2.36565746  |
| C | 1.23275518  | 1.39658482  | -4.42989291 | H | 3.05604638 | 2.23939348 | 3.48285693  |
| C | 0.78439524  | 0.21166137  | -5.29856776 | C | 4.90111473 | 1.66624303 | 4.43892969  |
| C | 0.81615234  | -0.96205465 | -4.30669212 | C | 6.17477503 | 1.09467442 | 4.29484642  |
| C | 2.02898714  | -0.61224076 | -3.45041554 | C | 7.12859061 | 1.20626523 | 5.30591222  |
| H | 2.96708840  | -0.91395739 | -3.93721745 | C | 6.82643547 | 1.89547511 | 6.48296501  |
| H | 2.00354033  | -1.01755021 | -2.43724375 | C | 5.56631617 | 2.47353403 | 6.63767028  |
| H | 0.91194490  | -1.93722970 | -4.79386881 | C | 4.61357646 | 2.35845606 | 5.62302952  |
| H | -0.08558682 | -0.97117913 | -3.68528887 | H | 3.63694463 | 2.82181370 | 5.74733213  |
| H | 1.49595620  | 0.03906790  | -6.11467476 | H | 5.32332085 | 3.01810798 | 7.54636056  |
| H | -0.20180004 | 0.37756291  | -5.74217964 | H | 7.56995384 | 1.98485297 | 7.27034361  |
| H | 0.38058830  | 1.93224536  | -3.99849198 | H | 8.11055923 | 0.75960326 | 5.17307793  |
| H | 1.86555358  | 2.10859891  | -4.97056030 | H | 6.42220573 | 0.56658717 | 3.37610422  |

**Table 56.** Geometric coordinates and thermally corrected MP2 energies for **6** spirocyclic dimer with with no THF isomer 1

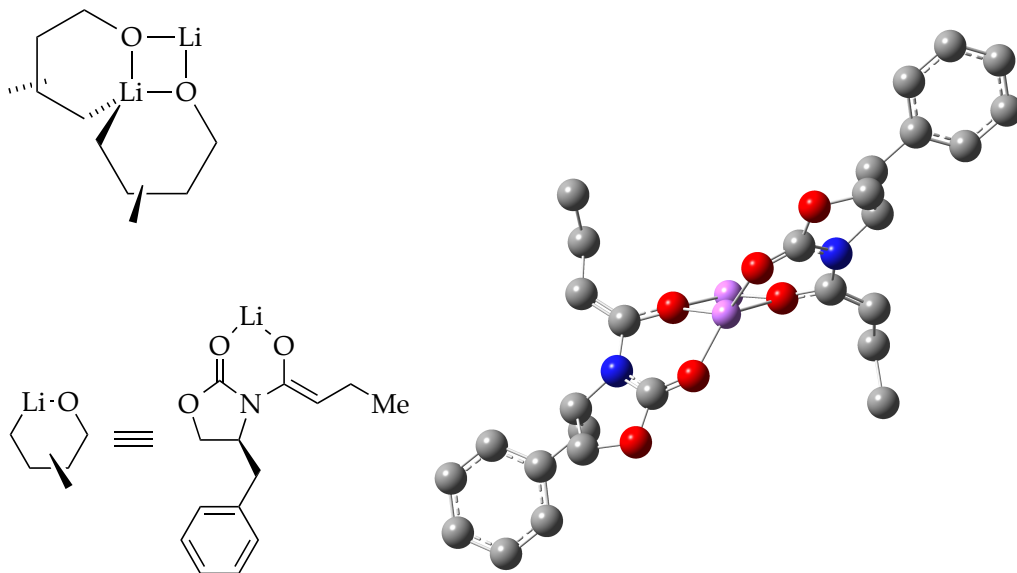

G = -1661.875946 Hartree

$G_{\text{MP2}} = -1039554.194$  kcal/mol

$\Delta G_{\text{MP2}} = 15.39328341$  kcal/mol Li vs. **6**  $D_{2d}$  tetramer

| Atom | X          | Y           | Z           | Atom | X           | Y           | Z           |
|------|------------|-------------|-------------|------|-------------|-------------|-------------|
| Li   | 0.00000000 | 0.00000000  | 0.00000000  | Li   | 1.61495347  | 1.34730143  | -1.29267628 |
| O    | 0.00000000 | 0.00000000  | 1.91522680  | O    | -0.13389916 | 1.37778904  | -1.43607910 |
| C    | 1.01729158 | 0.00000000  | 2.59806762  | C    | -1.26283738 | 1.64190723  | -2.04222192 |
| O    | 0.95279516 | 0.23833870  | 3.93566152  | N    | -2.01568510 | 0.46934491  | -2.46217578 |
| C    | 2.23507662 | -0.05239927 | 4.52177969  | C    | -2.74474163 | 0.38198132  | -3.73347939 |
| H    | 2.19327653 | -1.05385915 | 4.96398552  | C    | -3.45720052 | -0.96746677 | -3.54350002 |
| H    | 2.43205749 | 0.68140601  | 5.30482999  | H    | -4.46925574 | -0.84520270 | -3.14223981 |
| C    | 3.22612903 | 0.01937962  | 3.34816616  | H    | -3.49800324 | -1.57107029 | -4.45148486 |
| H    | 3.96354994 | -0.78340277 | 3.42466220  | O    | -2.66330641 | -1.66556934 | -2.56641128 |
| N    | 2.31245479 | -0.22187600 | 2.22461468  | C    | -1.92646228 | -0.75859951 | -1.87029014 |
| C    | 2.75350243 | -0.39835419 | 0.84897819  | O    | -1.31208481 | -1.09465945 | -0.86492442 |
| C    | 3.89627325 | -1.08802500 | 0.62595162  | H    | -3.47665080 | 1.18935330  | -3.81447353 |
| H    | 4.39458815 | -1.56992700 | 1.46238707  | C    | -1.78693334 | 0.43332334  | -4.94707168 |
| C    | 4.47530549 | -1.31243847 | -0.74389313 | H    | -1.17887727 | 1.33881122  | -4.83869243 |
| H    | 5.56227241 | -1.14198870 | -0.72245060 | H    | -1.10817678 | -0.42654507 | -4.89043115 |
| H    | 4.06026047 | -0.57345419 | -1.44134630 | C    | -2.51618955 | 0.44520541  | -6.27230447 |
| C    | 4.20906219 | -2.72432387 | -1.29899640 | C    | -2.58646989 | -0.70232330 | -7.07353489 |
| H    | 4.61421904 | -3.49325654 | -0.63016369 | C    | -3.28583218 | -0.69234249 | -8.28239463 |
| H    | 3.13239888 | -2.90289088 | -1.39489016 | C    | -3.92876382 | 0.46984711  | -8.70914804 |
| H    | 4.67132172 | -2.86031248 | -2.28517895 | C    | -3.86400643 | 1.62220428  | -7.92214300 |
| O    | 1.98695327 | 0.16813866  | -0.04721048 | C    | -3.16347855 | 1.60834699  | -6.71649376 |



|   |             |             |             |
|---|-------------|-------------|-------------|
| H | -3.10775562 | 2.51360214  | -6.11512015 |
| H | -4.35490094 | 2.53455339  | -8.25076039 |
| H | -4.47201491 | 0.48055797  | -9.65015435 |
| H | -3.32377370 | -1.59205314 | -8.89092170 |
| H | -2.07745468 | -1.60927021 | -6.75382554 |
| C | -1.76719285 | 2.86418323  | -2.33026347 |
| C | -1.07240735 | 4.15133697  | -1.98007746 |
| H | -0.00704541 | 3.95492147  | -1.80335388 |
| H | -1.12223534 | 4.84638650  | -2.83179952 |
| C | -1.66170677 | 4.84915566  | -0.73982840 |
| H | -2.72740850 | 5.06698809  | -0.87973723 |
| H | -1.56815121 | 4.20728511  | 0.14308614  |
| H | -1.14980868 | 5.79788759  | -0.53343185 |
| H | -2.75614385 | 2.93672195  | -2.77398186 |
| C | 3.95626578  | 1.37615937  | 3.21076515  |
| H | 4.44095312  | 1.38235204  | 2.22769539  |
| H | 3.20570157  | 2.17612391  | 3.21168299  |
| C | 4.97777342  | 1.60797585  | 4.30208592  |
| C | 6.20586604  | 0.92934073  | 4.28131395  |
| C | 7.14272294  | 1.11255492  | 5.29780417  |
| C | 6.86845499  | 1.98202180  | 6.35624866  |
| C | 5.65361334  | 2.66711927  | 6.38733825  |
| C | 4.71749221  | 2.47966949  | 5.36798251  |
| H | 3.77753463  | 3.02712034  | 5.39326185  |
| H | 5.43359743  | 3.35157869  | 7.20240408  |
| H | 7.59909038  | 2.12757253  | 7.14727038  |
| H | 8.09003014  | 0.58094795  | 5.26104193  |
| H | 6.43217865  | 0.25942302  | 3.45413015  |

**Table 57.** Geometric coordinates and thermally corrected MP2 energies for **6** spirocyclic dimer with one THF isomer 1

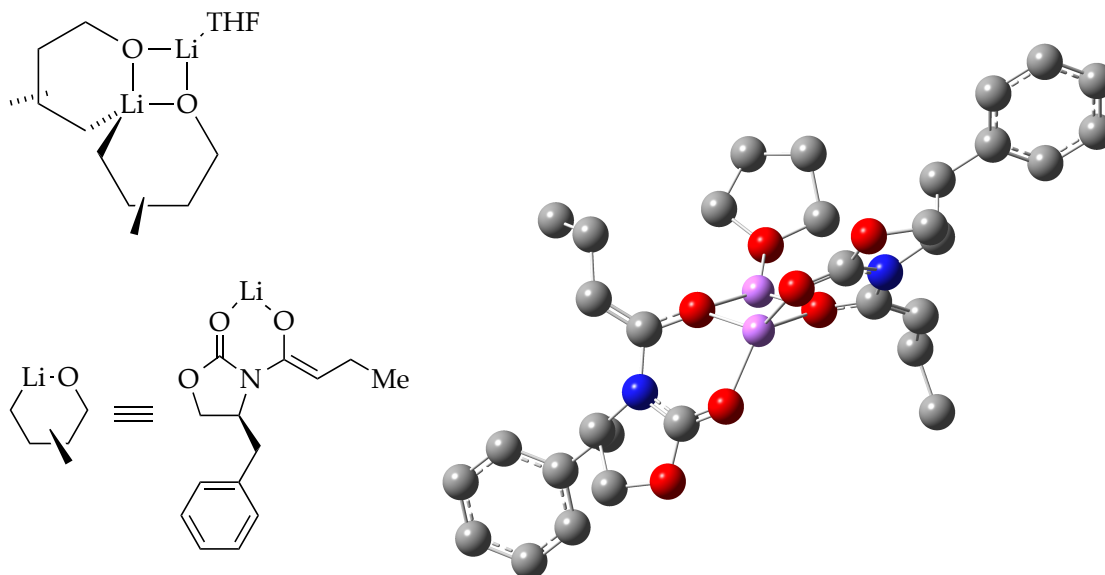

G = -1894.241229 Hartree

$G_{\text{MP2}} = -1184881.842$  kcal/mol

$\Delta G_{\text{MP2}} = 7.714645714$  kcal/mol Li vs. 6  $D_{2d}$  tetramer

| Atom | X          | Y           | Z           | Atom | X           | Y           | Z           |
|------|------------|-------------|-------------|------|-------------|-------------|-------------|
| Li   | 0.00000000 | 0.00000000  | 0.00000000  | O    | -0.33060076 | 1.38566865  | -1.34159709 |
| O    | 0.00000000 | 0.00000000  | 1.91814910  | C    | -1.45870396 | 1.41551329  | -1.99650605 |
| C    | 1.02412744 | 0.00000000  | 2.58807300  | N    | -1.86971349 | 0.13430569  | -2.56683868 |
| O    | 0.95206720 | 0.07313102  | 3.94667232  | C    | -2.39874623 | -0.02494500 | -3.92446453 |
| C    | 2.24998089 | -0.20112971 | 4.49894138  | C    | -2.77820598 | -1.51681252 | -3.89539117 |
| H    | 2.27478908 | -1.24726073 | 4.82384497  | H    | -3.83600883 | -1.66657129 | -3.65258211 |
| H    | 2.40501532 | 0.44845538  | 5.36201952  | H    | -2.54249844 | -2.04421662 | -4.82133847 |
| C    | 3.23061231 | 0.07007247  | 3.34631165  | O    | -1.98517298 | -2.08019544 | -2.83462753 |
| H    | 4.00720145 | -0.69843333 | 3.32431812  | C    | -1.57627876 | -1.07590424 | -2.01089478 |
| N    | 2.33312150 | -0.07135945 | 2.19387402  | O    | -1.03757127 | -1.32405639 | -0.93881342 |
| C    | 2.78703298 | -0.10545375 | 0.80681731  | H    | -3.29102257 | 0.59049513  | -4.06514645 |
| C    | 4.05111352 | -0.53684413 | 0.55623645  | C    | -1.34941095 | 0.34926392  | -4.99739261 |
| H    | 4.66211133 | -0.91152623 | 1.37188509  | H    | -1.00562402 | 1.36450262  | -4.76749687 |
| C    | 4.61691847 | -0.67492167 | -0.83148975 | H    | -0.48769883 | -0.32107080 | -4.89091182 |
| H    | 5.59826781 | -0.17792425 | -0.89783199 | C    | -1.89988262 | 0.28652560  | -6.40479567 |
| H    | 3.95954409 | -0.16361219 | -1.54420611 | C    | -1.57548600 | -0.77008509 | -7.26624050 |
| C    | 4.78528155 | -2.14050187 | -1.27401345 | C    | -2.11275170 | -0.83827764 | -8.55358512 |
| H    | 5.43653308 | -2.68976060 | -0.58262333 | C    | -2.98670379 | 0.15289402  | -9.00057637 |
| H    | 3.81601513 | -2.65075053 | -1.29201954 | C    | -3.31540917 | 1.21457566  | -8.15414184 |
| H    | 5.22939111 | -2.20788294 | -2.27562088 | C    | -2.77551677 | 1.27962519  | -6.87005288 |
| O    | 1.91339449 | 0.30771218  | -0.06394029 | H    | -3.02721580 | 2.11634116  | -6.22128770 |
| Li   | 1.47230927 | 1.58236160  | -1.28723232 | H    | -3.98905079 | 1.99583131  | -8.49665198 |

|   |             |             |              |
|---|-------------|-------------|--------------|
| H | -3.40505644 | 0.10258963  | -10.00220844 |
| H | -1.84451753 | -1.66459848 | -9.20672090  |
| H | -0.88579127 | -1.54126625 | -6.92945926  |
| C | -2.27005261 | 2.47929430  | -2.20905427  |
| C | -1.96390325 | 3.87146465  | -1.73364868  |
| H | -2.75910895 | 4.21965200  | -1.05597837  |
| H | -1.04641060 | 3.84780768  | -1.13403768  |
| C | -1.81993073 | 4.89686484  | -2.87300410  |
| H | -0.99364937 | 4.62814172  | -3.54276325  |
| H | -2.73165201 | 4.94095701  | -3.48197556  |
| H | -1.63319497 | 5.90714546  | -2.48575244  |
| H | -3.21410581 | 2.32554529  | -2.72555051  |
| O | 2.67719523  | 2.97384100  | -1.85993384  |
| C | 2.22777033  | 4.27736741  | -2.31965997  |
| C | 3.26991300  | 5.29248513  | -1.81925491  |
| C | 3.97946397  | 4.53446493  | -0.68376945  |
| C | 3.96487874  | 3.10340555  | -1.21016841  |
| H | 4.02499015  | 2.32694013  | -0.44420796  |
| H | 4.75972984  | 2.93774224  | -1.94995057  |
| H | 3.40393211  | 4.60018539  | 0.24690287   |
| H | 4.99107184  | 4.90241918  | -0.48887175  |
| H | 2.80748221  | 6.22676036  | -1.48882388  |
| H | 3.98269692  | 5.53475237  | -2.61535657  |
| H | 2.14427439  | 4.25584430  | -3.41089255  |
| H | 1.23368456  | 4.44918464  | -1.89594088  |
| C | 3.89078435  | 1.46875170  | 3.39420822   |
| H | 4.37090246  | 1.62992403  | 2.42255995   |
| H | 3.09934356  | 2.22099199  | 3.49966702   |
| C | 4.90206222  | 1.60647422  | 4.51058704   |
| C | 6.15497263  | 0.98127991  | 4.41539176   |
| C | 7.08431814  | 1.07721649  | 5.45053101   |
| C | 6.77788512  | 1.80452595  | 6.60323550   |
| C | 5.53842256  | 2.43578323  | 6.70949618   |
| C | 4.60993324  | 2.33572904  | 5.67100648   |
| H | 3.64948830  | 2.83966140  | 5.75737571   |
| H | 5.29266346  | 3.00968656  | 7.59917586   |
| H | 7.50225594  | 1.88176369  | 7.40950922   |
| H | 8.05042605  | 0.58831936  | 5.35561140   |
| H | 6.40637410  | 0.42248487  | 3.51603741   |

**Table 58.** Geometric coordinates and thermally corrected MP2 energies for **6** spirocyclic dimer with two THF isomer 1

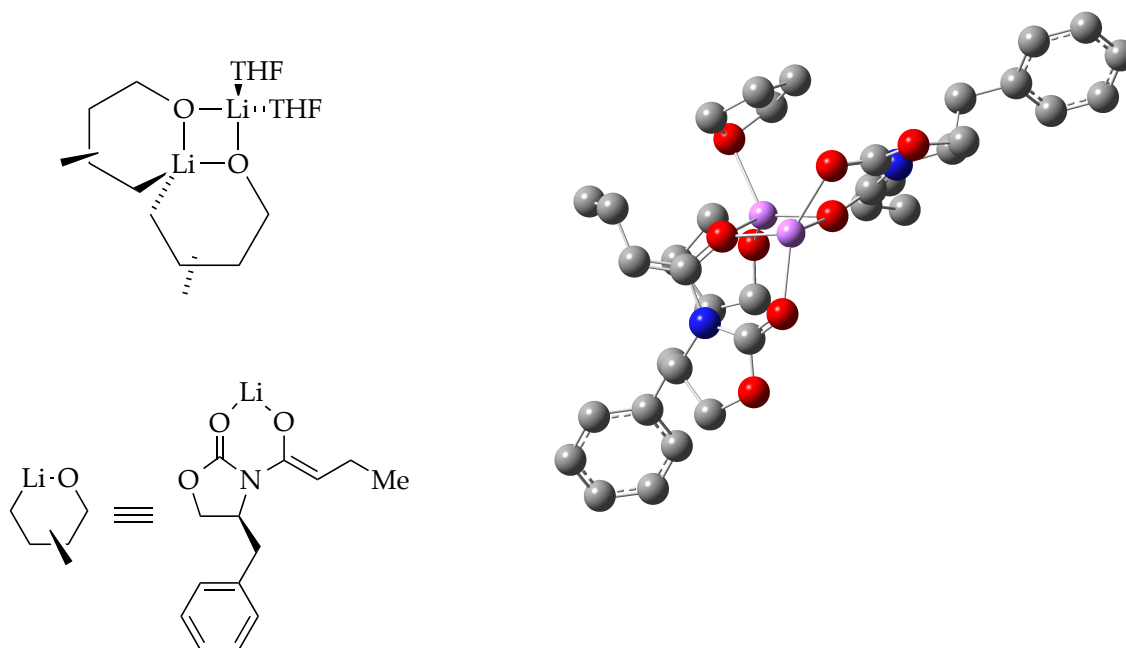

G = - 2126.593648 Hartree

G<sub>MP2</sub> = - 1330206.864 kcal/mol

ΔG<sub>MP2</sub> = 1.348809468 kcal/mol Li vs. 6 D<sub>2d</sub> tetramer

| Atom | X          | Y           | Z           | Atom | X           | Y           | Z           |
|------|------------|-------------|-------------|------|-------------|-------------|-------------|
| Li   | 0.00000000 | 0.00000000  | 0.00000000  | O    | -0.87912306 | 1.32263911  | -1.29040239 |
| O    | 0.00000000 | 0.00000000  | 2.18222390  | C    | -1.46196808 | 1.13446757  | -2.40743173 |
| C    | 1.09418993 | 0.00000000  | 2.71579528  | N    | -0.79671556 | 0.08354206  | -3.22391611 |
| O    | 1.29803016 | -0.80922379 | 3.82996287  | C    | -0.78764032 | 0.12763986  | -4.71932943 |
| C    | 2.68474703 | -0.69264622 | 4.28601243  | C    | -0.03794534 | -1.17673719 | -5.08773448 |
| H    | 3.14784815 | -1.67331317 | 4.09392508  | H    | -0.66876267 | -1.92029298 | -5.59965691 |
| H    | 2.61660762 | -0.50246284 | 5.36877245  | H    | 0.90350015  | -1.02443129 | -5.63885655 |
| C    | 3.30801403 | 0.46459328  | 3.46434807  | O    | 0.34962937  | -1.79761233 | -3.82080252 |
| H    | 4.25208139 | 0.14602593  | 2.95464767  | C    | -0.11679231 | -1.03767795 | -2.74916975 |
| N    | 2.25236353 | 0.72902787  | 2.43604758  | O    | 0.09919872  | -1.42590519 | -1.61749617 |
| C    | 2.49757212 | 1.49858009  | 1.19060420  | H    | -1.84016157 | 0.10617146  | -5.10127021 |
| C    | 3.49493725 | 2.41619041  | 1.16690978  | C    | -0.07870328 | 1.40121460  | -5.21043261 |
| H    | 4.11287076 | 2.62653090  | 2.02858856  | H    | -0.64225586 | 2.29042263  | -4.83830438 |
| C    | 3.81636128 | 3.19256699  | -0.07023916 | H    | 0.92293870  | 1.48917945  | -4.72628520 |
| H    | 3.13130290 | 4.07404076  | -0.14259862 | C    | 0.02580691  | 1.44519797  | -6.70658861 |
| H    | 3.62221398 | 2.57934752  | -0.97604178 | C    | 1.25779526  | 1.21853167  | -7.33841595 |
| C    | 5.26823276 | 3.67596351  | -0.09291341 | C    | 1.34852695  | 1.26441879  | -8.73270204 |
| H    | 5.48395203 | 4.34172005  | 0.74907301  | C    | 0.21434284  | 1.53560723  | -9.50365423 |
| H    | 5.96330634 | 2.83096990  | -0.02711652 | C    | -1.01477637 | 1.76347650  | -8.87544090 |
| H    | 5.49065611 | 4.22084516  | -1.01515132 | C    | -1.11142368 | 1.72012179  | -7.48271673 |
| O    | 1.67575157 | 1.19090202  | 0.27081781  | H    | -2.06969423 | 1.90362535  | -6.99904964 |
| Li   | 0.73064292 | 2.53802900  | -0.92206352 | H    | -1.89987443 | 1.97625938  | -9.47393995 |

|   |             |            |              |
|---|-------------|------------|--------------|
| H | 0.28685995  | 1.56965873 | -10.58890572 |
| H | 2.30689458  | 1.08686541 | -9.21908677  |
| H | 2.14639999  | 1.00561954 | -6.74780853  |
| C | -2.54582949 | 1.75947670 | -2.92191095  |
| C | -3.24368523 | 2.84415189 | -2.16654186  |
| H | -4.32847118 | 2.61865153 | -2.11703622  |
| H | -2.88691374 | 2.86336099 | -1.10798131  |
| C | -3.02702576 | 4.22024794 | -2.80363917  |
| H | -1.96373434 | 4.48153304 | -2.81788765  |
| H | -3.38394391 | 4.23707975 | -3.83855315  |
| H | -3.55904574 | 5.00193769 | -2.25349832  |
| H | -2.97716852 | 1.49885176 | -3.87452190  |
| O | -0.14096473 | 4.39573245 | 0.00938084   |
| C | -1.33610908 | 3.88350248 | 0.67416039   |
| C | -0.86704384 | 3.33509522 | 2.02321044   |
| C | 0.45180737  | 4.07518275 | 2.31905926   |
| C | 0.79262989  | 4.84394187 | 1.03680175   |
| H | 1.79969166  | 4.62030417 | 0.62354153   |
| H | 0.65343876  | 5.93147053 | 1.13659295   |
| H | 1.25516223  | 3.36216232 | 2.58422906   |
| H | 0.34540469  | 4.75636363 | 3.17932398   |
| H | -0.70406801 | 2.23794889 | 1.98655022   |
| H | -1.61594170 | 3.49993510 | 2.81493441   |
| H | -2.03379658 | 4.73042335 | 0.77390106   |
| H | -1.75519139 | 3.12846555 | -0.03196289  |
| C | 3.57011299  | 1.71032334 | 4.33133837   |
| H | 3.85811212  | 2.56098287 | 3.66198428   |
| H | 2.63250098  | 2.04500359 | 4.81902201   |
| C | 4.65676536  | 1.45736816 | 5.33654847   |
| C | 5.99428686  | 1.37030113 | 4.91813108   |
| C | 7.00565255  | 1.13257476 | 5.85161789   |
| C | 6.69225773  | 0.98200151 | 7.20676110   |
| C | 5.36172680  | 1.07266551 | 7.62600509   |
| C | 4.34490505  | 1.30900276 | 6.69617263   |
| H | 3.31283254  | 1.38402099 | 7.03321935   |
| H | 5.11491263  | 0.95972486 | 8.68079515   |
| H | 7.48198053  | 0.79716790 | 7.93196059   |
| H | 8.04189434  | 1.06591858 | 5.52281138   |
| H | 6.24541160  | 1.49330143 | 3.86565812   |
| C | 2.42600874  | 3.30796747 | -3.63949907  |
| O | 1.85682484  | 3.81699627 | -2.40274039  |
| C | 1.21756985  | 5.10474173 | -2.63674183  |
| C | 1.03860678  | 5.24995305 | -4.14933598  |
| C | 2.07189208  | 4.28922633 | -4.76248291  |
| H | 1.66612193  | 3.77240845 | -5.65056869  |
| H | 2.96536834  | 4.83956314 | -5.10763700  |
| H | 0.01325828  | 4.97409128 | -4.45822410  |
| H | 1.19533539  | 6.28832340 | -4.48577887  |
| H | 0.27301406  | 5.06820211 | -2.06239850  |
| H | 1.89734127  | 5.85916993 | -2.20658978  |
| H | 3.50785313  | 3.22085854 | -3.44779242  |
| H | 1.97277515  | 2.30524487 | -3.78215076  |

**Table 59.** Geometric coordinates and thermally corrected MP2 energies for **6** spirocyclic dimer with no THF isomer 2

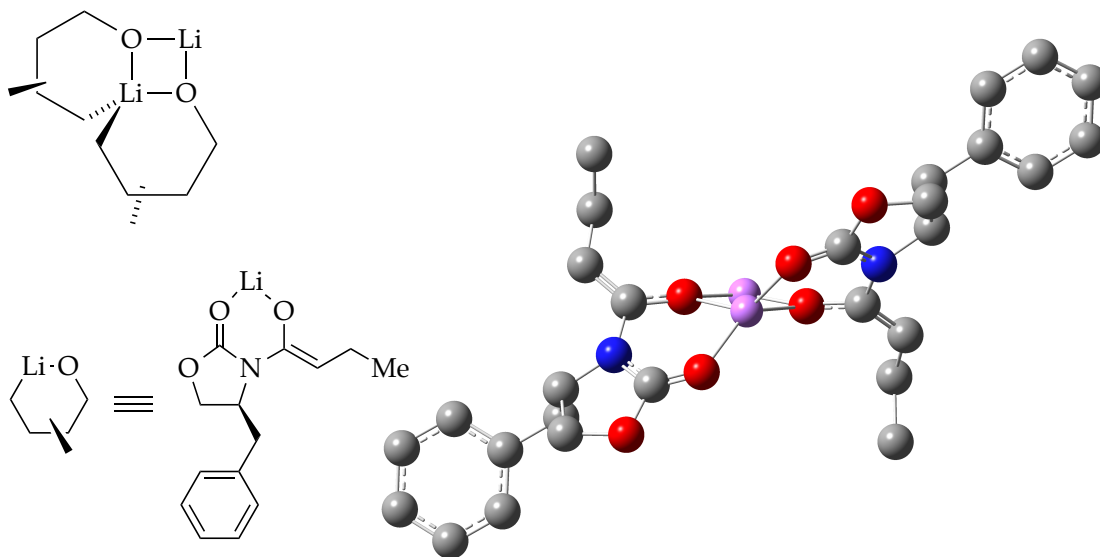

G = -1661.875945 Hartree

$G_{\text{MP2}} = -1039554.194$  kcal/mol

$\Delta G_{\text{MP2}} = 15.3933466$  kcal/mol vs. **6**  $D_{2d}$  tetramer

| Atom | X          | Y           | Z           | Atom | X           | Y           | Z           |
|------|------------|-------------|-------------|------|-------------|-------------|-------------|
| Li   | 0.00000000 | 0.00000000  | 0.00000000  | Li   | 1.61465982  | 1.34721341  | -1.29298275 |
| O    | 0.00000000 | 0.00000000  | 1.91517720  | O    | -0.13420287 | 1.37776171  | -1.43613406 |
| C    | 1.01728616 | 0.00000000  | 2.59802520  | C    | -1.26337057 | 1.64138540  | -2.04208625 |
| O    | 0.95274838 | 0.23810925  | 3.93565776  | N    | -2.01545801 | 0.46848068  | -2.46246574 |
| C    | 2.23505051 | -0.05258111 | 4.52175038  | C    | -2.74409085 | 0.38090436  | -3.73399021 |
| H    | 2.19335397 | -1.05410783 | 4.96381657  | C    | -3.45575454 | -0.96904188 | -3.54447125 |
| H    | 2.43195351 | 0.68113399  | 5.30490378  | H    | -4.46803059 | -0.84748522 | -3.14355356 |
| C    | 3.22611718 | 0.01946957  | 3.34816436  | H    | -3.49585278 | -1.57252925 | -4.45256575 |
| H    | 3.96359003 | -0.78327643 | 3.42453433  | O    | -2.66177591 | -1.66680120 | -2.56720647 |
| N    | 2.31248110 | -0.22165786 | 2.22455173  | C    | -1.92571669 | -0.75947821 | -1.87071429 |
| C    | 2.75357450 | -0.39793141 | 0.84891806  | O    | -1.31147658 | -1.09527210 | -0.86517377 |
| C    | 3.89651884 | -1.08727865 | 0.62579009  | H    | -3.47649132 | 1.18782738  | -3.81503220 |
| H    | 4.39496595 | -1.56920358 | 1.46212641  | C    | -1.78597682 | 0.43312292  | -4.94730144 |
| C    | 4.47543890 | -1.31139793 | -0.74416143 | H    | -1.17854629 | 1.33899013  | -4.83856167 |
| H    | 5.56263627 | -1.14254672 | -0.72234239 | H    | -1.10666986 | -0.42630934 | -4.89065732 |
| H    | 4.06165057 | -0.57121068 | -1.44110657 | C    | -2.51487106 | 0.44481212  | -6.27273529 |
| C    | 4.20720820 | -2.72241043 | -1.30053154 | C    | -2.58414883 | -0.70258345 | -7.07424313 |
| H    | 4.61110592 | -3.49251310 | -0.63228956 | C    | -3.28317362 | -0.69280004 | -8.28329898 |
| H    | 3.13029013 | -2.89927278 | -1.39674731 | C    | -3.92676502 | 0.46905195  | -8.70997488 |
| H    | 4.66941556 | -2.85822929 | -2.28676504 | C    | -3.86300997 | 1.62127655  | -7.92269234 |
| O    | 1.98688873 | 0.16841119  | -0.04724638 | C    | -3.16281593 | 1.60761846  | -6.71684699 |

|   |             |             |             |   |            |            |            |
|---|-------------|-------------|-------------|---|------------|------------|------------|
| H | -3.10787470 | 2.51277389  | -6.11525104 | C | 3.95615843 | 1.37632569 | 3.21101473 |
| H | -4.35442559 | 2.53336883  | -8.25124215 | H | 4.44084282 | 1.38273815 | 2.22794537 |
| H | -4.46975459 | 0.47960984  | -9.65113361 | H | 3.20553700 | 2.17623648 | 3.21208703 |
| H | -3.32033144 | -1.59239687 | -8.89204337 | C | 4.97765215 | 1.60801631 | 4.30237664 |
| H | -2.07461022 | -1.60925590 | -6.75459349 | C | 6.20576372 | 0.92941659 | 4.28152168 |
| C | -1.76862774 | 2.86341041  | -2.32958515 | C | 7.14261305 | 1.11252902 | 5.29803625 |
| C | -1.07482974 | 4.15096945  | -1.97896800 | C | 6.86831781 | 1.98185402 | 6.35658981 |
| H | -0.00961063 | 3.95504058  | -1.80092459 | C | 5.65345533 | 2.66691019 | 6.38776658 |
| H | -1.12397244 | 4.84579453  | -2.83092305 | C | 4.71734231 | 2.47956344 | 5.36838578 |
| C | -1.66594737 | 4.84883684  | -0.73961465 | H | 3.77736921 | 3.02698442 | 5.39373052 |
| H | -2.73159504 | 5.06609747  | -0.88084092 | H | 5.43341698 | 3.35125776 | 7.20291974 |
| H | -1.57311179 | 4.20727805  | 0.14360243  | H | 7.59894811 | 2.12732349 | 7.14763132 |
| H | -1.15477533 | 5.79788728  | -0.53289282 | H | 8.08993522 | 0.58095382 | 5.26120954 |
| H | -2.75764807 | 2.93537489  | -2.77325818 | H | 6.43209535 | 0.25960820 | 3.45425363 |

**Table 60.** Geometric coordinates and thermally corrected MP2 energies for **6** spirocyclic dimer with one THF isomer 2

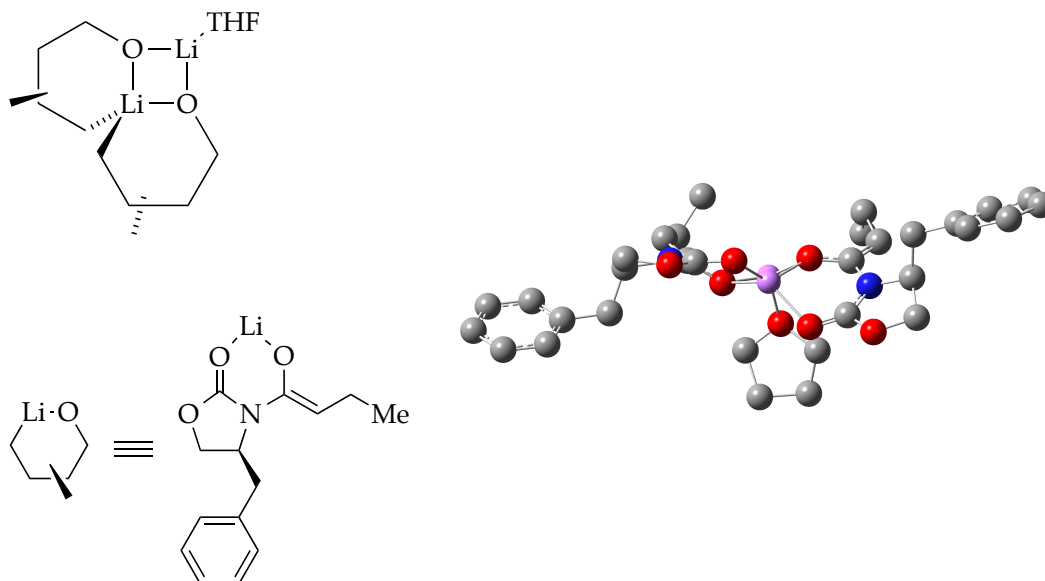

$G = -1894.239434$  Hartree

$G_{\text{MP2}} = -1184882.872$  kcal/mol

$\Delta G_{\text{MP2}} = 7.199447576$  kcal/mol Li vs. **6**  $D_{2d}$  tetramer

| Atom | X          | Y           | Z           | Atom | X           | Y           | Z           |
|------|------------|-------------|-------------|------|-------------|-------------|-------------|
| Li   | 0.00000000 | 0.00000000  | 0.00000000  | O    | -0.56521106 | -1.19680514 | -1.41982614 |
| O    | 0.00000000 | 0.00000000  | 1.91054780  | C    | -1.62075689 | -1.13464034 | -2.18064299 |
| C    | 1.07089690 | 0.00000000  | 2.50862880  | N    | -2.47982741 | 0.02082907  | -1.94771922 |
| O    | 1.17252059 | 0.53670784  | 3.75385891  | C    | -3.93264499 | 0.01897824  | -2.16358414 |
| C    | 2.46730262 | 0.21553212  | 4.29639021  | C    | -4.23661982 | 1.51632931  | -1.99290770 |
| H    | 2.35062638 | -0.62240487 | 4.99232681  | H    | -4.25431148 | 2.04659640  | -2.95173148 |
| H    | 2.83973285 | 1.08577525  | 4.83943979  | H    | -5.16478727 | 1.71333065  | -1.45415968 |
| C    | 3.32756678 | -0.16079095 | 3.07581749  | O    | -3.13956639 | 2.02586358  | -1.21259314 |
| H    | 3.93609033 | -1.04096527 | 3.29776796  | C    | -2.09251177 | 1.16148764  | -1.30173086 |
| N    | 2.27641251 | -0.49209864 | 2.10836570  | O    | -0.99768609 | 1.46254488  | -0.83593481 |
| C    | 2.53700429 | -1.05257793 | 0.78731582  | H    | -4.16911361 | -0.29881187 | -3.18163396 |
| C    | 3.45411556 | -2.04991688 | 0.71217088  | C    | -4.65886999 | -0.90004687 | -1.15351956 |
| H    | 3.86410608 | -2.45805167 | 1.63139681  | H    | -4.18599408 | -1.88607711 | -1.21884020 |
| C    | 3.87666682 | -2.69422092 | -0.57957637 | H    | -4.47657688 | -0.51783450 | -0.14168534 |
| H    | 4.95675667 | -2.90162286 | -0.55681793 | C    | -6.14429596 | -1.00350227 | -1.41970669 |
| H    | 3.72828124 | -1.98918624 | -1.40964275 | C    | -7.07429964 | -0.32060557 | -0.62436896 |
| C    | 3.13721698 | -4.00961678 | -0.89798784 | C    | -8.44280557 | -0.39713491 | -0.89268064 |
| H    | 3.29365583 | -4.74778927 | -0.10275064 | C    | -8.90388411 | -1.16004671 | -1.96573320 |
| H    | 2.05480839 | -3.84627722 | -0.97462511 | C    | -7.98846200 | -1.84942787 | -2.76467552 |
| H    | 3.48661682 | -4.45042656 | -1.84098919 | C    | -6.62306971 | -1.77145460 | -2.49234782 |
| O    | 1.87815713 | -0.49594777 | -0.19192525 | H    | -5.91781201 | -2.32248462 | -3.11139994 |
| Li   | 1.23251482 | -1.14726212 | -1.79618004 | H    | -8.33914929 | -2.45407919 | -3.59709282 |



|   |             |             |             |   |            |             |             |
|---|-------------|-------------|-------------|---|------------|-------------|-------------|
| H | -9.96830688 | -1.22308264 | -2.17517850 | H | 1.32726187 | 2.47773800  | -5.12236282 |
| H | -9.14699144 | 0.13614080  | -0.25939245 | H | 3.95562664 | 2.00233573  | -4.55616242 |
| H | -6.72389492 | 0.26554341  | 0.22264738  | H | 2.86398363 | 2.39142606  | -3.21348283 |
| C | -1.99981862 | -2.03404680 | -3.12557615 | H | 3.60784429 | 0.25086449  | -2.41948229 |
| C | -1.25236189 | -3.31538516 | -3.38128766 | H | 3.85187652 | -0.37091688 | -4.07588814 |
| H | -0.63595698 | -3.55191030 | -2.50507040 | C | 4.24441303 | 0.97178749  | 2.55866653  |
| H | -1.96981527 | -4.14346395 | -3.48338839 | H | 4.62053413 | 0.65517341  | 1.57897854  |
| C | -0.35911990 | -3.29507051 | -4.63733191 | H | 3.63562120 | 1.87011751  | 2.39975072  |
| H | -0.94342356 | -3.05385139 | -5.53418046 | C | 5.39483528 | 1.26869356  | 3.49490993  |
| H | 0.43151252  | -2.54048743 | -4.54477203 | C | 6.48742666 | 0.39209795  | 3.57980908  |
| H | 0.11974939  | -4.26902310 | -4.80303963 | C | 7.53811883 | 0.64016055  | 4.46249533  |
| H | -2.87391845 | -1.83587576 | -3.73826947 | C | 7.51660102 | 1.77435429  | 5.27786823  |
| O | 1.88550886  | -0.31101649 | -3.42436432 | C | 6.43950463 | 2.65744535  | 5.20024822  |
| C | 3.22031645  | 0.26282143  | -3.44162158 | C | 5.38863884 | 2.40442566  | 4.31585275  |
| C | 3.06267985  | 1.67301415  | -4.01669636 | H | 4.55795039 | 3.10425194  | 4.25271025  |
| C | 1.82497561  | 1.52572628  | -4.91564490 | H | 6.41670083 | 3.54678484  | 5.82465308  |
| C | 0.95179715  | 0.58270251  | -4.09242299 | H | 8.33626764 | 1.96992763  | 5.96396783  |
| H | 0.26813765  | -0.03439954 | -4.67948802 | H | 8.37727677 | -0.04904017 | 4.51015228  |
| H | 0.37996032  | 1.12306170  | -3.32868027 | H | 6.51747884 | -0.48729890 | 2.93947816  |
| H | 2.09486622  | 1.06373518  | -5.87273262 |   |            |             |             |

**Table 61.** Geometric coordinates and thermally corrected MP2 energies for **6** spirocyclic dimer with two THF isomer 2

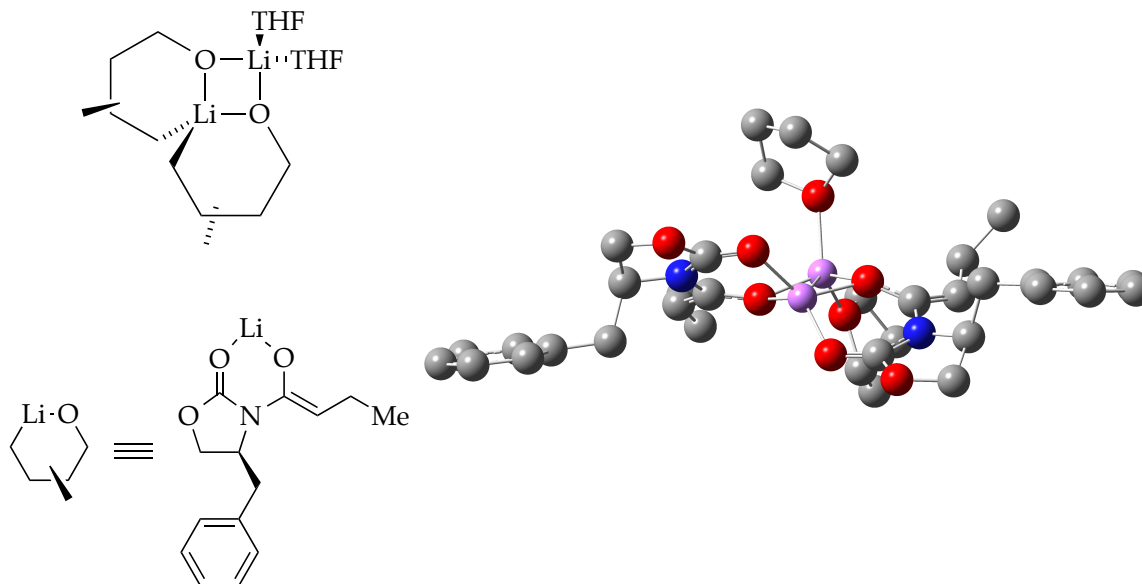

G = - 2126.595319 Hartree

G<sub>MP2</sub> = - 1330207.012 kcal/mol

ΔG<sub>MP2</sub> = 1.274348253 kcal/mol Li vs. 6 D<sub>2d</sub> tetramer

| Atom | X          | Y           | Z           | Atom | X           | Y           | Z           |
|------|------------|-------------|-------------|------|-------------|-------------|-------------|
| Li   | 0.00000000 | 0.00000000  | 0.00000000  | O    | -0.88616886 | -1.14971633 | -1.22897677 |
| O    | 0.00000000 | 0.00000000  | 1.91162270  | C    | -1.99809927 | -0.95943783 | -1.86873565 |
| C    | 1.07650503 | 0.00000000  | 2.49616371  | N    | -2.51823779 | 0.40964975  | -1.81843405 |
| O    | 1.17414804 | 0.53154391  | 3.74655589  | C    | -3.91575027 | 0.76605672  | -2.09954620 |
| C    | 2.47221623 | 0.22620475  | 4.28342433  | C    | -3.79515749 | 2.29279965  | -2.20504143 |
| H    | 2.37749019 | -0.63801045 | 4.95081554  | H    | -3.64440625 | 2.62536254  | -3.23865879 |
| H    | 2.82311856 | 1.08718070  | 4.85468655  | H    | -4.64297575 | 2.82744744  | -1.77378392 |
| C    | 3.33607467 | -0.08603226 | 3.05241961  | O    | -2.61736312 | 2.61368468  | -1.44568655 |
| H    | 3.99743436 | -0.92875122 | 3.26395474  | C    | -1.84202513 | 1.49765101  | -1.33836235 |
| N    | 2.29437080 | -0.47063487 | 2.08946597  | O    | -0.71640516 | 1.58069585  | -0.85856681 |
| C    | 2.58239826 | -1.06114282 | 0.78089944  | H    | -4.23103416 | 0.34703039  | -3.05761746 |
| C    | 3.71263647 | -1.81505561 | 0.68403554  | C    | -4.86730025 | 0.28354451  | -0.97835904 |
| H    | 4.30436450 | -2.00487104 | 1.57418438  | H    | -4.68362323 | -0.78674802 | -0.83670963 |
| C    | 4.25048548 | -2.37752270 | -0.60272213 | H    | -4.58610083 | 0.78761512  | -0.04560095 |
| H    | 3.54937031 | -2.17181157 | -1.41796302 | C    | -6.32395267 | 0.53714793  | -1.29736409 |
| H    | 4.33158532 | -3.47576939 | -0.53892027 | C    | -7.03210333 | 1.58012449  | -0.68508830 |
| C    | 5.63696188 | -1.82024741 | -0.97540419 | C    | -8.36837949 | 1.82759928  | -1.00714585 |
| H    | 5.59247958 | -0.73515229 | -1.12528422 | C    | -9.01972776 | 1.03312156  | -1.95085503 |
| H    | 6.36759639 | -2.01291533 | -0.17932350 | C    | -8.32795230 | -0.01312660 | -2.56595082 |
| H    | 6.02202302 | -2.27756395 | -1.89630127 | C    | -6.99428832 | -0.25745487 | -2.24036615 |
| O    | 1.73177157 | -0.78184606 | -0.16026783 | H    | -6.46700898 | -1.08280326 | -2.71477681 |
| Li   | 0.87352612 | -1.77883512 | -1.57088312 | H    | -8.82975154 | -0.64331630 | -3.29573537 |

H -10.05997796 1.22276020 -2.20151224  
H -8.89997716 2.63877179 -0.51642687  
H -6.53530981 2.19619987 0.06147687  
C -2.72122154 -1.88229445 -2.56131389  
C -2.35890141 -3.34112811 -2.63741239  
H -1.37457453 -3.49840753 -2.18450789  
H -3.06868819 -3.94243211 -2.04323381  
C -2.35803371 -3.89535865 -4.07281077  
H -3.33282206 -3.74981393 -4.55612121  
H -1.60809824 -3.38901360 -4.69230570  
H -2.14174858 -4.97154566 -4.08732346  
H -3.63118345 -1.58613033 -3.07304500  
O 1.07615739 -3.74412215 -1.44166706  
C 0.87534208 -4.33726439 -0.13474960  
C 1.05877267 -5.84025868 -0.34526462  
C 2.11508294 -5.87846412 -1.46131618  
C 1.70970021 -4.68548925 -2.33304927  
H 0.98426479 -4.97398022 -3.10454477  
H 2.55738013 -4.18896852 -2.81415412  
H 2.12398446 -6.81891026 -2.02059136  
H 3.11557522 -5.72069365 -1.04235218  
H 0.12286538 -6.29800072 -0.68685271  
H 1.37615478 -6.35324112 0.56757235  
H 1.62355527 -3.92293224 0.55170964  
H -0.12316252 -4.05266417 0.20723894  
C 4.17294101 1.11038022 2.54097066  
H 4.53434793 0.84395798 1.54179727  
H 3.50963353 1.97679393 2.42922350  
C 5.33372317 1.44479330 3.45121267  
C 6.47859345 0.63323004 3.46699094  
C 7.54245106 0.91113605 4.32447792  
C 7.48148060 2.01054684 5.18428862  
C 6.35206807 2.82937085 5.17553348  
C 5.28841429 2.54692804 4.31561173  
H 4.41663374 3.19784436 4.30573171  
H 6.29830194 3.69202979 5.83456202  
H 8.31101407 2.22973949 5.85117564  
H 8.42243018 0.27307038 4.31776002  
H 6.53814345 -0.21736084 2.79081755  
C 2.45363641 0.02638542 -3.26917087  
O 1.60064499 -1.14003945 -3.33972033  
C 0.68815211 -1.00184154 -4.46059109  
C 0.90398216 0.41299667 -5.03097570  
C 1.62458271 1.14776552 -3.88668535  
H 2.23941239 1.98307548 -4.23633258  
H 0.90950382 1.52806490 -3.14951668  
H 1.54233631 0.37610533 -5.92134909  
H -0.03929156 0.88748283 -5.31723639  
H 0.90982171 -1.78617453 -5.19387716  
H -0.32608546 -1.15091552 -4.07862324  
H 2.70055079 0.17393075 -2.21662740  
H 3.37226928 -0.16225066 -3.84404853

**Table 62.** Geometric coordinates and thermally corrected MP2 energies for **6** trans disolvated spirocyclic dimer with two THF

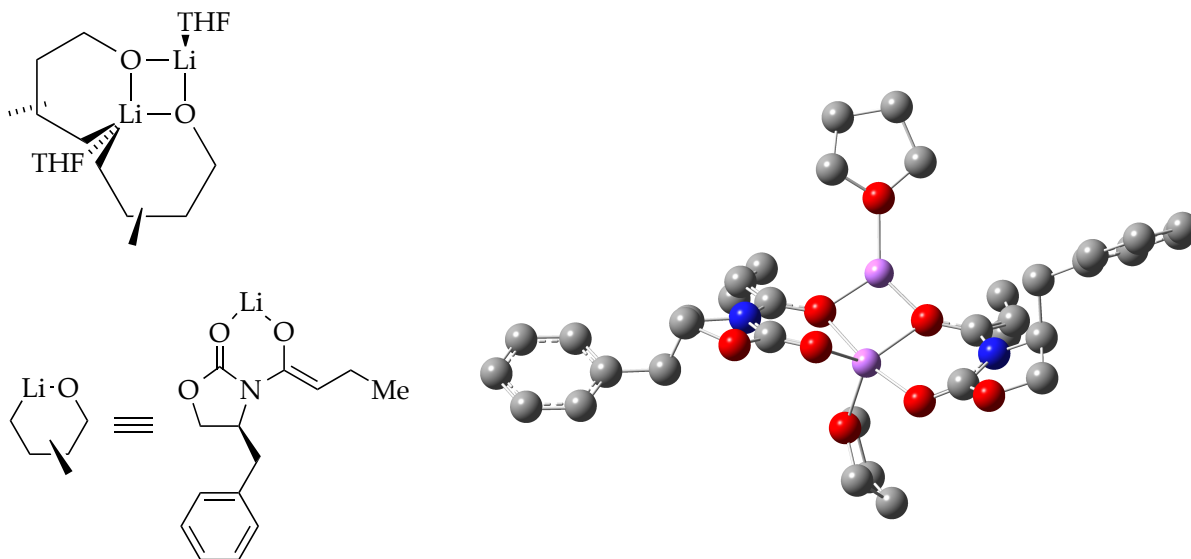

$G = -2126.589252$  Hartree

$G_{\text{MP2}} = -1330201.148$  kcal/mol

$\Delta G_{\text{MP2}} = 4.206354087$  kcal/mol Li vs. **6**  $D_{2d}$  tetramer

| Atom | X          | Y           | Z           | Atom | X           | Y           | Z           |
|------|------------|-------------|-------------|------|-------------|-------------|-------------|
| Li   | 0.0000000  | 0.0000000   | 0.0000000   | H    | 6.18273783  | 1.76295453  | -2.94736720 |
| Li   | 0.0000000  | 0.0000000   | 2.63669680  | H    | 8.51859193  | 2.46671796  | -3.36016691 |
| O    | 1.43090494 | 0.0000000   | 1.53605375  | H    | 10.19982909 | 2.35060230  | -1.52926426 |
| C    | 2.64817438 | 0.44005453  | 1.54807440  | H    | 9.51811921  | 1.51743344  | 0.71426012  |
| N    | 2.94365946 | 1.45339536  | 0.54659440  | H    | 7.18335642  | 0.81296718  | 1.12142579  |
| C    | 2.03098225 | 1.98636927  | -0.33092135 | C    | 3.64518206  | 0.06028397  | 2.40000878  |
| O    | 0.85003855 | 1.73074005  | -0.49944863 | H    | 4.62791281  | 0.51505387  | 2.33246023  |
| O    | 2.64215616 | 2.93824240  | -1.09988435 | C    | 3.48616822  | -1.04532800 | 3.40935719  |
| C    | 3.95849311 | 3.18331657  | -0.58087033 | H    | 3.62121051  | -0.66642541 | 4.43739408  |
| H    | 3.92406399 | 4.07175172  | 0.06108394  | H    | 2.46197111  | -1.43319146 | 3.35855464  |
| H    | 4.63387768 | 3.36774451  | -1.41796475 | C    | 4.47488702  | -2.20645881 | 3.19946560  |
| C    | 4.29545362 | 1.91327008  | 0.21025024  | H    | 5.51349206  | -1.85372956 | 3.24068147  |
| H    | 4.84967460 | 2.16384955  | 1.11802727  | H    | 4.35722581  | -2.98190553 | 3.96759174  |
| C    | 5.07447174 | 0.85543132  | -0.61061495 | H    | 4.32459151  | -2.67087452 | 2.21777515  |
| H    | 5.03298535 | -0.08479958 | -0.05099209 | O    | -1.31642631 | -0.43099399 | 1.48242747  |
| H    | 4.54010459 | 0.69415420  | -1.55482647 | C    | -2.55524297 | -0.81078152 | 1.38486376  |
| C    | 6.50853290 | 1.25401892  | -0.87924427 | N    | -3.31705280 | -0.15937432 | 0.32539228  |
| C    | 7.47002323 | 1.18805141  | 0.14097330  | C    | -4.68167298 | 0.34582839  | 0.49233202  |
| C    | 8.78817095 | 1.58093463  | -0.08870677 | C    | -4.98847303 | 0.78062915  | -0.95210617 |
| C    | 9.17217273 | 2.04708829  | -1.34834918 | H    | -5.52209816 | 0.00187711  | -1.50901231 |
| C    | 8.22888524 | 2.11305964  | -2.37403346 | H    | -5.54828016 | 1.71557911  | -1.01532938 |
| C    | 6.90957867 | 1.71993422  | -2.13885374 | O    | -3.70081243 | 0.97638712  | -1.56090310 |

|   |             |             |             |   |             |             |             |
|---|-------------|-------------|-------------|---|-------------|-------------|-------------|
| C | -2.76050804 | 0.30554808  | -0.83201672 | O | 0.03408254  | 0.81405692  | 4.38352872  |
| O | -1.61768646 | 0.17838449  | -1.24277305 | C | -0.92290953 | 0.74472557  | 5.46902677  |
| H | -5.35728631 | -0.45699862 | 0.79881994  | C | -0.37334894 | 1.65320057  | 6.58225194  |
| C | -4.74739532 | 1.48900734  | 1.53274287  | C | 1.12079421  | 1.76744073  | 6.23209308  |
| H | -4.28758410 | 1.10835684  | 2.45225511  | C | 1.08275373  | 1.75724709  | 4.70777205  |
| H | -4.12787488 | 2.32090924  | 1.17658355  | H | 1.99778250  | 1.41158088  | 4.22058890  |
| C | -6.15931165 | 1.95773749  | 1.80509314  | H | 0.81464546  | 2.74570690  | 4.30765040  |
| C | -6.63584143 | 3.16950321  | 1.28707538  | H | 1.67605813  | 0.89768027  | 6.60173749  |
| C | -7.94968535 | 3.58307371  | 1.51831763  | H | 1.58755320  | 2.67057787  | 6.63630589  |
| C | -8.81143440 | 2.78702898  | 2.27319856  | H | -0.55227684 | 1.23782598  | 7.57811558  |
| C | -8.34927701 | 1.57781461  | 2.79843096  | H | -0.84771468 | 2.64010935  | 6.54084466  |
| C | -7.03617964 | 1.16959472  | 2.56650020  | H | -1.90244012 | 1.06534283  | 5.09968511  |
| H | -6.68074703 | 0.23135631  | 2.98810473  | H | -0.99300165 | -0.30244441 | 5.78162864  |
| H | -9.01128006 | 0.95430258  | 3.39392401  | O | 0.83834633  | -1.58755661 | -0.99738177 |
| H | -9.83376447 | 3.10716027  | 2.45554364  | C | 0.99166578  | -2.76393916 | -0.16727700 |
| H | -8.29688516 | 4.52886508  | 1.11047418  | C | 0.78774095  | -3.96853931 | -1.09543528 |
| H | -5.96704077 | 3.80082386  | 0.70578689  | C | -0.11197965 | -3.38611124 | -2.19715814 |
| C | -3.21842968 | -1.70766395 | 2.16001577  | C | 0.44337935  | -1.96872056 | -2.33071186 |
| C | -2.59583483 | -2.43955399 | 3.31656723  | H | -0.28377977 | -1.23409912 | -2.68031456 |
| H | -1.65087764 | -1.95383882 | 3.59293562  | H | 1.32633991  | -1.94845264 | -2.98620909 |
| H | -3.24593679 | -2.37172619 | 4.20364218  | H | -1.15537037 | -3.35200633 | -1.86214628 |
| C | -2.32233870 | -3.92848574 | 3.03154208  | H | -0.06999783 | -3.94781153 | -3.13575879 |
| H | -1.90061357 | -4.43696631 | 3.90851525  | H | 0.34124739  | -4.82185137 | -0.57559097 |
| H | -3.24590528 | -4.45103246 | 2.75360260  | H | 1.74428499  | -4.29552252 | -1.52094795 |
| H | -1.61848207 | -4.03882307 | 2.19866799  | H | 1.97940521  | -2.73223740 | 0.30152020  |
| H | -4.23900329 | -1.97454377 | 1.89857953  | H | 0.23110540  | -2.72024262 | 0.62091477  |

**Table 63.** Geometric coordinates and thermally corrected MP2 energies for **6** spirocyclic dimer with three THF

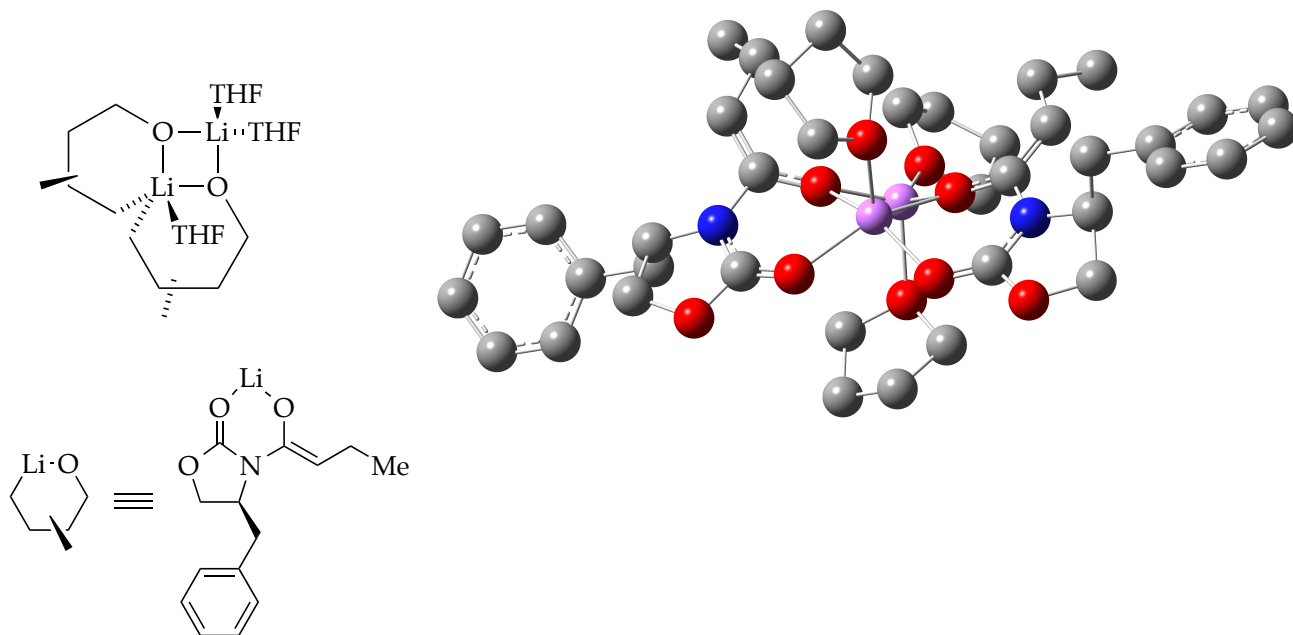

G = - 2358.93525 Hartree

G<sub>MP2</sub> = - 1475523.693 kcal/mol

ΔG<sub>MP2</sub> = -0.920884578 kcal/mol Li vs. **6** D<sub>2d</sub> tetramer

| Atom | X          | Y           | Z           | Atom | X           | Y           | Z           |
|------|------------|-------------|-------------|------|-------------|-------------|-------------|
| Li   | 0.00000000 | 0.00000000  | 0.00000000  | H    | 8.48191775  | 0.64486255  | -4.27464102 |
| Li   | 0.00000000 | 0.00000000  | 2.64404150  | H    | 10.22924292 | 0.09821046  | -2.58906335 |
| O    | 1.42685657 | 0.00000000  | 1.43175902  | H    | 9.55109319  | -0.63490582 | -0.30973369 |
| C    | 2.69099910 | -0.08648300 | 1.16659564  | H    | 7.15726575  | -0.81467429 | 0.27694190  |
| N    | 3.13858440 | 0.76870104  | 0.07122899  | C    | 3.62461421  | -0.85475878 | 1.79600961  |
| C    | 2.31128396 | 1.47697311  | -0.76160653 | H    | 4.65635059  | -0.84015029 | 1.46202782  |
| O    | 1.09574303 | 1.45772183  | -0.86974136 | C    | 3.31635085  | -1.75383307 | 2.96148104  |
| O    | 3.06325474 | 2.29121484  | -1.56624137 | H    | 3.33404981  | -2.81501043 | 2.65708915  |
| C    | 4.42740400 | 2.25248328  | -1.11257916 | H    | 2.29682978  | -1.55770110 | 3.31050770  |
| H    | 4.60494678 | 3.10945266  | -0.45159584 | C    | 4.30243161  | -1.58341655 | 4.13020420  |
| H    | 5.08315212 | 2.32161368  | -1.98206116 | H    | 4.08222216  | -2.27861055 | 4.95154263  |
| C    | 4.52985221 | 0.91735776  | -0.36610735 | H    | 5.33420991  | -1.77563464 | 3.80852521  |
| H    | 5.18771178 | 0.99642487  | 0.50304199  | H    | 4.27246348  | -0.56085668 | 4.52652287  |
| C    | 4.98353419 | -0.25203318 | -1.27845701 | O    | -1.28164588 | -0.75805988 | 1.50894099  |
| H    | 4.77110032 | -1.18758201 | -0.75155639 | C    | -2.38715753 | -1.34690015 | 1.18872769  |
| H    | 4.35730605 | -0.24273782 | -2.17889710 | N    | -3.29383050 | -0.54755415 | 0.35511721  |
| C    | 6.44633293 | -0.17289758 | -1.65649744 | C    | -4.74897259 | -0.50511379 | 0.51987638  |
| C    | 7.44379879 | -0.48350624 | -0.71922164 | C    | -5.13773922 | 0.38203474  | -0.67844572 |
| C    | 8.79498663 | -0.38564698 | -1.04985717 | H    | -5.45018262 | -0.21225379 | -1.54459780 |
| C    | 9.17654972 | 0.02437988  | -2.32958617 | H    | -5.91716738 | 1.10963248  | -0.44431818 |
| C    | 8.19655918 | 0.33174442  | -3.27363566 | O    | -3.93581869 | 1.09202590  | -1.02350340 |
| C    | 6.84461187 | 0.23359767  | -2.93738765 | C    | -2.86397859 | 0.41882319  | -0.50454670 |
| H    | 6.08641134 | 0.46481852  | -3.68269347 | O    | -1.72316123 | 0.70761354  | -0.83489637 |

|   |              |             |             |   |             |             |             |
|---|--------------|-------------|-------------|---|-------------|-------------|-------------|
| H | -5.17865151  | -1.50391629 | 0.40420269  | C | -0.83236028 | -3.31458507 | -2.06690662 |
| C | -5.16643706  | 0.06464461  | 1.89610927  | C | -0.20226541 | -1.94813565 | -2.33276588 |
| H | -4.62562354  | -0.50848390 | 2.65776446  | H | -0.91776053 | -1.14517312 | -2.52436002 |
| H | -4.82491323  | 1.10498260  | 1.96200202  | H | 0.51161517  | -1.99415440 | -3.16861306 |
| C | -6.65733390  | -0.01733415 | 2.13703830  | H | -1.74777052 | -3.19764545 | -1.47539727 |
| C | -7.47635425  | 1.11516021  | 2.03613258  | H | -1.07280196 | -3.85822343 | -2.98626361 |
| C | -8.85641568  | 1.02371206  | 2.23048228  | H | -0.12138511 | -4.81320582 | -0.60565180 |
| C | -9.44084881  | -0.20710470 | 2.52970982  | H | 1.04720622  | -4.39384408 | -1.86999089 |
| C | -8.63606116  | -1.34396035 | 2.63741919  | H | 1.86762451  | -2.87544287 | -0.18989343 |
| C | -7.25853168  | -1.24791752 | 2.44363731  | H | 0.27304961  | -2.74896186 | 0.58829053  |
| H | -6.63642219  | -2.13539590 | 2.54123584  |   |             |             |             |
| H | -9.08148490  | -2.30570189 | 2.87853327  |   |             |             |             |
| H | -10.51412191 | -0.28041259 | 2.68320212  |   |             |             |             |
| H | -9.47252348  | 1.91565852  | 2.15144631  |   |             |             |             |
| H | -7.02739171  | 2.08115096  | 1.81419633  |   |             |             |             |
| C | -2.82085092  | -2.59332134 | 1.52241659  |   |             |             |             |
| C | -2.08357255  | -3.52509045 | 2.44243882  |   |             |             |             |
| H | -1.77278405  | -4.43660086 | 1.90493637  |   |             |             |             |
| H | -1.15868859  | -3.04109526 | 2.77581558  |   |             |             |             |
| C | -2.91215217  | -3.95797597 | 3.66540409  |   |             |             |             |
| H | -3.83989191  | -4.45660922 | 3.35659640  |   |             |             |             |
| H | -2.35801328  | -4.65900855 | 4.30340609  |   |             |             |             |
| H | -3.19690190  | -3.09059705 | 4.27398861  |   |             |             |             |
| H | -3.75993360  | -2.95195184 | 1.10847377  |   |             |             |             |
| O | -0.46173907  | 1.98838671  | 2.96549211  |   |             |             |             |
| C | -1.86788729  | 2.32619928  | 2.97796390  |   |             |             |             |
| C | -2.04209644  | 3.55021079  | 2.05432729  |   |             |             |             |
| C | -0.71475019  | 3.60260825  | 1.27474999  |   |             |             |             |
| C | 0.27078432   | 3.03067644  | 2.28918318  |   |             |             |             |
| H | 0.58515780   | 3.78960550  | 3.02242670  |   |             |             |             |
| H | 1.14893577   | 2.55996831  | 1.84577762  |   |             |             |             |
| H | -0.44994925  | 4.61579244  | 0.95591635  |   |             |             |             |
| H | -0.75280759  | 2.96103684  | 0.38997402  |   |             |             |             |
| H | -2.17963533  | 4.46175828  | 2.64747606  |   |             |             |             |
| H | -2.90870940  | 3.44794260  | 1.39411569  |   |             |             |             |
| H | -2.40604887  | 1.44462753  | 2.62028670  |   |             |             |             |
| H | -2.17672024  | 2.53603921  | 4.00980688  |   |             |             |             |
| O | 0.21450421   | -0.47842068 | 4.58629646  |   |             |             |             |
| C | -0.09693307  | -1.68795882 | 5.30702048  |   |             |             |             |
| C | 0.17083317   | -1.36318031 | 6.77661261  |   |             |             |             |
| C | 1.35882512   | -0.39399607 | 6.67057749  |   |             |             |             |
| C | 1.01936006   | 0.40323548  | 5.40703068  |   |             |             |             |
| H | 1.90015786   | 0.69985571  | 4.83009714  |   |             |             |             |
| H | 0.42680584   | 1.29777277  | 5.62753722  |   |             |             |             |
| H | 2.29215708   | -0.95108920 | 6.53237933  |   |             |             |             |
| H | 1.47408414   | 0.24924830  | 7.54818069  |   |             |             |             |
| H | 0.39040487   | -2.25570503 | 7.37011649  |   |             |             |             |
| H | -0.69717247  | -0.86157632 | 7.22100429  |   |             |             |             |
| H | -1.13502173  | -1.95116528 | 5.09162471  |   |             |             |             |
| H | 0.55386926   | -2.49740370 | 4.94941087  |   |             |             |             |
| O | 0.50156167   | -1.62026944 | -1.12049062 |   |             |             |             |
| C | 0.78945454   | -2.82958611 | -0.37179027 |   |             |             |             |
| C | 0.25861125   | -3.99254304 | -1.22168393 |   |             |             |             |

**Table 64.** Geometric coordinates and thermally corrected MP2 energies for 6 S<sub>4</sub> tetramer

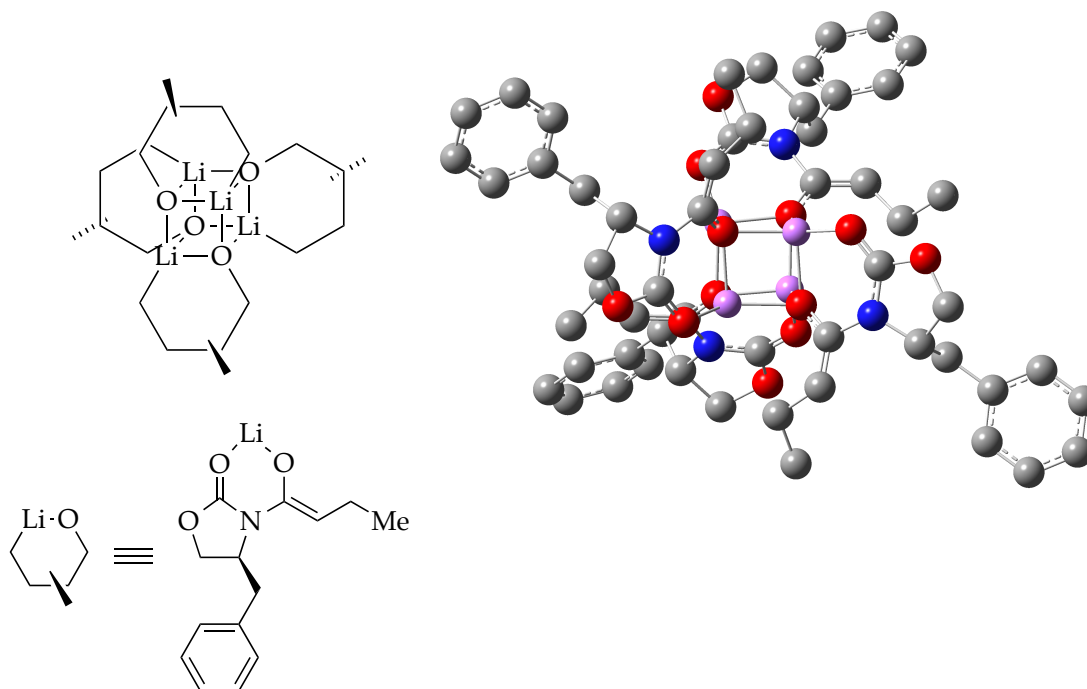

G = - 3323.810652 Hartree

G<sub>MP2</sub> = - 2079166.49 kcal/mol

ΔG<sub>MP2</sub> = 0.867684937 kcal/mol Li vs. 6 D<sub>2d</sub> tetramer

| Atom | X           | Y           | Z           | Atom | X           | Y           | Z           |
|------|-------------|-------------|-------------|------|-------------|-------------|-------------|
| Li   | 0.00000000  | 0.00000000  | 0.00000000  | H    | -2.94213511 | -4.68435329 | -0.99585664 |
| O    | 0.00000000  | 0.00000000  | 1.89041750  | N    | -1.16282136 | -3.61274388 | -1.40101251 |
| C    | 1.03901107  | 0.00000000  | 2.54440496  | C    | -1.47938923 | -2.24543547 | -1.01907917 |
| O    | 1.02139463  | 0.38480264  | 3.84700012  | O    | -0.55716310 | -1.35486810 | -1.31393585 |
| C    | 2.30005966  | 0.09502010  | 4.44063498  | Li   | -0.31207464 | 0.04738266  | -2.63429328 |
| H    | 2.21126307  | -0.83531077 | 5.01213236  | O    | -1.60364761 | 1.03446440  | -3.56095477 |
| H    | 2.56014277  | 0.91105288  | 5.11640863  | C    | -1.91576903 | 2.18189301  | -3.25903491 |
| C    | 3.26241121  | -0.04392567 | 3.24979762  | O    | -2.90292226 | 2.80987864  | -3.95211912 |
| H    | 3.93197254  | -0.89219485 | 3.40825960  | C    | -3.22333628 | 4.04508670  | -3.28671687 |
| N    | 2.30827350  | -0.33682390 | 2.16987644  | H    | -4.09118466 | 3.87679359  | -2.63920648 |
| C    | 2.71439402  | -0.76696649 | 0.84109527  | H    | -3.47005255 | 4.79129539  | -4.04301241 |
| O    | 1.91241571  | -0.39964658 | -0.13484599 | C    | -1.95744974 | 4.37284329  | -2.48895341 |
| Li   | 1.36285492  | -1.67509213 | -1.52903981 | H    | -2.21356674 | 4.81304949  | -1.52300426 |
| O    | 1.18298699  | -3.55688509 | -1.51823002 | N    | -1.41456119 | 3.01781176  | -2.29714471 |
| C    | 0.09110637  | -4.11004652 | -1.61338108 | C    | -0.40075404 | 2.69672044  | -1.30271572 |
| O    | 0.02087506  | -5.41402667 | -1.98734793 | O    | 0.04907774  | 1.46212082  | -1.33967223 |
| C    | -1.33005263 | -5.88027320 | -1.81712537 | Li   | 1.92726838  | 0.91711451  | -1.56156213 |
| H    | -1.38406311 | -6.44372202 | -0.87924344 | O    | 3.38835094  | 1.70336368  | -2.42656579 |
| H    | -1.57521714 | -6.54058538 | -2.65025418 | C    | 3.77699873  | 1.35653670  | -3.53734448 |
| C    | -2.18351049 | -4.60218095 | -1.77734033 | O    | 4.88035714  | 1.94425932  | -4.07249499 |



|   |             |             |              |   |             |             |             |
|---|-------------|-------------|--------------|---|-------------|-------------|-------------|
| C | 5.25089171  | 1.23355895  | -5.26780698  | H | -2.76628187 | 10.38792410 | -3.57621498 |
| H | 6.03345544  | 0.50972046  | -5.01402957  | C | -2.67260618 | -2.00252397 | -0.42737430 |
| H | 5.63763543  | 1.95220909  | -5.99144385  | H | -3.32136734 | -2.83559447 | -0.17400721 |
| C | 3.95134706  | 0.55386227  | -5.70997481  | C | -3.17476685 | -0.62948512 | -0.06850120 |
| H | 4.15469508  | -0.43826729 | -6.11834298  | H | -3.12680154 | -0.47473798 | 1.02094033  |
| N | 3.26749765  | 0.43394847  | -4.41166676  | H | -2.52212465 | 0.13143840  | -0.51379824 |
| C | 2.13797655  | -0.45577646 | -4.18281567  | C | -4.61856192 | -0.38105211 | -0.53685330 |
| O | 1.57943316  | -0.35845481 | -2.99685468  | H | -4.69293905 | -0.44127148 | -1.62899810 |
| C | 1.76336020  | -1.29758212 | -5.17812580  | H | -5.30541074 | -1.12566272 | -0.11430488 |
| H | 2.30787086  | -1.30443144 | -6.11531826  | H | -4.97282388 | 0.60874759  | -0.22358523 |
| C | 0.63163761  | -2.28351766 | -5.07565892  | C | -2.86417533 | -4.24227009 | -3.11853884 |
| H | 0.12568317  | -2.17420301 | -4.10985538  | H | -3.23549061 | -3.21551337 | -3.02779702 |
| H | -0.12647784 | -2.06283190 | -5.84392035  | H | -2.10350652 | -4.24458437 | -3.90865280 |
| C | 1.08965261  | -3.74357166 | -5.24517058  | C | -3.99478918 | -5.18425093 | -3.46916048 |
| H | 1.77653700  | -4.03286016 | -4.44299626  | C | -5.22450840 | -5.09758886 | -2.79869336 |
| H | 0.23675609  | -4.43458798 | -5.22722867  | H | -5.37078578 | -4.32205121 | -2.04955114 |
| H | 1.60816488  | -3.88566575 | -6.20188444  | C | -6.26386261 | -5.97981897 | -3.09155865 |
| C | 3.13019722  | 1.39449211  | -6.71957684  | H | -7.21044230 | -5.89262400 | -2.56454172 |
| H | 2.12189904  | 0.97076419  | -6.76534692  | C | -6.09264053 | -6.96716011 | -4.06489795 |
| H | 3.03405894  | 2.41135274  | -6.31948625  | C | -4.87753628 | -7.06125321 | -4.74364134 |
| C | 3.75535665  | 1.43067815  | -8.09713205  | C | -3.83866419 | -6.17646270 | -4.44628561 |
| C | 3.67427359  | 0.31508509  | -8.94452260  | H | -2.89880332 | -6.24777374 | -4.98984311 |
| H | 3.12793198  | -0.56725604 | -8.61735333  | H | -4.73712031 | -7.82015397 | -5.50893756 |
| C | 4.27062151  | 0.32719644  | -10.20489802 | H | -6.90304388 | -7.65315986 | -4.29611886 |
| H | 4.19208377  | -0.54583797 | -10.84749246 | C | 3.86339857  | -1.47199809 | 0.71619272  |
| C | 4.96028625  | 1.45993014  | -10.64368868 | H | 4.40374180  | -1.77309856 | 1.60864078  |
| C | 5.04474807  | 2.57848649  | -9.81434071  | C | 4.45619277  | -1.89672231 | -0.60077194 |
| C | 4.44695320  | 2.56147276  | -8.55223414  | H | 4.31950824  | -2.97894678 | -0.75320258 |
| H | 4.50623591  | 3.44286017  | -7.91689875  | H | 3.92350480  | -1.40311140 | -1.42285934 |
| H | 5.57199349  | 3.46791124  | -10.14929673 | C | 5.95497271  | -1.57021543 | -0.71333193 |
| H | 5.42282959  | 1.47154226  | -11.62688129 | H | 6.12698479  | -0.48917345 | -0.65252595 |
| C | -0.01410267 | 3.66459643  | -0.43477005  | H | 6.52526128  | -2.04461447 | 0.09566271  |
| H | -0.46519079 | 4.64890169  | -0.48509765  | H | 6.36945820  | -1.92999378 | -1.66312224 |
| C | 1.00479064  | 3.47048804  | 0.65497526   | C | 4.09867658  | 1.22162896  | 2.94863810  |
| H | 1.42449878  | 2.45978093  | 0.59987333   | H | 4.55476204  | 1.08110471  | 1.96244535  |
| H | 1.85003020  | 4.16052488  | 0.50302974   | H | 3.41994303  | 2.07990655  | 2.87395215  |
| C | 0.42948146  | 3.70397087  | 2.06379330   | C | 5.16372132  | 1.47792871  | 3.99196484  |
| H | -0.35483713 | 2.97445179  | 2.29100720   | C | 6.32661867  | 0.69325456  | 4.02665203  |
| H | 1.20786772  | 3.61597745  | 2.83296770   | H | 6.47327386  | -0.07772151 | 3.27289010  |
| H | -0.00667137 | 4.70728050  | 2.15035220   | C | 7.30135670  | 0.89978102  | 5.00214683  |
| C | -0.96846322 | 5.28818875  | -3.25333977  | H | 8.19738891  | 0.28459907  | 5.00851718  |
| H | -0.00479856 | 5.24503380  | -2.73584886  | C | 7.13138458  | 1.89940915  | 5.96308361  |
| H | -0.81546103 | 4.86592799  | -4.25414359  | C | 5.98306056  | 2.69105517  | 5.93713648  |
| C | -1.45353926 | 6.71780740  | -3.35669660  | C | 5.00861261  | 2.47997685  | 4.95916510  |
| C | -1.98889658 | 7.21939707  | -4.55081443  | H | 4.12231397  | 3.11075786  | 4.93752509  |
| H | -2.02492503 | 6.57961500  | -5.43024045  | H | 5.84531951  | 3.47731221  | 6.67480346  |
| C | -2.45961275 | 8.53180924  | -4.63184792  | H | 7.89185753  | 2.06326888  | 6.72179660  |
| H | -2.86630841 | 8.90186230  | -5.56935485  |   |             |             |             |
| C | -2.40255158 | 9.36581504  | -3.51502336  |   |             |             |             |
| C | -1.86774275 | 8.88067050  | -2.31924971  |   |             |             |             |
| C | -1.39783265 | 7.57004880  | -2.24324300  |   |             |             |             |
| H | -0.97080030 | 7.20583875  | -1.31101563  |   |             |             |             |
| H | -1.81115957 | 9.52573878  | -1.44634071  |   |             |             |             |

**Table 65.** Geometric coordinates and thermally corrected MP2 energies for 6  $D_{2d}$  tetramer

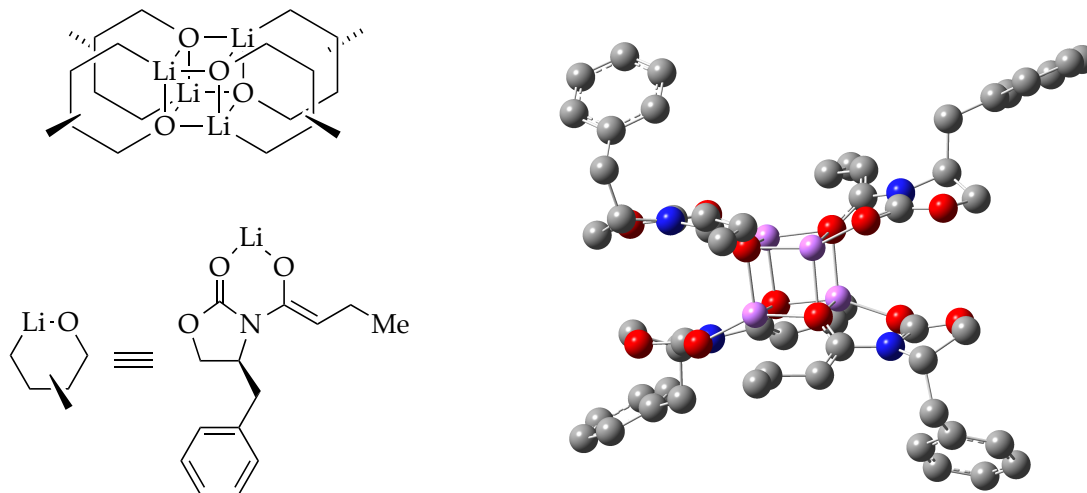

G = - 3323.803718 Hartree  
 $G_{\text{MP2}} = - 2079169.961$  kcal/mol  
 $\Delta G_{\text{MP2}} = 0.0$  kcal/mol Li vs. 6 tetramer

| Atom | X          | Y           | Z           | Atom | X           | Y           | Z           |
|------|------------|-------------|-------------|------|-------------|-------------|-------------|
| Li   | 0.00000000 | 0.00000000  | 0.00000000  | O    | 0.20623812  | 3.04334315  | -5.07420755 |
| O    | 0.00000000 | 0.00000000  | 1.89606150  | C    | -1.17196529 | 2.98962765  | -5.51680026 |
| C    | 1.05872974 | 0.00000000  | 2.51655724  | H    | -1.31665228 | 2.05574199  | -6.06816275 |
| O    | 1.13935282 | -0.60632017 | 3.72982399  | H    | -1.35343423 | 3.84722458  | -6.16563436 |
| C    | 2.51596600 | -0.60470732 | 4.16232353  | C    | -1.96828020 | 3.02579054  | -4.20801765 |
| H    | 2.94042296 | -1.59087178 | 3.95064096  | H    | -2.86781239 | 2.40840902  | -4.26022077 |
| H    | 2.52515513 | -0.41139920 | 5.23622264  | N    | -0.99398175 | 2.38858026  | -3.30952956 |
| C    | 3.17920584 | 0.50745228  | 3.33229682  | C    | -1.33616793 | 1.63903994  | -2.11386966 |
| H    | 4.16944382 | 0.20556421  | 2.97929316  | C    | -2.54988688 | 1.82900054  | -1.54494206 |
| N    | 2.26402940 | 0.54933700  | 2.18345240  | H    | -3.21209586 | 2.59315041  | -1.93680444 |
| C    | 2.63495844 | 0.97134542  | 0.84438330  | C    | -3.05793934 | 1.04426554  | -0.36386659 |
| C    | 3.68879748 | 1.80541919  | 0.68039442  | H    | -2.51380417 | 0.09448808  | -0.28225470 |
| H    | 4.19052783 | 2.21496455  | 1.54908226  | H    | -2.86493419 | 1.58259312  | 0.57888667  |
| C    | 4.23080331 | 2.21671987  | -0.66371973 | C    | -4.56244576 | 0.74615390  | -0.45377824 |
| H    | 3.80017144 | 3.17977338  | -0.98447458 | H    | -5.14536715 | 1.67379935  | -0.52156850 |
| H    | 3.93246691 | 1.48661982  | -1.42749309 | H    | -4.79190589 | 0.14396400  | -1.34053193 |
| C    | 5.76208925 | 2.34250564  | -0.67285814 | H    | -4.91225163 | 0.19947840  | 0.42973038  |
| H    | 6.10266831 | 3.07764785  | 0.06746809  | O    | -0.41417782 | 0.78706319  | -1.72393503 |
| H    | 6.23715025 | 1.38436843  | -0.43205164 | Li   | -0.02671083 | -1.00978836 | -2.49757812 |
| H    | 6.12735786 | 2.66690750  | -1.65426398 | O    | -0.32175009 | -1.06019622 | -4.37001753 |
| O    | 1.90894628 | 0.44047400  | -0.11502547 | C    | 0.56563543  | -0.72226740 | -5.14736859 |
| Li   | 1.52568693 | 1.01337243  | -1.92772842 | O    | 0.24886030  | -0.15636294 | -6.34133401 |
| O    | 1.35426419 | 2.35462433  | -3.27000996 | C    | 1.46154218  | 0.29138364  | -6.98247615 |
| C    | 0.26635600 | 2.55669429  | -3.80291494 | H    | 1.55897864  | 1.36798474  | -6.81240779 |

|    |             |             |             |   |             |             |             |
|----|-------------|-------------|-------------|---|-------------|-------------|-------------|
| H  | 1.36764448  | 0.08386911  | -8.04963710 | C | 1.95399343  | -2.76101481 | -7.43425284 |
| C  | 2.57931195  | -0.51219229 | -6.29646375 | C | 1.33574312  | -2.80122078 | -8.69122375 |
| H  | 3.45357647  | 0.11296298  | -6.09356631 | C | 0.33297392  | -3.73173878 | -8.96870438 |
| N  | 1.92151395  | -0.82741278 | -5.02090536 | C | -0.06605355 | -4.64150551 | -7.98922924 |
| C  | 2.61570062  | -1.06557089 | -3.76790048 | C | 0.54993488  | -4.62047722 | -6.73603396 |
| C  | 3.89943692  | -1.49511740 | -3.79230665 | C | 1.55372698  | -3.69123787 | -6.46234756 |
| H  | 4.36774508  | -1.73685326 | -4.73904118 | H | 2.03682055  | -3.68805242 | -5.48841038 |
| C  | 4.74879298  | -1.66620457 | -2.55977723 | H | 0.25284663  | -5.33169173 | -5.96995344 |
| H  | 4.71216782  | -2.70679680 | -2.19691540 | H | -0.84637551 | -5.36710951 | -8.20247869 |
| H  | 4.35126446  | -1.05038014 | -1.74229435 | H | -0.13219893 | -3.74747146 | -9.95092494 |
| C  | 6.21863353  | -1.28541419 | -2.79459700 | H | 1.65065915  | -2.10502081 | -9.46627506 |
| H  | 6.66083050  | -1.89168454 | -3.59547711 | C | -2.32206957 | 4.47073372  | -3.77020777 |
| H  | 6.31086454  | -0.23260195 | -3.08577740 | H | -2.64173711 | 4.44980412  | -2.72372653 |
| H  | 6.81822321  | -1.44268229 | -1.89041641 | H | -1.40574714 | 5.07260634  | -3.80633107 |
| O  | 1.91292173  | -0.78229656 | -2.69306807 | C | -3.39323730 | 5.09803460  | -4.63708849 |
| Li | 2.03143837  | -1.40127781 | -0.85896577 | C | -4.72760319 | 4.67452572  | -4.53876212 |
| O  | 2.53004235  | -2.68521015 | 0.45759135  | C | -5.71704149 | 5.22976417  | -5.34932549 |
| C  | 1.66956611  | -3.22516575 | 1.14780296  | C | -5.38987518 | 6.22318923  | -6.27537745 |
| O  | 1.97429804  | -3.66868813 | 2.39962024  | C | -4.06833124 | 6.65683865  | -6.38145326 |
| C  | 0.74430544  | -4.06757378 | 3.05251307  | C | -3.08018193 | 6.09695944  | -5.56853114 |
| H  | 0.38272341  | -3.22135495 | 3.64432779  | H | -2.05372413 | 6.44871623  | -5.64917122 |
| H  | 0.96382299  | -4.91829814 | 3.69863051  | H | -3.80418516 | 7.43396507  | -7.09390308 |
| C  | -0.18705782 | -4.40420911 | 1.88306830  | H | -6.16088997 | 6.65819419  | -6.90550625 |
| H  | -1.22170778 | -4.12254634 | 2.09095450  | H | -6.74512252 | 4.89009248  | -5.25496832 |
| N  | 0.36528777  | -3.50240026 | 0.86120231  | H | -4.99523904 | 3.90785495  | -3.81436815 |
| C  | -0.38950901 | -2.94387880 | -0.24635144 | C | 3.31722858  | 1.84549111  | 4.11207398  |
| C  | -1.54208598 | -3.54484099 | -0.62483232 | H | 3.98763929  | 1.64269649  | 4.95778493  |
| C  | -2.45989333 | -3.00761958 | -1.69162455 | H | 3.83551495  | 2.56936820  | 3.47683246  |
| H  | -2.28924930 | -1.93167660 | -1.82632685 | C | 2.02225567  | 2.44759574  | 4.61295642  |
| H  | -2.24193421 | -3.47055886 | -2.66837793 | C | 1.62983471  | 2.31308164  | 5.95151465  |
| C  | -3.94387870 | -3.23602817 | -1.36610627 | C | 0.42956149  | 2.86153850  | 6.40642628  |
| H  | -4.16019820 | -4.30462294 | -1.23872637 | C | -0.39829016 | 3.55797140  | 5.52556808  |
| H  | -4.22580791 | -2.72685669 | -0.43718896 | C | -0.01380803 | 3.70989209  | 4.19159746  |
| H  | -4.58871095 | -2.86148931 | -2.16965717 | C | 1.18758233  | 3.16309463  | 3.74031017  |
| H  | -1.84077735 | -4.47577916 | -0.15565620 | H | 1.48604535  | 3.29502483  | 2.70326931  |
| O  | 0.12114425  | -1.84315452 | -0.75198455 | H | -0.64724686 | 4.25928240  | 3.50029935  |
| C  | -0.09990232 | -5.89561587 | 1.46736773  | H | -1.33322979 | 3.98609869  | 5.87695705  |
| H  | -0.56670326 | -6.01162899 | 0.48431919  | H | 0.14484428  | 2.74766001  | 7.44919103  |
| H  | 0.95887071  | -6.15462783 | 1.34441740  | H | 2.27620056  | 1.78403012  | 6.64928748  |
| C  | -0.75044694 | -6.82142879 | 2.47337791  |   |             |             |             |
| C  | 0.01990776  | -7.63172825 | 3.31801293  |   |             |             |             |
| C  | -0.58446903 | -8.46770328 | 4.25961924  |   |             |             |             |
| C  | -1.97435906 | -8.50493160 | 4.37189417  |   |             |             |             |
| C  | -2.75514330 | -7.70439389 | 3.53462773  |   |             |             |             |
| C  | -2.14764688 | -6.87228898 | 2.59502917  |   |             |             |             |
| H  | -2.76579639 | -6.25981510 | 1.94163315  |   |             |             |             |
| H  | -3.83900794 | -7.73149985 | 3.61034149  |   |             |             |             |
| H  | -2.44719487 | -9.15558835 | 5.10252843  |   |             |             |             |
| H  | 0.03208703  | -9.09152242 | 4.90148348  |   |             |             |             |
| H  | 1.10418193  | -7.61693930 | 3.22867403  |   |             |             |             |
| C  | 3.03398426  | -1.74705416 | -7.12462820 |   |             |             |             |
| H  | 3.45745508  | -1.35408040 | -8.05846350 |   |             |             |             |
| H  | 3.85688676  | -2.23848770 | -6.59787700 |   |             |             |             |

## Part 7: Tetramer Computations

Geometries are optimized at the B3LYP level of theory using the 6-31G(d) basis set. Energies are defined as follows:  $G$  is the sum of electronic and thermal free energies calculated at the B3LYP level of theory ( $T = 195$  K).  $G_{\text{MP2}}$  is derived from an MP2 SP calculation corresponding to the DFT-optimized geometry and includes a thermal correction from the DFT calculation.

**Table 66.** Geometric coordinates and thermally corrected MP2 energies for **30**  $D_{2d}$  tetramer

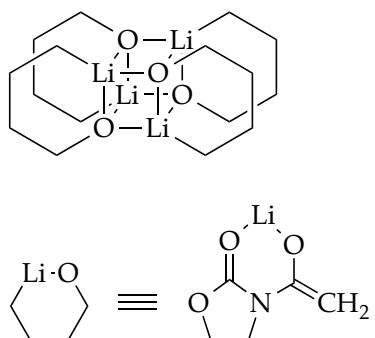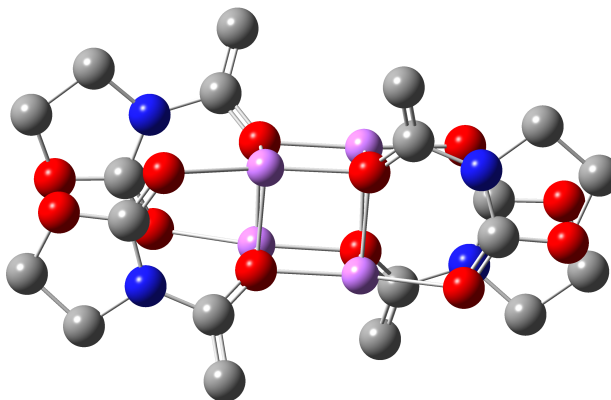

$G = -1928.469207$  Hartree  
 $G_{\text{MP2}} = -1206550.771$  kcal/mol  
 $\Delta G_{\text{MP2}} = 0.0$  kcal/mol Li vs. **30**  $D_{2d}$  tetramer

| Atom | X            | Y           | Z           | Atom | X            | Y           | Z           |
|------|--------------|-------------|-------------|------|--------------|-------------|-------------|
| C    | 0.00000000   | 0.00000000  | 0.00000000  | H    | -11.05478252 | 1.71672864  | -5.19443396 |
| H    | 0.00000000   | 0.00000000  | 1.10595930  | C    | -9.57695876  | 2.67191073  | -3.81917142 |
| H    | 1.02202664   | 0.00000000  | -0.40665553 | H    | -9.86791047  | 3.23971948  | -2.90805047 |
| O    | -0.56412657  | 1.30157169  | -0.38312248 | H    | -9.40319163  | 3.40328548  | -4.63679727 |
| C    | -1.79319532  | 1.12101945  | -1.01570045 | O    | -7.80476399  | -0.43212379 | -3.75403705 |
| N    | -2.04772055  | -0.23815300 | -1.17507871 | Li   | -6.21050266  | -0.34902967 | -2.28740655 |
| C    | -3.26087572  | -0.87191989 | -1.71885907 | O    | -7.06192467  | -0.53656660 | -0.35532703 |
| O    | -4.31565077  | -0.17921553 | -1.46609798 | C    | -7.93259389  | -1.46601550 | -0.17004969 |
| Li   | -4.59357363  | 1.89869133  | -1.42880622 | N    | -9.26265464  | -1.07600193 | -0.66793067 |
| O    | -2.43738597  | 2.10350997  | -1.33594294 | C    | -9.81521768  | 0.20066306  | -0.71636327 |
| O    | -6.51056335  | 1.72405411  | -2.19531182 | O    | -11.06065314 | 0.15417154  | -1.34094803 |
| C    | -7.13208530  | 2.51074027  | -3.00222690 | C    | -11.32502390 | -1.20434177 | -1.83455680 |
| N    | -8.33934144  | 1.87826991  | -3.56041889 | H    | -11.33738553 | -1.11339469 | -2.93668261 |
| C    | -8.54879025  | 0.52884980  | -3.83009303 | H    | -12.31678524 | -1.46553194 | -1.43692638 |
| O    | -9.85710764  | 0.33121984  | -4.26897234 | C    | -10.17243478 | -2.07497461 | -1.30267942 |
| C    | -10.60728951 | 1.59264586  | -4.19730105 | H    | -9.64021518  | -2.62059463 | -2.11275686 |
| H    | -11.37752652 | 1.42637855  | -3.42128328 | H    | -10.51034533 | -2.82126035 | -0.55267875 |

|    |             |             |             |
|----|-------------|-------------|-------------|
| O  | -9.40254931 | 1.27230325  | -0.31123401 |
| Li | -7.25427903 | 1.54658516  | -0.21811117 |
| O  | -5.33950714 | 1.74166882  | 0.54939135  |
| C  | -4.90231414 | 2.57819528  | 1.42422949  |
| N  | -3.58053372 | 2.18639888  | 1.94227921  |
| C  | -3.07344397 | 0.89994397  | 2.10177577  |
| O  | -1.75078126 | 0.96302914  | 2.53765193  |
| C  | -1.30131257 | 2.36136971  | 2.57898971  |
| H  | -0.51928784 | 2.43604798  | 1.80056704  |
| H  | -0.88522791 | 2.49869414  | 3.58791945  |
| C  | -2.54918500 | 3.21150520  | 2.27993807  |
| H  | -2.39901225 | 3.90380003  | 1.42239716  |
| H  | -2.87560345 | 3.81500110  | 3.15336476  |
| O  | -3.58490457 | -0.19296250 | 1.93810172  |
| Li | -5.16928787 | -0.34624590 | 0.46672184  |
| C  | -5.48822363 | 3.71084633  | 1.84282257  |
| H  | -6.43164725 | 4.04675637  | 1.45600802  |
| H  | -5.09890176 | 4.36303453  | 2.59695033  |
| C  | -7.73579855 | -2.68204074 | 0.36281142  |
| H  | -8.49954116 | -3.41438052 | 0.52415137  |
| H  | -6.77119244 | -3.01341206 | 0.69782239  |
| C  | -6.81708552 | 3.77546081  | -3.32259511 |
| H  | -5.96775136 | 4.28019487  | -2.90260934 |
| H  | -7.34977766 | 4.38374101  | -4.02394110 |
| C  | -3.18519274 | -2.05190111 | -2.35389545 |
| H  | -4.05397544 | -2.56085944 | -2.72631315 |
| H  | -2.27841648 | -2.57898417 | -2.56742315 |
| C  | -0.93354243 | -1.05842859 | -0.61448607 |
| H  | -1.32477903 | -1.77383100 | 0.14202721  |
| H  | -0.44343498 | -1.64619564 | -1.41944030 |

**Table 67.** Geometric coordinates and thermally corrected MP2 energies for **30**  $S_4$  tetramer

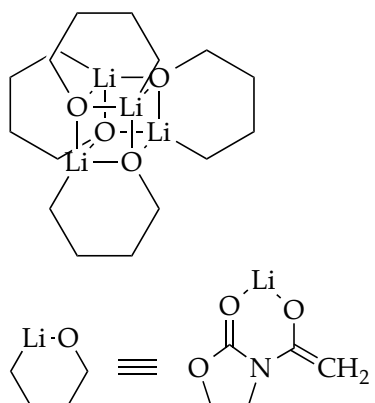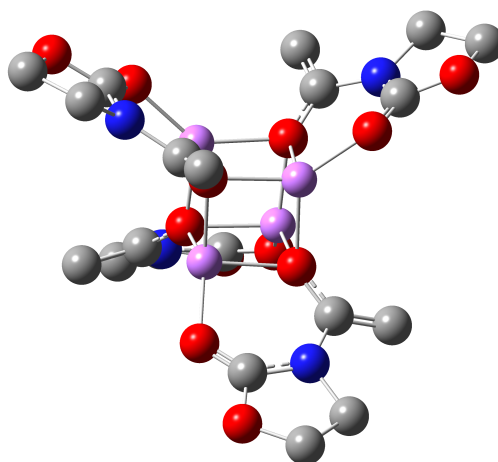

$G = -1928.471624$  Hartree

$G_{\text{MP2}} = -1206544.781$  kcal/mol

$\Delta G_{\text{MP2}} = 1.497452719$  kcal/mol Li vs. **30**  $D_{2d}$  tetramer

| Atom | X           | Y           | Z           | Atom | X           | Y           | Z           |
|------|-------------|-------------|-------------|------|-------------|-------------|-------------|
| Li   | 0.00000000  | 0.00000000  | 0.00000000  | O    | -3.28863090 | 2.86182952  | -3.30493357 |
| O    | 0.00000000  | 0.00000000  | 1.89154310  | C    | -3.71239726 | 3.88909530  | -2.38986970 |
| C    | 1.03981492  | 0.00000000  | 2.53944564  | H    | -4.51473301 | 3.48329620  | -1.76414957 |
| N    | 2.32240599  | -0.26420911 | 2.14124019  | H    | -4.09462088 | 4.72932306  | -2.97188085 |
| C    | 3.20653179  | -0.33871641 | 3.30062953  | C    | -2.45393877 | 4.21810349  | -1.57895150 |
| C    | 2.36422671  | 0.37781159  | 4.36209901  | N    | -1.66732322 | 3.00373516  | -1.77374500 |
| H    | 2.40006766  | -0.09322606 | 5.34579393  | C    | -0.43019853 | 2.76188224  | -1.06324984 |
| H    | 2.62717029  | 1.43715767  | 4.45472323  | O    | 0.05861571  | 1.55233313  | -1.19531325 |
| O    | 1.01532639  | 0.28793187  | 3.86753003  | Li   | 1.94566055  | 1.07556623  | -1.46641297 |
| H    | 3.41416570  | -1.38422228 | 3.56388482  | O    | 3.46315652  | 1.88394312  | -2.25528817 |
| H    | 4.15512468  | 0.16406923  | 3.09700008  | C    | 3.97881910  | 1.43816708  | -3.27330935 |
| C    | 2.74332841  | -0.67912158 | 0.82041987  | O    | 5.21667068  | 1.85507979  | -3.64915740 |
| O    | 1.91338952  | -0.37475700 | -0.14804186 | C    | 5.66166672  | 1.07665591  | -4.77531836 |
| Li   | 1.40396223  | -1.52483637 | -1.65786882 | H    | 6.36627797  | 0.31979787  | -4.41389802 |
| O    | 1.24772885  | -3.38355837 | -1.97278153 | H    | 6.17066085  | 1.74394671  | -5.47278718 |
| C    | 0.16287365  | -3.91896519 | -2.16621587 | C    | 4.37873437  | 0.45392817  | -5.33733732 |
| O    | 0.10535188  | -5.18058498 | -2.66856264 | H    | 4.51099065  | -0.58310909 | -5.65538285 |
| C    | -1.26471575 | -5.52093660 | -2.95011900 | N    | 3.49618795  | 0.53038710  | -4.17687070 |
| H    | -1.42718019 | -6.55870174 | -2.65437542 | C    | 2.18690237  | -0.08553521 | -4.15962108 |
| H    | -1.43054795 | -5.41820221 | -4.02802539 | O    | 1.59523134  | -0.09942992 | -2.98954532 |
| C    | -2.08186906 | -4.50976672 | -2.13809004 | C    | 1.70632722  | -0.61249828 | -5.30872768 |
| H    | -2.41059708 | -4.91411622 | -1.17169117 | H    | 2.22377895  | -0.54921887 | -6.25620586 |
| N    | -1.10200280 | -3.44478900 | -1.94559774 | H    | 0.74593794  | -1.11350932 | -5.29238713 |
| C    | -1.45055991 | -2.17173598 | -1.35256342 | C    | 0.09015536  | 3.76085708  | -0.31466095 |
| O    | -0.51821264 | -1.25245144 | -1.42321190 | H    | -0.33852895 | 4.75229160  | -0.26187440 |
| Li   | -0.30065411 | 0.27519856  | -2.63170630 | H    | 0.99254601  | 3.57199345  | 0.25424780  |
| O    | -1.66204973 | 1.32577721  | -3.42000198 | H    | -2.65954633 | 4.38011484  | -0.51802465 |
| C    | -2.13256079 | 2.30606249  | -2.85551480 | H    | -1.91909833 | 5.09386229  | -1.96944465 |

|   |             |             |             |
|---|-------------|-------------|-------------|
| C | -2.68466920 | -2.02442380 | -0.81927627 |
| H | -3.40884802 | -2.82545934 | -0.76098061 |
| H | -2.96681301 | -1.06059776 | -0.41299702 |
| H | -2.95733785 | -4.13772763 | -2.67588696 |
| C | 3.93837992  | -1.29850213 | 0.68874943  |
| H | 4.57426676  | -1.55209389 | 1.52589280  |
| H | 4.27864263  | -1.57245193 | -0.30261167 |
| H | 3.96586932  | 1.02763756  | -6.17751151 |

**Table 68.** Geometric coordinates and thermally corrected MP2 energies for **31**  $D_{2d}$  tetramer

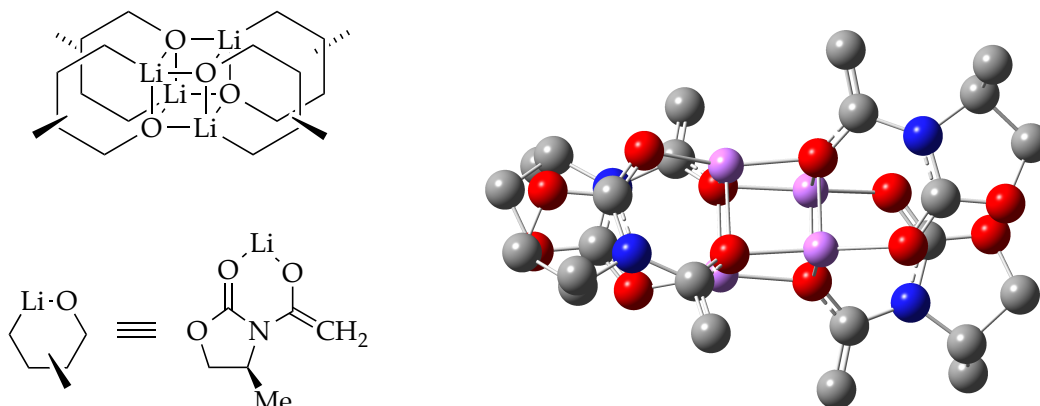

$G = -2085.622761$  Hartree

$G_{\text{MP2}} = -1304802.017$  kcal/mol

$\Delta G_{\text{MP2}} = 0.0$  kcal/mol Li vs. **31**  $D_{2d}$  tetramer

| Atom | X           | Y           | Z           | Atom | X           | Y           | Z           |
|------|-------------|-------------|-------------|------|-------------|-------------|-------------|
| Li   | 0.00000000  | 0.00000000  | 0.00000000  | O    | -0.28351768 | -1.09491846 | -4.38407154 |
| O    | 0.00000000  | 0.00000000  | 1.90900000  | C    | 0.63253600  | -0.80584742 | -5.14776364 |
| C    | 1.05635845  | 0.00000000  | 2.53354127  | O    | 0.35649622  | -0.32723874 | -6.39378352 |
| O    | 1.10250978  | -0.51236596 | 3.79575238  | C    | 1.59247026  | 0.12144461  | -6.99627256 |
| C    | 2.48572129  | -0.57721434 | 4.21343985  | H    | 1.68279304  | 1.19884822  | -6.82562301 |
| H    | 2.85559641  | -1.58716176 | 4.01027393  | H    | 1.54116578  | -0.09203161 | -8.06554571 |
| H    | 2.52309319  | -0.36583172 | 5.28370527  | C    | 2.67199454  | -0.68194833 | -6.25811532 |
| C    | 3.17870188  | 0.48599809  | 3.35028208  | H    | 3.56720707  | -0.08098188 | -6.07997869 |
| H    | 4.17490093  | 0.16225707  | 3.03870509  | N    | 1.98298536  | -0.89750367 | -4.97511887 |
| N    | 2.28729635  | 0.46995314  | 2.17877832  | C    | 2.66351832  | -1.09178999 | -3.71202641 |
| C    | 2.70364549  | 0.82498534  | 0.83829806  | C    | 3.97717857  | -1.41149459 | -3.70937317 |
| C    | 3.85794700  | 1.50634887  | 0.66151043  | H    | 4.54749892  | -1.60068445 | -4.60776731 |
| H    | 4.46836991  | 1.86855610  | 1.47659016  | H    | 4.49476244  | -1.48298780 | -2.76007064 |
| H    | 4.19793071  | 1.70350881  | -0.34830196 | O    | 1.91823974  | -0.87568663 | -2.65474040 |
| O    | 1.91314611  | 0.38381838  | -0.11063748 | Li   | 2.00624586  | -1.47849633 | -0.81577169 |
| Li   | 1.57168746  | 0.94948705  | -1.93172163 | O    | 2.42313420  | -2.73493297 | 0.55939616  |
| O    | 1.41927131  | 2.24469060  | -3.32554094 | C    | 1.53258181  | -3.23642191 | 1.23869891  |
| C    | 0.33804566  | 2.45719754  | -3.86574149 | O    | 1.80686153  | -3.69180088 | 2.49378596  |
| O    | 0.29562307  | 2.94662433  | -5.13716112 | C    | 0.55898947  | -4.03525100 | 3.13925840  |
| C    | -1.07472414 | 2.90638280  | -5.59792650 | H    | 0.23996747  | -3.17843277 | 3.74107518  |
| H    | -1.21534531 | 1.98222558  | -6.16735916 | H    | 0.73880966  | -4.90288462 | 3.77676439  |
| H    | -1.23956735 | 3.77624154  | -6.23644738 | C    | -0.39293940 | -4.31671990 | 1.96870733  |
| C    | -1.89705758 | 2.92775048  | -4.30220392 | H    | -1.40221278 | -3.95286197 | 2.17670699  |
| H    | -2.77897788 | 2.28670685  | -4.37680679 | N    | 0.21884844  | -3.45631925 | 0.94263982  |
| N    | -0.93006265 | 2.29872024  | -3.38753131 | C    | -0.50906805 | -2.87254711 | -0.16443855 |
| C    | -1.30157864 | 1.55382257  | -2.20289185 | C    | -1.72857782 | -3.35974650 | -0.48614892 |
| C    | -2.55312341 | 1.67890067  | -1.70685284 | H    | -2.17568516 | -4.21712357 | -0.00330128 |
| H    | -3.28836760 | 2.36301613  | -2.10628442 | H    | -2.29622509 | -2.86971127 | -1.26834478 |
| H    | -2.84406930 | 1.06304414  | -0.86408285 | O    | 0.09020195  | -1.85318055 | -0.73155816 |
| O    | -0.36415888 | 0.75966347  | -1.74418263 | C    | -0.41376351 | -5.79598656 | 1.56573678  |
| Li   | -0.02109779 | -1.05646188 | -2.49358397 | H    | -0.95151834 | -5.94472703 | 0.62662875  |



|   |             |             |             |
|---|-------------|-------------|-------------|
| H | 0.60783913  | -6.17134671 | 1.43671666  |
| H | -0.90390483 | -6.39157579 | 2.34480383  |
| C | 3.02303647  | -1.99391072 | -6.96988469 |
| H | 3.55925944  | -1.78426393 | -7.90284851 |
| H | 3.65317980  | -2.62975742 | -6.34390883 |
| H | 2.11183741  | -2.55182335 | -7.21415181 |
| C | -2.28387292 | 4.34724721  | -3.87041193 |
| H | -2.70730588 | 4.35505569  | -2.86349772 |
| H | -1.40440153 | 5.00124881  | -3.87546665 |
| H | -3.02591782 | 4.76226710  | -4.56253761 |
| C | 3.23480931  | 1.85760695  | 4.03339160  |
| H | 3.93150488  | 1.82863106  | 4.87937439  |
| H | 3.56482644  | 2.63422123  | 3.33971672  |
| H | 2.24483462  | 2.13684390  | 4.41179874  |

**Table 69.** Geometric coordinates and thermally corrected MP2 energies for **31** S<sub>4</sub> tetramer

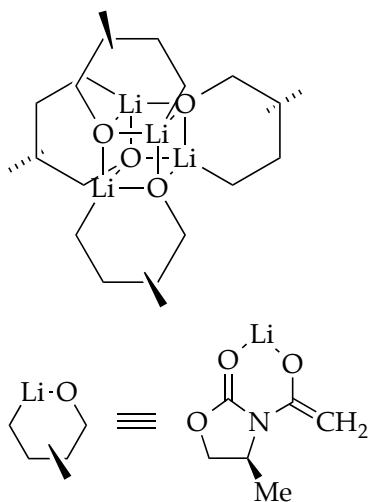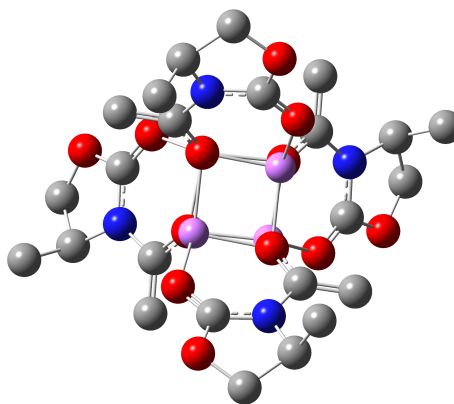

G = -2085.626801 Hartree

G<sub>MP2</sub> = -1304797.245 kcal/mol

ΔG<sub>MP2</sub> = 1.192916208 kcal/mol Li vs. **31** D<sub>2d</sub> tetramer

| Atom | X           | Y           | Z           | Atom | X           | Y           | Z           |
|------|-------------|-------------|-------------|------|-------------|-------------|-------------|
| Li   | 0.00000000  | 0.00000000  | 0.00000000  | N    | -0.56809705 | -3.79245680 | -1.15423257 |
| O    | 0.00000000  | 0.00000000  | 1.88604670  | C    | -1.14799657 | -2.46533035 | -1.09668517 |
| C    | 1.02125812  | 0.00000000  | 2.56359129  | O    | -0.30581729 | -1.47717727 | -1.27848147 |
| N    | 2.33694388  | -0.04401345 | 2.18762438  | Li   | -0.30571620 | -0.07739318 | -2.64573932 |
| C    | 3.21079484  | 0.15810051  | 3.35568398  | O    | -1.65748695 | 0.76843613  | -3.65189755 |
| C    | 2.22747277  | -0.16672659 | 4.49106972  | C    | -2.10802606 | 1.87560323  | -3.38021248 |
| H    | 2.28801032  | -1.21322269 | 4.81066801  | O    | -3.09805880 | 2.40425337  | -4.14838538 |
| H    | 2.33639403  | 0.48713147  | 5.35867992  | C    | -3.60078617 | 3.59277062  | -3.51407709 |
| O    | 0.92824622  | 0.05954824  | 3.91902863  | H    | -4.51561948 | 3.33430546  | -2.96879431 |
| H    | 4.02189922  | -0.57428127 | 3.33470537  | H    | -3.83289965 | 4.32216140  | -4.29267280 |
| C    | 3.77301819  | 1.58124992  | 3.42306627  | C    | -2.46528084 | 4.03701796  | -2.57974611 |
| H    | 4.33595249  | 1.81636855  | 2.51667484  | H    | -2.86913649 | 4.38174555  | -1.62431369 |
| H    | 2.96039128  | 2.30932937  | 3.52703712  | N    | -1.77331618 | 2.75194825  | -2.38287269 |
| H    | 4.44121544  | 1.68300987  | 4.28618467  | C    | -0.81330191 | 2.52863574  | -1.32002272 |
| C    | 2.84529479  | -0.16139785 | 0.83534491  | O    | -0.16763772 | 1.38947680  | -1.37850168 |
| O    | 1.94075395  | -0.09515490 | -0.11132469 | Li   | 1.78305742  | 1.16971706  | -1.59592028 |
| Li   | 1.62993926  | -1.48783218 | -1.48024248 | O    | 3.02459700  | 2.18771004  | -2.58452365 |
| O    | 1.74104931  | -3.36647700 | -1.35566325 | C    | 3.42874728  | 1.86514318  | -3.69593297 |
| C    | 0.76303121  | -4.09757690 | -1.25074252 | O    | 4.34120914  | 2.64815440  | -4.33157037 |
| O    | 0.93231280  | -5.44670327 | -1.22602180 | C    | 4.81425196  | 1.96162779  | -5.50313570 |
| C    | -0.31652880 | -6.07233579 | -0.88631929 | H    | 5.77245398  | 1.48675137  | -5.26354976 |
| H    | -0.30043684 | -6.32148959 | 0.18074472  | H    | 4.95960476  | 2.69938779  | -6.29476781 |
| H    | -0.40997460 | -6.98784839 | -1.47389456 | C    | 3.71303175  | 0.93767411  | -5.81703522 |
| C    | -1.38141688 | -5.01804063 | -1.22692787 | H    | 4.15287767  | -0.01567559 | -6.12108381 |
| H    | -2.15080062 | -4.99103623 | -0.45102149 | N    | 3.10563977  | 0.79255883  | -4.48324597 |

|   |             |             |             |
|---|-------------|-------------|-------------|
| C | 2.22364059  | -0.30347461 | -4.13405955 |
| O | 1.63934149  | -0.20181505 | -2.96519430 |
| C | 2.06871216  | -1.33032716 | -5.00246657 |
| H | 2.56831334  | -1.39612834 | -5.95825900 |
| H | 1.41345349  | -2.14571211 | -4.72128430 |
| C | 2.70934074  | 1.42803361  | -6.86550680 |
| H | 1.86234540  | 0.74226017  | -6.94188515 |
| H | 2.32998855  | 2.42011892  | -6.59525657 |
| H | 3.19310416  | 1.49820613  | -7.84676444 |
| C | -0.65352749 | 3.47332049  | -0.36367444 |
| H | -1.20419220 | 4.40241994  | -0.33182449 |
| H | 0.06103736  | 3.28581516  | 0.42848710  |
| C | -1.55360472 | 5.10262677  | -3.19656377 |
| H | -0.67611976 | 5.27285361  | -2.56842061 |
| H | -1.21417243 | 4.78555179  | -4.18924967 |
| H | -2.09745447 | 6.04854513  | -3.30278335 |
| C | -2.47577670 | -2.33331225 | -0.86902473 |
| H | -3.14706376 | -3.16424418 | -0.70537496 |
| H | -2.89619911 | -1.33536374 | -0.84132284 |
| C | -2.01617946 | -5.21473065 | -2.60691978 |
| H | -2.64362107 | -4.35917528 | -2.86781249 |
| H | -1.24015196 | -5.32401700 | -3.37315006 |
| H | -2.63695493 | -6.11829473 | -2.61191128 |
| C | 4.17489634  | -0.32423495 | 0.64066140  |
| H | 4.89937532  | -0.39270829 | 1.43959647  |
| H | 4.54065096  | -0.39785127 | -0.37630874 |

**Table 70.** Geometric coordinates and thermally corrected MP2 energies for **32 D<sub>2d</sub>** tetramer

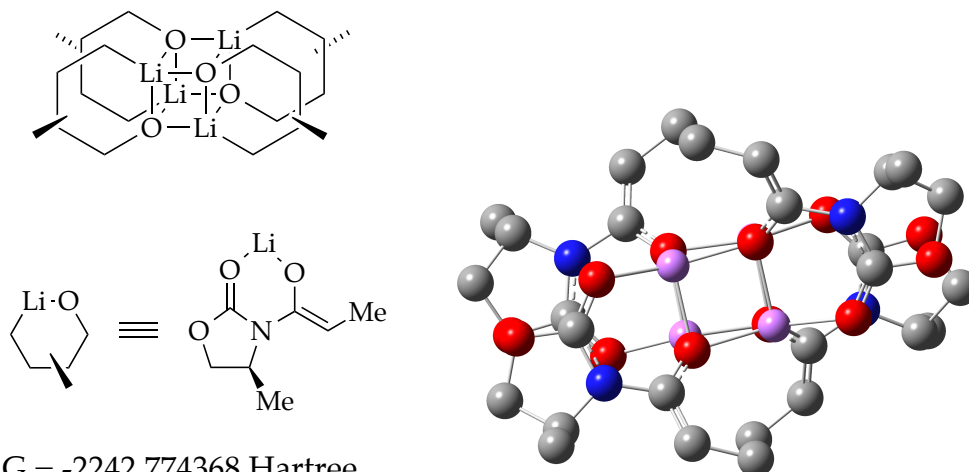

G = -2242.774368 Hartree

G<sub>MP2</sub> = -1403050.978 kcal/mol

ΔG<sub>MP2</sub> = 0.0 kcal/mol Li vs. **32 D<sub>2d</sub>** tetramer

| Atom | X           | Y           | Z           | Atom | X           | Y           | Z           |
|------|-------------|-------------|-------------|------|-------------|-------------|-------------|
| Li   | 0.00000000  | 0.00000000  | 0.00000000  | H    | -3.13516196 | 2.63845855  | -1.96842429 |
| O    | 0.00000000  | 0.00000000  | 1.91217630  | C    | -2.96052700 | 1.12421525  | -0.35195400 |
| C    | 1.06284457  | 0.00000000  | 2.52768217  | H    | -2.58079416 | 0.09535320  | -0.32948661 |
| O    | 1.13346388  | -0.55852210 | 3.77016533  | H    | -2.65443954 | 1.60266859  | 0.59152182  |
| C    | 2.52442931  | -0.61482956 | 4.16380616  | H    | -4.05523232 | 1.06216424  | -0.33417256 |
| H    | 2.90998879  | -1.60656140 | 3.90836564  | O    | -0.38018135 | 0.77310291  | -1.74134500 |
| H    | 2.57409102  | -0.45173754 | 5.24209363  | Li   | -0.02514328 | -1.03183944 | -2.50734002 |
| C    | 3.17911762  | 0.50320637  | 3.34059220  | O    | -0.28543428 | -1.06965154 | -4.40134605 |
| H    | 4.18215254  | 0.22664597  | 3.00606680  | C    | 0.63977385  | -0.78076027 | -5.15567857 |
| N    | 2.27643232  | 0.50942876  | 2.17734908  | O    | 0.37947852  | -0.24986095 | -6.38494374 |
| C    | 2.65817859  | 0.91389679  | 0.83741374  | C    | 1.63043349  | 0.19032753  | -6.96309600 |
| C    | 3.73837835  | 1.71097750  | 0.66867158  | H    | 1.75029664  | 1.25551717  | -6.74300638 |
| H    | 4.25288876  | 2.11142070  | 1.53366273  | H    | 1.57700058  | 0.02662874  | -8.04111151 |
| C    | 4.25586076  | 2.10610511  | -0.68816000 | C    | 2.68071161  | -0.67990865 | -6.25888876 |
| H    | 3.78522985  | 3.02312860  | -1.07586992 | H    | 3.60011072  | -0.12396878 | -6.05861601 |
| H    | 5.33571089  | 2.29433838  | -0.65610950 | N    | 1.98386154  | -0.91853232 | -4.98394875 |
| H    | 4.08974302  | 1.31876659  | -1.43366027 | C    | 2.64322797  | -1.17171086 | -3.71671760 |
| O    | 1.91724383  | 0.39800101  | -0.11859540 | C    | 3.91744126  | -1.62668966 | -3.71239476 |
| Li   | 1.56205157  | 0.95690182  | -1.94517098 | H    | 4.40155110  | -1.88203759 | -4.64712575 |
| O    | 1.41015913  | 2.25632511  | -3.33969418 | C    | 4.70532854  | -1.83213552 | -2.44672058 |
| C    | 0.32322453  | 2.46143436  | -3.87358557 | H    | 4.57100628  | -2.83702789 | -2.01672599 |
| O    | 0.26711859  | 2.89688680  | -5.16505446 | H    | 5.77942891  | -1.70746555 | -2.62920522 |
| C    | -1.11123704 | 2.84575399  | -5.60153374 | H    | 4.42615138  | -1.10945974 | -1.67014733 |
| H    | -1.26856340 | 1.89475548  | -6.11949288 | O    | 1.92384038  | -0.86800999 | -2.65873110 |
| H    | -1.27838312 | 3.68331867  | -6.28146884 | Li   | 1.99360418  | -1.46838797 | -0.81222716 |
| C    | -1.90891305 | 2.94486533  | -4.29379464 | O    | 2.40731832  | -2.72973515 | 0.56403908  |
| H    | -2.80621633 | 2.32136665  | -4.31753850 | C    | 1.50623530  | -3.22374292 | 1.23674995  |
| N    | -0.93592763 | 2.34010907  | -3.36877728 | O    | 1.75210685  | -3.63154482 | 2.51499278  |
| C    | -1.28300366 | 1.63874630  | -2.14714292 | C    | 0.48851321  | -3.96429663 | 3.13595653  |
| C    | -2.48390562 | 1.87076923  | -1.56866242 | H    | 0.14025195  | -3.08673454 | 3.68915875  |

|   |             |             |             |
|---|-------------|-------------|-------------|
| H | 0.65964420  | -4.80123633 | 3.81566974  |
| C | -0.41865391 | -4.31124136 | 1.94727419  |
| H | -1.44389028 | -3.96714274 | 2.10523941  |
| N | 0.20779925  | -3.47408398 | 0.91054330  |
| C | -0.48665802 | -2.92408843 | -0.23837254 |
| C | -1.63973853 | -3.49817498 | -0.65246759 |
| C | -2.46930702 | -2.94144271 | -1.77796816 |
| H | -2.40322290 | -1.84782063 | -1.83164757 |
| H | -2.17170827 | -3.33226202 | -2.76358851 |
| H | -3.52856061 | -3.19228690 | -1.64527249 |
| H | -1.98613052 | -4.41082314 | -0.18302688 |
| O | 0.06997005  | -1.84636799 | -0.74609194 |
| C | -0.38544526 | -5.80782234 | 1.61123136  |
| H | -0.89266333 | -6.02158200 | 0.66793226  |
| H | 0.65031361  | -6.15606658 | 1.52675996  |
| H | -0.87742479 | -6.38116493 | 2.40581470  |
| C | 2.97538134  | -1.97152248 | -7.03265385 |
| H | 3.50745611  | -1.73808563 | -7.96245087 |
| H | 3.58871031  | -2.66132568 | -6.44889578 |
| H | 2.04065717  | -2.48250357 | -7.29033372 |
| C | -2.25562174 | 4.39586004  | -3.93577035 |
| H | -2.66928975 | 4.47571865  | -2.92815894 |
| H | -1.35951103 | 5.02486947  | -3.98616173 |
| H | -2.99325697 | 4.79054491  | -4.64446441 |
| C | 3.19829179  | 1.84039275  | 4.09250912  |
| H | 3.89609548  | 1.78564150  | 4.93642435  |
| H | 3.50567419  | 2.66403002  | 3.44450475  |
| H | 2.20125625  | 2.07062647  | 4.48509341  |

**Table 71.** Geometric coordinates and thermally corrected MP2 energies for 32 S<sub>4</sub> tetramer

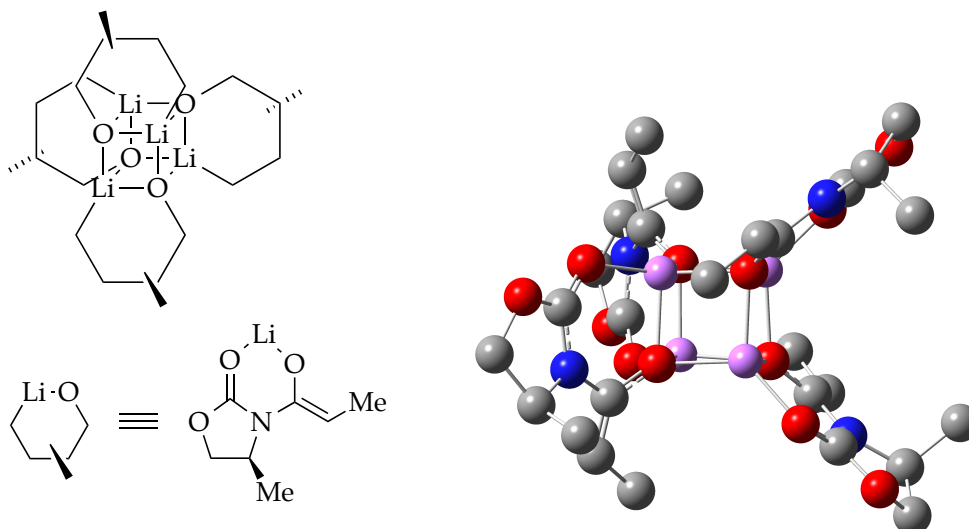

G = -2242.778425 Hartree

G<sub>MP2</sub> = -1403048.226 kcal/mol

ΔG<sub>MP2</sub> = 0.687774412 kcal/mol Li vs. 32 D<sub>2d</sub> tetramer

| Atom | X           | Y           | Z           | Atom | X           | Y           | Z           |
|------|-------------|-------------|-------------|------|-------------|-------------|-------------|
| Li   | 0.00000000  | 0.00000000  | 0.00000000  | N    | -1.40266416 | -3.53626594 | -1.41202023 |
| O    | 0.00000000  | 0.00000000  | 1.89315970  | C    | -1.62887059 | -2.16084236 | -0.99521638 |
| C    | 1.05016387  | 0.00000000  | 2.52878083  | O    | -0.66488082 | -1.31770463 | -1.30011483 |
| N    | 2.29665845  | -0.40263649 | 2.15254185  | Li   | -0.34123866 | 0.06592755  | -2.62309378 |
| C    | 3.28497380  | -0.10980914 | 3.20316476  | O    | -1.53845420 | 1.15479353  | -3.56649753 |
| C    | 2.34896954  | 0.16687645  | 4.39589480  | C    | -1.69703212 | 2.34637724  | -3.31963274 |
| H    | 2.23687277  | -0.70604510 | 5.04852205  | O    | -2.51920106 | 3.08598465  | -4.11376605 |
| H    | 2.65535319  | 1.02863887  | 4.99292789  | C    | -2.71190113 | 4.37649972  | -3.51290057 |
| O    | 1.06986265  | 0.45958184  | 3.80874341  | H    | -3.66558885 | 4.36993745  | -2.97272071 |
| H    | 3.88876196  | -0.99877123 | 3.40431767  | H    | -2.74804567 | 5.12276642  | -4.30917951 |
| C    | 4.19532286  | 1.06362415  | 2.83515862  | C    | -1.50861116 | 4.54409211  | -2.57385145 |
| H    | 4.72976661  | 0.85023995  | 1.90546382  | H    | -1.82487646 | 5.00696275  | -1.63590317 |
| H    | 3.61123661  | 1.98068470  | 2.69974184  | N    | -1.16226082 | 3.13095466  | -2.33656150 |
| H    | 4.93248159  | 1.23358320  | 3.62867315  | C    | -0.26047285 | 2.70408641  | -1.27443170 |
| C    | 2.65591046  | -0.91532420 | 0.83923528  | O    | 0.14356908  | 1.45540351  | -1.34680851 |
| O    | 1.88377595  | -0.51429457 | -0.14874488 | Li   | 1.97187871  | 0.77205016  | -1.60029300 |
| Li   | 1.22905134  | -1.76619206 | -1.51725679 | O    | 3.44540300  | 1.47493122  | -2.51879942 |
| O    | 0.94061620  | -3.63656855 | -1.46678329 | C    | 3.73750367  | 1.14907777  | -3.66529602 |
| C    | -0.18264340 | -4.11056838 | -1.60986240 | O    | 4.77050607  | 1.77669063  | -4.29190445 |
| O    | -0.32952098 | -5.39486945 | -2.03283255 | C    | 5.05652739  | 1.09122793  | -5.52151178 |
| C    | -1.71208244 | -5.77299870 | -1.92291171 | H    | 5.90540045  | 0.41806064  | -5.35532142 |
| H    | -1.82994762 | -6.39123022 | -1.02604142 | H    | 5.32258069  | 1.83586232  | -6.27451573 |
| H    | -1.97614058 | -6.36035396 | -2.80509141 | C    | 3.76195876  | 0.33162281  | -5.84539066 |
| C    | -2.48576823 | -4.44376006 | -1.82392455 | H    | 3.99604996  | -0.66421097 | -6.22949583 |
| H    | -3.23689120 | -4.51019192 | -1.03229555 | N    | 3.18008898  | 0.21758631  | -4.49570792 |

|   |             |             |             |
|---|-------------|-------------|-------------|
| C | 2.07427963  | -0.67851652 | -4.18306614 |
| O | 1.50730267  | -0.48624169 | -3.01291024 |
| C | 1.71984952  | -1.61257609 | -5.09885934 |
| H | 2.27617226  | -1.70429794 | -6.02365166 |
| C | 0.57880069  | -2.57237980 | -4.90904762 |
| H | -0.06606457 | -2.26930789 | -4.07859201 |
| H | -0.04559951 | -2.62734747 | -5.81151006 |
| H | 0.92329073  | -3.59529411 | -4.69587733 |
| C | 2.84236659  | 1.07999170  | -6.81538879 |
| H | 1.87232929  | 0.58263713  | -6.88763924 |
| H | 2.68117792  | 2.10845391  | -6.47249783 |
| H | 3.29402255  | 1.11500643  | -7.81371148 |
| C | 0.08853863  | 3.60291189  | -0.32203118 |
| H | -0.32773700 | 4.60266689  | -0.34083185 |
| C | 1.03413931  | 3.29536709  | 0.80513337  |
| H | 1.58229279  | 2.36539748  | 0.62612214  |
| H | 1.77389548  | 4.09810235  | 0.93048959  |
| H | 0.51498389  | 3.18571555  | 1.76893923  |
| C | -0.35230444 | 5.33070890  | -3.19898539 |
| H | 0.53389500  | 5.28436732  | -2.56176086 |
| H | -0.09622988 | 4.91763508  | -4.18137382 |
| H | -0.63650774 | 6.38151298  | -3.32900657 |
| C | -2.79035780 | -1.85822430 | -0.37287750 |
| H | -3.48104795 | -2.65441472 | -0.11617999 |
| C | -3.17049046 | -0.45898146 | 0.02725084  |
| H | -2.92787928 | -0.23909893 | 1.07764470  |
| H | -2.65462588 | 0.28573962  | -0.59011439 |
| H | -4.24889886 | -0.29401315 | -0.09302742 |
| C | -3.14741780 | -4.00448684 | -3.13173594 |
| H | -3.55941760 | -2.99711207 | -3.02710314 |
| H | -2.42144671 | -4.00149319 | -3.95237806 |
| H | -3.96388758 | -4.68873900 | -3.39083056 |
| C | 3.74070114  | -1.71535274 | 0.73379555  |
| H | 4.25993833  | -2.03100668 | 1.63247291  |
| C | 4.25643616  | -2.23530880 | -0.58003353 |
| H | 3.89155331  | -3.24834053 | -0.80623268 |
| H | 3.95544805  | -1.58644063 | -1.41083988 |
| H | 5.35297623  | -2.28267162 | -0.58193210 |

**Table 72.** Geometric coordinates and thermally corrected MP2 energies for **24** D<sub>2d</sub> tetramer

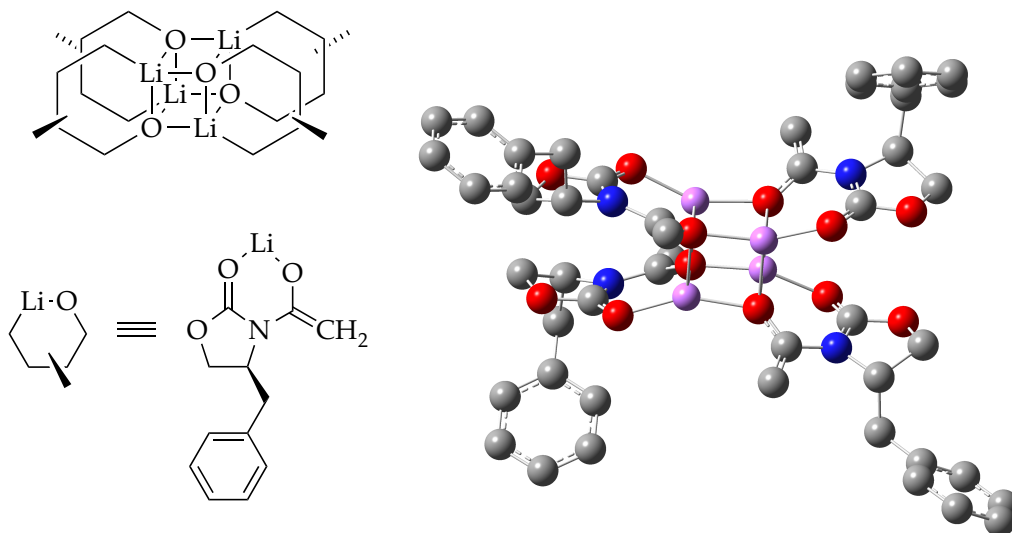

G = -3009.509144 Hartree  
 $G_{\text{MP2}} = -1882679.921$  kcal/mol  
 $\Delta G_{\text{MP2}} = 0.0$  kcal/mol Li vs. **24** D<sub>2d</sub> tetramer

| Atom | X           | Y           | Z           | Atom | X           | Y           | Z           |
|------|-------------|-------------|-------------|------|-------------|-------------|-------------|
| Li   | 0.00000000  | 0.00000000  | 0.00000000  | H    | -3.19756726 | 2.41135716  | -2.22000977 |
| O    | 0.00000000  | 0.00000000  | 1.89704380  | H    | -2.81134074 | 1.12753598  | -0.94311307 |
| C    | 1.04095165  | 0.00000000  | 2.54500686  | O    | -0.31822504 | 0.75729309  | -1.75097017 |
| O    | 1.04865719  | -0.47476380 | 3.81720989  | Li   | -0.04655814 | -1.08668465 | -2.47689859 |
| C    | 2.40749723  | -0.50812811 | 4.29955868  | O    | -0.29154775 | -1.11280999 | -4.35787463 |
| H    | 2.77393490  | -1.53608592 | 4.21474419  | C    | 0.63359608  | -0.90313802 | -5.13478068 |
| H    | 2.39674679  | -0.19607035 | 5.34493882  | O    | 0.37706829  | -0.45490369 | -6.39066460 |
| C    | 3.16952994  | 0.45618941  | 3.37602114  | C    | 1.62467109  | -0.14358024 | -7.04395288 |
| H    | 4.14324455  | 0.04382480  | 3.09693553  | H    | 1.77488741  | 0.93947515  | -6.99301863 |
| N    | 2.29263195  | 0.43124330  | 2.19841434  | H    | 1.54477858  | -0.46530021 | -8.08338961 |
| C    | 2.74237815  | 0.70872883  | 0.85091585  | C    | 2.68495370  | -0.91356383 | -6.23993225 |
| C    | 3.94639849  | 1.29421539  | 0.65535734  | H    | 3.57806405  | -0.30211736 | -6.08327857 |
| H    | 4.59575838  | 1.61704364  | 1.45597408  | N    | 1.98196172  | -1.05710654 | -4.95871054 |
| H    | 4.29542990  | 1.43625943  | -0.36065784 | C    | 2.65011805  | -1.21537908 | -3.68452942 |
| O    | 1.92529140  | 0.30712733  | -0.09259582 | C    | 3.96518188  | -1.53222619 | -3.65418302 |
| Li   | 1.62515067  | 0.86199921  | -1.92063305 | H    | 4.55889651  | -1.72248792 | -4.53632713 |
| O    | 1.54245685  | 2.16700447  | -3.30681455 | H    | 4.46448128  | -1.58380449 | -2.69380663 |
| C    | 0.48281755  | 2.40217284  | -3.87971401 | O    | 1.89576518  | -0.98136239 | -2.63795620 |
| O    | 0.48624859  | 2.88050803  | -5.15372330 | Li   | 1.95748605  | -1.56165948 | -0.79428333 |
| C    | -0.87421737 | 2.87820260  | -5.64914535 | O    | 2.33040307  | -2.83571592 | 0.57286486  |
| H    | -1.03002365 | 1.95265595  | -6.21183251 | C    | 1.42683847  | -3.28023971 | 1.27452168  |
| H    | -1.00020626 | 3.74412422  | -6.30004235 | O    | 1.69514259  | -3.72960488 | 2.53070642  |
| C    | -1.72396371 | 2.93452855  | -4.37468960 | C    | 0.44016315  | -4.00621762 | 3.19766130  |
| H    | -2.63013045 | 2.33203376  | -4.46933867 | H    | 0.16748109  | -3.12636785 | 3.78845821  |
| N    | -0.80303026 | 2.28218496  | -3.43274680 | H    | 0.58395805  | -4.87024422 | 3.84738508  |
| C    | -1.22392972 | 1.56344526  | -2.24890053 | C    | -0.53612206 | -4.25726131 | 2.04296610  |
| C    | -2.48576373 | 1.72213879  | -1.78844380 | H    | -1.52861392 | -3.85723688 | 2.26214041  |



|   |             |             |             |   |             |            |            |
|---|-------------|-------------|-------------|---|-------------|------------|------------|
| N | 0.09775652  | -3.43911373 | 0.99905061  | C | 0.55495302  | 3.28153911 | 6.13736918 |
| C | -0.61396761 | -2.84116458 | -0.11051576 | C | -0.23207202 | 3.92488952 | 5.18175444 |
| C | -1.86299281 | -3.26763040 | -0.40630039 | C | 0.16330778  | 3.91563645 | 3.84243291 |
| H | -2.35235611 | -4.08494886 | 0.10404319  | C | 1.33440749  | 3.26063168 | 3.46062177 |
| H | -2.41255657 | -2.76636044 | -1.19423828 | H | 1.64424075  | 3.27127449 | 2.41860753 |
| O | 0.03019097  | -1.86973027 | -0.71009188 | H | -0.43718638 | 4.42347210 | 3.09249343 |
| C | -0.62720823 | -5.75083183 | 1.64114988  | H | -1.14316545 | 4.43716548 | 5.47891473 |
| H | -1.13116859 | -5.81563900 | 0.67147230  | H | 0.26252014  | 3.29406614 | 7.18412352 |
| H | 0.39213002  | -6.12797194 | 1.49286095  | H | 2.34009505  | 2.13837807 | 6.50664296 |
| C | -1.34964112 | -6.59167753 | 2.67227451  |   |             |            |            |
| C | -0.65048801 | -7.47653142 | 3.50410269  |   |             |            |            |
| C | -1.31718445 | -8.23377344 | 4.46987576  |   |             |            |            |
| C | -2.69898693 | -8.11586988 | 4.61980927  |   |             |            |            |
| C | -3.40940466 | -7.23976131 | 3.79566780  |   |             |            |            |
| C | -2.73995218 | -6.48689619 | 2.83159313  |   |             |            |            |
| H | -3.30505543 | -5.81537730 | 2.18831904  |   |             |            |            |
| H | -4.48710541 | -7.14613532 | 3.90050277  |   |             |            |            |
| H | -3.22041482 | -8.70489009 | 5.36941677  |   |             |            |            |
| H | -0.75581007 | -8.91765072 | 5.10110671  |   |             |            |            |
| H | 0.42590632  | -7.58257739 | 3.38567478  |   |             |            |            |
| C | 3.11121466  | -2.25852541 | -6.88998734 |   |             |            |            |
| H | 3.62142007  | -2.00495252 | -7.82862910 |   |             |            |            |
| H | 3.85929847  | -2.72792940 | -6.24455817 |   |             |            |            |
| C | 1.98945075  | -3.23799811 | -7.15933309 |   |             |            |            |
| C | 1.43283653  | -3.36915678 | -8.43891700 |   |             |            |            |
| C | 0.38776110  | -4.26273455 | -8.67911908 |   |             |            |            |
| C | -0.11645361 | -5.04378172 | -7.63881063 |   |             |            |            |
| C | 0.43775340  | -4.93325281 | -6.36177017 |   |             |            |            |
| C | 1.48446905  | -4.04173025 | -6.12542494 |   |             |            |            |
| H | 1.92155006  | -3.97271336 | -5.13239893 |   |             |            |            |
| H | 0.05929192  | -5.54548356 | -5.54762023 |   |             |            |            |
| H | -0.93022690 | -5.74000575 | -7.82283711 |   |             |            |            |
| H | -0.02820317 | -4.35081379 | -9.67941131 |   |             |            |            |
| H | 1.83005374  | -2.77539071 | -9.26008038 |   |             |            |            |
| C | -2.07397031 | 4.38106466  | -3.94395384 |   |             |            |            |
| H | -2.45074565 | 4.35196124  | -2.91650891 |   |             |            |            |
| H | -1.14613438 | 4.96584961  | -3.92338423 |   |             |            |            |
| C | -3.08384690 | 5.03717261  | -4.86146204 |   |             |            |            |
| C | -4.42982202 | 4.64059773  | -4.84130534 |   |             |            |            |
| C | -5.36121797 | 5.22274303  | -5.70038481 |   |             |            |            |
| C | -4.96313997 | 6.21705300  | -6.59724124 |   |             |            |            |
| C | -3.62937841 | 6.62453943  | -6.62542461 |   |             |            |            |
| C | -2.69951496 | 6.03756037  | -5.76436391 |   |             |            |            |
| H | -1.66331425 | 6.36888984  | -5.78450413 |   |             |            |            |
| H | -3.31046148 | 7.40228417  | -7.31439958 |   |             |            |            |
| H | -5.68897595 | 6.67306034  | -7.26504512 |   |             |            |            |
| H | -6.39953661 | 4.90346839  | -5.66642922 |   |             |            |            |
| H | -4.75339270 | 3.87431836  | -4.13973700 |   |             |            |            |
| C | 3.38415196  | 1.86949710  | 3.98404312  |   |             |            |            |
| H | 4.05308532  | 1.74167061  | 4.84534751  |   |             |            |            |
| H | 3.92721526  | 2.47659563  | 3.25393117  |   |             |            |            |
| C | 2.12611325  | 2.59517589  | 4.40947923  |   |             |            |            |
| C | 1.72439680  | 2.62412715  | 5.75191810  |   |             |            |            |

**Table 73.** Geometric coordinates and thermally corrected MP2 energies for **24 S<sub>4</sub>** tetramer

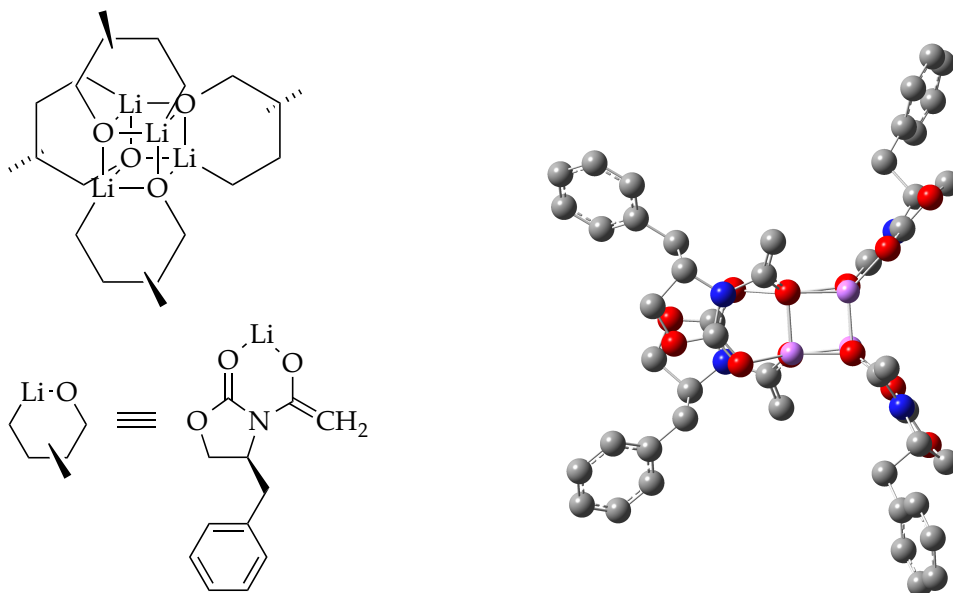

G = -3009.519077 Hartree

G<sub>MP2</sub> = -1882679.503 kcal/mol

ΔG<sub>MP2</sub> = 0.104548176 kcal/mol Li vs. **24 D<sub>2d</sub>** tetramer

| Atom | X          | Y           | Z          | Atom | X           | Y           | Z           |
|------|------------|-------------|------------|------|-------------|-------------|-------------|
| Li   | 0.00000000 | 0.00000000  | 0.00000000 | C    | 2.85268827  | -0.09754369 | 0.84872769  |
| O    | 0.00000000 | 0.00000000  | 1.88639640 | O    | 1.95055258  | -0.04354120 | -0.10187270 |
| C    | 1.01709881 | 0.00000000  | 2.57016047 | Li   | 1.67549316  | -1.43487189 | -1.47184171 |
| N    | 2.33692266 | -0.01675945 | 2.19950735 | O    | 1.77388013  | -3.32202874 | -1.51741610 |
| C    | 3.19615701 | 0.18865187  | 3.37582080 | C    | 0.78754718  | -4.03609348 | -1.66449011 |
| C    | 2.22055227 | -0.19546729 | 4.49544723 | O    | 0.93925558  | -5.33828751 | -2.01769864 |
| H    | 2.29862803 | -1.25308318 | 4.77055220 | C    | -0.32910011 | -6.00928290 | -1.90248401 |
| H    | 2.31742443 | 0.42186286  | 5.38936174 | H    | -0.34390927 | -6.55599939 | -0.95338794 |
| O    | 0.91848164 | 0.03061181  | 3.92430436 | H    | -0.42293413 | -6.71506621 | -2.72895229 |
| H    | 4.03968761 | -0.50475034 | 3.34850626 | C    | -1.37115062 | -4.88077074 | -1.94095652 |
| C    | 3.70856913 | 1.64672603  | 3.46709656 | H    | -2.15440554 | -5.06643845 | -1.20268746 |
| H    | 4.19613118 | 1.88714620  | 2.51656553 | N    | -0.54091188 | -3.73927543 | -1.52806709 |
| H    | 2.84059043 | 2.31058828  | 3.56325913 | C    | -1.09354942 | -2.44457794 | -1.17577725 |
| C    | 4.66263526 | 1.85846936  | 4.62247551 | O    | -0.28489807 | -1.42504548 | -1.34269401 |
| C    | 5.97842694 | 1.37507592  | 4.55695668 | Li   | -0.24472243 | 0.00165345  | -2.67200001 |
| H    | 6.32147770 | 0.87655957  | 3.65260633 | O    | -1.19738571 | 1.06575781  | -3.94162593 |
| C    | 6.85598285 | 1.53816382  | 5.62829088 | C    | -1.26877744 | 2.28387438  | -3.79003705 |
| H    | 7.87236965 | 1.16008429  | 5.55556208 | O    | -1.38812599 | 3.10572326  | -4.86563429 |
| C    | 6.43334597 | 2.19204462  | 6.78811392 | C    | -1.63964788 | 4.45163515  | -4.40931940 |
| C    | 5.13006303 | 2.68346222  | 6.86514469 | H    | -2.69814086 | 4.67338840  | -4.57809686 |
| C    | 4.25397690 | 2.51647229  | 5.79039009 | H    | -1.02872669 | 5.13510902  | -5.00115148 |
| H    | 3.24299682 | 2.91371051  | 5.85353757 | C    | -1.27145671 | 4.45226303  | -2.91029842 |
| H    | 4.79371708 | 3.20122188  | 7.75959310 | H    | -2.06693487 | 4.92903379  | -2.33063576 |
| H    | 7.11743262 | 2.32210794  | 7.62229450 | N    | -1.24849282 | 3.00772321  | -2.64080695 |

|    |             |             |              |   |             |             |             |
|----|-------------|-------------|--------------|---|-------------|-------------|-------------|
| C  | -0.99912666 | 2.43820687  | -1.32494954  | H | -1.20340580 | -4.53989865 | -4.06792574 |
| O  | -0.16049272 | 1.42978161  | -1.31334993  | C | -2.94237412 | -5.77149197 | -3.73718808 |
| Li | 1.78319165  | 1.24756956  | -1.57462964  | C | -4.21029481 | -5.88833477 | -3.14729550 |
| O  | 2.61362888  | 2.52088523  | -2.74195029  | H | -4.53244350 | -5.14559849 | -2.42017142 |
| C  | 2.66197522  | 2.31715948  | -3.95337857  | C | -5.06727676 | -6.93278100 | -3.49248288 |
| O  | 2.73134225  | 3.35978627  | -4.82315462  | H | -6.04717209 | -7.00270057 | -3.02748690 |
| C  | 2.97725293  | 2.85200538  | -6.15167135  | C | -4.67199226 | -7.88124749 | -4.43885765 |
| H  | 4.03045689  | 3.02880195  | -6.39220056  | C | -3.41682148 | -7.77401869 | -5.03803414 |
| H  | 2.34896399  | 3.40402525  | -6.85245105  | C | -2.56081659 | -6.72744181 | -4.68807990 |
| C  | 2.63486609  | 1.34954501  | -6.08252177  | H | -1.58896324 | -6.64334460 | -5.17008415 |
| H  | 3.42562304  | 0.76342568  | -6.55881559  | H | -3.10292992 | -8.50161087 | -5.78190172 |
| N  | 2.65718573  | 1.13798392  | -4.62841116  | H | -5.34063058 | -8.69347543 | -4.71081448 |
| C  | 2.47720255  | -0.16300127 | -4.00192980  | C | 4.18723054  | -0.21886481 | 0.65405302  |
| O  | 1.69841165  | -0.16151946 | -2.94674831  | H | 4.91019429  | -0.28739204 | 1.45438001  |
| C  | 3.08546651  | -1.22857632 | -4.56367163  | H | 4.55760344  | -0.27232270 | -0.36278781 |
| H  | 3.76342119  | -1.13025489 | -5.40248509  |   |             |             |             |
| H  | 2.91991492  | -2.21764769 | -4.15269896  |   |             |             |             |
| C  | 1.27235839  | 0.97102668  | -6.70485089  |   |             |             |             |
| H  | 1.07704657  | -0.07620141 | -6.44785426  |   |             |             |             |
| H  | 0.48577983  | 1.56793513  | -6.23139012  |   |             |             |             |
| C  | 1.25027335  | 1.16107026  | -8.20575998  |   |             |             |             |
| C  | 1.97830157  | 0.30661090  | -9.04797522  |   |             |             |             |
| H  | 2.53765609  | -0.52158265 | -8.61720670  |   |             |             |             |
| C  | 1.98071640  | 0.49385849  | -10.42983605 |   |             |             |             |
| H  | 2.54750371  | -0.18175158 | -11.06529001 |   |             |             |             |
| C  | 1.25056627  | 1.54103638  | -10.99715393 |   |             |             |             |
| C  | 0.51636392  | 2.39388526  | -10.17260851 |   |             |             |             |
| C  | 0.51813906  | 2.20422270  | -8.78885209  |   |             |             |             |
| H  | -0.07021407 | 2.86067343  | -8.15134517  |   |             |             |             |
| H  | -0.06343808 | 3.20523877  | -10.60506609 |   |             |             |             |
| H  | 1.24931425  | 1.68580308  | -12.07415565 |   |             |             |             |
| C  | -1.61096405 | 3.00338663  | -0.26354892  |   |             |             |             |
| H  | -2.33864007 | 3.79791254  | -0.37490420  |   |             |             |             |
| H  | -1.39246405 | 2.64556510  | 0.73591311   |   |             |             |             |
| C  | 0.07749012  | 5.12723760  | -2.57611457  |   |             |             |             |
| H  | 0.27756259  | 4.94425949  | -1.51425818  |   |             |             |             |
| H  | 0.87365083  | 4.63052654  | -3.13991186  |   |             |             |             |
| C  | 0.07141295  | 6.61198623  | -2.86694936  |   |             |             |             |
| C  | 0.80038670  | 7.13444725  | -3.94407546  |   |             |             |             |
| H  | 1.40505219  | 6.46294534  | -4.54989629  |   |             |             |             |
| C  | 0.77742861  | 8.50124354  | -4.23027719  |   |             |             |             |
| H  | 1.35499954  | 8.88699332  | -5.06641849  |   |             |             |             |
| C  | 0.02183088  | 9.36930955  | -3.44165969  |   |             |             |             |
| C  | -0.70491899 | 8.86283545  | -2.36144739  |   |             |             |             |
| C  | -0.67805256 | 7.49766274  | -2.07759159  |   |             |             |             |
| H  | -1.23555217 | 7.11525593  | -1.22472951  |   |             |             |             |
| H  | -1.28818724 | 9.53303811  | -1.73523736  |   |             |             |             |
| H  | 0.00401739  | 10.43340332 | -3.66142414  |   |             |             |             |
| C  | -2.37145997 | -2.37817592 | -0.73837408  |   |             |             |             |
| H  | -2.98798893 | -3.25023288 | -0.56760549  |   |             |             |             |
| H  | -2.79938744 | -1.40787365 | -0.51608901  |   |             |             |             |
| C  | -2.00883113 | -4.65206158 | -3.33163563  |   |             |             |             |
| H  | -2.54831909 | -3.69954739 | -3.29115124  |   |             |             |             |

**Table 74.** Geometric coordinates and thermally corrected MP2 energies for **28** D<sub>2d</sub> tetramer

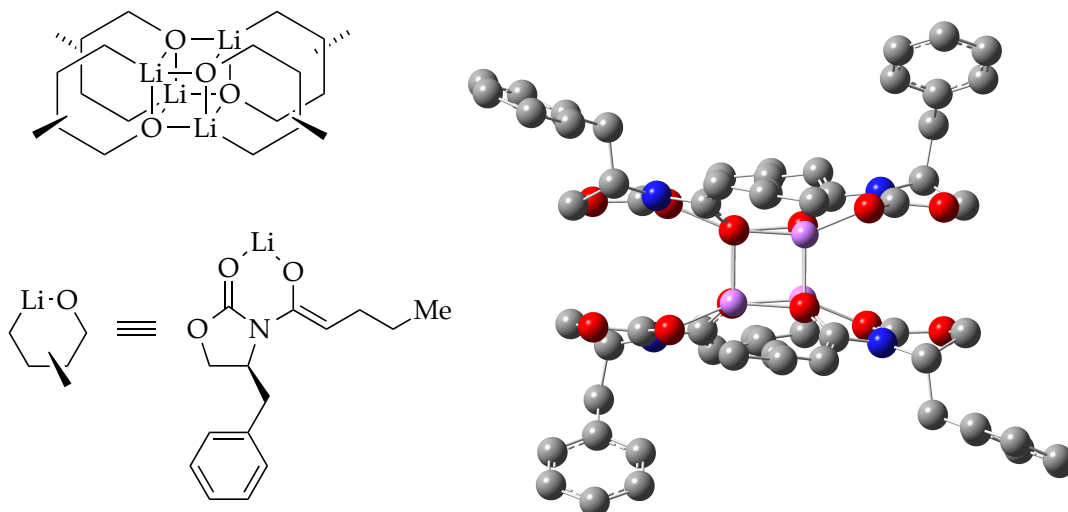

G = -3480.950722 Hartree  
 $G_{\text{MP2}} = -2177412.233$  kcal/mol  
 $\Delta G_{\text{MP2}} = 0.0$  kcal/mol Li vs. **28** D<sub>2d</sub> tetramer

| Atom | X           | Y           | Z           | Atom | X           | Y           | Z           |
|------|-------------|-------------|-------------|------|-------------|-------------|-------------|
| Li   | 0.00000000  | 0.00000000  | 0.00000000  | C    | -1.99135361 | 3.04479937  | -4.18209556 |
| O    | 0.00000000  | 0.00000000  | 1.89850500  | H    | -2.89099121 | 2.42684470  | -4.22640039 |
| C    | 1.06047699  | 0.00000000  | 2.51615129  | N    | -1.00800804 | 2.40677204  | -3.29425534 |
| O    | 1.15143216  | -0.62286899 | 3.71999847  | C    | -1.33553426 | 1.65786037  | -2.09462216 |
| C    | 2.53029117  | -0.61687776 | 4.14590138  | C    | -2.53577809 | 1.85534310  | -1.50099652 |
| H    | 2.96036837  | -1.59706125 | 3.91893277  | H    | -3.20032501 | 2.62634535  | -1.87457533 |
| H    | 2.54310005  | -0.43781539 | 5.2224062   | C    | -3.01454226 | 1.07109170  | -0.30709504 |
| C    | 3.18202062  | 0.51155543  | 3.32810054  | H    | -2.54558221 | 0.07683330  | -0.29619079 |
| H    | 4.17171572  | 0.22086377  | 2.96421595  | H    | -2.70774553 | 1.55596385  | 0.63582364  |
| N    | 2.25913459  | 0.56494534  | 2.18597889  | C    | -4.54189499 | 0.89368773  | -0.28057399 |
| C    | 2.61566041  | 1.00878706  | 0.85049913  | H    | -5.01942627 | 1.88433097  | -0.30666412 |
| C    | 3.64102701  | 1.87779742  | 0.68960864  | H    | -4.85914361 | 0.37803503  | -1.19759886 |
| H    | 4.12994061  | 2.30140447  | 1.55866141  | O    | -0.41445592 | 0.79722539  | -1.72206478 |
| C    | 4.15656517  | 2.31374904  | -0.65720096 | Li   | -0.01717204 | -0.99122070 | -2.50387320 |
| H    | 3.63835476  | 3.22391379  | -1.00562422 | O    | -0.30638702 | -1.04379684 | -4.37947437 |
| H    | 3.94126115  | 1.54196778  | -1.40995019 | C    | 0.57930943  | -0.68883471 | -5.15124621 |
| C    | 5.66906741  | 2.59303716  | -0.66135735 | O    | 0.26132653  | -0.10752732 | -6.33719111 |
| H    | 5.89737211  | 3.35029585  | 0.10288836  | C    | 1.47247028  | 0.35896984  | -6.96820333 |
| H    | 6.20362889  | 1.68243635  | -0.35748230 | H    | 1.56034731  | 1.43366413  | -6.78231889 |
| O    | 1.90656969  | 0.46296359  | -0.11313429 | H    | 1.38319281  | 0.16588646  | -8.03847565 |
| Li   | 1.52552135  | 1.03847186  | -1.92706141 | C    | 2.59525646  | -0.44566491 | -6.29084692 |
| O    | 1.33999545  | 2.37603783  | -3.27460494 | H    | 3.46305441  | 0.18391518  | -6.07413131 |
| C    | 0.24754577  | 2.57813023  | -3.79811903 | N    | 1.93535042  | -0.78765968 | -5.02333903 |
| O    | 0.17535450  | 3.06799547  | -5.06754509 | C    | 2.62402838  | -1.04065918 | -3.77060131 |
| C    | -1.20667861 | 3.01161811  | -5.49816698 | C    | 3.90101591  | -1.48931534 | -3.79205011 |
| H    | -1.35383841 | 2.07813213  | -6.04952981 | H    | 4.36902516  | -1.73817153 | -4.73691763 |
| H    | -1.39563218 | 3.86959401  | -6.14433184 | C    | 4.73572992  | -1.67878548 | -2.55227517 |

|    |             |             |             |   |             |             |             |
|----|-------------|-------------|-------------|---|-------------|-------------|-------------|
| H  | 4.63095555  | -2.70336087 | -2.15527999 | H | 1.68990466  | -2.00215200 | -9.48818114 |
| H  | 4.37961399  | -1.01225574 | -1.75382111 | C | -2.34224277 | 4.48917228  | -3.73972306 |
| C  | 6.23143285  | -1.40687465 | -2.78605846 | H | -2.65135598 | 4.46768286  | -2.69014782 |
| H  | 6.59270077  | -2.05556867 | -3.59742653 | H | -1.42702533 | 5.09213916  | -3.78475916 |
| H  | 6.35795541  | -0.37493055 | -3.14154511 | C | -3.42297338 | 5.11559254  | -4.59529732 |
| O  | 1.92400687  | -0.75208829 | -2.69541744 | C | -4.75574618 | 4.69054091  | -4.48297966 |
| Li | 2.04992681  | -1.37407541 | -0.86137887 | C | -5.75427236 | 5.24479710  | -5.28298917 |
| O  | 2.55346362  | -2.65339497 | 0.46116782  | C | -5.43798696 | 6.23872206  | -6.21227733 |
| C  | 1.69489916  | -3.21172852 | 1.13901697  | C | -4.11813080 | 6.67391994  | -6.33214570 |
| O  | 1.99353931  | -3.66039099 | 2.39047486  | C | -3.12084104 | 6.11502264  | -5.52976711 |
| C  | 0.76253663  | -4.08103619 | 3.02789175  | H | -2.09571016 | 6.46801185  | -5.62111366 |
| H  | 0.38272496  | -3.24378892 | 3.62103273  | H | -3.86237033 | 7.45147319  | -7.04718265 |
| H  | 0.98766220  | -4.93245931 | 3.67113095  | H | -6.21607621 | 6.67294835  | -6.83418911 |
| C  | -0.15113119 | -4.42413799 | 1.84622421  | H | -6.78092369 | 4.90395931  | -5.17787094 |
| H  | -1.19251421 | -4.16049638 | 2.04418867  | H | -5.01478777 | 3.92340838  | -3.75594084 |
| N  | 0.39807057  | -3.50629495 | 0.83713262  | C | 3.31832521  | 1.83737283  | 4.12872304  |
| C  | -0.35025989 | -2.95363175 | -0.27726248 | H | 3.99050915  | 1.62226228  | 4.96997853  |
| C  | -1.48026516 | -3.57635171 | -0.68628037 | H | 3.83478915  | 2.57256501  | 3.50507010  |
| C  | -2.38012768 | -3.04364551 | -1.77075930 | C | 2.02280454  | 2.42807551  | 4.64160487  |
| H  | -2.29635066 | -1.94891473 | -1.82649497 | C | 1.63576078  | 2.27492177  | 5.97971589  |
| H  | -2.07144521 | -3.41733482 | -2.76241646 | C | 0.43523915  | 2.81317292  | 6.44605280  |
| C  | -3.85777806 | -3.41262342 | -1.55763580 | C | -0.39828710 | 3.51791406  | 5.57725953  |
| H  | -3.94842197 | -4.50655412 | -1.48557312 | C | -0.01933588 | 3.68812836  | 4.24390107  |
| H  | -4.19081444 | -3.01462374 | -0.58905196 | C | 1.18221563  | 3.15138657  | 3.78112013  |
| H  | -1.76652413 | -4.52090186 | -0.23737676 | H | 1.47597689  | 3.29701675  | 2.74456416  |
| O  | 0.14179429  | -1.83511772 | -0.76169980 | H | -0.65729684 | 4.24404369  | 3.56202799  |
| C  | -0.03545379 | -5.91141970 | 1.42238189  | H | -1.33339348 | 3.93821751  | 5.93755798  |
| H  | -0.48838357 | -6.02896917 | 0.43311136  | H | 0.15477477  | 2.68482987  | 7.48828973  |
| H  | 1.02866628  | -6.15309384 | 1.31075323  | H | 2.28653682  | 1.73920100  | 6.66823192  |
| C  | -0.68364670 | -6.85346953 | 2.41474000  | C | 6.18690621  | 3.06898418  | -2.02157573 |
| C  | 0.08871697  | -7.65682693 | 3.26412068  | H | 5.68658468  | 3.99416906  | -2.33378789 |
| C  | -0.51420253 | -8.50785080 | 4.19310388  | H | 7.26539083  | 3.26427957  | -1.99553266 |
| C  | -1.90462869 | -8.56734917 | 4.28774543  | H | 6.00202779  | 2.31721820  | -2.79917439 |
| C  | -2.68734805 | -7.77396990 | 3.44548553  | C | 7.08439850  | -1.63258983 | -1.53450422 |
| C  | -2.08129491 | -6.92678823 | 2.51852426  | H | 6.99585473  | -2.66586736 | -1.17636614 |
| H  | -2.70069500 | -6.31995348 | 1.86104801  | H | 8.14513222  | -1.43595270 | -1.72976376 |
| H  | -3.77151574 | -7.81840768 | 3.50743145  | H | 6.76724489  | -0.97331549 | -0.71672566 |
| H  | -2.37629645 | -9.22972369 | 5.00853738  | C | -4.77286992 | -2.89870005 | -2.67249254 |
| H  | 0.10399637  | -9.12592354 | 4.83893621  | H | -4.47463648 | -3.30344444 | -3.64764351 |
| H  | 1.17365027  | -7.62467563 | 3.18846392  | H | -5.81751915 | -3.18193824 | -2.49778920 |
| C  | 3.06454724  | -1.66111596 | -7.13926615 | H | -4.73092757 | -1.80471909 | -2.74459732 |
| H  | 3.48195494  | -1.24735849 | -8.06683870 | C | -5.03661356 | 0.12265845  | 0.94629077  |
| H  | 3.89473082  | -2.15059198 | -6.62216461 | H | -4.75288237 | 0.63262452  | 1.87532584  |
| C  | 1.99679276  | -2.68298124 | -7.46491304 | H | -6.12792915 | 0.01753698  | 0.94195193  |
| C  | 1.38157769  | -2.71277791 | -8.72365143 | H | -4.60405914 | -0.88507243 | 0.97989844  |
| C  | 0.39027657  | -3.65091076 | -9.01633421 |   |             |             |             |
| C  | -0.00010506 | -4.57885076 | -8.05054042 |   |             |             |             |
| C  | 0.61290459  | -4.56800111 | -6.79573925 |   |             |             |             |
| C  | 1.60514710  | -3.63101839 | -6.50676992 |   |             |             |             |
| H  | 2.08560521  | -3.63533747 | -5.53153050 |   |             |             |             |
| H  | 0.32249681  | -5.29322053 | -6.04028830 |   |             |             |             |
| H  | -0.77142980 | -5.31047993 | -8.27564134 |   |             |             |             |
| H  | -0.07268600 | -3.65827431 | -9.99969687 |   |             |             |             |

**Table 75.** Geometric coordinates and thermally corrected MP2 energies for **28 S<sub>4</sub>** tetramer

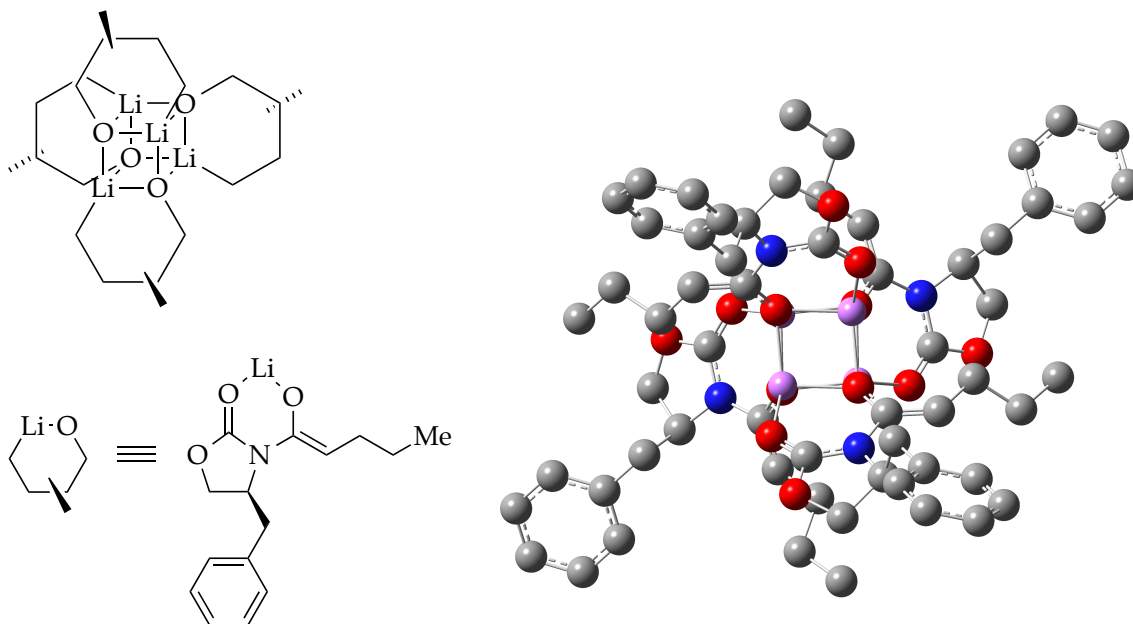

G = -3480.955593 Hartree

G<sub>MP2</sub> = -2177408.26 kcal/mol

ΔG<sub>MP2</sub> = 0.993177387 kcal/mol Li vs. **28 D<sub>2d</sub>** tetramer

| Atom | X           | Y           | Z           | Atom | X           | Y           | Z           |
|------|-------------|-------------|-------------|------|-------------|-------------|-------------|
| Li   | 0.00000000  | 0.00000000  | 0.00000000  | O    | -0.45211301 | -1.41713026 | -1.28809478 |
| O    | 0.00000000  | 0.00000000  | 1.89570250  | Li   | -0.24704482 | -0.06140664 | -2.65403890 |
| C    | 1.02739839  | 0.00000000  | 2.56715863  | O    | -1.50335139 | 0.82224544  | -3.71138223 |
| O    | 0.97407823  | 0.32582796  | 3.88666864  | C    | -1.87761935 | 1.97004055  | -3.49270637 |
| C    | 2.24915282  | 0.04248030  | 4.49263082  | O    | -2.82231855 | 2.52753944  | -4.29651246 |
| H    | 2.17575390  | -0.91822081 | 5.01369722  | C    | -3.24887923 | 3.77279648  | -3.71553810 |
| H    | 2.47143272  | 0.83027218  | 5.21368739  | H    | -4.16416226 | 3.59200264  | -3.14056078 |
| C    | 3.23750564  | -0.00812698 | 3.31662229  | H    | -3.45619644 | 4.47782126  | -4.52162161 |
| H    | 3.93047078  | -0.84209164 | 3.44851527  | C    | -2.07433310 | 4.18581592  | -2.82333965 |
| N    | 2.31368957  | -0.28008504 | 2.20472810  | H    | -2.43572694 | 4.64521489  | -1.90109225 |
| C    | 2.75921248  | -0.63106271 | 0.86655903  | N    | -1.49075670 | 2.86527064  | -2.53213045 |
| O    | 1.93392275  | -0.29772383 | -0.10166314 | C    | -0.56019406 | 2.62944394  | -1.43426314 |
| Li   | 1.48613779  | -1.63852970 | -1.47043173 | O    | -0.03905228 | 1.42309242  | -1.38549018 |
| O    | 1.37933666  | -3.52844692 | -1.36809520 | Li   | 1.87872493  | 0.99773837  | -1.53850736 |
| C    | 0.31719940  | -4.14309958 | -1.38977573 | O    | 3.23794188  | 1.93453271  | -2.40569848 |
| O    | 0.31338479  | -5.47999412 | -1.64040221 | C    | 3.65995372  | 1.63120063  | -3.51710531 |
| C    | -1.00708306 | -6.00001890 | -1.39702980 | O    | 4.67685830  | 2.35040672  | -4.06300147 |
| H    | -1.01444688 | -6.46863819 | -0.40698717 | C    | 5.13576719  | 1.67753673  | -5.24909029 |
| H    | -1.22733239 | -6.75194516 | -2.15600645 | H    | 6.00623287  | 1.06579250  | -4.98624940 |
| C    | -1.92890741 | -4.77204973 | -1.46575089 | H    | 5.42548975  | 2.42995902  | -5.98375412 |
| H    | -2.67165475 | -4.81908531 | -0.66624536 | C    | 3.93647259  | 0.82718075  | -5.67893465 |
| N    | -0.95972892 | -3.69726557 | -1.20260190 | H    | 4.26926749  | -0.13770203 | -6.06680655 |
| C    | -1.34724078 | -2.31942897 | -0.95005605 | N    | 3.26782348  | 0.64320675  | -4.37960491 |

|   |             |             |              |   |             |             |             |
|---|-------------|-------------|--------------|---|-------------|-------------|-------------|
| C | 2.26560469  | -0.38825874 | -4.13772832  | H | -5.21791147 | -1.27272194 | -0.41535423 |
| O | 1.67899778  | -0.34041399 | -2.96177930  | C | -2.64433384 | -4.58212108 | -2.82366491 |
| C | 2.03434402  | -1.29903353 | -5.11516375  | H | -3.07698582 | -3.57557783 | -2.82444540 |
| H | 2.57502176  | -1.23387061 | -6.05204451  | H | -1.89367605 | -4.61368102 | -3.62189720 |
| C | 1.07465680  | -2.45264699 | -5.00316683  | C | -3.71820101 | -5.61999768 | -3.06597050 |
| H | 0.75615412  | -2.57883517 | -3.96197686  | C | -4.94071747 | -5.55201044 | -2.38033225 |
| H | 0.15624302  | -2.25330554 | -5.58213176  | H | -5.12556750 | -4.72491455 | -1.69776158 |
| C | 1.68806953  | -3.77057402 | -5.51320465  | C | -5.92619374 | -6.51916670 | -2.57505075 |
| H | 2.59240846  | -3.99213414 | -4.93152356  | H | -6.86834792 | -6.44546010 | -2.03810945 |
| H | 2.01811630  | -3.63036518 | -6.55320849  | C | -5.70731025 | -7.57465950 | -3.46361798 |
| C | 3.01669994  | 1.53309317  | -6.70609913  | C | -4.49900068 | -7.65174307 | -4.15649224 |
| H | 2.07648454  | 0.97432933  | -6.75294893  | C | -3.51388540 | -6.68192916 | -3.95729869 |
| H | 2.77853560  | 2.53228352  | -6.32081869  | H | -2.57928823 | -6.74177566 | -4.51107688 |
| C | 3.64289337  | 1.63696334  | -8.07974792  | H | -4.32217076 | -8.46402231 | -4.85668936 |
| C | 3.73979729  | 0.50633164  | -8.90533070  | H | -6.47593303 | -8.32701960 | -3.61855753 |
| H | 3.32990417  | -0.44229365 | -8.56451064  | C | 3.95937153  | -1.24288500 | 0.72550972  |
| C | 4.33962798  | 0.58543793  | -10.16163155 | H | 4.52156942  | -1.52552250 | 1.61005331  |
| H | 4.40056953  | -0.30119089 | -10.78727931 | C | 4.58649483  | -1.57619062 | -0.60078709 |
| C | 4.85365021  | 1.80148542  | -10.61823381 | H | 4.60818233  | -2.66782184 | -0.75263113 |
| C | 4.75960019  | 2.93509707  | -9.81077270  | H | 3.97714361  | -1.16586712 | -1.41582427 |
| C | 4.15948641  | 2.85086750  | -8.55250427  | C | 6.02293909  | -1.03775650 | -0.74828520 |
| H | 4.07919205  | 3.74222038  | -7.93371653  | H | 6.00942032  | 0.05376713  | -0.62774204 |
| H | 5.14946954  | 3.88773741  | -10.15970490 | H | 6.64383500  | -1.43070620 | 0.07005014  |
| H | 5.31856010  | 1.86479236  | -11.59833455 | C | 4.03739093  | 1.29669745  | 3.09426858  |
| C | -0.32310932 | 3.64343439  | -0.56594336  | H | 4.52242026  | 1.21705611  | 2.11512265  |
| H | -0.80591105 | 4.60256351  | -0.71188917  | H | 3.33227787  | 2.13429543  | 3.04035378  |
| C | 0.56595122  | 3.54636270  | 0.64422964   | C | 5.06636682  | 1.54019724  | 4.17640038  |
| H | 0.81820023  | 2.49857453  | 0.84410567   | C | 6.25015351  | 0.78756051  | 4.21457822  |
| H | 1.52479349  | 4.06334452  | 0.46597505   | H | 6.44004082  | 0.05001740  | 3.43731642  |
| C | -0.08709909 | 4.16252808  | 1.89611365   | C | 7.19208558  | 0.98430427  | 5.22379539  |
| H | -1.03320684 | 3.64330509  | 2.09750449   | H | 8.10504558  | 0.39453947  | 5.23243564  |
| H | -0.35024360 | 5.20892733  | 1.68163981   | C | 6.96771396  | 1.94206570  | 6.21570535  |
| C | -1.06177497 | 5.12059258  | -3.53063494  | C | 5.79801652  | 2.70167563  | 6.18700529  |
| H | -0.15156625 | 5.14899562  | -2.92307240  | C | 4.85633202  | 2.50029805  | 5.17540100  |
| H | -0.79274186 | 4.66687748  | -4.49256366  | H | 3.95258900  | 3.10564750  | 5.15246408  |
| C | -1.60311125 | 6.51752700  | -3.74359358  | H | 5.61791103  | 3.45551964  | 6.94899474  |
| C | -2.02674554 | 6.94726034  | -5.00842240  | H | 7.70265502  | 2.09846051  | 7.00071107  |
| H | -1.93402313 | 6.27531900  | -5.85915927  | C | 6.66009938  | -1.40347493 | -2.09255606 |
| C | -2.54963477 | 8.22889292  | -5.19408882  | H | 7.67950582  | -1.00884610 | -2.17700379 |
| H | -2.86784444 | 8.54330558  | -6.18462501  | H | 6.70939234  | -2.49125581 | -2.22614818 |
| C | -2.65836372 | 9.10345881  | -4.11278043  | H | 6.07283637  | -0.99782982 | -2.92672572 |
| C | -2.23649346 | 8.69009103  | -2.84683131  | C | -5.11077930 | 0.88262258  | -0.55992856 |
| C | -1.71349931 | 7.41014304  | -2.66639527  | H | -6.10123049 | 0.99869439  | -1.01554529 |
| H | -1.37464603 | 7.10252656  | -1.67917129  | H | -5.21059132 | 1.08033643  | 0.51454305  |
| H | -2.30928387 | 9.36756913  | -2.00008066  | H | -4.45657774 | 1.65986613  | -0.97607603 |
| H | -3.06325592 | 10.10175269 | -4.25496797  | C | 0.72769837  | -4.96177826 | -5.44318192 |
| C | -2.56847539 | -2.07997996 | -0.41540046  | H | 1.17796251  | -5.86378469 | -5.87442969 |
| H | -3.19390093 | -2.91575589 | -0.11759154  | H | 0.46504722  | -5.19207651 | -4.40372044 |
| C | -3.13677215 | -0.70531800 | -0.19006526  | H | -0.19985326 | -4.75689898 | -5.99385746 |
| H | -3.20826828 | -0.49066178 | 0.88882008   | C | 0.80305869  | 4.10952144  | 3.14150132  |
| H | -2.46136213 | 0.05140356  | -0.60857851  | H | 0.33036688  | 4.61476667  | 3.99215806  |
| C | -4.53174022 | -0.51233104 | -0.81606510  | H | 0.99425909  | 3.07237741  | 3.44196235  |
| H | -4.46662517 | -0.69533284 | -1.89699202  | H | 1.76967350  | 4.59756029  | 2.95972050  |
